# Supplementary material for: Synthesis and Study of the Structure–Activity Relationship of Antiproliferative N-Substituted Isosteviol-Based 1,3-Aminoalcohols
Source: MDPI journal article supplement (doi:10.3390/ph17020262), 2024-02-19

Supporting informations  
for  
**Synthesis Study of the Structure–Activity Relationship of  
Antiproliferative *N*-Substituted Isosteviol-Based  
1,3-Aminoalcohols**

Dániel Ozsvár <sup>1</sup>, Noémi Bózsity <sup>2</sup>, István Zupkó <sup>2,3</sup> and Zsolt Szakonyi <sup>1,3,\*</sup>

<sup>1</sup> Interdisciplinary Excellence Center, Institute of Pharmaceutical Chemistry,  
University of Szeged, Eötvös utca 6, H-6720 Szeged, Hungary; ozsmozs88@gmail.com

<sup>2</sup> Institute of Pharmacodynamics and Biopharmacy, University of Szeged, Eötvös  
utca 6, H-6720 Szeged, Hungary; bozsity-farago.noemi@szte.hu (N.B.);  
zupko.istvan@szte.hu (I.Z.)

<sup>3</sup> Interdisciplinary Centre of Natural Products, University of Szeged, Eötvös utca 6,  
H-6720 Szeged, Hungary

\* Correspondence: szakonyi.zsolt@szte.hu; Tel.: +36-62-546809

## Contents

### Antiproliferative effects of the investigated compounds

|                                                                               |
|-------------------------------------------------------------------------------|
| <sup>1</sup> H, <sup>13</sup> C NMR, and 2D NMR spectra of compound <b>4</b>  |
| <sup>1</sup> H, <sup>13</sup> C NMR, and 2D NMR spectra of compound <b>5</b>  |
| <sup>1</sup> H, <sup>13</sup> C NMR, and 2D NMR spectra of compound <b>6</b>  |
| <sup>1</sup> H, <sup>13</sup> C NMR, and 2D NMR spectra of compound <b>7</b>  |
| <sup>1</sup> H, <sup>13</sup> C NMR, and 2D NMR spectra of compound <b>8</b>  |
| <sup>1</sup> H, <sup>13</sup> C NMR, and 2D NMR spectra of compound <b>10</b> |
| <sup>1</sup> H, <sup>13</sup> C NMR, and 2D NMR spectra of compound <b>11</b> |
| <sup>1</sup> H, <sup>13</sup> C NMR, and 2D NMR spectra of compound <b>12</b> |
| <sup>1</sup> H, <sup>13</sup> C NMR, and 2D NMR spectra of compound <b>13</b> |
| <sup>1</sup> H, <sup>13</sup> C NMR, and 2D NMR spectra of compound <b>14</b> |
| <sup>1</sup> H, <sup>13</sup> C NMR, and 2D NMR spectra of compound <b>15</b> |
| <sup>1</sup> H, <sup>13</sup> C NMR, and 2D NMR spectra of compound <b>16</b> |
| <sup>1</sup> H, <sup>13</sup> C NMR, and 2D NMR spectra of compound <b>17</b> |
| <sup>1</sup> H, <sup>13</sup> C NMR, and 2D NMR spectra of compound <b>18</b> |
| <sup>1</sup> H, <sup>13</sup> C NMR, and 2D NMR spectra of compound <b>19</b> |
| <sup>1</sup> H, <sup>13</sup> C NMR, and 2D NMR spectra of compound <b>20</b> |
| <sup>1</sup> H, <sup>13</sup> C NMR, and 2D NMR spectra of compound <b>23</b> |
| <sup>1</sup> H, <sup>13</sup> C NMR, and 2D NMR spectra of compound <b>24</b> |
| <sup>1</sup> H, <sup>13</sup> C NMR, and 2D NMR spectra of compound <b>25</b> |
| <sup>1</sup> H, <sup>13</sup> C NMR, and 2D NMR spectra of compound <b>26</b> |
| <sup>1</sup> H, <sup>13</sup> C NMR, and 2D NMR spectra of compound <b>27</b> |
| <sup>1</sup> H, <sup>13</sup> C NMR, and 2D NMR spectra of compound <b>28</b> |

### Table S1

|                    |
|--------------------|
| Figure S1 – S6     |
| Figure S7 – S13    |
| Figure S14 – S20   |
| Figure S21 – S26   |
| Figure S27 – S33   |
| Figure S34 – S39   |
| Figure S40 – S46   |
| Figure S47 – S53   |
| Figure S54 – S59   |
| Figure S60 – S66   |
| Figure S67 – S72   |
| Figure S73 – S78   |
| Figure S79 – S84   |
| Figure S85 – S90   |
| Figure S91 – S96   |
| Figure S97 – S102  |
| Figure S103 – S109 |
| Figure S110 – S115 |
| Figure S116 – S121 |
| Figure S122 – S127 |
| Figure S128 – S133 |
| Figure S134 – S139 |

**Table S1.** Calculated IC<sub>50</sub> values and 95% confidence intervals (CI) of the investigated molecules against four cancer cell lines and non-malignant fibroblasts (NIH/3T3)

| Compound  | HeLa             |            | A2780            |           | MDA-MB-231       |            | MCF-7            |           | NIH/3T3          |           |
|-----------|------------------|------------|------------------|-----------|------------------|------------|------------------|-----------|------------------|-----------|
|           | IC <sub>50</sub> | CI (95%)   | IC <sub>50</sub> | CI (95%)  | IC <sub>50</sub> | CI (95%)   | IC <sub>50</sub> | CI (95%)  | IC <sub>50</sub> | CI (95%)  |
| <b>4</b>  | > 10             | *          | > 10             |           | > 10             |            | > 10             |           | > 10             |           |
| <b>5</b>  | 4.17             | 3.79–4.60  | 4.57             | 3.59–5.81 | 5.98             | 4.84–7.37  | 4.29             | 3.77–4.89 | 4.27             | 3.67–4.95 |
| <b>6</b>  | > 10             |            | > 10             |           | > 10             |            | > 10             |           | > 10             |           |
| <b>7</b>  | > 10             |            | > 10             |           | > 10             |            | > 10             |           | > 10             |           |
| <b>8</b>  | > 10             |            | > 10             |           | > 10             |            | > 10             |           | > 10             |           |
| <b>11</b> | > 10             |            | > 10             |           | > 10             |            | > 10             |           | > 10             |           |
| <b>12</b> | > 10             |            | 4.78             | 3.68–6.21 | > 10             |            | > 10             |           | > 10             |           |
| <b>14</b> | 2.70             | 2.48–2.94  | 1.36             | 1.19–1.57 | 2.23             | 1.32–3.76  | 1.54             | 1.33–1.78 | 5.92             | 4.03–8.68 |
| <b>15</b> | 4.18             | 2.65–6.59  | 3.91             | 2.38–6.44 | 4.28             | 3.43–5.35  | 4.20             | 3.38–5.23 | 4.80             | 3.76–6.12 |
| <b>16</b> | 3.86             | 3.37–4.42  | 4.00             | 3.67–4.36 | 4.79             | 4.19–5.48  | 3.48             | 3.09–3.90 | 1.37             | 1.27–1.48 |
| <b>17</b> | 4.45             | 3.38–5.85  | 3.78             | 2.16–6.61 | 4.04             | 2.19–7.42  | 4.74             | 2.38–9.41 | 1.95             | 1.78–2.14 |
| <b>18</b> | 3.05             | 2.46–3.79  | 2.89             | 2.67–3.18 | 4.63             | 3.82–5.62  | 4.85             | 3.80–6.21 | 4.61             | 3.71–5.72 |
| <b>19</b> | 6.08             | 5.72–6.46  | 4.41             | 3.65–5.32 | 7.29             | 4.92–10.81 | 5.59             | 4.80–6.52 | 5.44             | 4.69–6.31 |
| <b>20</b> | 1.99             | 0.483–2.63 | 3.74             | 2.83–4.95 | 1.78             | 1.51–2.10  | 1.37             | 1.24–1.51 | 4.78             | 3.60–6.34 |
| <b>23</b> | 4.16             | 3.55–4.87  | 4.24             | 3.89–4.62 | 5.08             | 4.12–6.27  | 3.16             | 2.89–3.45 | 1.79             | 1.57–2.04 |
| <b>24</b> | 3.04             | 2.55–3.62  | 4.52             | 3.59–5.70 | 4.99             | 4.07–6.11  | 2.37             | 1.63–3.45 | 4.44             | 3.95–4.99 |
| <b>25</b> | 4.43             | 3.94–4.97  | 4.83             | 4.28–5.45 | 6.53             | 5.29–8.07  | 4.17             | 3.45–5.04 | 3.98             | 3.59–4.41 |
| <b>26</b> | 4.33             | 3.61–5.19  | 4.11             | 3.62–4.67 | 6.07             | 4.93–7.48  | 3.67             | 3.25–4.13 | 3.12             | 2.66–3.66 |
| <b>27</b> | 3.40             | 1.74–6.66  | 3.26             | 2.93–3.61 | 4.11             | 3.51–4.81  | 2.43             | 2.26–2.62 | 5.03             | 4.07–6.23 |
| <b>28</b> | 3.72             | 2.77–5.01  | 4.42             | 3.03–6.43 | 4.34             | 3.01–6.27  | 3.82             | 2.50–5.84 | 1.55             | 1.47–1.64 |

\* All values are given in  $\mu\text{M}$ . No IC<sub>50</sub> values were calculated when less than 50% cell growth inhibition was detected at 10  $\mu\text{M}$ .

Figure S1

<sup>1</sup>H-NMR of compound (4*R*,4*aS*,6*aS*,7*S*,8*R*,9*S*,11*bS*)-Benzyl 7-formyl-8-hydroxy-4,9,11*b*-trimethyltetradecahydro-6*a*,9-methanocyclohepta[*a*]naphthalene-4-carboxylate (**4**):

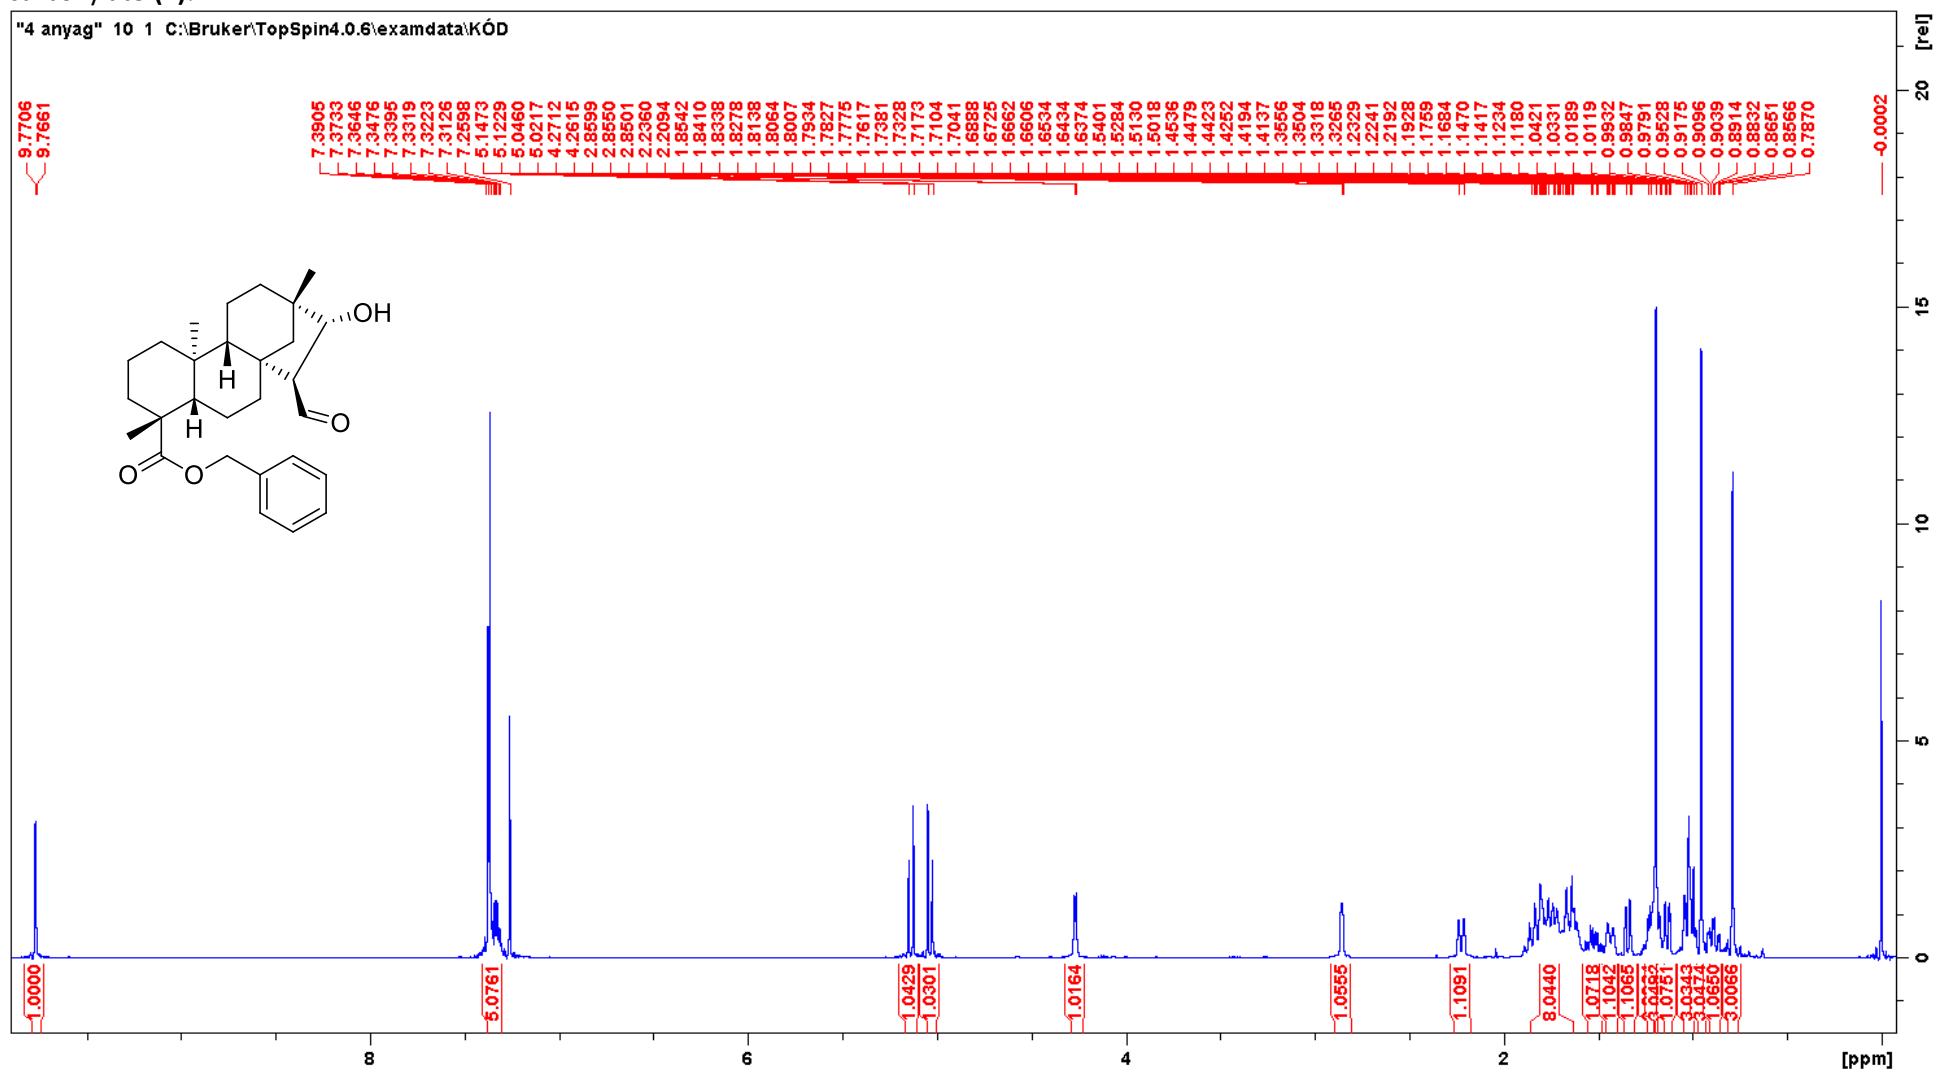

<sup>13</sup>C-NMR of compound (4*R*,4*aS*,6*aS*,7*S*,8*R*,9*S*,11*bS*)-Benzyl 7-formyl-8-hydroxy-4,9,11*b*-trimethyltetradecahydro-6*a*,9-methanocyclohepta[*a*]naphthalene-4-carboxylate (**4**):

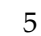

Figure S3

COSY NMR of compound (4*R*,4*aS*,6*aS*,7*S*,8*R*,9*S*,11*bS*)-Benzyl 7-formyl-8-hydroxy-4,9,11*b*-trimethyltetradecahydro-6*a*,9-methanocyclohepta[*a*]naphthalene-4-carboxylate (**4**):

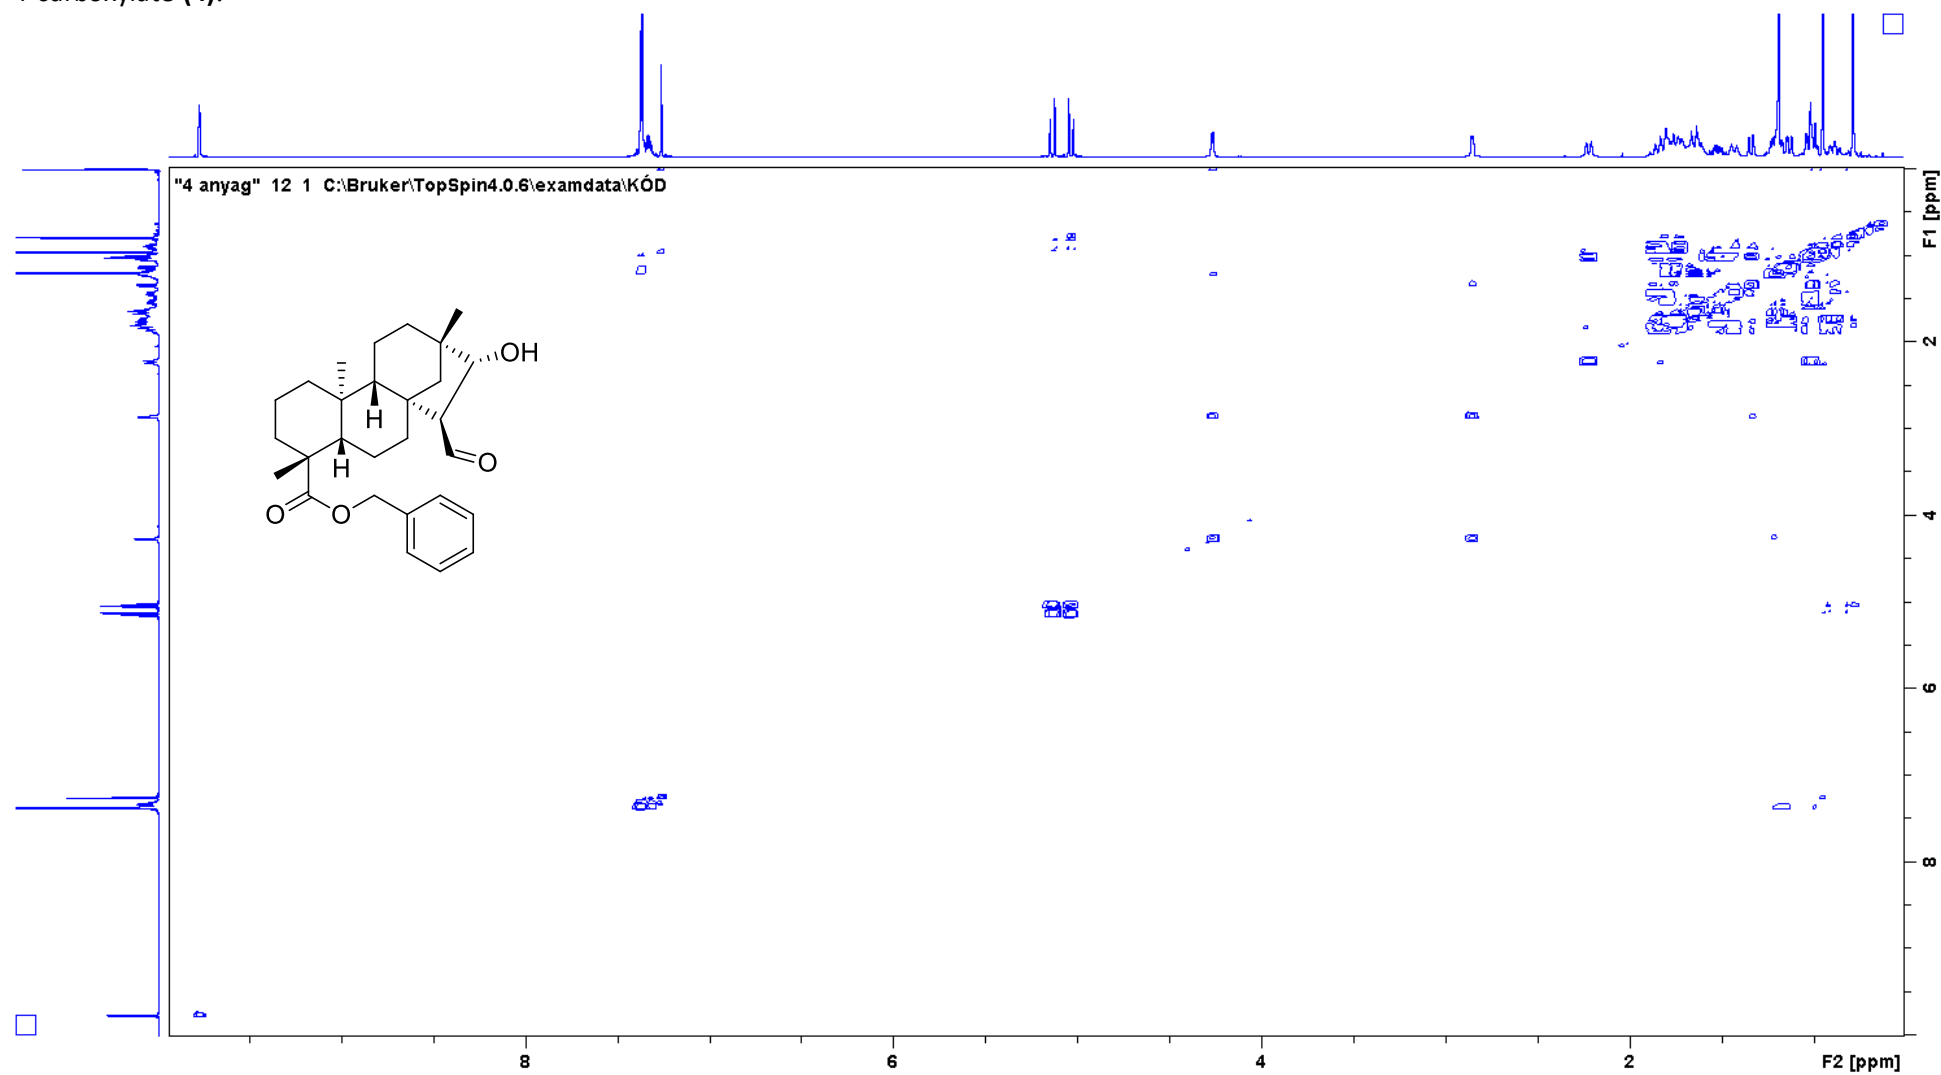

Figure S4

NOESY NMR of compound (4*R*,4*aS*,6*aS*,7*S*,8*R*,9*S*,11*bS*)-Benzyl 7-formyl-8-hydroxy-4,9,11*b*-trimethyltetradecahydro-6*a*,9-methanocyclohepta[*a*]naphthalene-4-carboxylate (**4**):

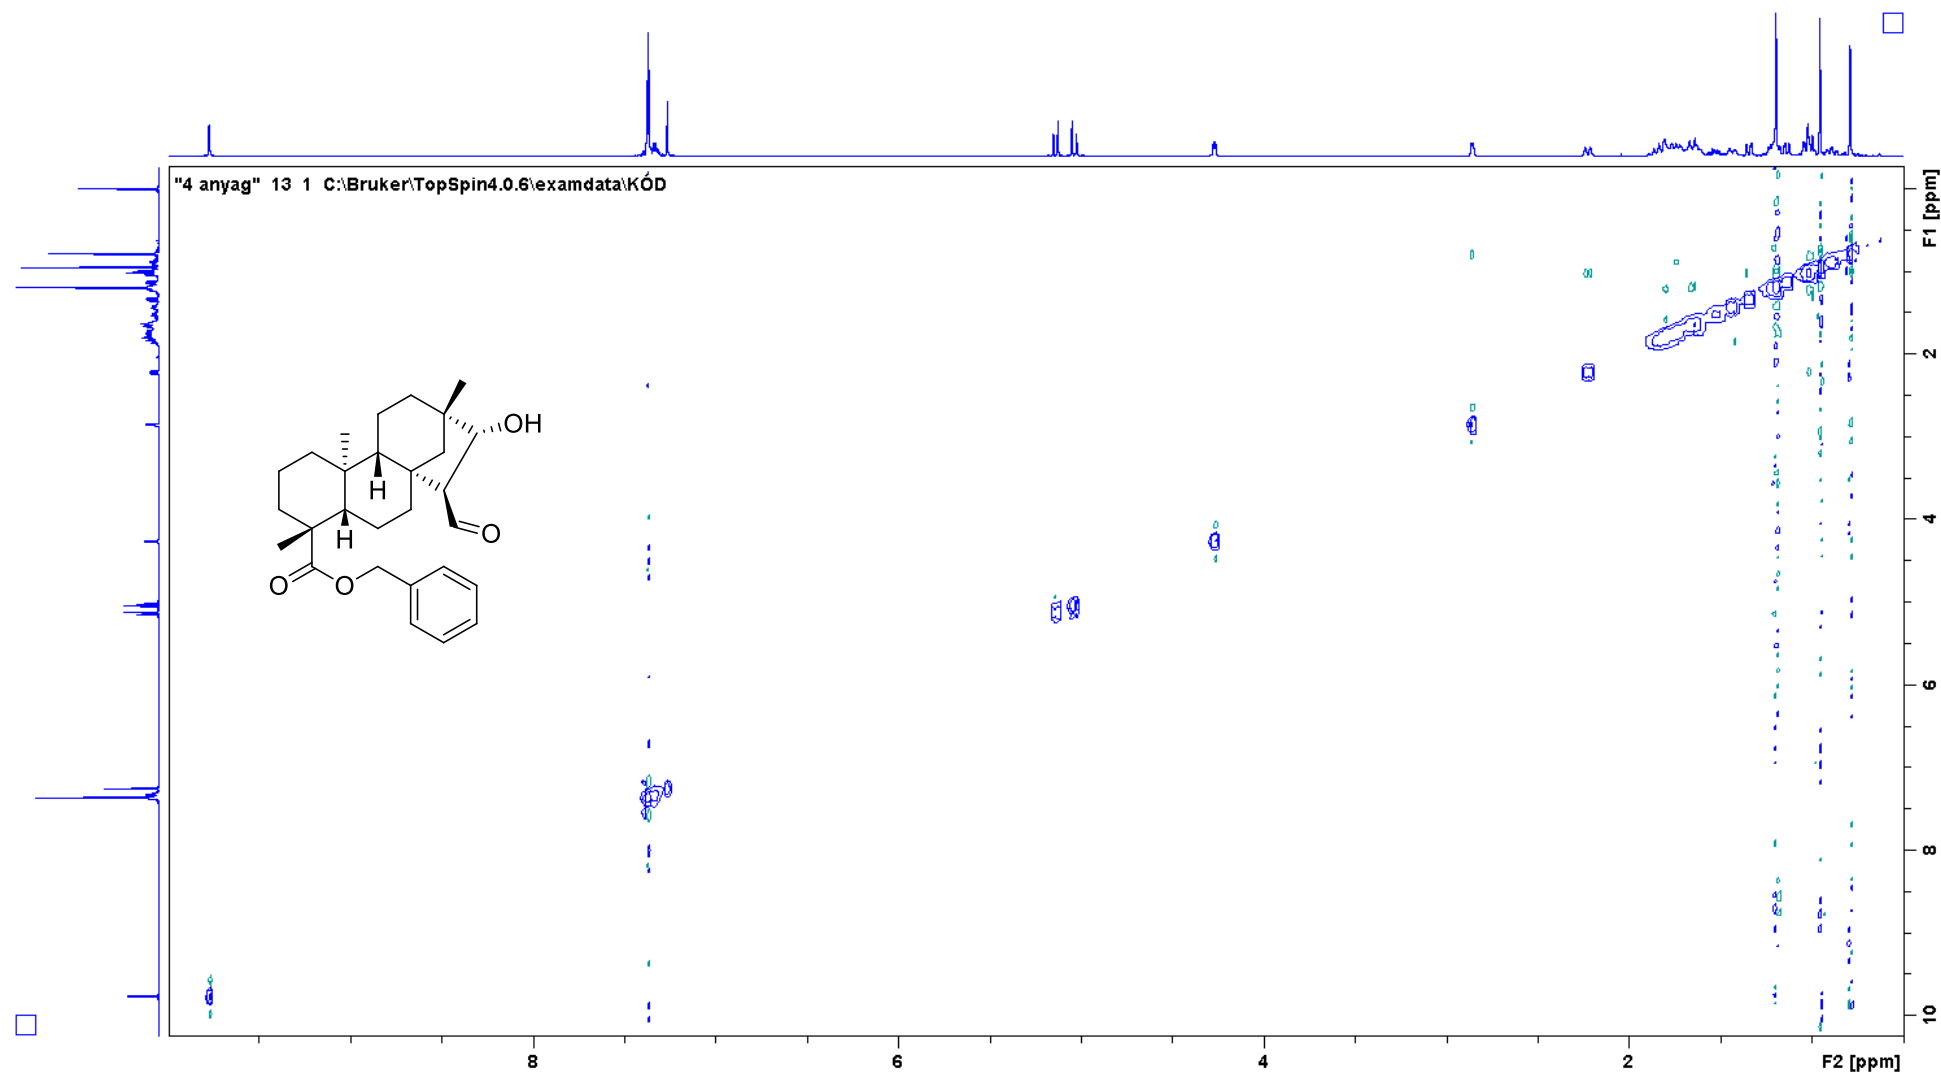

Figure S5

HSQC of compound (4*R*,4*aS*,6*aS*,7*S*,8*R*,9*S*,11*bS*)-Benzyl 7-formyl-8-hydroxy-4,9,11*b*-trimethyltetradecahydro-6*a*,9-methanocyclohepta[*a*]naphthalene-4-carboxylate (**4**):

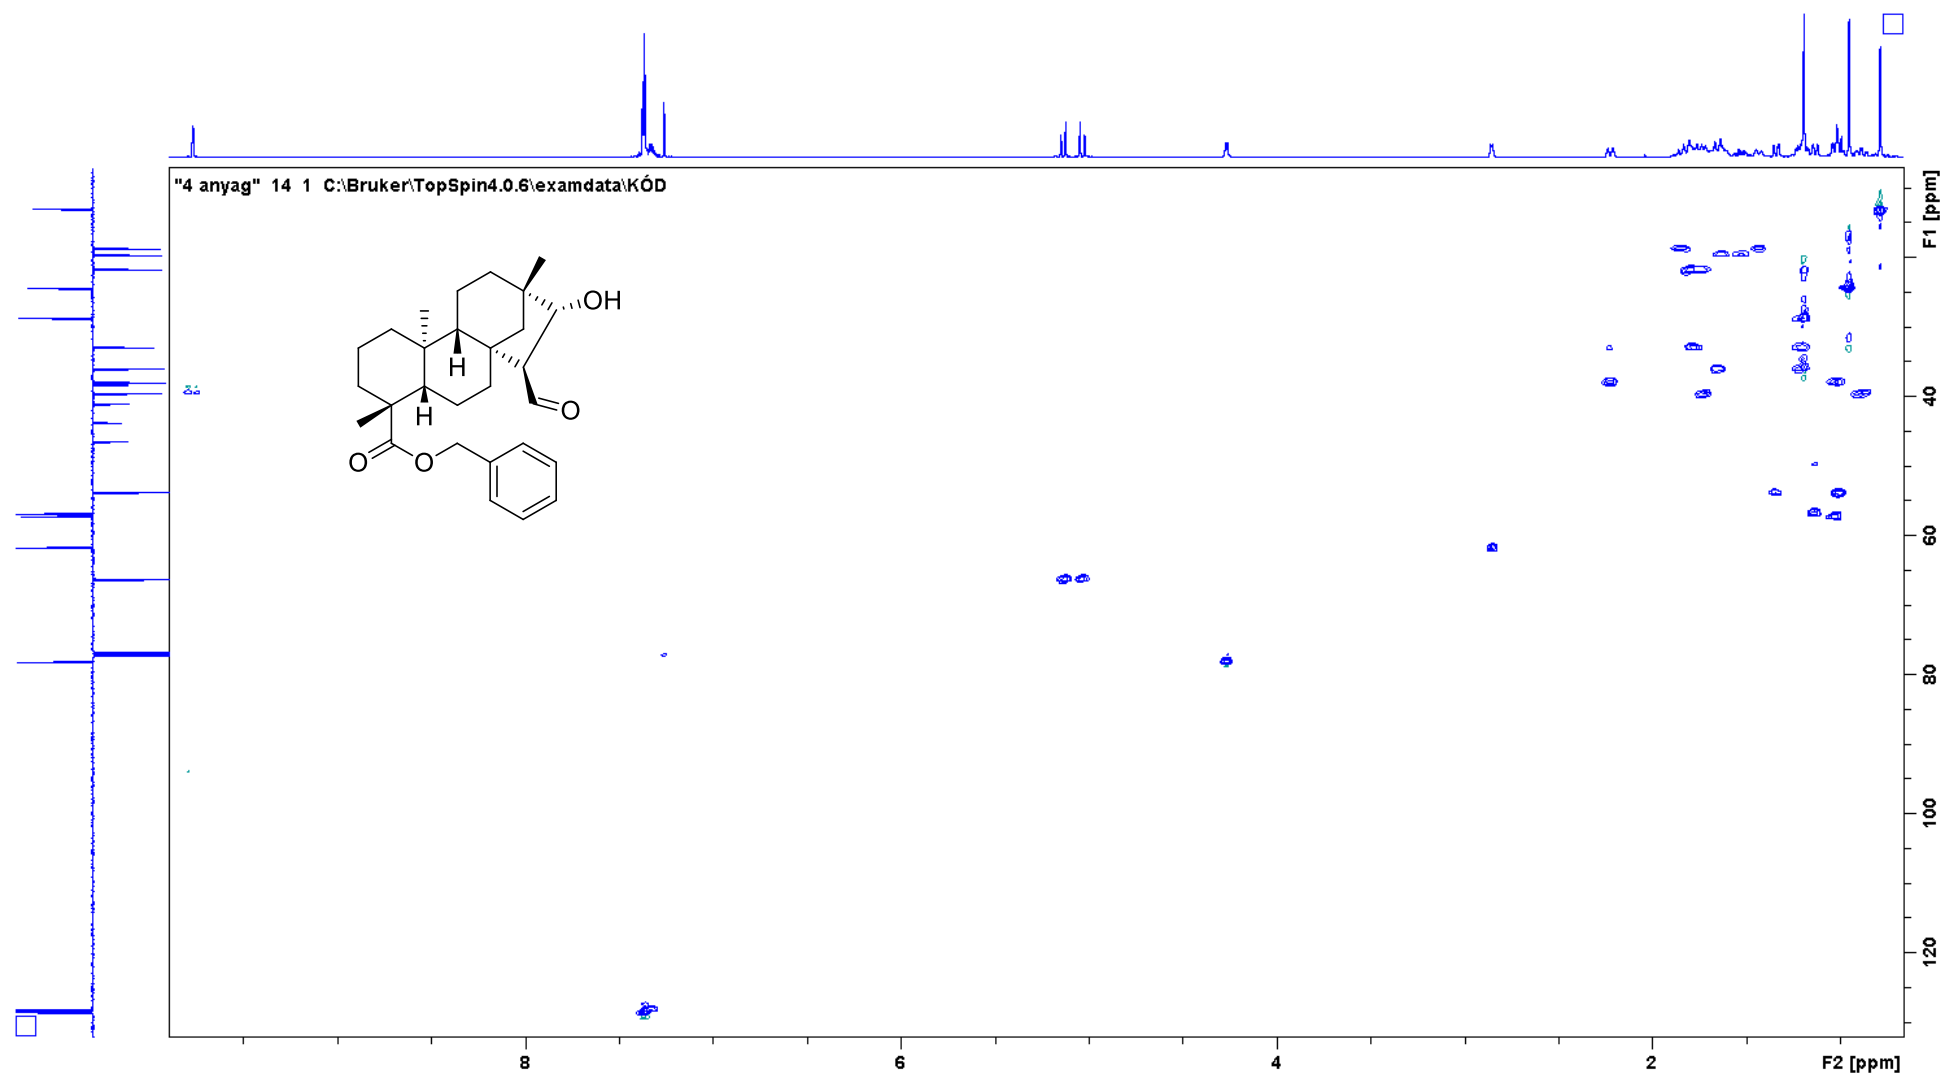



Figure S6

HMBC of compound (4*R*,4*aS*,6*aS*,7*S*,8*R*,9*S*,11*bS*)-Benzyl 7-formyl-8-hydroxy-4,9,11*b*-trimethyltetra decahydro-6*a*,9-methanocyclohepta[*a*]naphthalene-4-carboxylate (**4**):

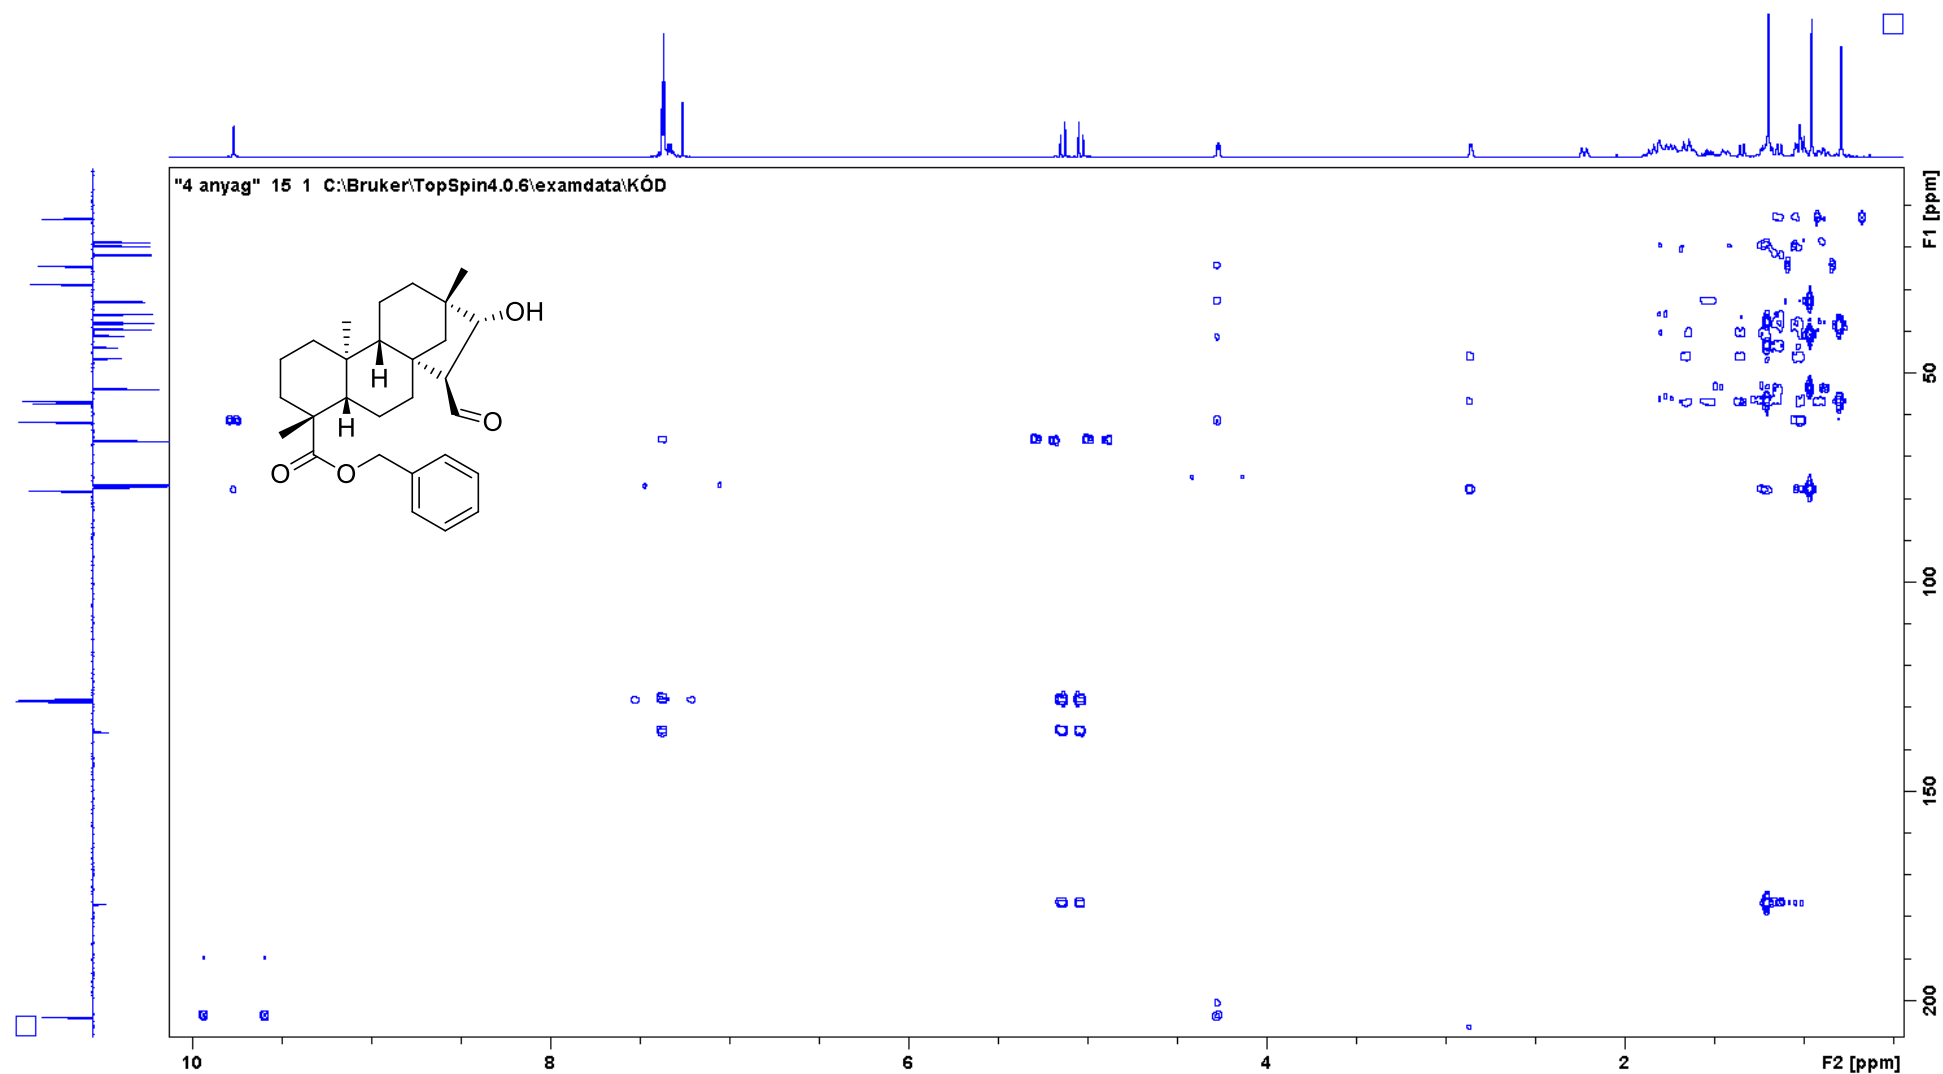

Figure S7

$^1\text{H}$ -NMR of compound (4*R*,4*aS*,6*aS*,7*R*,8*R*,9*S*,11*bS*)-Benzyl 7-(((4-fluorobenzyl)amino)methyl)-8-hydroxy-4,9,11*b*-trimethyltetradecahydro-6*a*,9-methanocyclohepta[*a*]naphthalene-4-carboxylate (**5**):

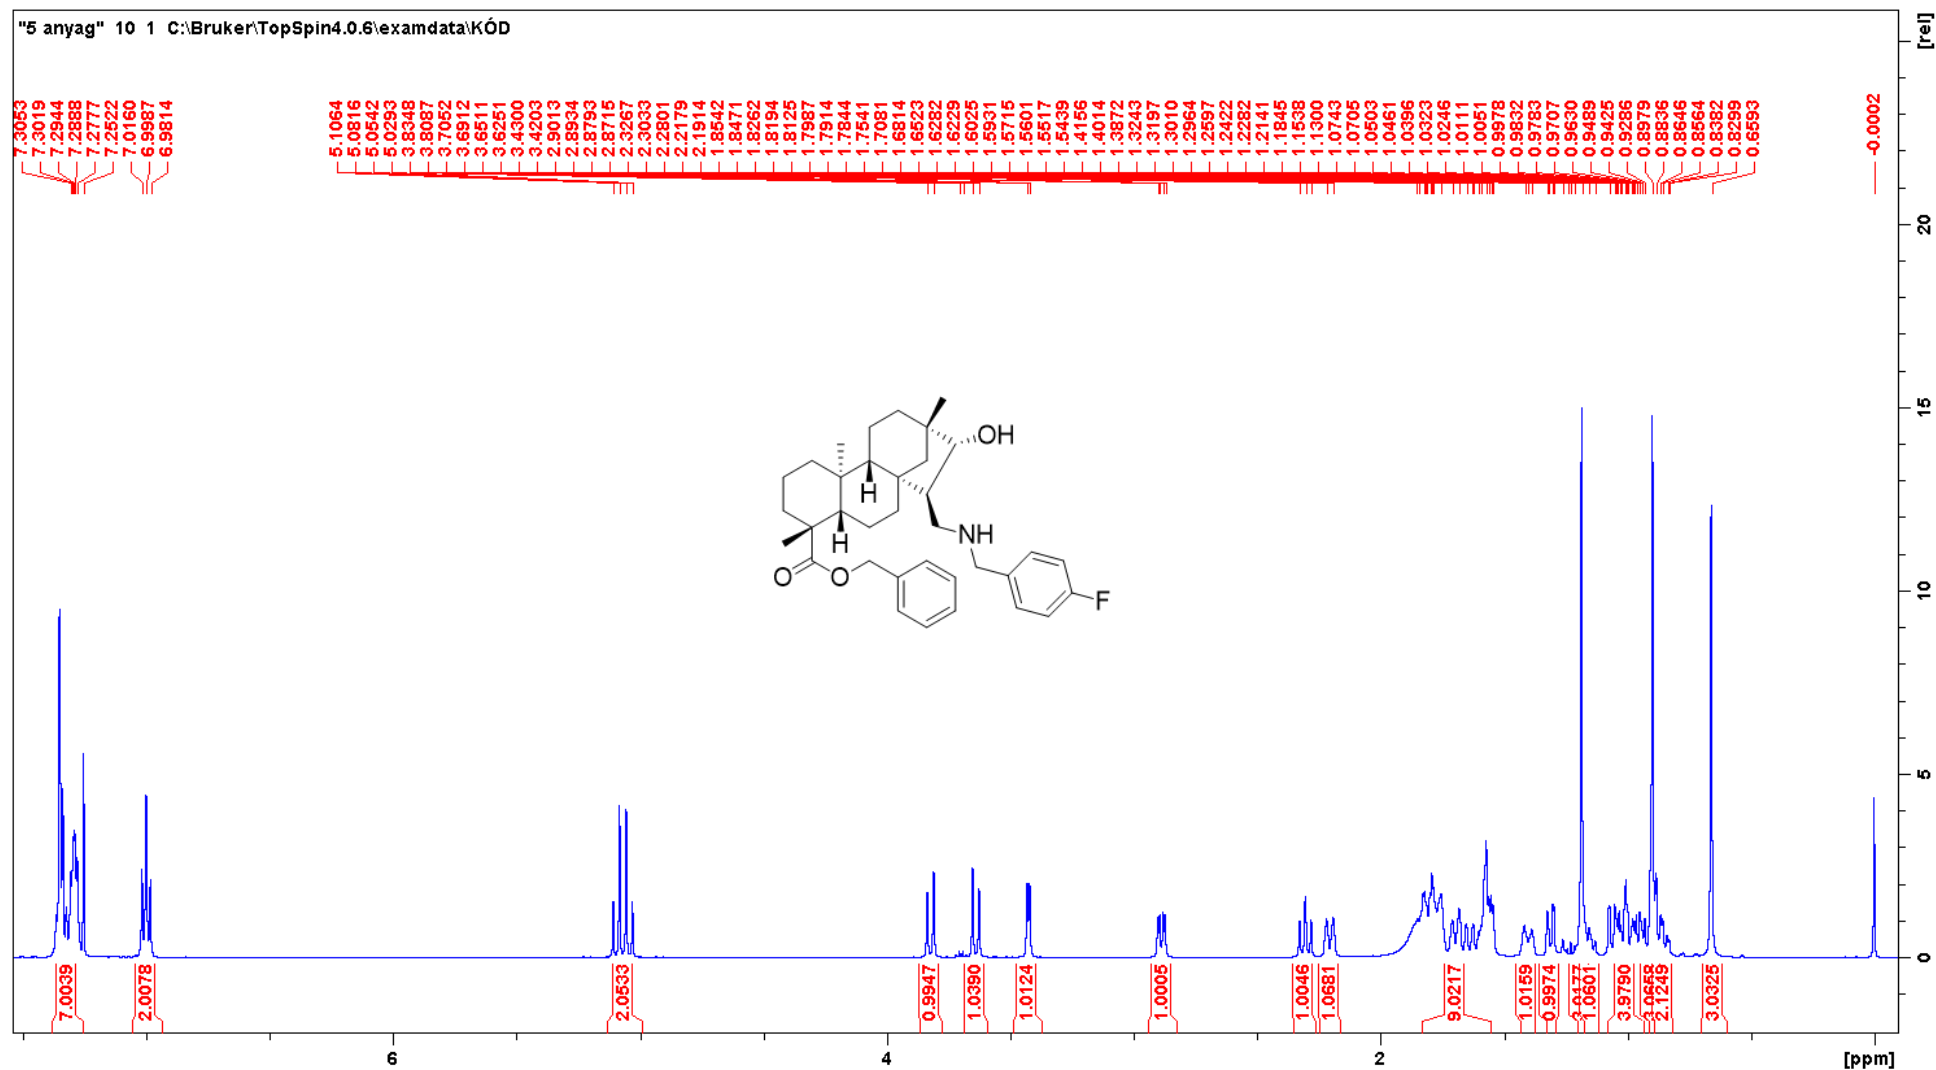

Figure S8

$^{13}\text{C}$ -NMR of compound (4*R*,4*aS*,6*aS*,7*R*,8*R*,9*S*,11*bS*)-Benzyl 7-(((4-fluorobenzyl)amino)methyl)-8-hydroxy-4,9,11*b*-trimethyltetradeca hydro-6*a*,9-methanocyclohepta[*a*]naphthalene-4-carboxylate (**5**):

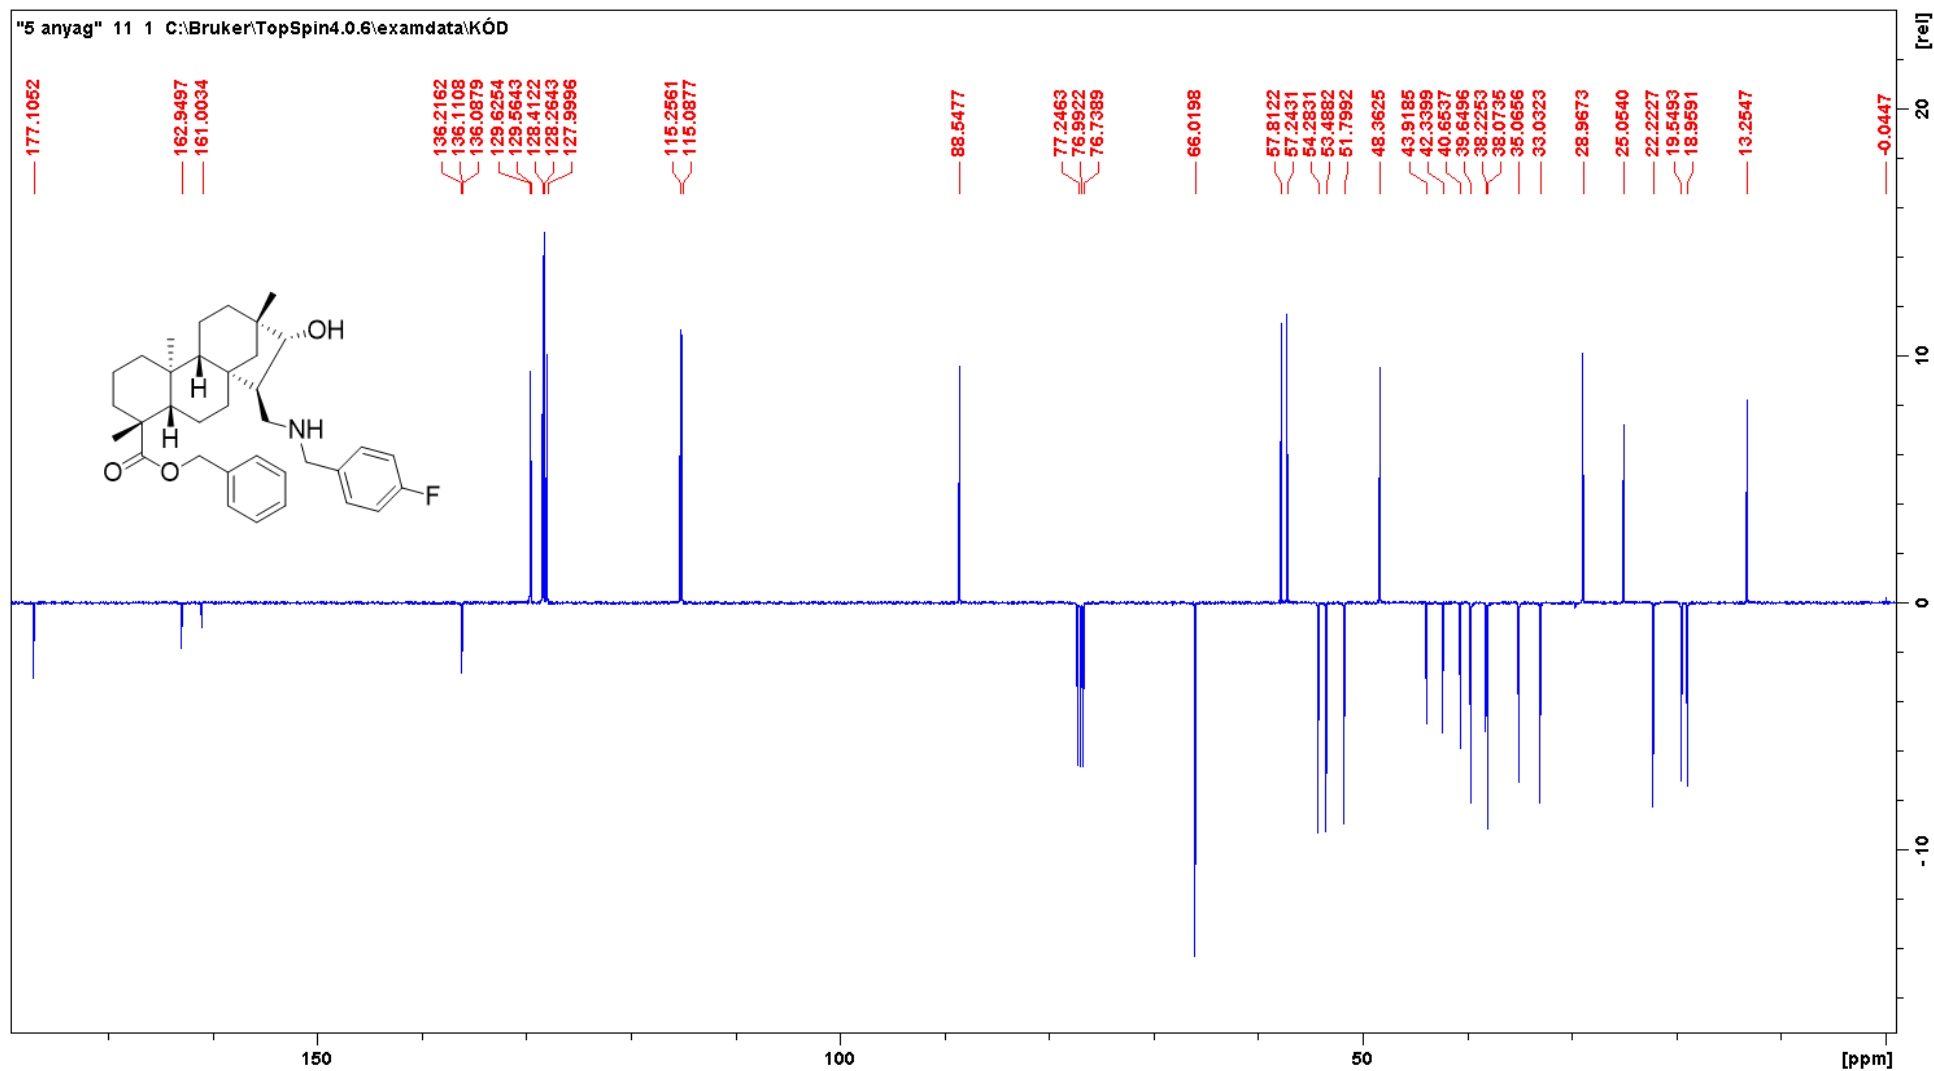

Figure S9

COSY of compound (4*R*,4*aS*,6*aS*,7*R*,8*R*,9*S*,11*bS*)-Benzyl 7-(((4-fluorobenzyl)amino)methyl)-8-hydroxy-4,9,11*b*-trimethyltetra decahydro-6*a*,9-methanocyclohepta[*a*]naphthalene-4-carboxylate (**5**):

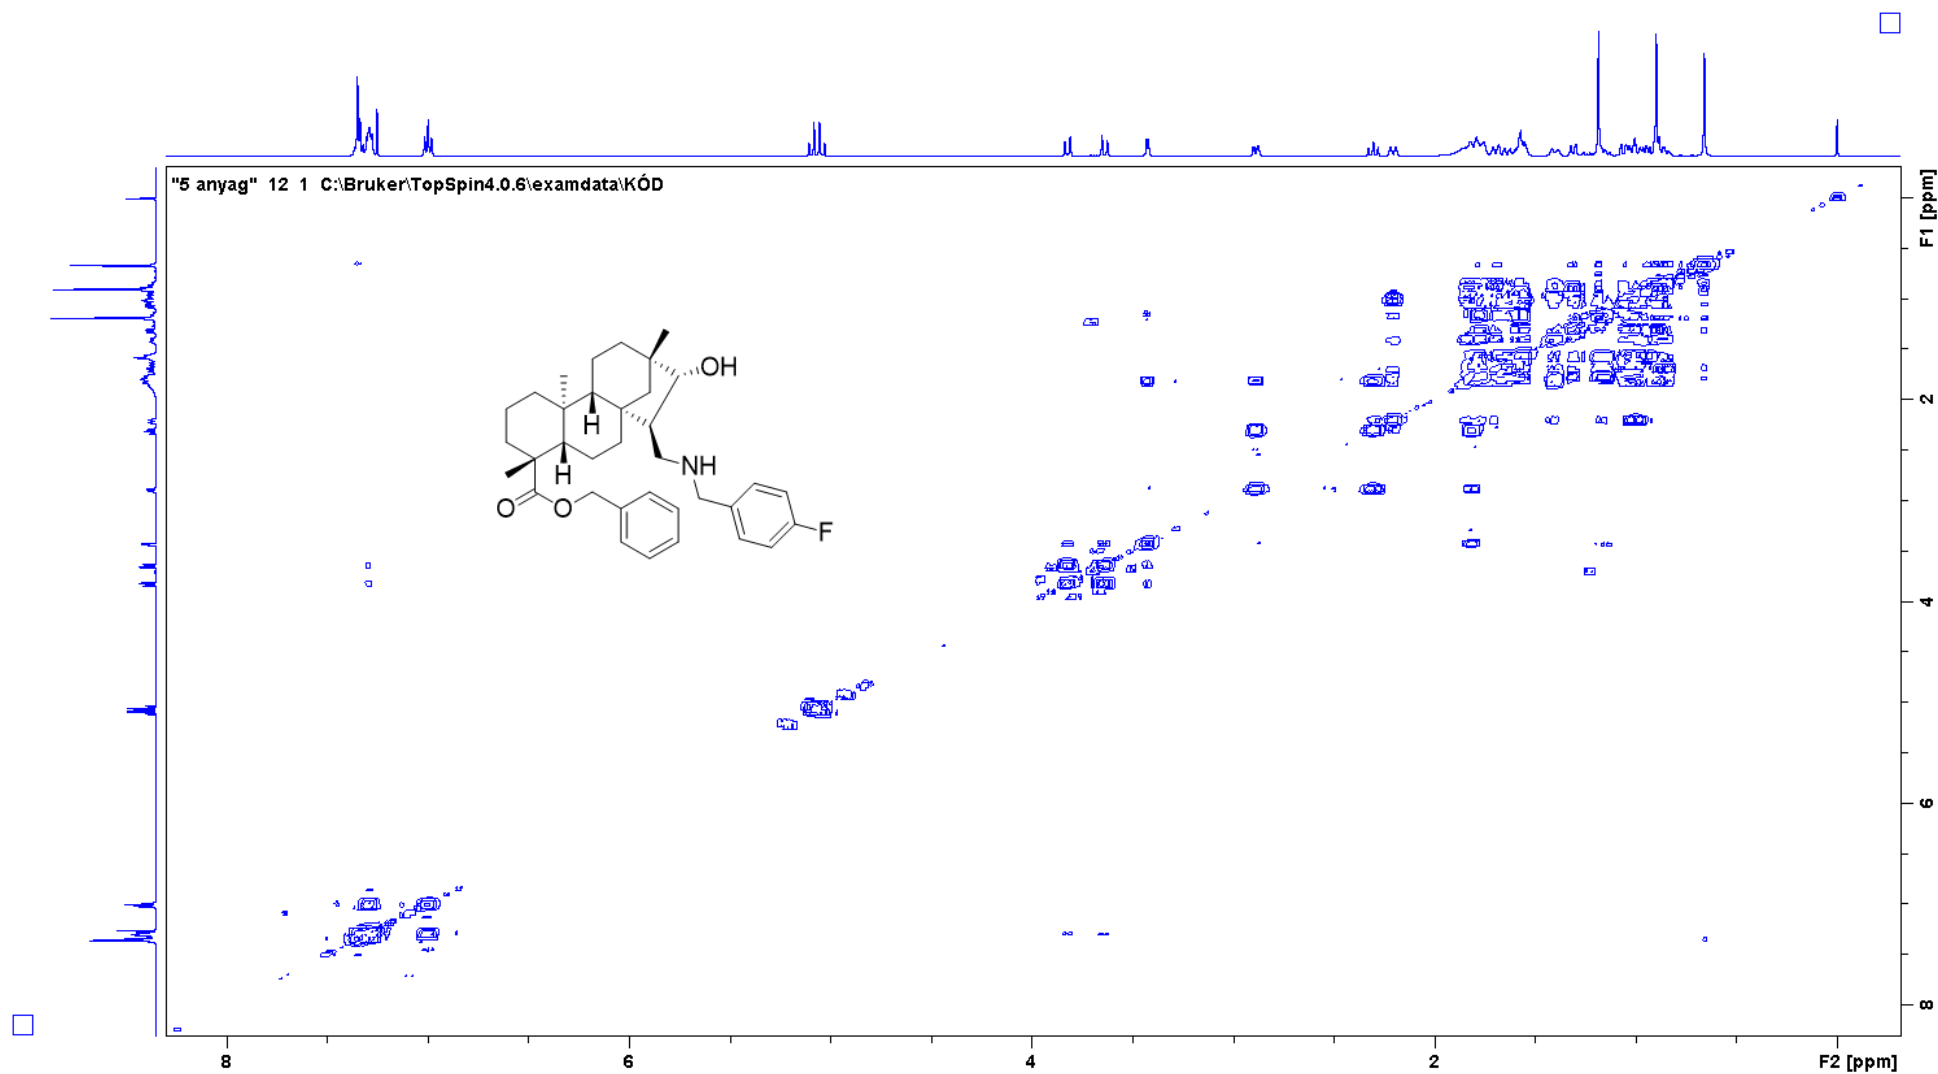

Figure S10

NOESY of compound (4*R*,4*aS*,6*aS*,7*R*,8*R*,9*S*,11*bS*)-Benzyl 7-(((4-fluorobenzyl)amino)methyl)-8-hydroxy-4,9,11*b*-trimethyltetradecahydro-6*a*,9-methanocyclohepta[*a*]naphthalene-4-carboxylate (**5**):

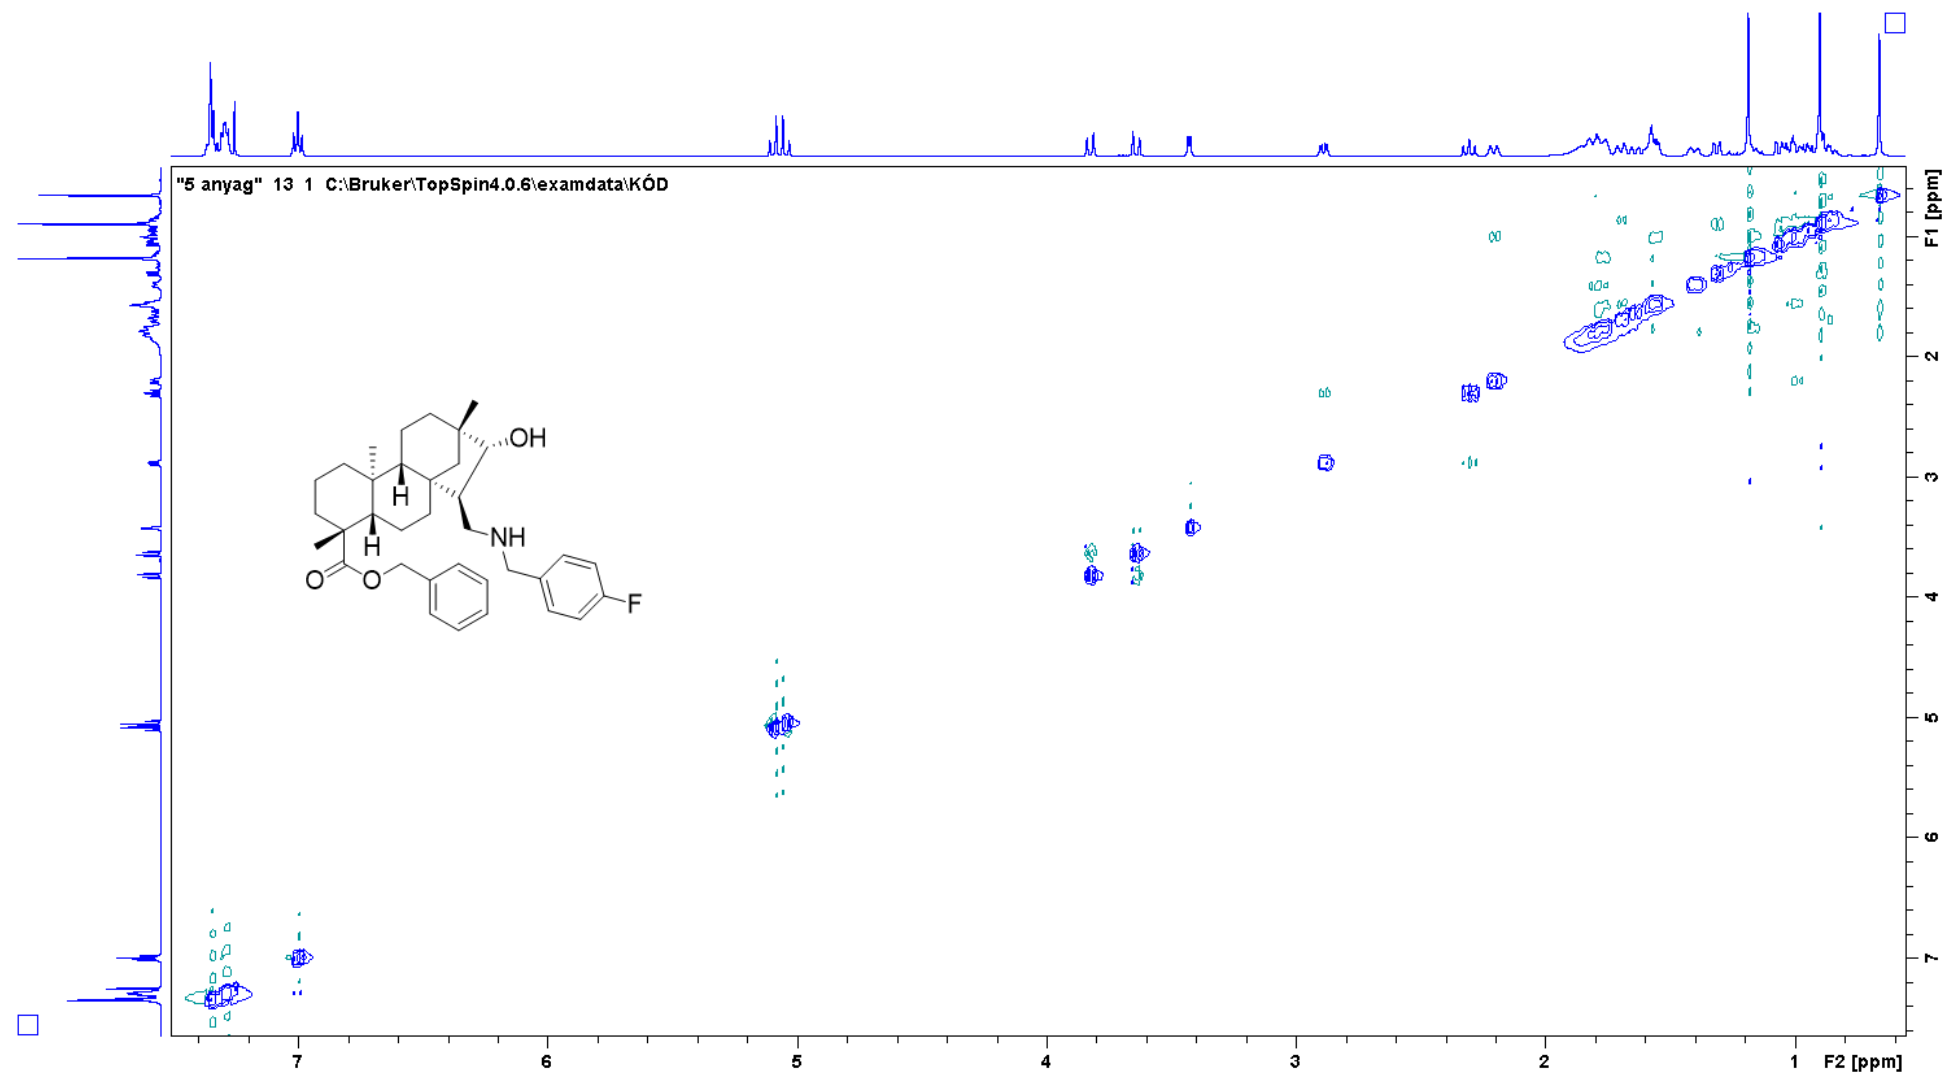

Figure S11

HSQC of compound (4*R*,4*aS*,6*aS*,7*R*,8*R*,9*S*,11*bS*)-Benzyl 7-(((4-fluorobenzyl)amino)methyl)-8-hydroxy-4,9,11*b*-trimethyltetradecahydro-6*a*,9-methanocyclohepta[*a*]naphthalene-4-carboxylate (**5**):

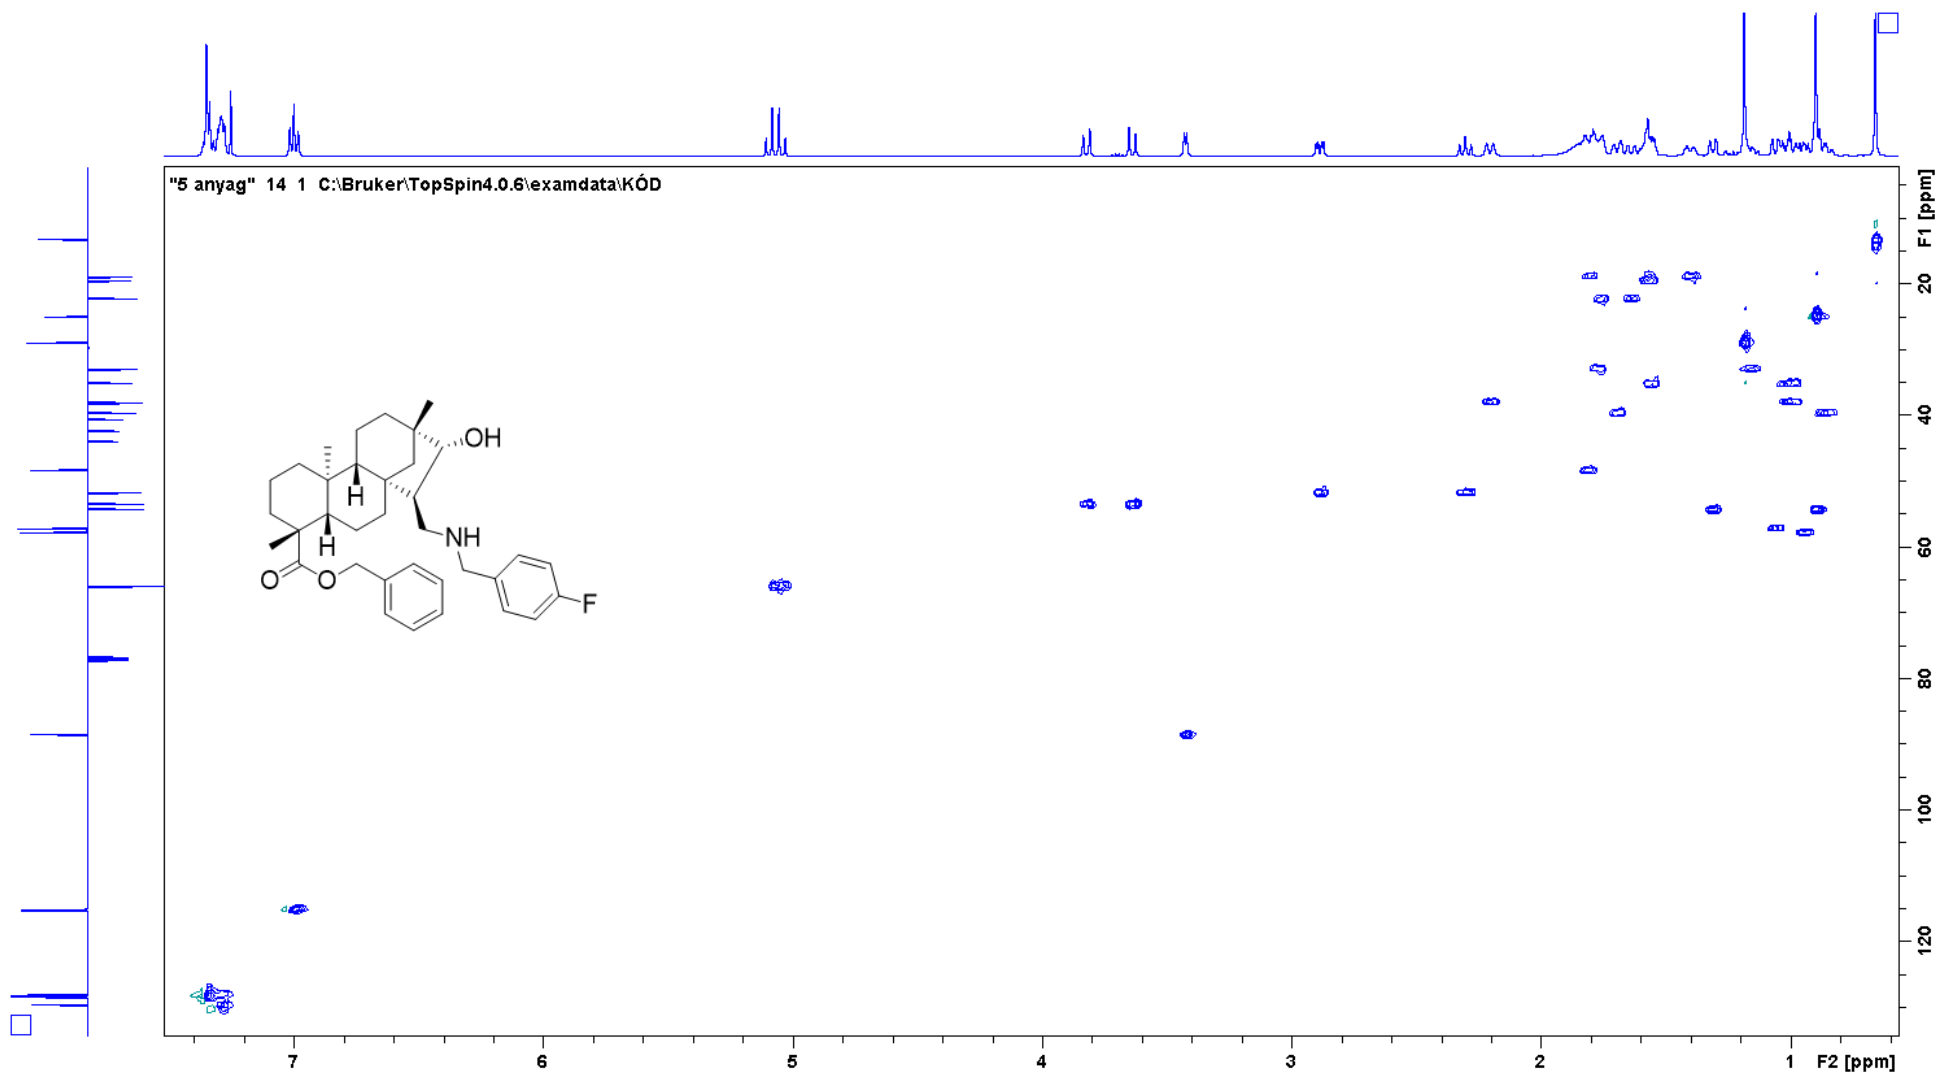

Figure S12

HMBC of compound (4*R*,4*aS*,6*aS*,7*R*,8*R*,9*S*,11*bS*)-Benzyl 7-(((4-fluorobenzyl)amino)methyl)-8-hydroxy-4,9,11*b*-trimethyltetradecahydro-6*a*,9-methanocyclohepta[*a*]naphthalene-4-carboxylate (**5**):

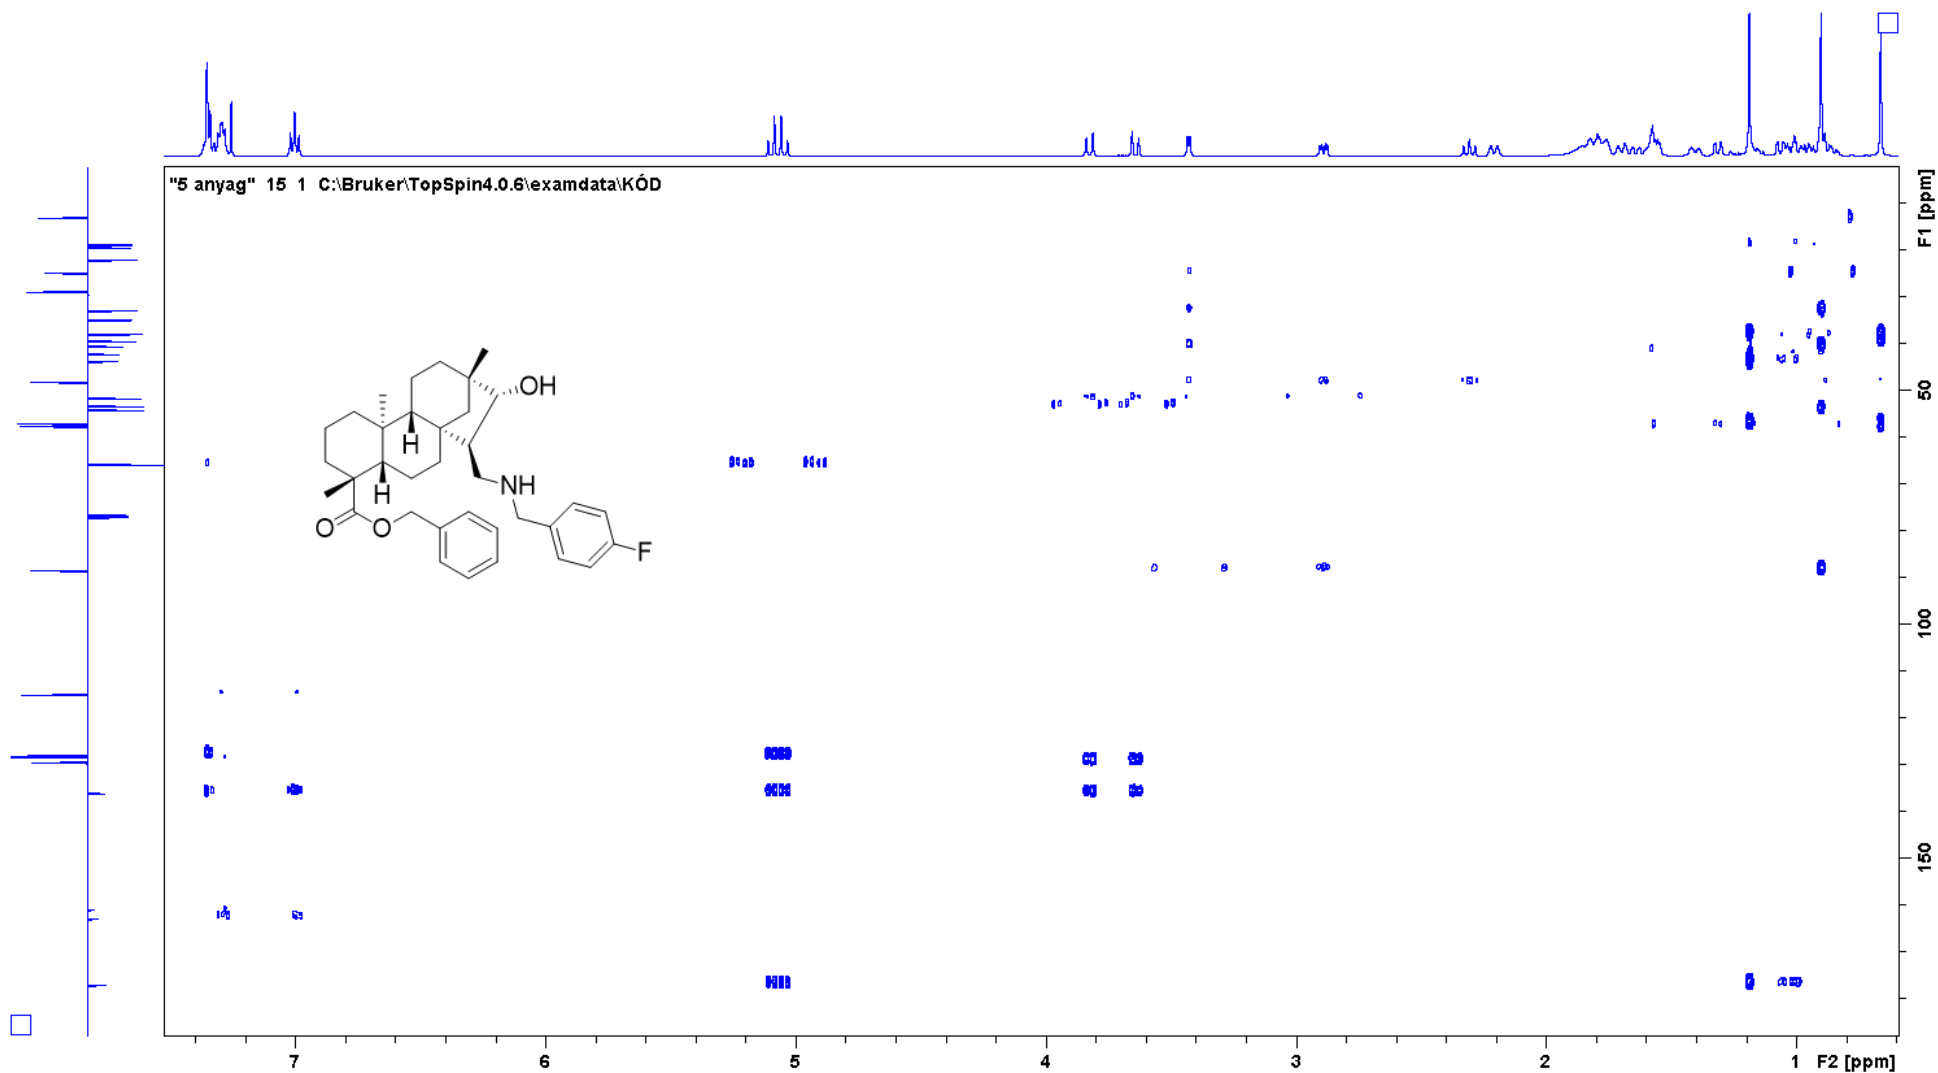

Figure S13

$^{19}\text{F}$  of compound (4*R*,4*aS*,6*aS*,7*R*,8*R*,9*S*,11*bS*)-Benzyl 7-(((4-fluorobenzyl)amino)methyl)-8-hydroxy-4,9,11*b*-trimethyltetradecahydro-6*a*,9-methanocyclohepta[*a*]naphthalene-4-carboxylate (**5**):

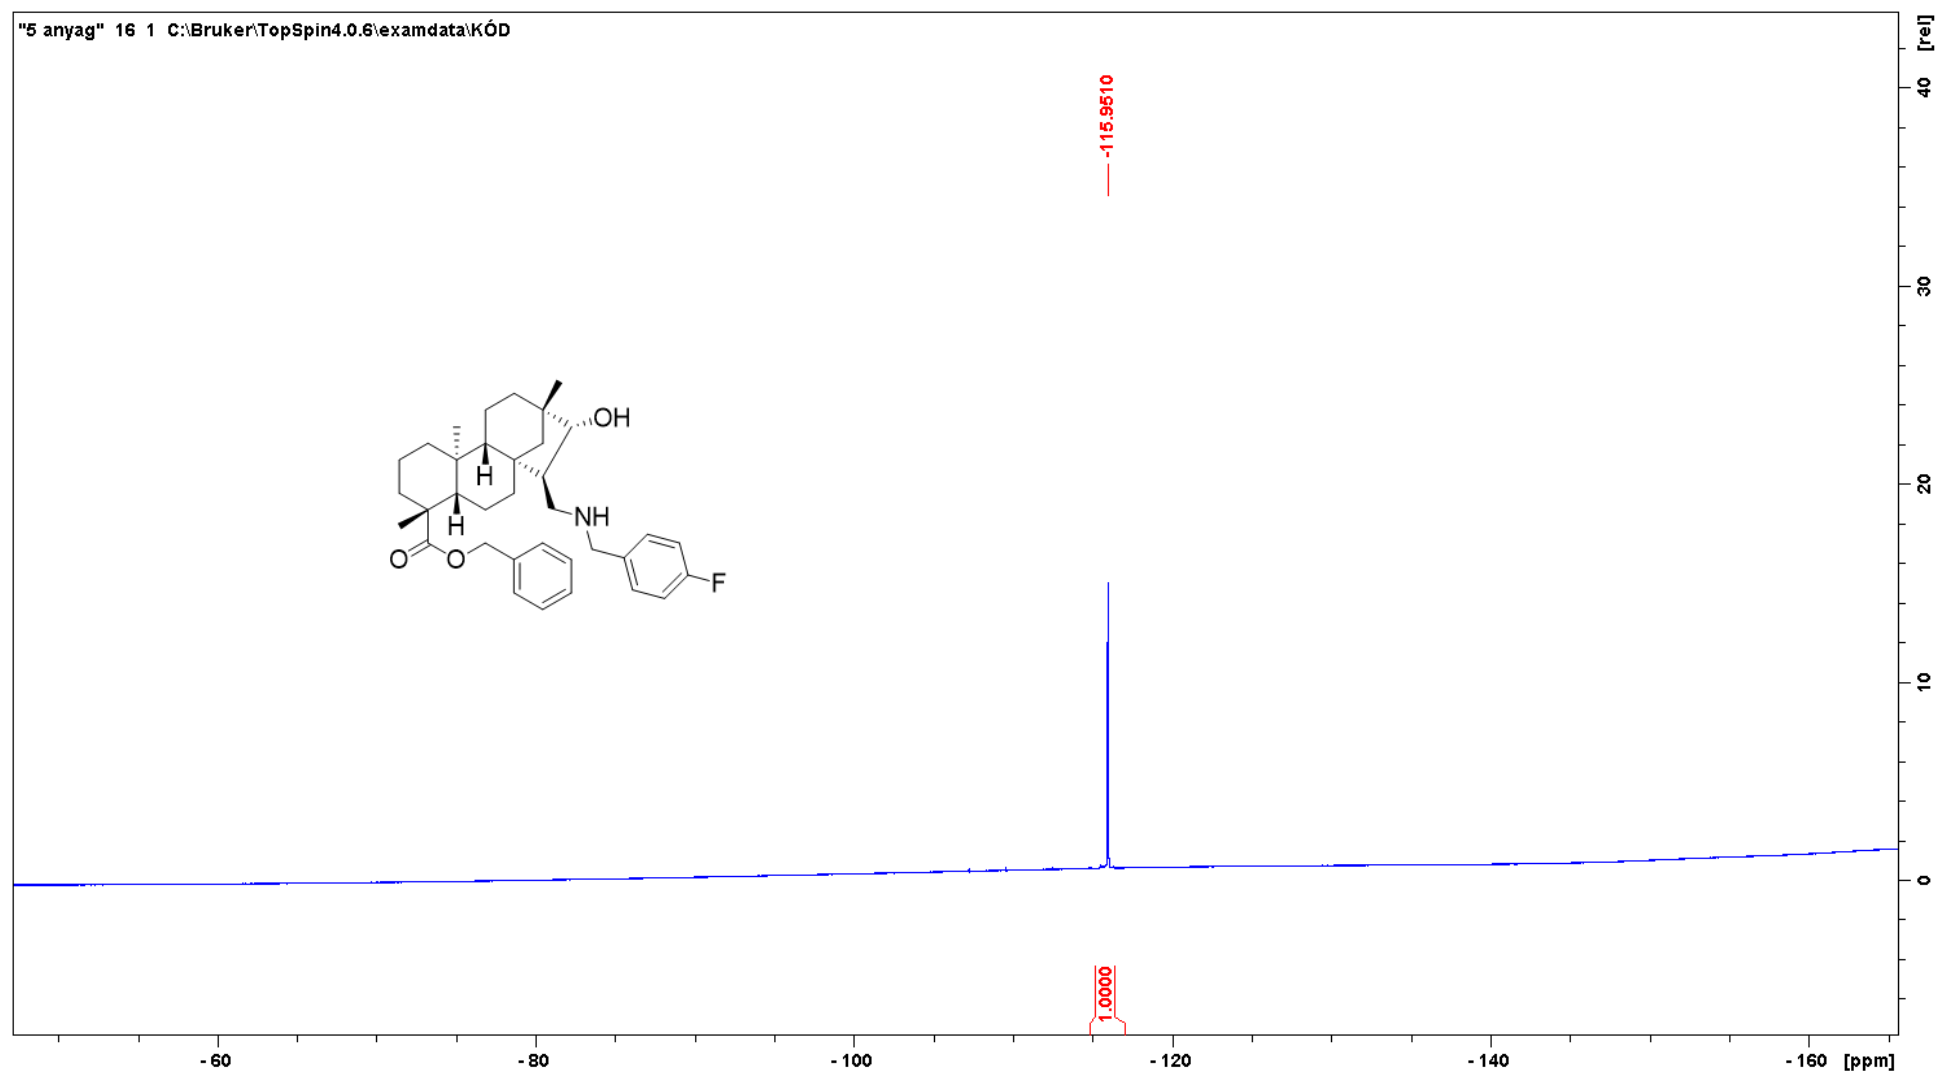



Figure S14

<sup>1</sup>H-NMR of compound (4*R*,4*aS*,6*aS*,7*R*,8*R*,9*S*,11*bS*)-Benzyl 7-(((*tert*-butoxycarbonyl)(4-fluorobenzyl)amino)methyl)-8-hydroxy-4,9,11*b*-trimethyltetradecahydro-6*a*,9-methanocyclohepta[*a*]naphthalene-4-carboxylate (**6**):

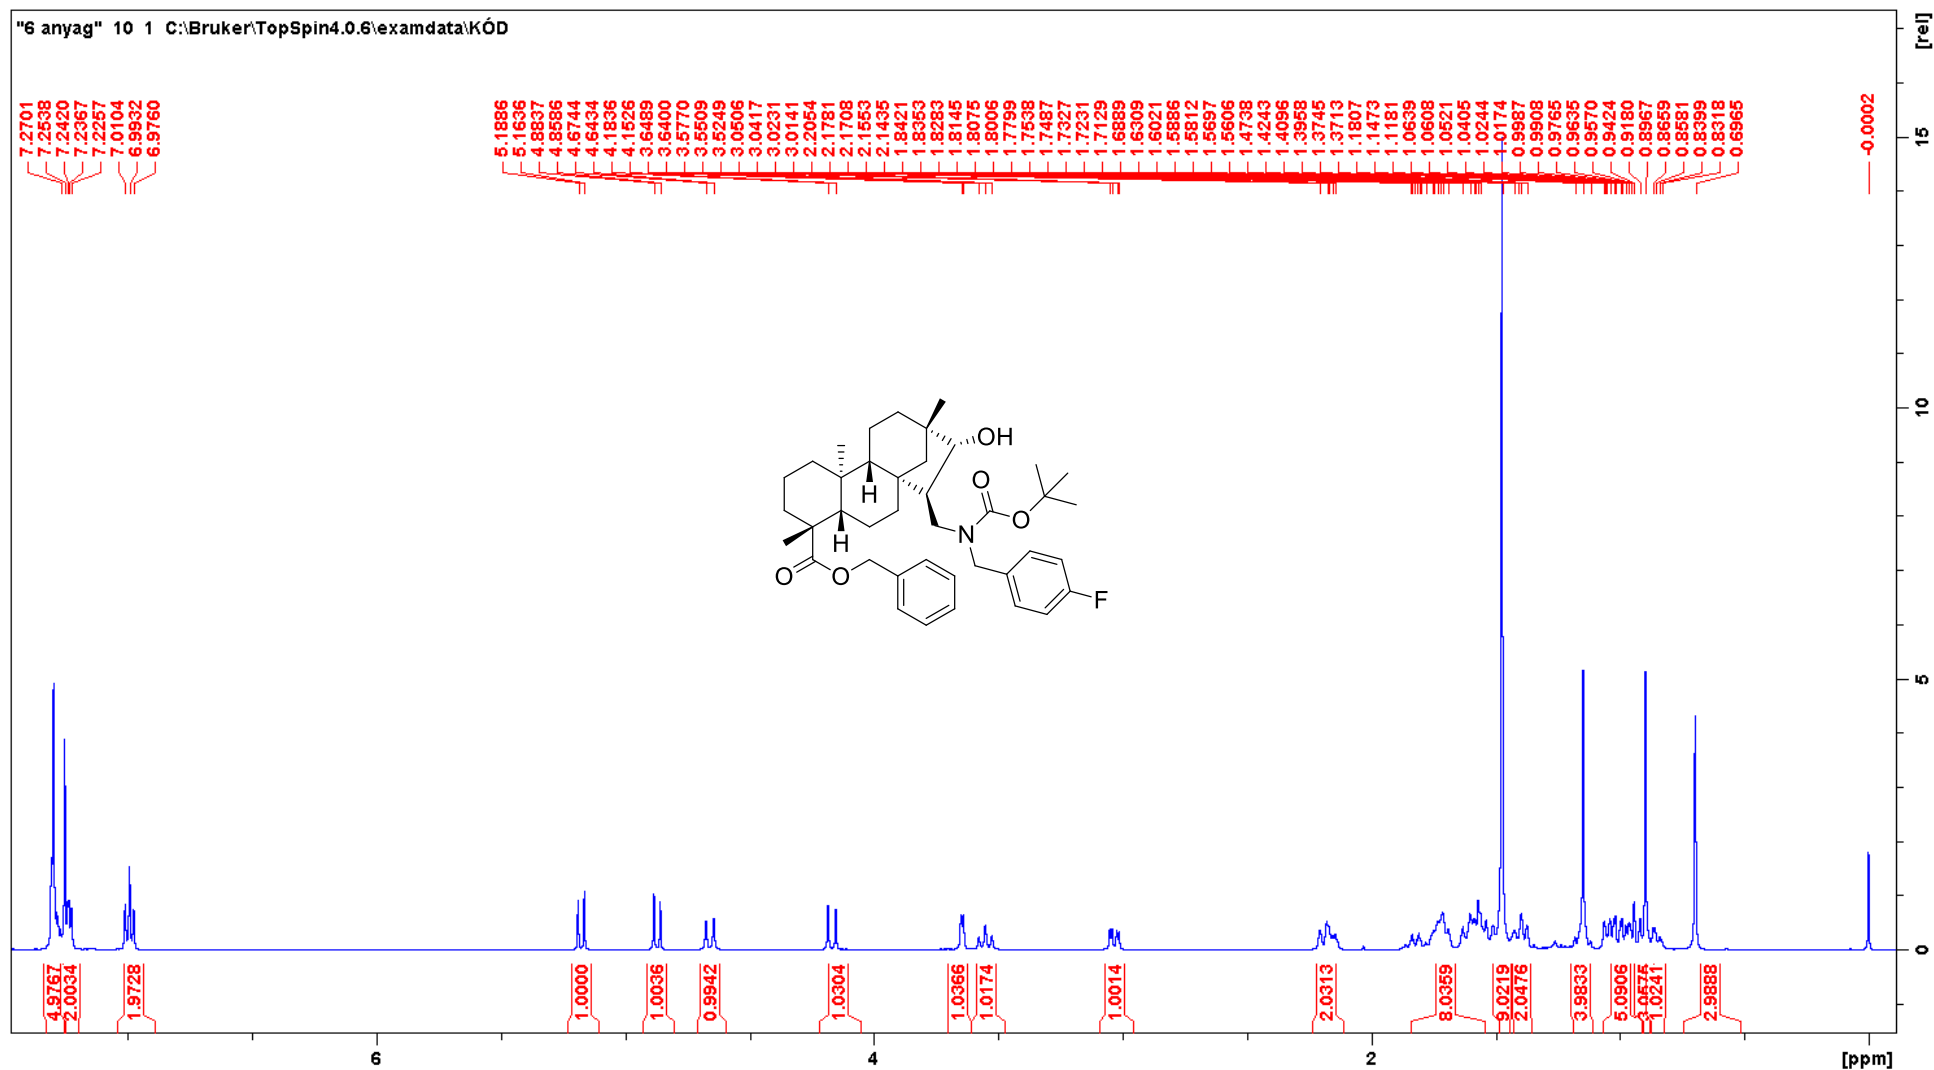

Figure S15

$^{13}\text{C}$ -NMR of compound (4*R*,4*aS*,6*aS*,7*R*,8*R*,9*S*,11*bS*)-Benzyl 7-(((*tert*-butoxycarbonyl)(4-fluorobenzyl)amino)methyl)-8-hydroxy-4,9,11*b*-trimethyltetradecahydro-6*a*,9-methanocyclohepta[*a*]naphthalene-4-carboxylate (**6**):

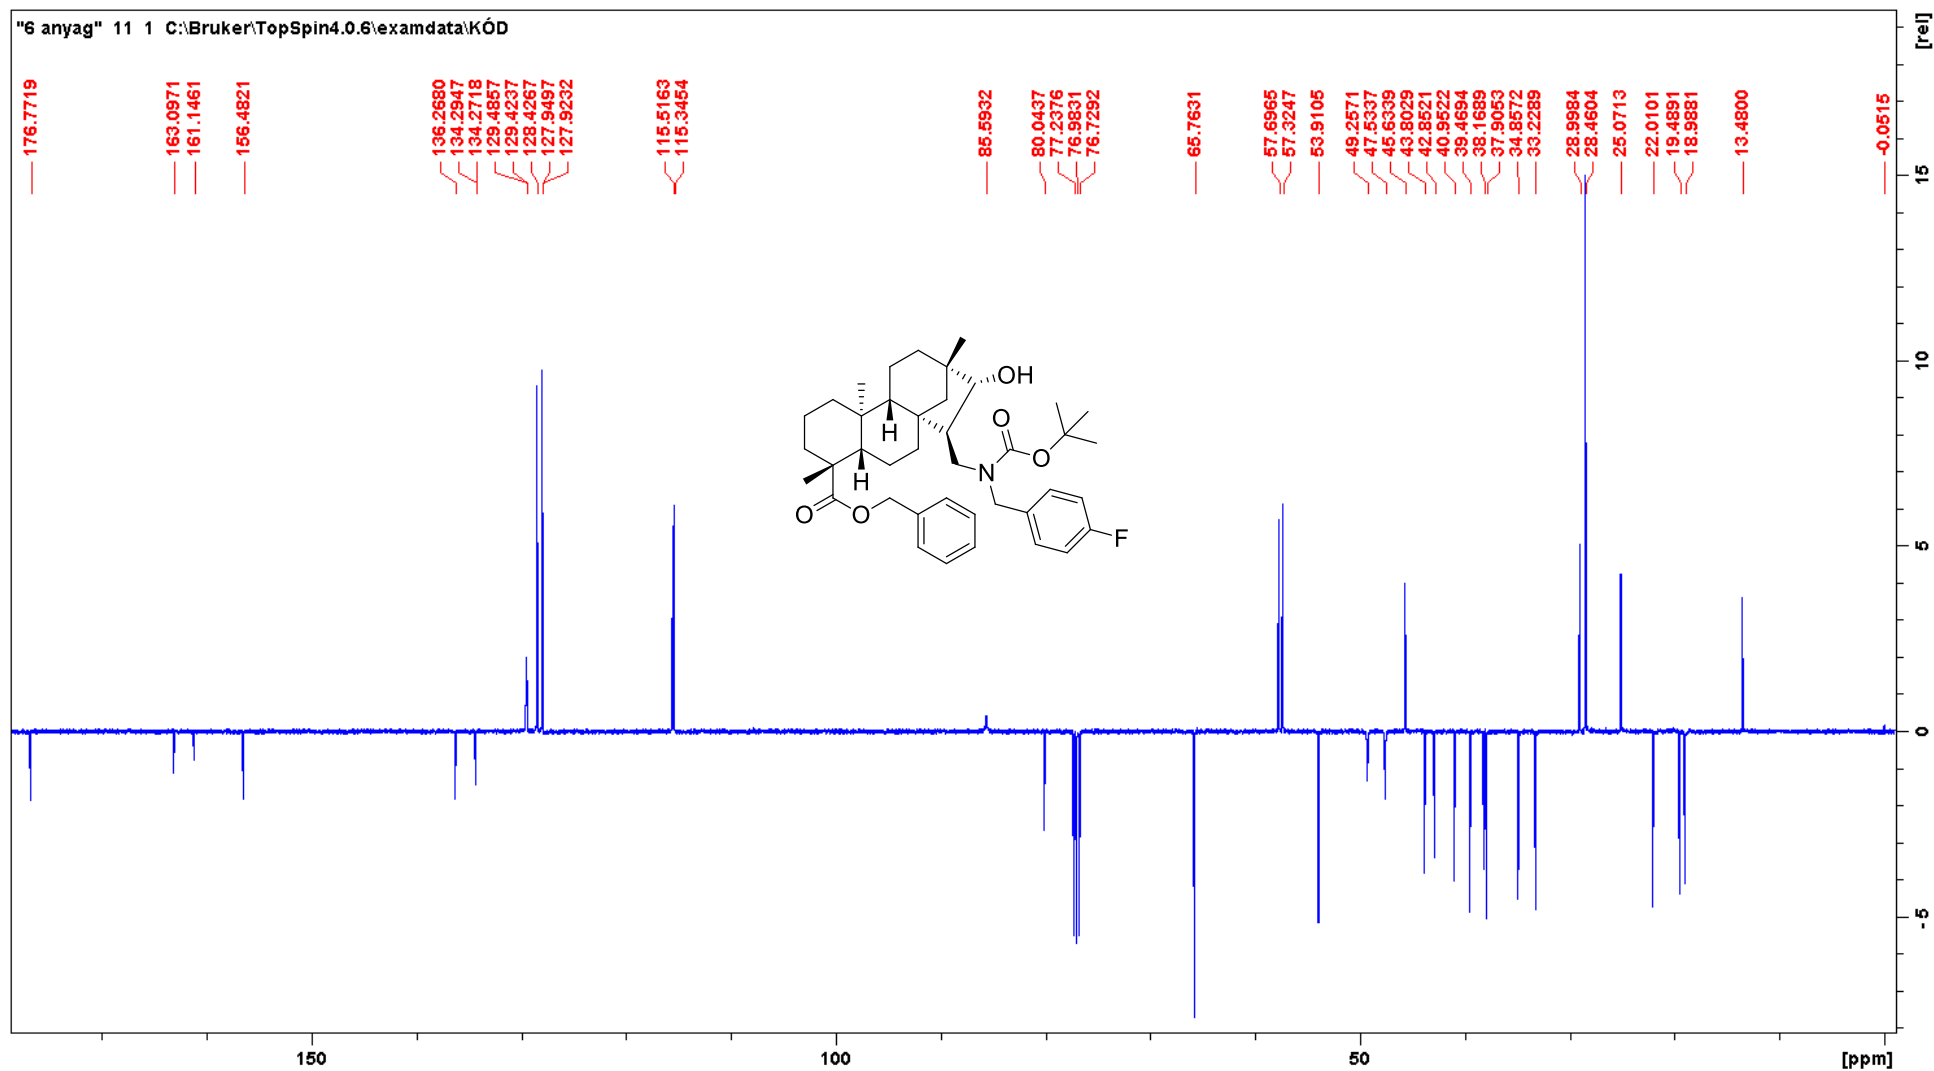

Figure S16

COSY of compound (4*R*,4*aS*,6*aS*,7*R*,8*R*,9*S*,11*bS*)-Benzyl 7-(((*tert*-butoxycarbonyl)(4-fluorobenzyl)amino)methyl)-8-hydroxy-4,9,11*b*-trimethyltetradecahydro-6*a*,9-methanocyclohepta[*a*]naphthalene-4-carboxylate (**6**):

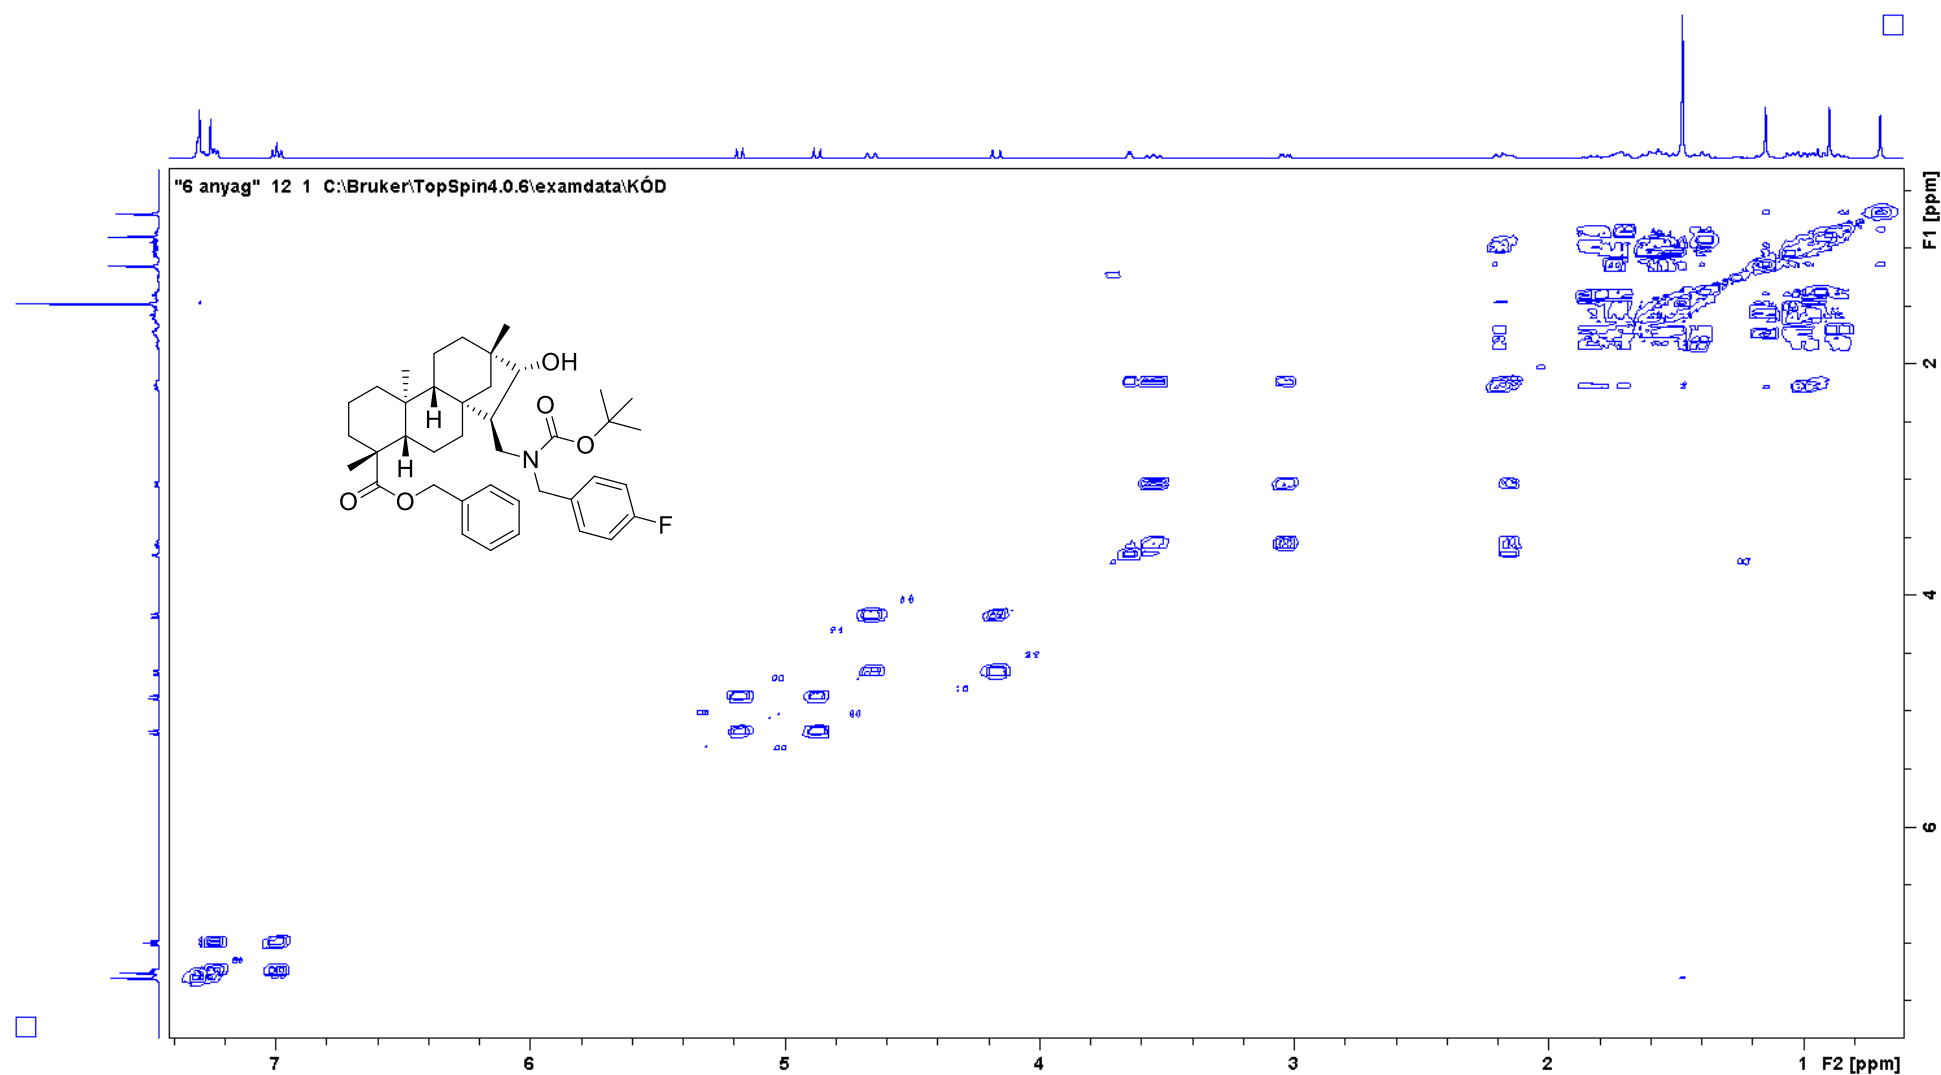

Figure S17

NOESY of compound (4*R*,4*aS*,6*aS*,7*R*,8*R*,9*S*,11*bS*)-Benzyl 7-(((*tert*-butoxycarbonyl)(4-fluorobenzyl)amino)methyl)-8-hydroxy-4,9,11*b*-trimethyltetradecahydro-6*a*,9-methanocyclohepta[*a*]naphthalene-4-carboxylate (**6**):

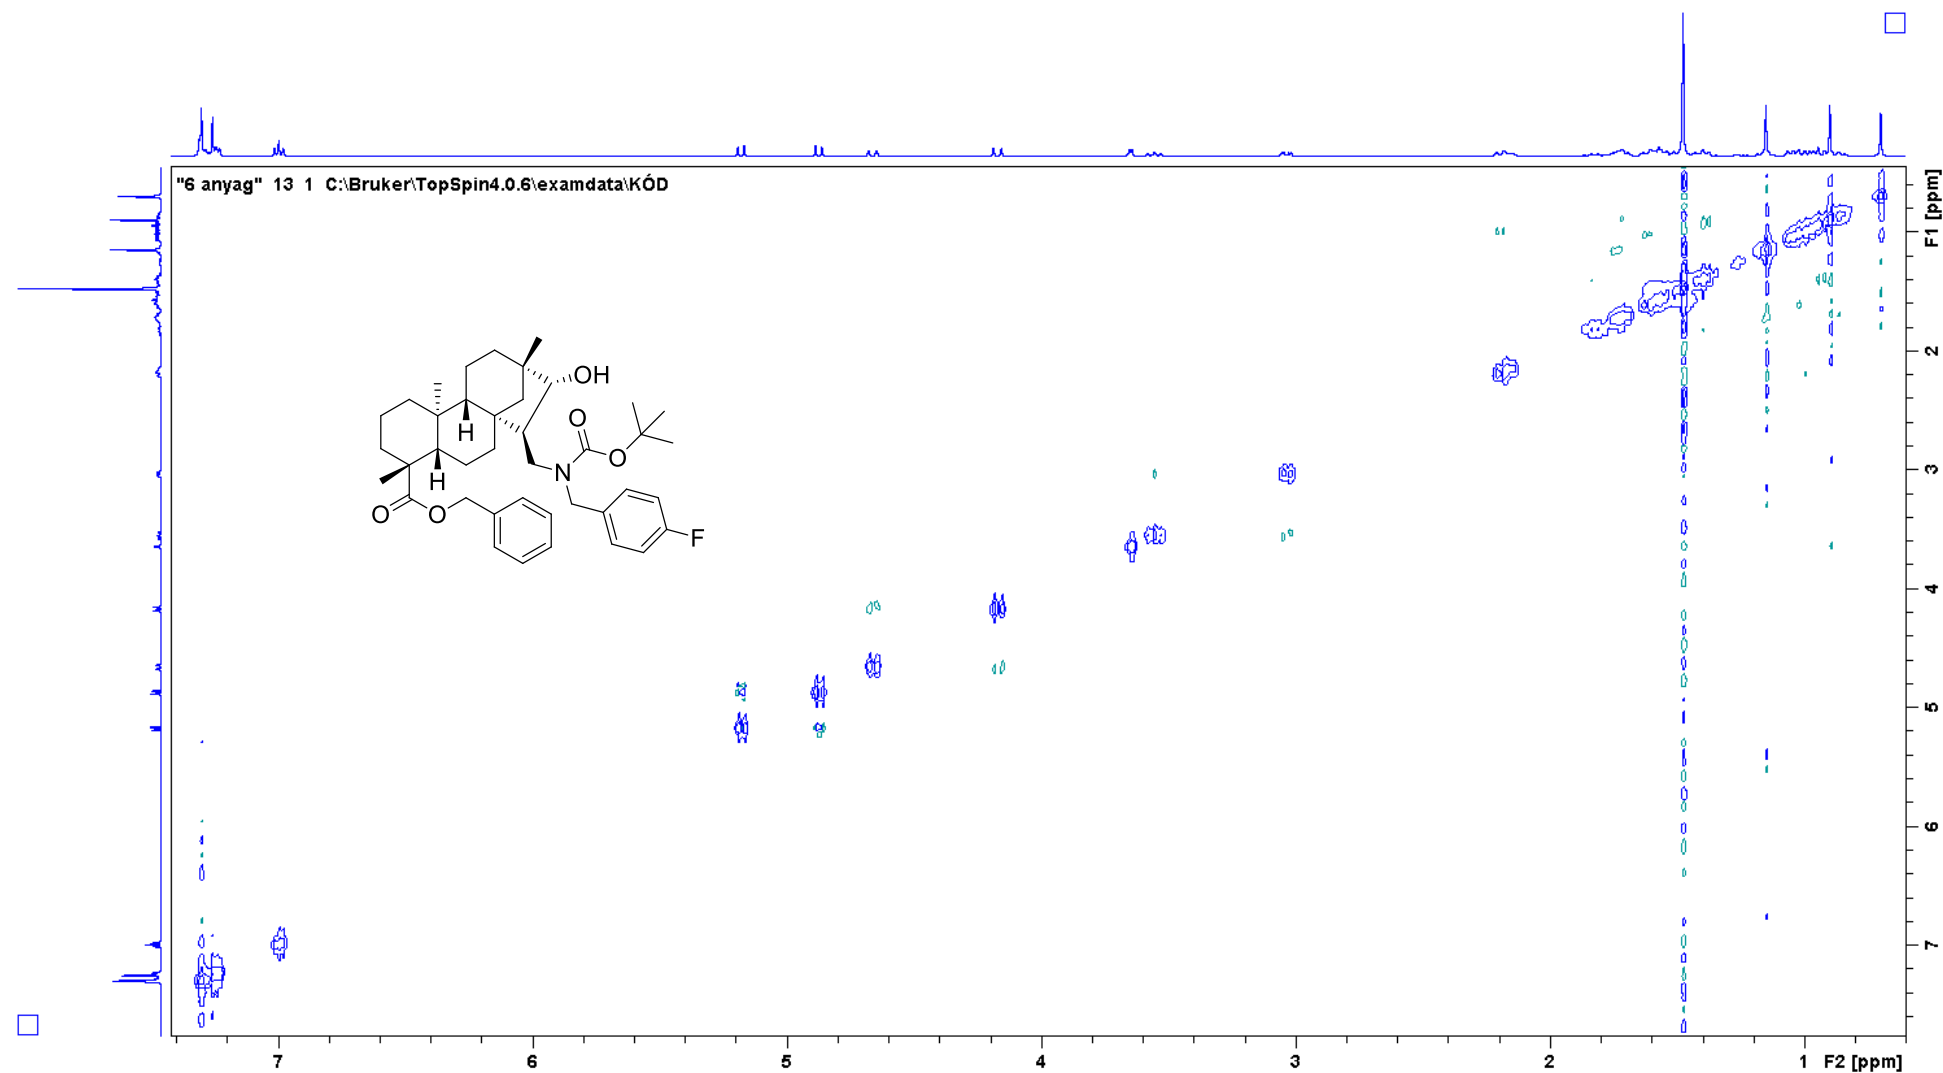

Figure S18

HSQC of compound (4*R*,4*aS*,6*aS*,7*R*,8*R*,9*S*,11*bS*)-Benzyl 7-(((*tert*-butoxycarbonyl)(4-fluorobenzyl)amino)methyl)-8-hydroxy-4,9,11*b*-trimethyltetradecahydro-6*a*,9-methanocyclohepta[*a*]naphthalene-4-carboxylate (**6**):

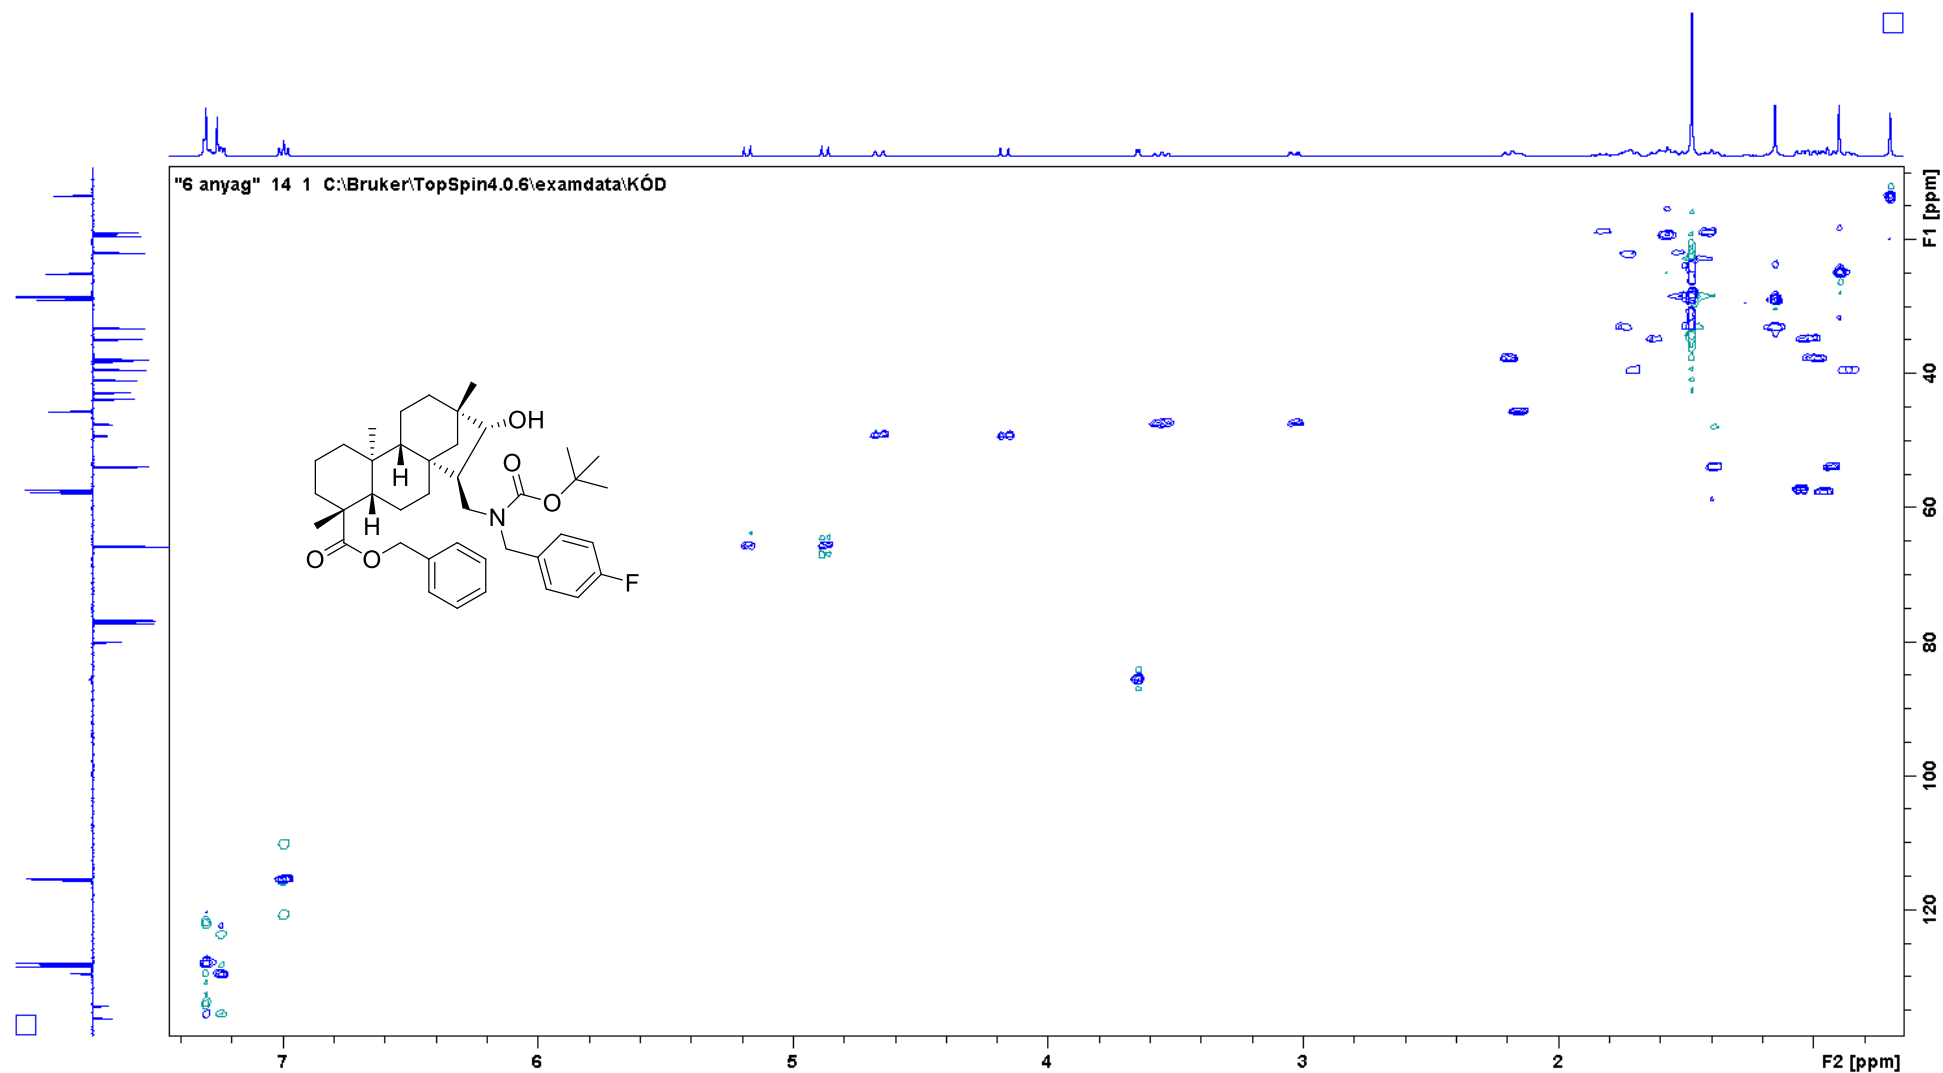

Figure S19

HMBC of compound (4*R*,4*aS*,6*aS*,7*R*,8*R*,9*S*,11*bS*)-Benzyl 7-(((*tert*-butoxycarbonyl)(4-fluorobenzyl)amino)methyl)-8-hydroxy-4,9,11*b*-trimethyltetradecahydro-6*a*,9-methanocyclohepta[*a*]naphthalene-4-carboxylate (**6**):

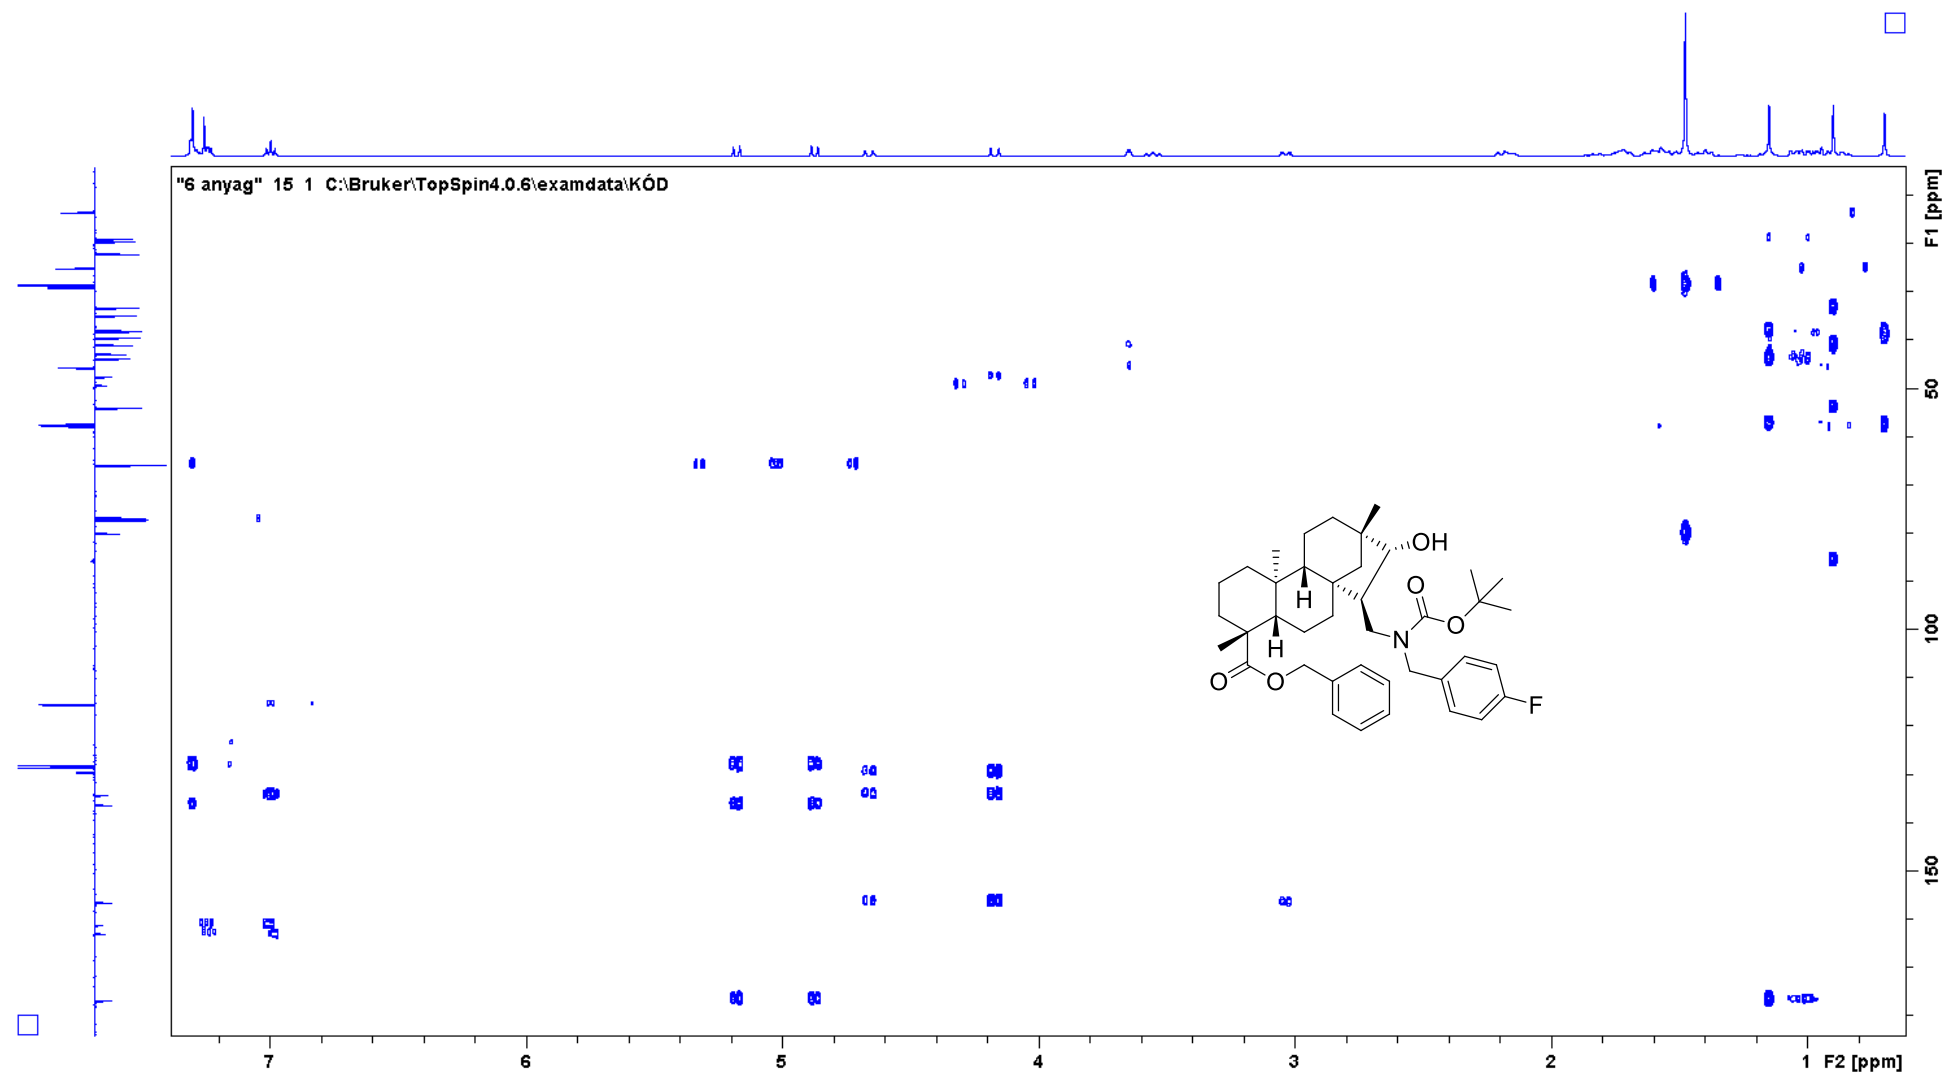

Figure S20

$^{19}\text{F}$ -NMR of compound (4*R*,4*aS*,6*aS*,7*R*,8*R*,9*S*,11*bS*)-Benzyl 7-(((*tert*-butoxycarbonyl)(4-fluorobenzyl)amino)methyl)-8-hydroxy-4,9,11*b*-trimethyltetradecahydro-6*a*,9-methanocyclohepta[*a*]naphthalene-4-carboxylate (**6**):

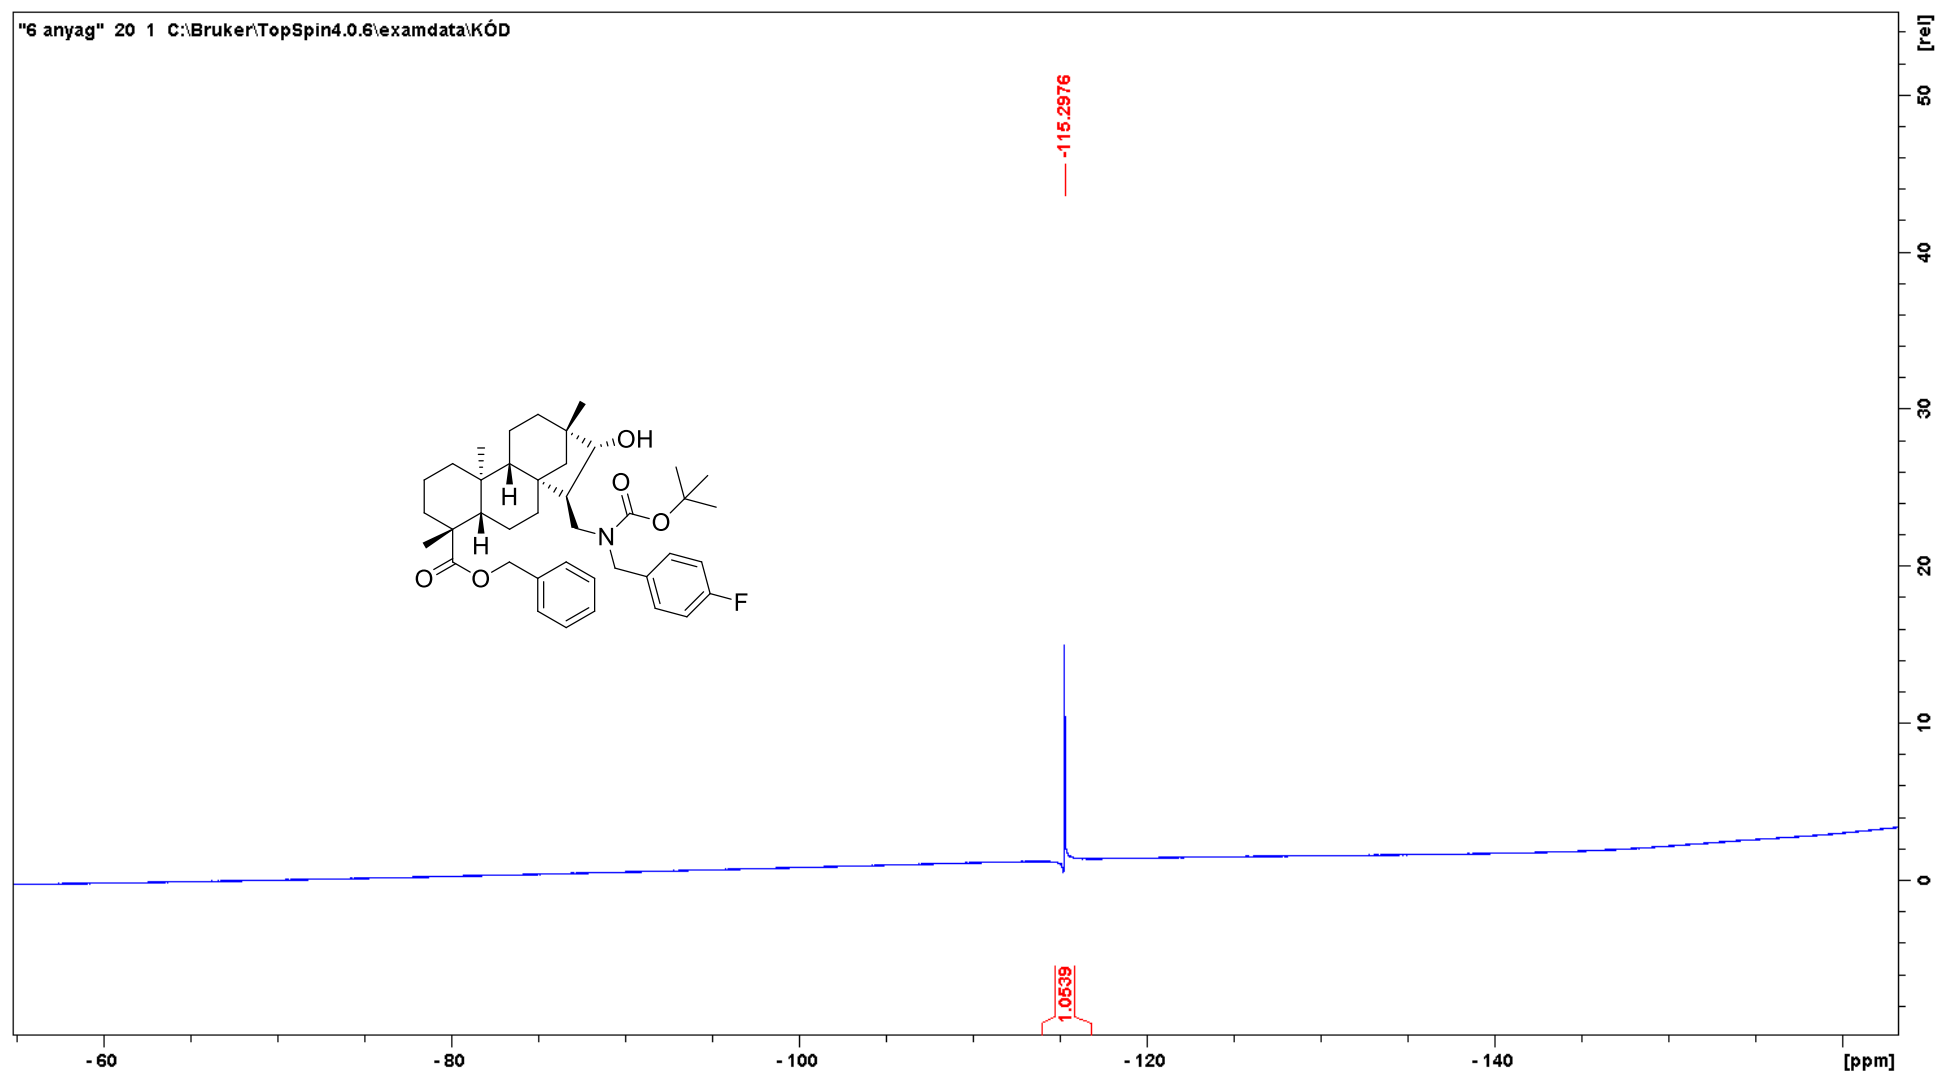

Figure S21

<sup>1</sup>H-NMR of compound (4*R*,4*aS*,6*aS*,7*R*,8*R*,9*S*,11*bS*)-7-(((*Tert*-butoxycarbonyl)(4-fluorobenzyl)amino)methyl)-8-hydroxy-4,9,11*b*-trimethyltetradecahydro-6*a*,9-methanocyclohepta[*a*]naphthalene-4-carboxylic acid (**7**):

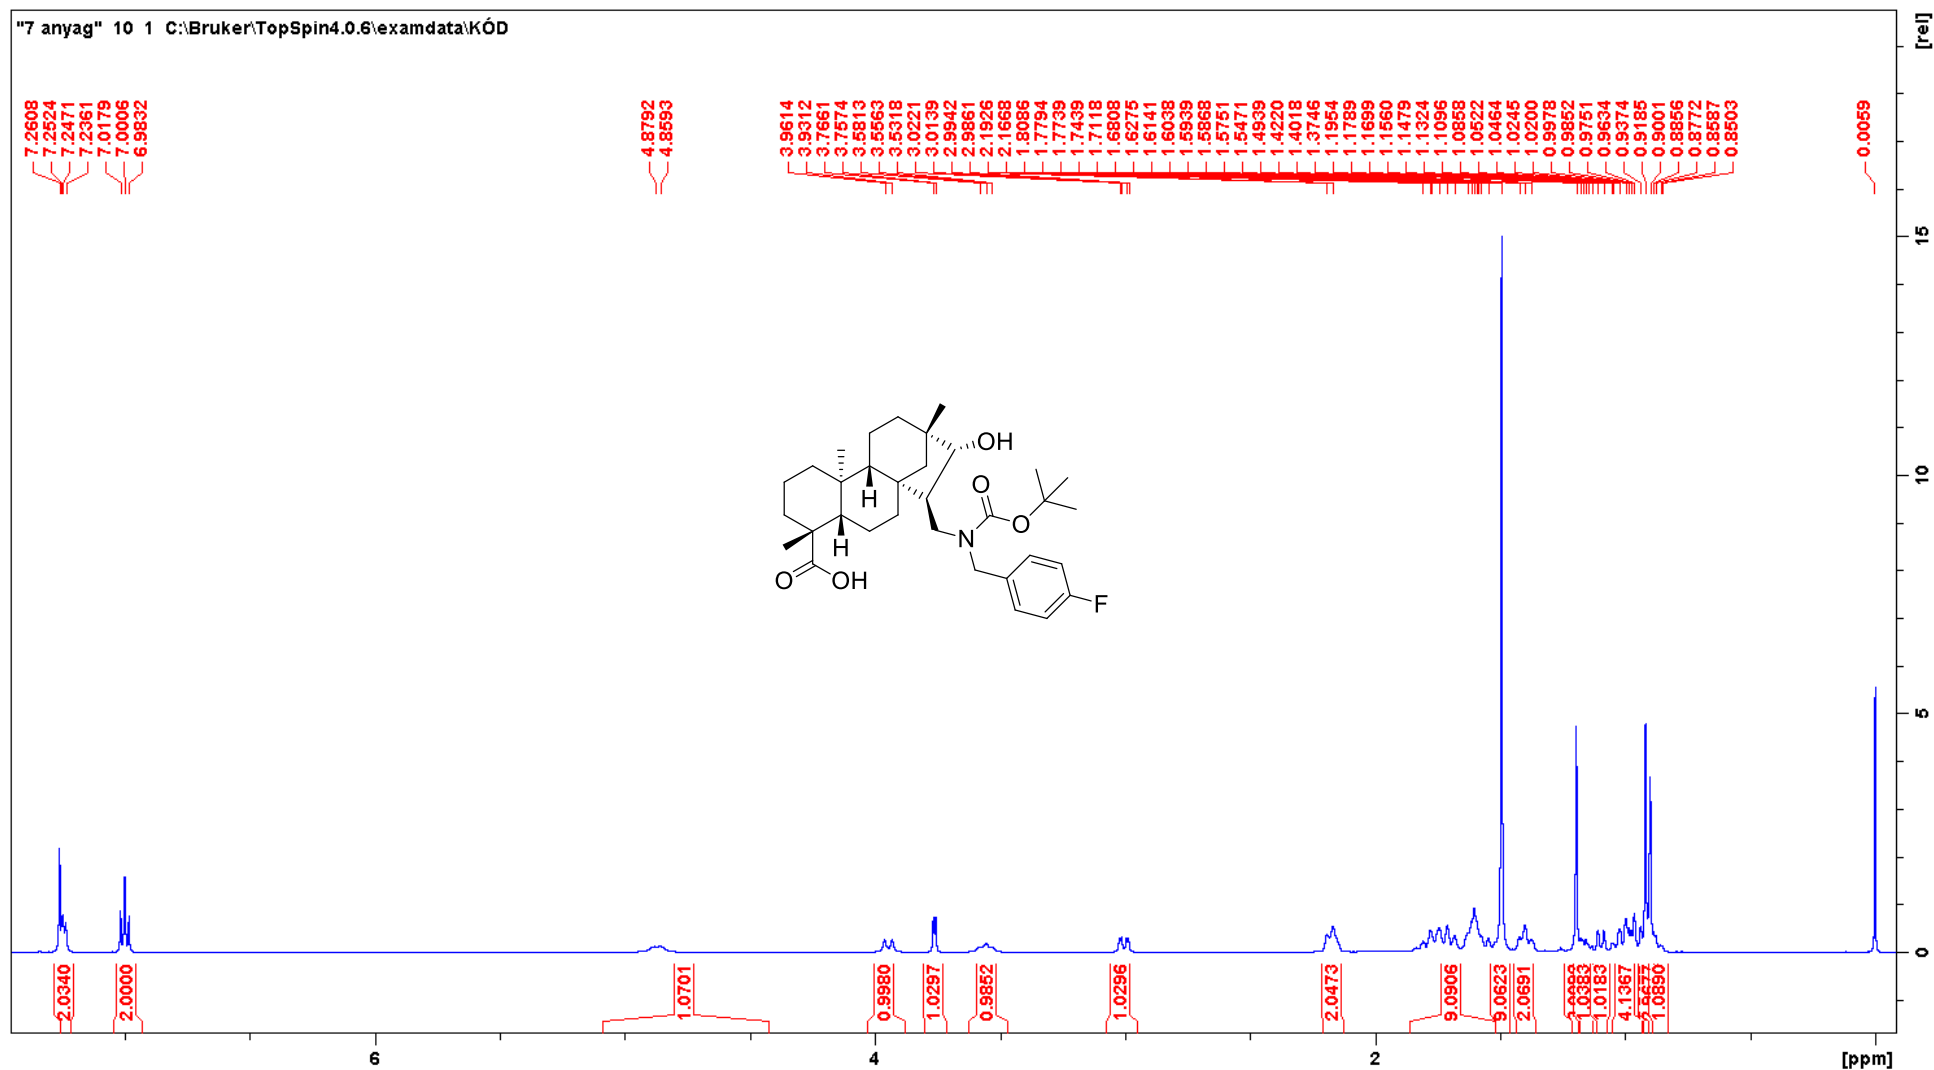



Figure S22

$^{213}\text{C}$ -NMR of compound (4*R*,4*aS*,6*aS*,7*R*,8*R*,9*S*,11*bS*)-7-(((*Tert*-butoxycarbonyl)(4-fluorobenzyl)amino)methyl)-8-hydroxy-4,9,11*b*-trimethyltetradecahydro-6*a*,9-methanocyclohepta[*a*]naphthalene-4-carboxylic acid (**7**):

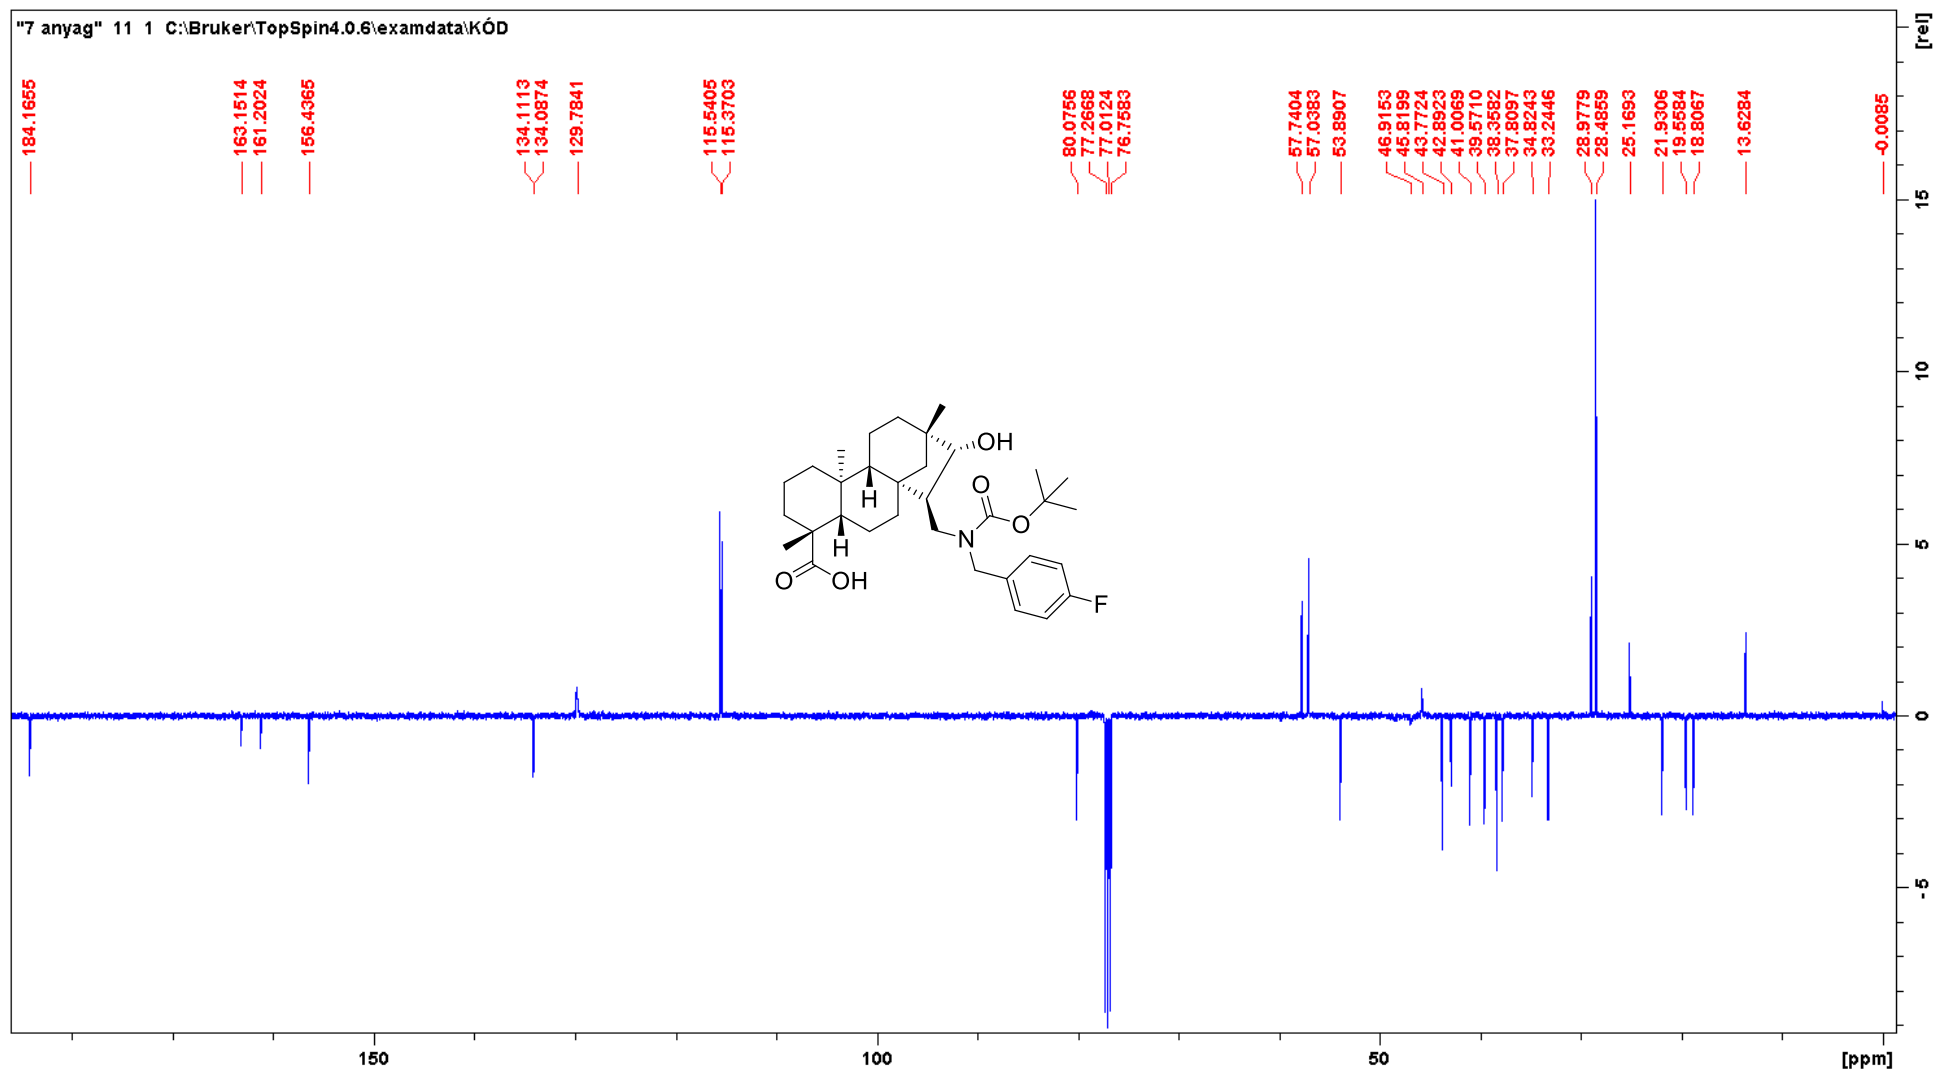

COSY of compound (4*R*,4*aS*,6*aS*,7*R*,8*R*,9*S*,11*bS*)-7-(((*Tert*-butoxycarbonyl)(4-fluorobenzyl)amino)methyl)-8-hydroxy-4,9,11*b*-trimethyltetradecahydro-6*a*,9-methanocyclohepta[*a*]naphthalene-4-carboxylic acid (**7**):

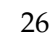

Figure S24

HSQC of compound (4*R*,4*aS*,6*aS*,7*R*,8*R*,9*S*,11*bS*)-7-(((*Tert*-butoxycarbonyl)(4-fluorobenzyl)amino)methyl)-8-hydroxy-4,9,11*b*-trimethyltetradecahydro-6*a*,9-methanocyclohepta[*a*]naphthalene-4-carboxylic acid (**7**):

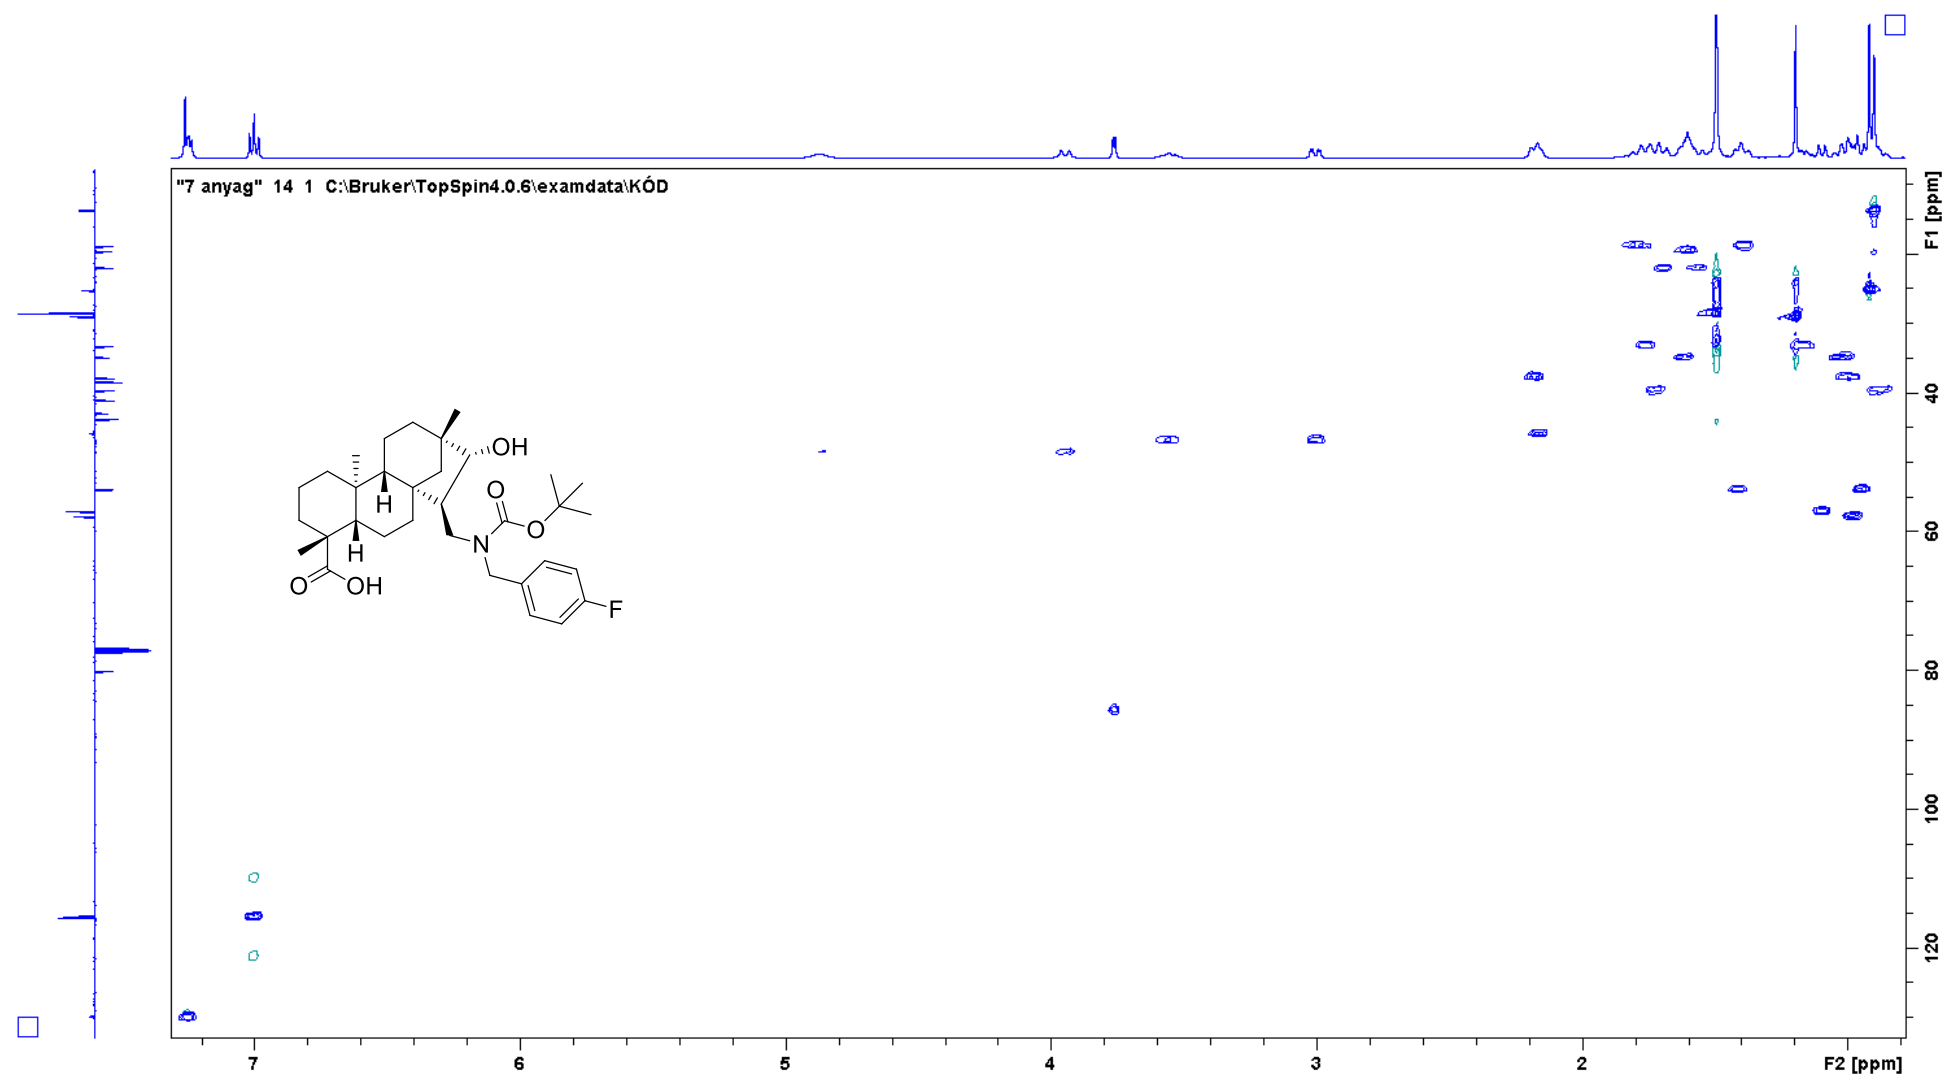

Figure S25

HMBC of compound (4*R*,4*aS*,6*aS*,7*R*,8*R*,9*S*,11*bS*)-7-(((*Tert*-butoxycarbonyl)(4-fluorobenzyl)amino)methyl)-8-hydroxy-4,9,11*b*-trimethyltetradecahydro-6*a*,9-methanocyclohepta[*a*]naphthalene-4-carboxylic acid (**7**):

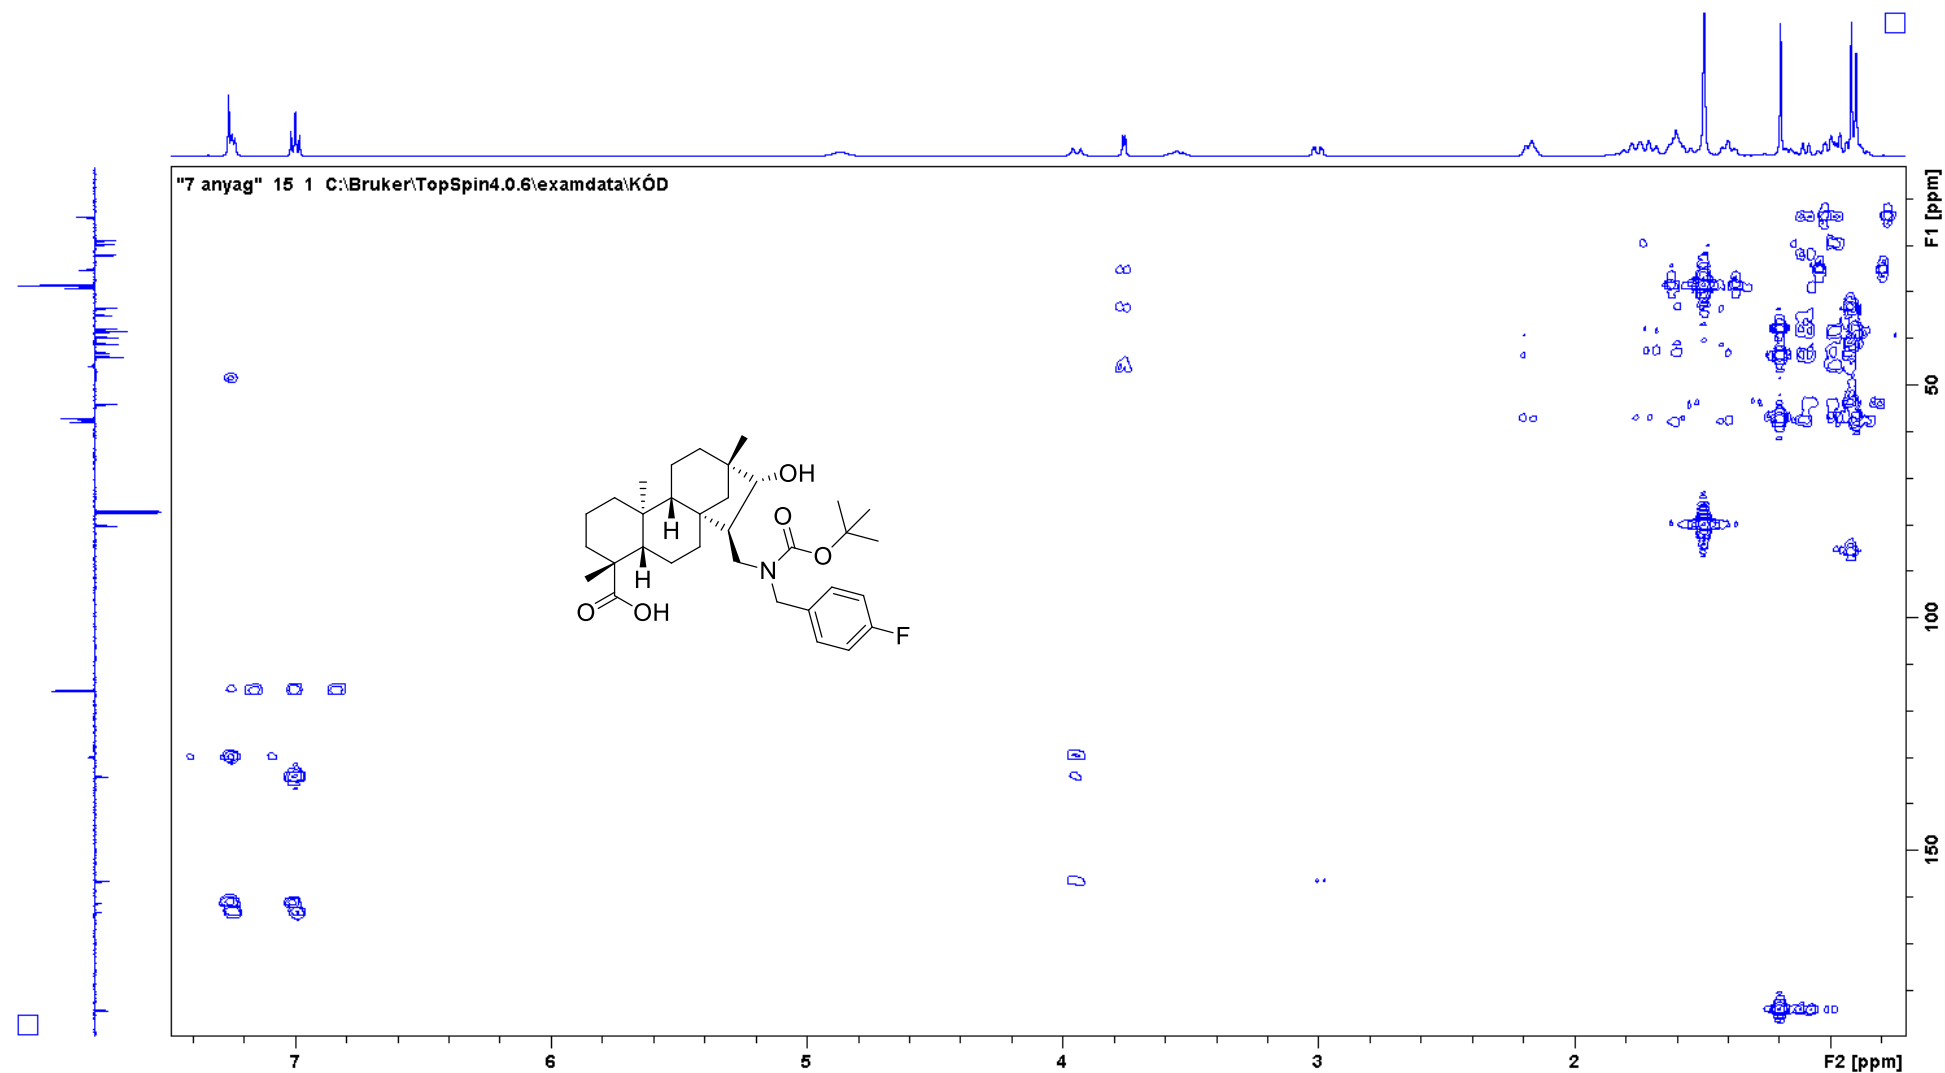

<sup>19</sup>F-NMR of compound (4*R*,4*aS*,6*aS*,7*R*,8*R*,9*S*,11*bS*)-7-(((*Tert*-butoxycarbonyl)(4-fluorobenzyl)amino)methyl)-8-hydroxy-4,9,11*b*-trimethyltetradecahydro-6*a*,9-methanocyclohepta[*a*]naphthalene-4-carboxylic acid (**7**):

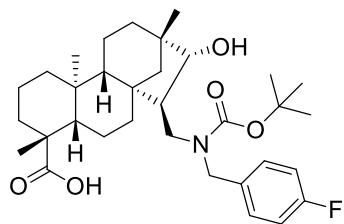

Figure S27

$^1\text{H}$ -NMR of compound (4*R*,4*aS*,6*aS*,7*R*,8*R*,9*S*,11*bS*)-7-(((4-Fluorobenzyl)amino)methyl)-8-hydroxy-4,9,11*b*-trimethyltetradecahydro-6*a*,9-methanocyclohepta[*a*]naphthalene-4-carboxylic acid (**8**):

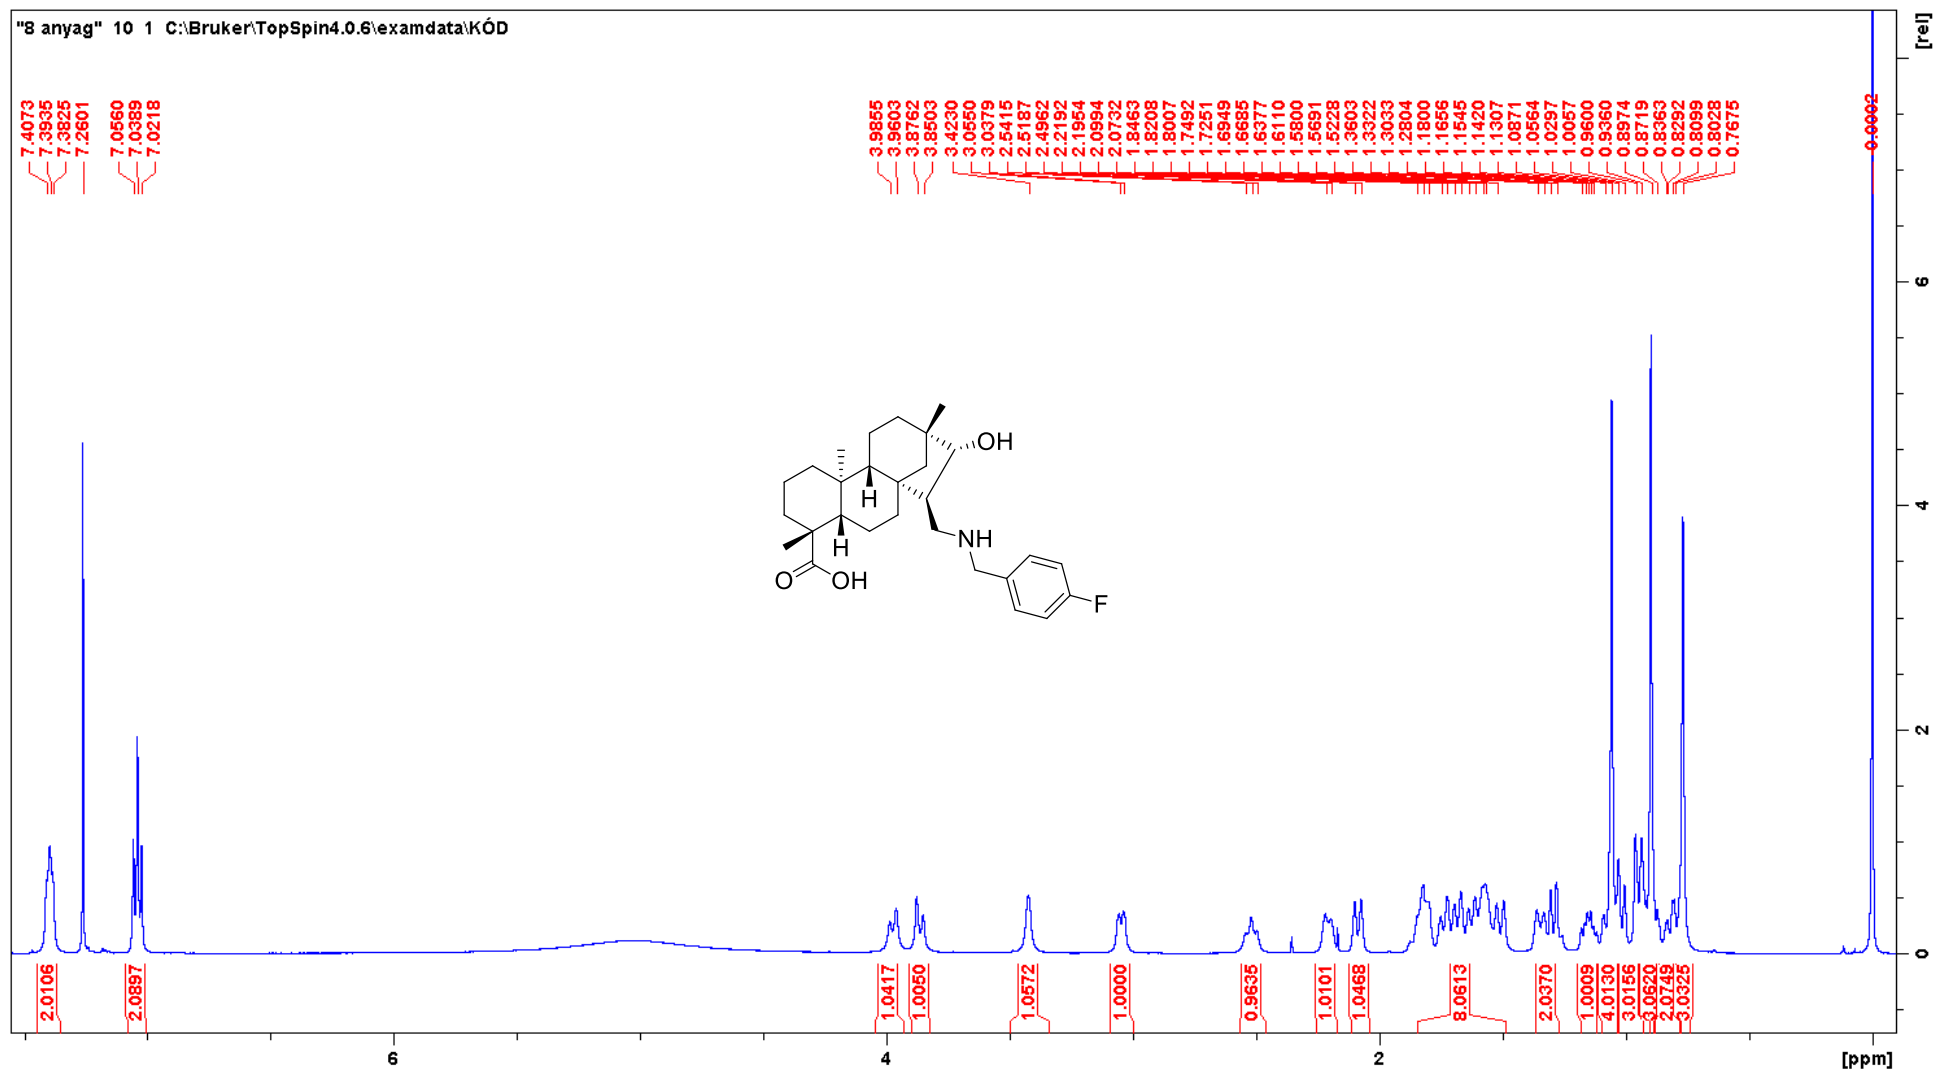

Figure S28

$^{13}\text{C}$ -NMR of compound (4*R*,4*aS*,6*aS*,7*R*,8*R*,9*S*,11*bS*)-7-(((4-Fluorobenzyl)amino)methyl)-8-hydroxy-4,9,11*b*-trimethyltetra decahydro-6*a*,9-methanocyclohepta[*a*]naphthalene-4-carboxylic acid (**8**):

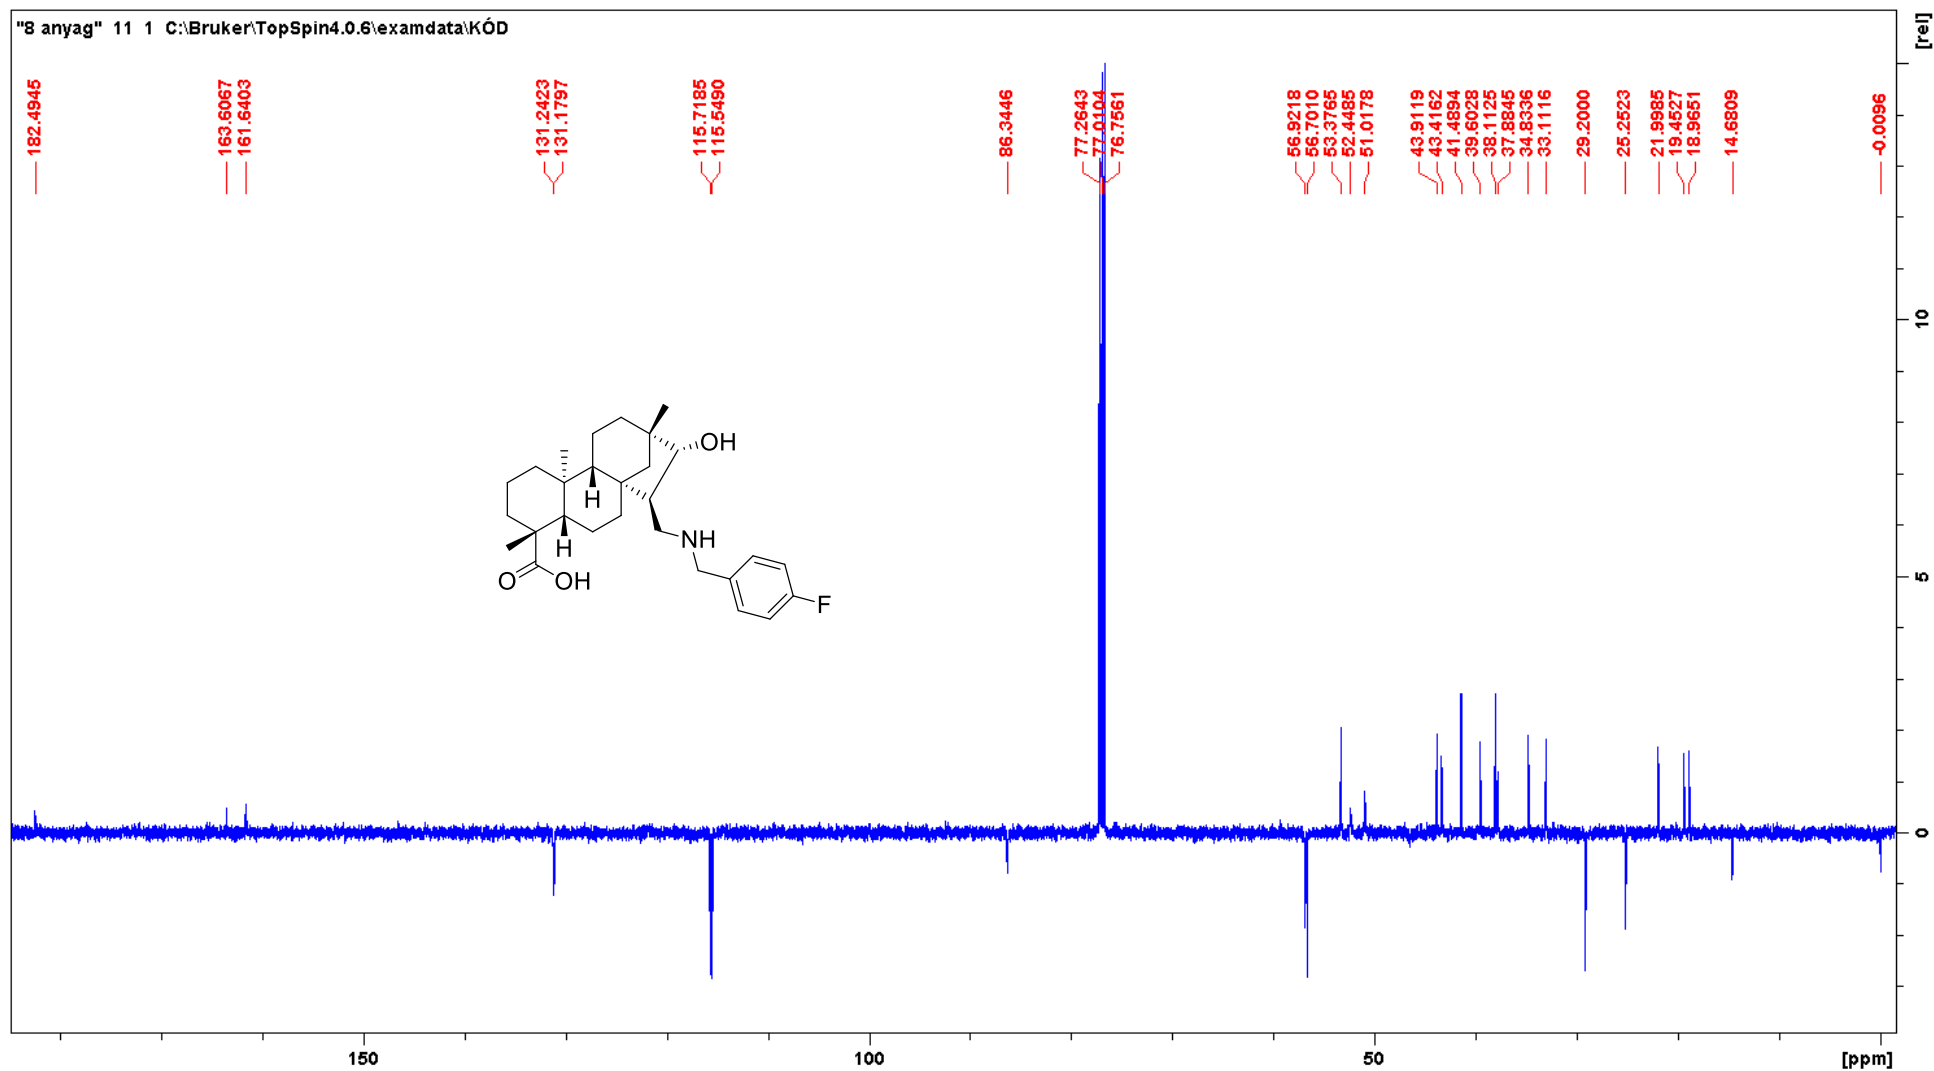

Figure S29

COSY of compound (4*R*,4*aS*,6*aS*,7*R*,8*R*,9*S*,11*bS*)-7-(((4-Fluorobenzyl)amino)methyl)-8-hydroxy-4,9,11*b*-trimethyltetradecahydro-6*a*,9-methanocyclohepta[*a*]naphthalene-4-carboxylic acid (**8**):

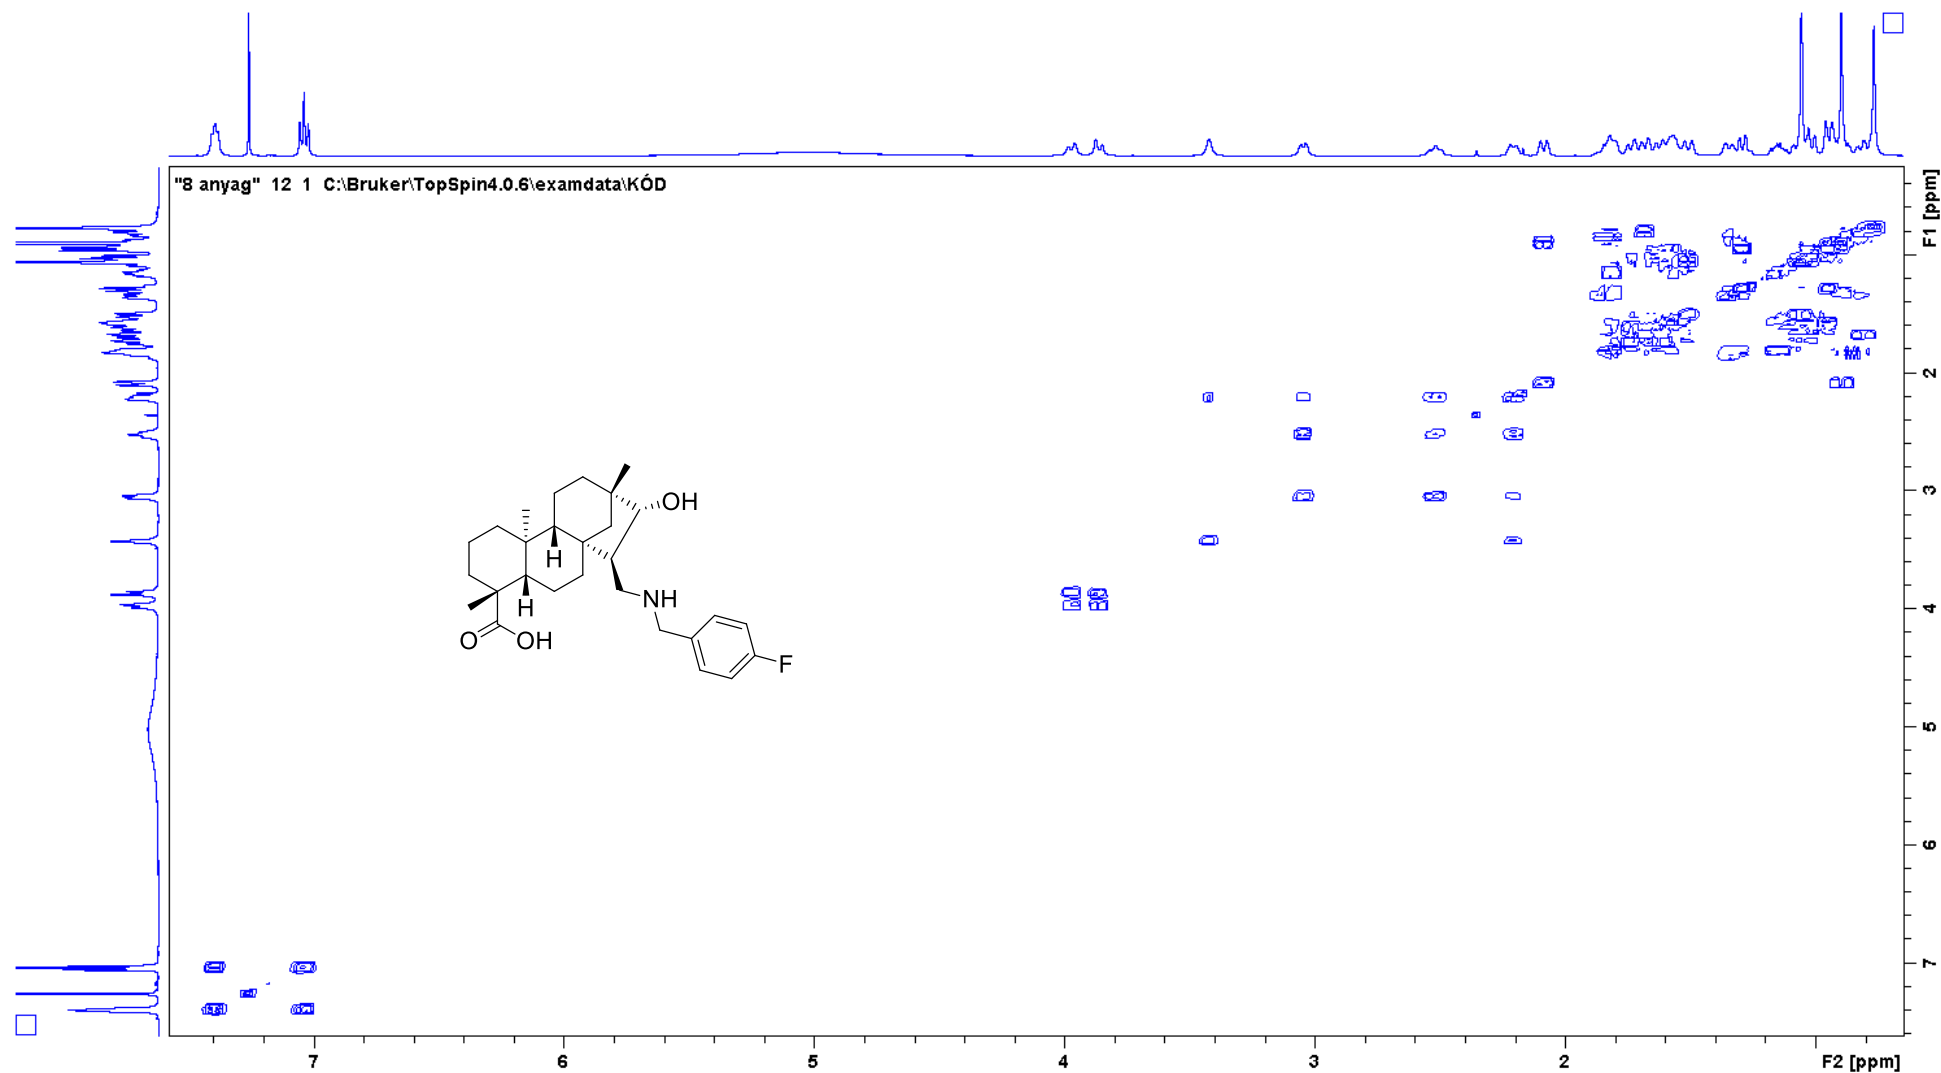



Figure S30

NOESY of compound (4*R*,4*aS*,6*aS*,7*R*,8*R*,9*S*,11*bS*)-7-(((4-Fluorobenzyl)amino)methyl)-8-hydroxy-4,9,11*b*-trimethyltetradecahydro-6*a*,9-methanocyclohepta[*a*]naphthalene-4-carboxylic acid (**8**):

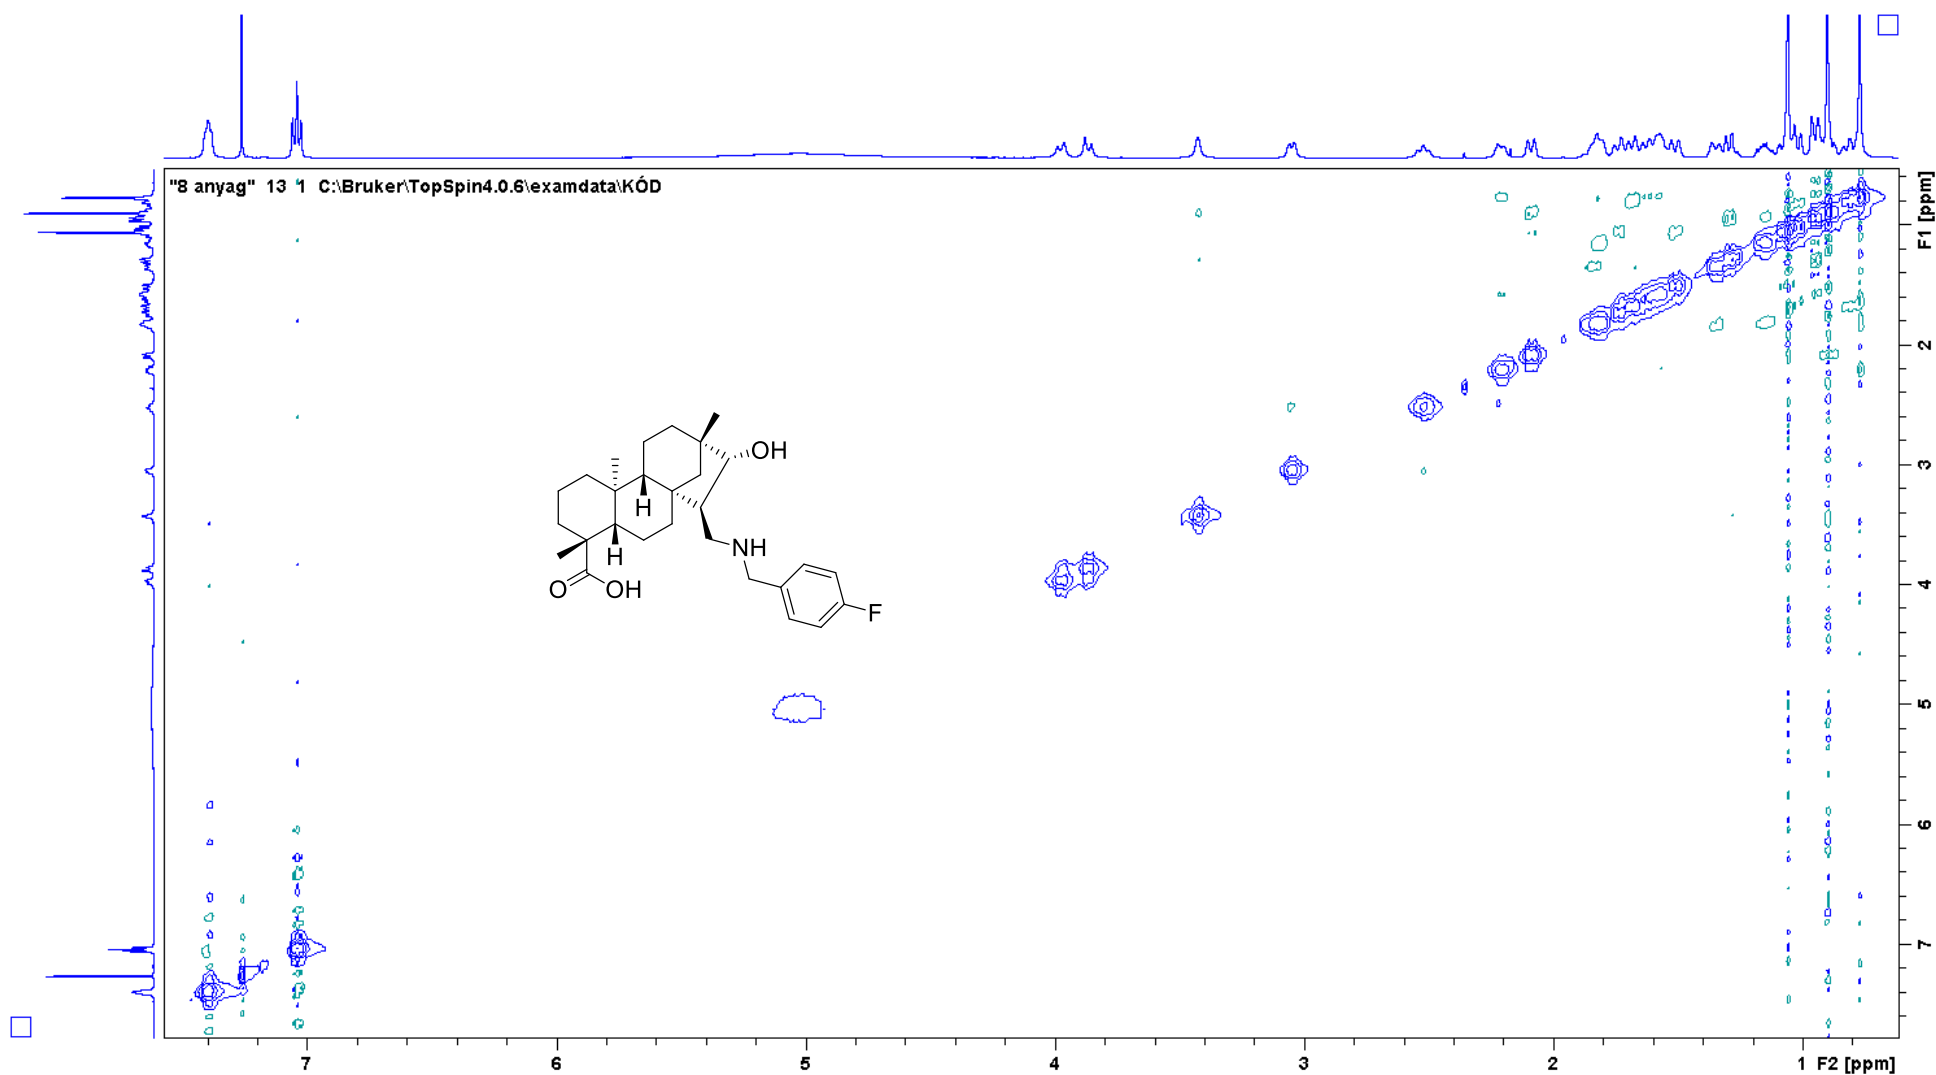

Figure S31

HSQC of compound (4*R*,4*aS*,6*aS*,7*R*,8*R*,9*S*,11*bS*)-7-(((4-Fluorobenzyl)amino)methyl)-8-hydroxy-4,9,11*b*-trimethyltetradecahydro-6*a*,9-methanocyclohepta[*a*]naphthalene-4-carboxylic acid (**8**):

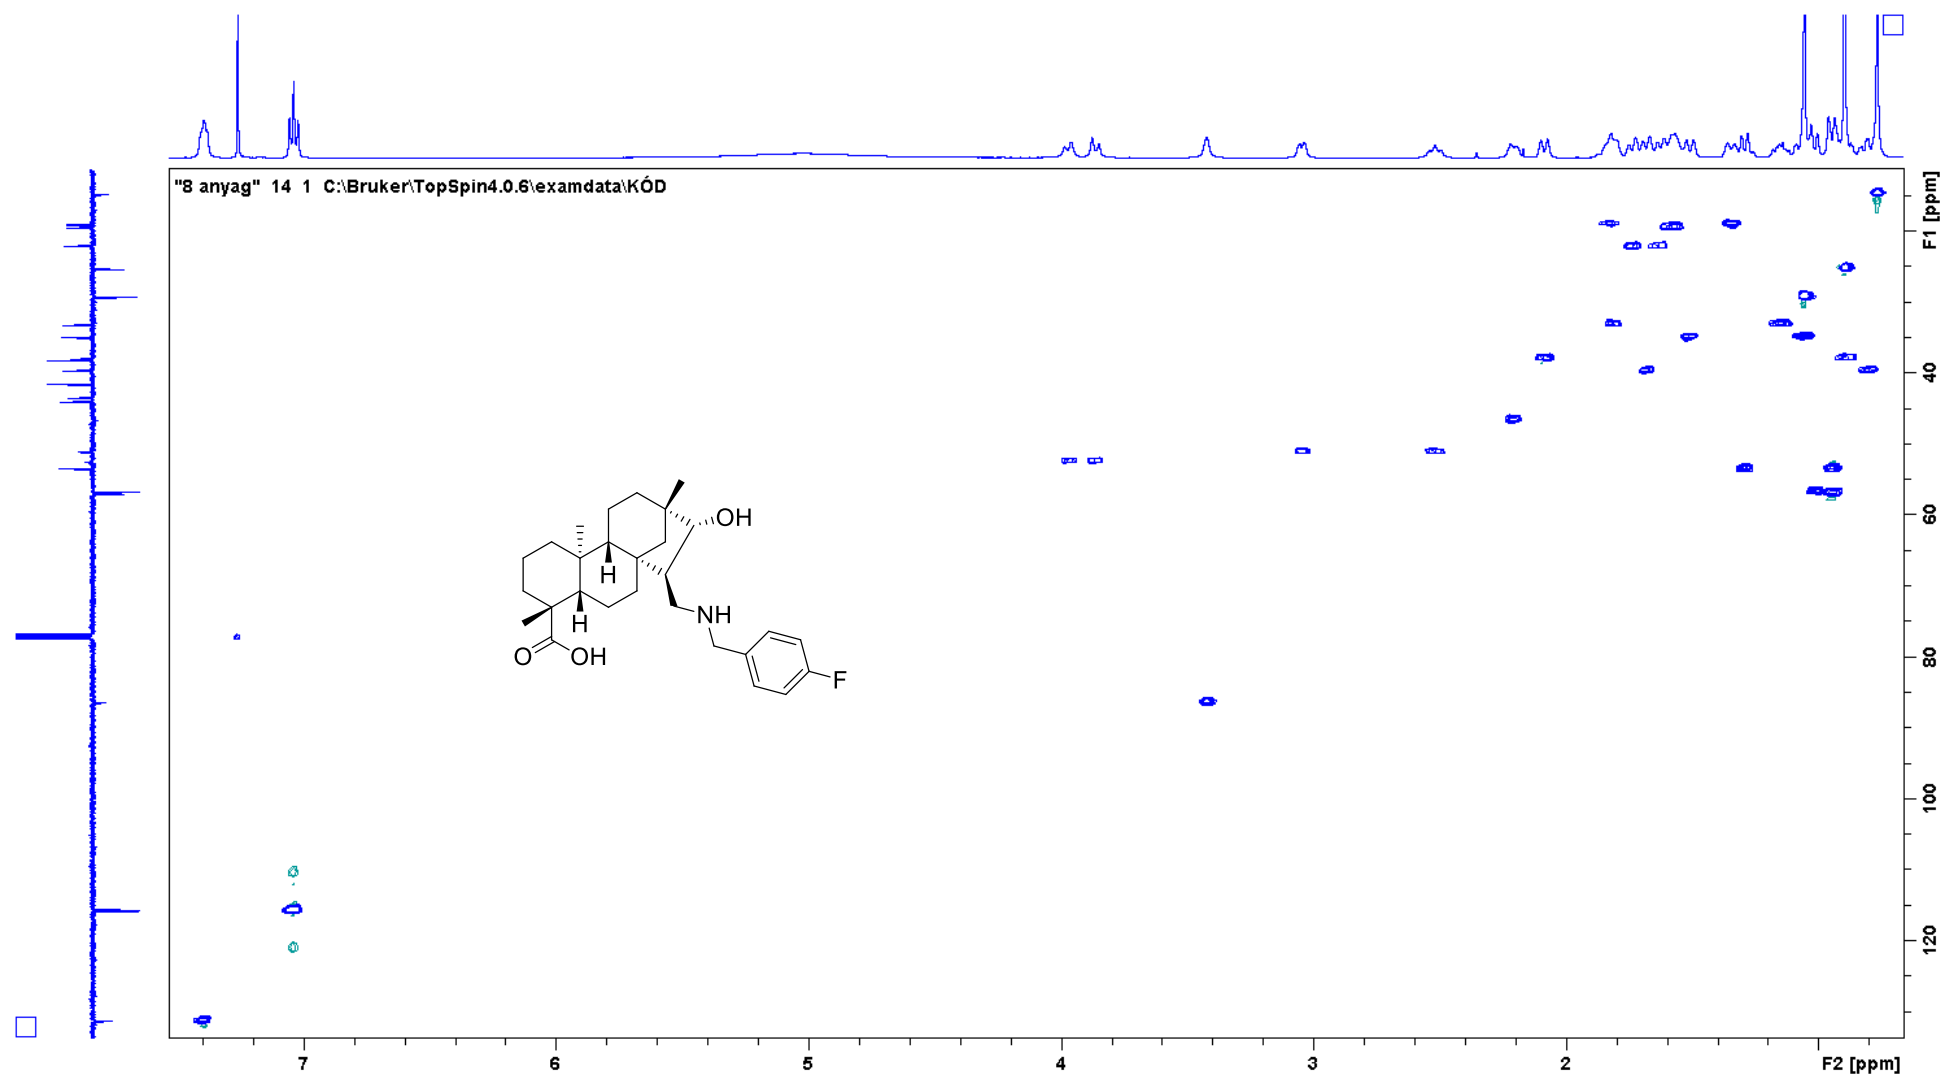

Figure S32

HMBC of compound (4*R*,4*aS*,6*aS*,7*R*,8*R*,9*S*,11*bS*)-7-(((4-Fluorobenzyl)amino)methyl)-8-hydroxy-4,9,11*b*-trimethyltetradecahydro-6*a*,9-methanocyclohepta[*a*]naphthalene-4-carboxylic acid (**8**):

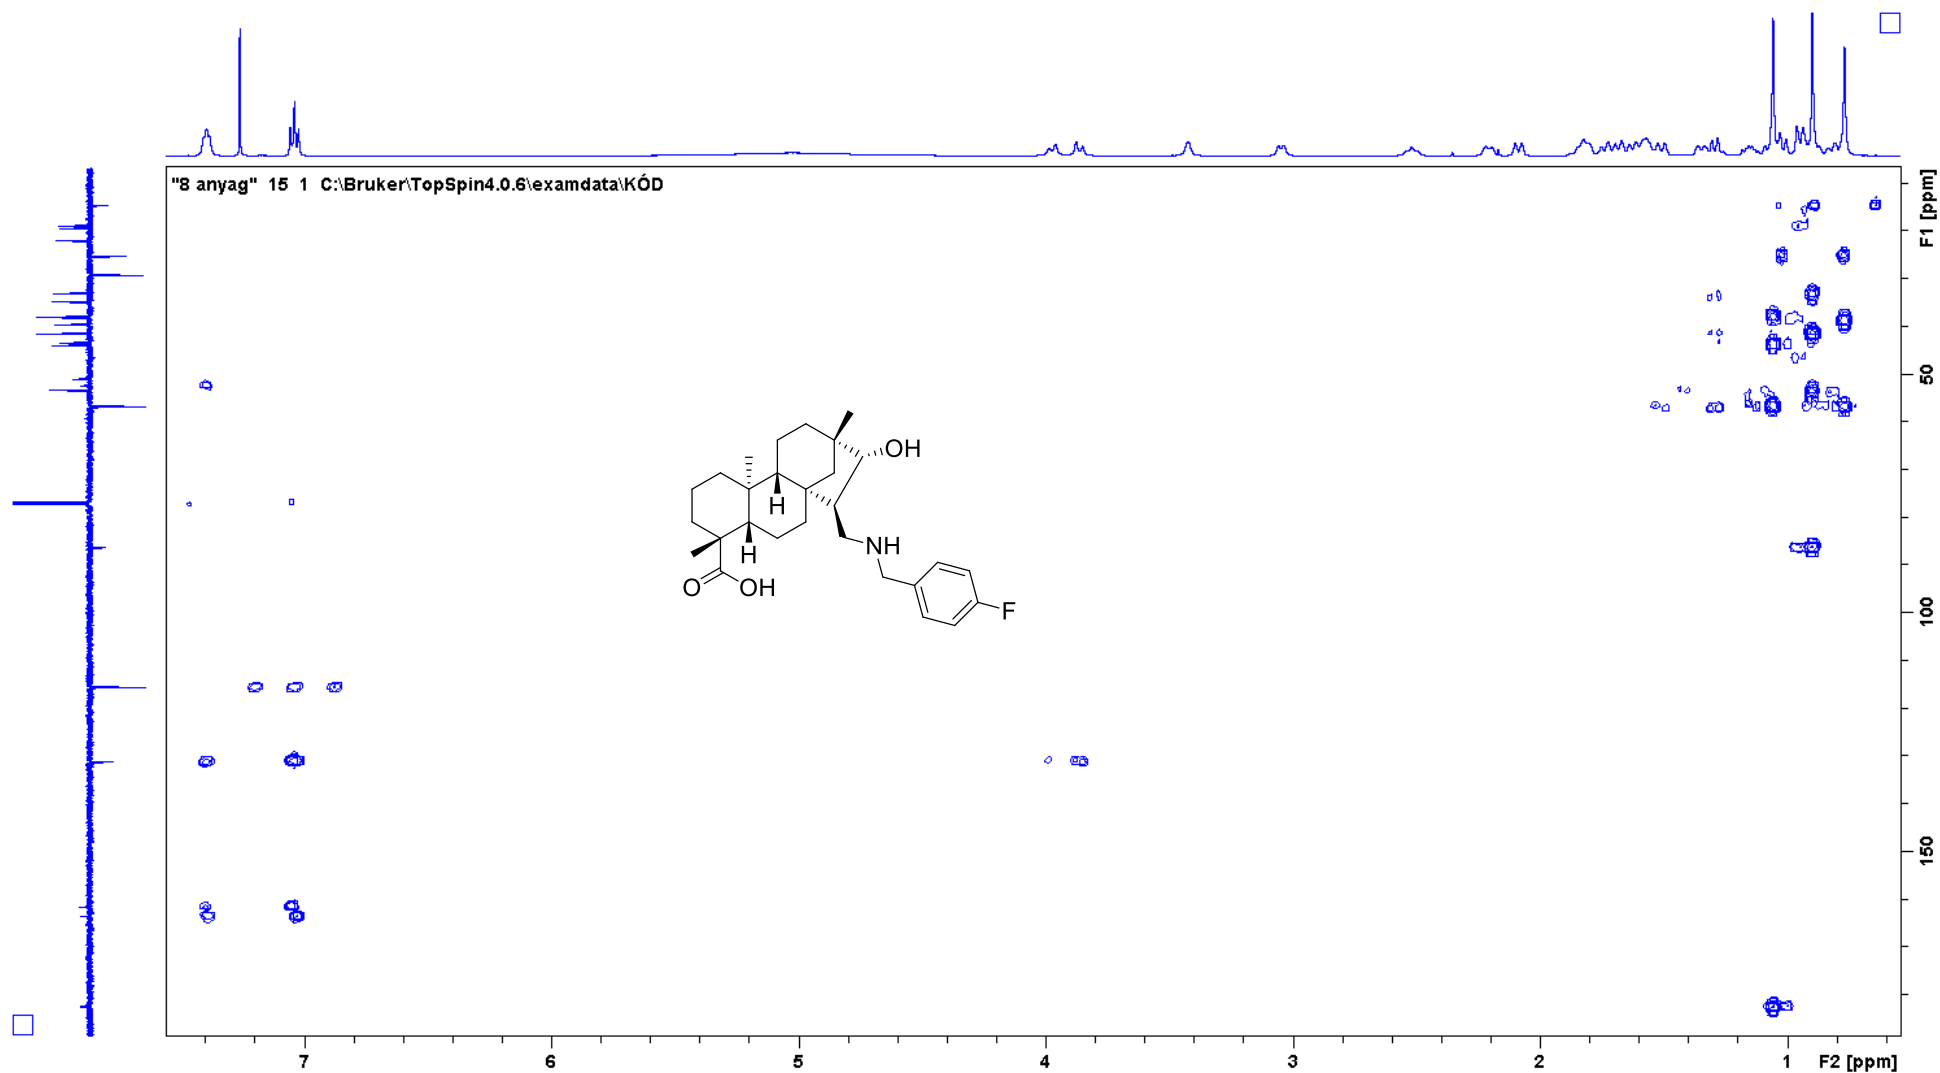

Figure S33

$^{19}\text{F}$ -NMR of compound (4*R*,4*aS*,6*aS*,7*R*,8*R*,9*S*,11*bS*)-7-(((4-Fluorobenzyl)amino)methyl)-8-hydroxy-4,9,11*b*-trimethyltetradecahydro-6*a*,9-methanocyclohepta[*a*]naphthalene-4-carboxylic acid (**8**):

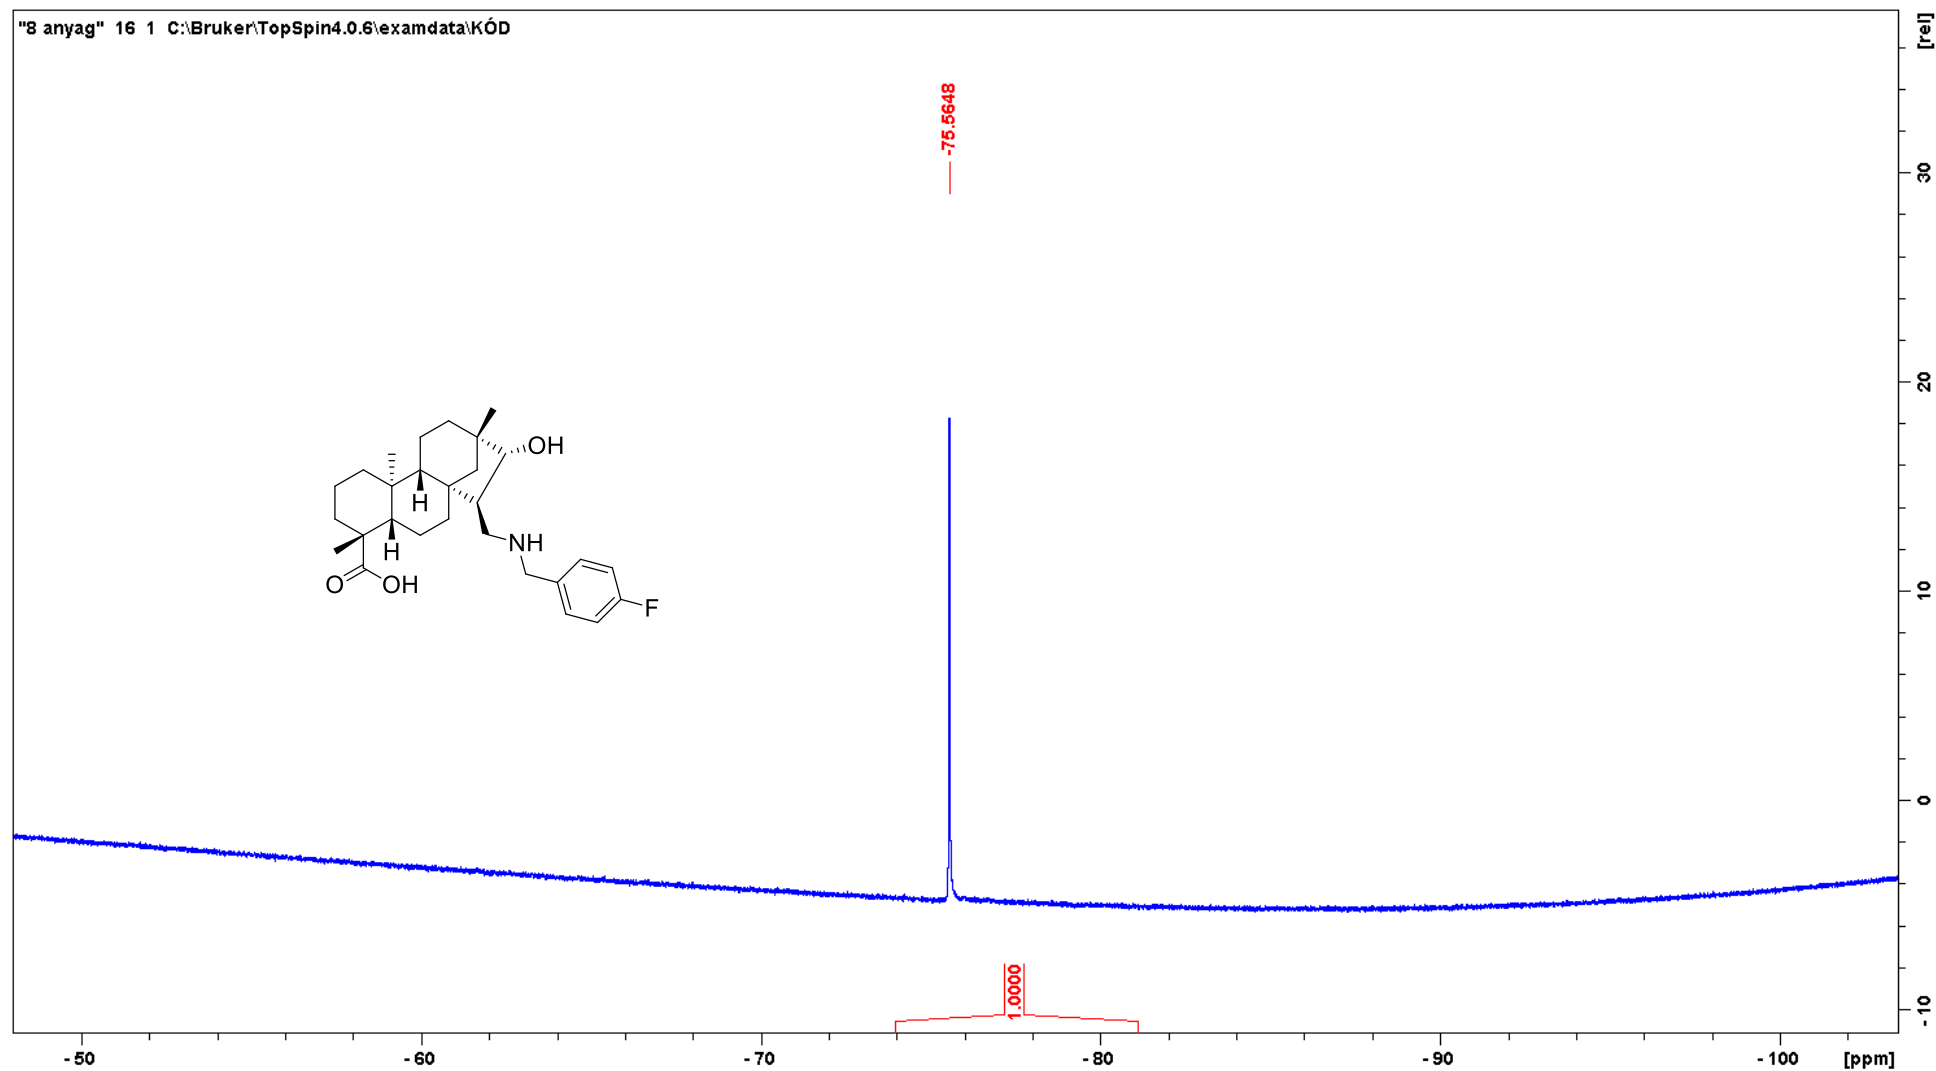

Figure S34

<sup>1</sup>H-NMR of compound 3-(4-Bromobutoxy)-3-oxopropyl acrylate (**10**):

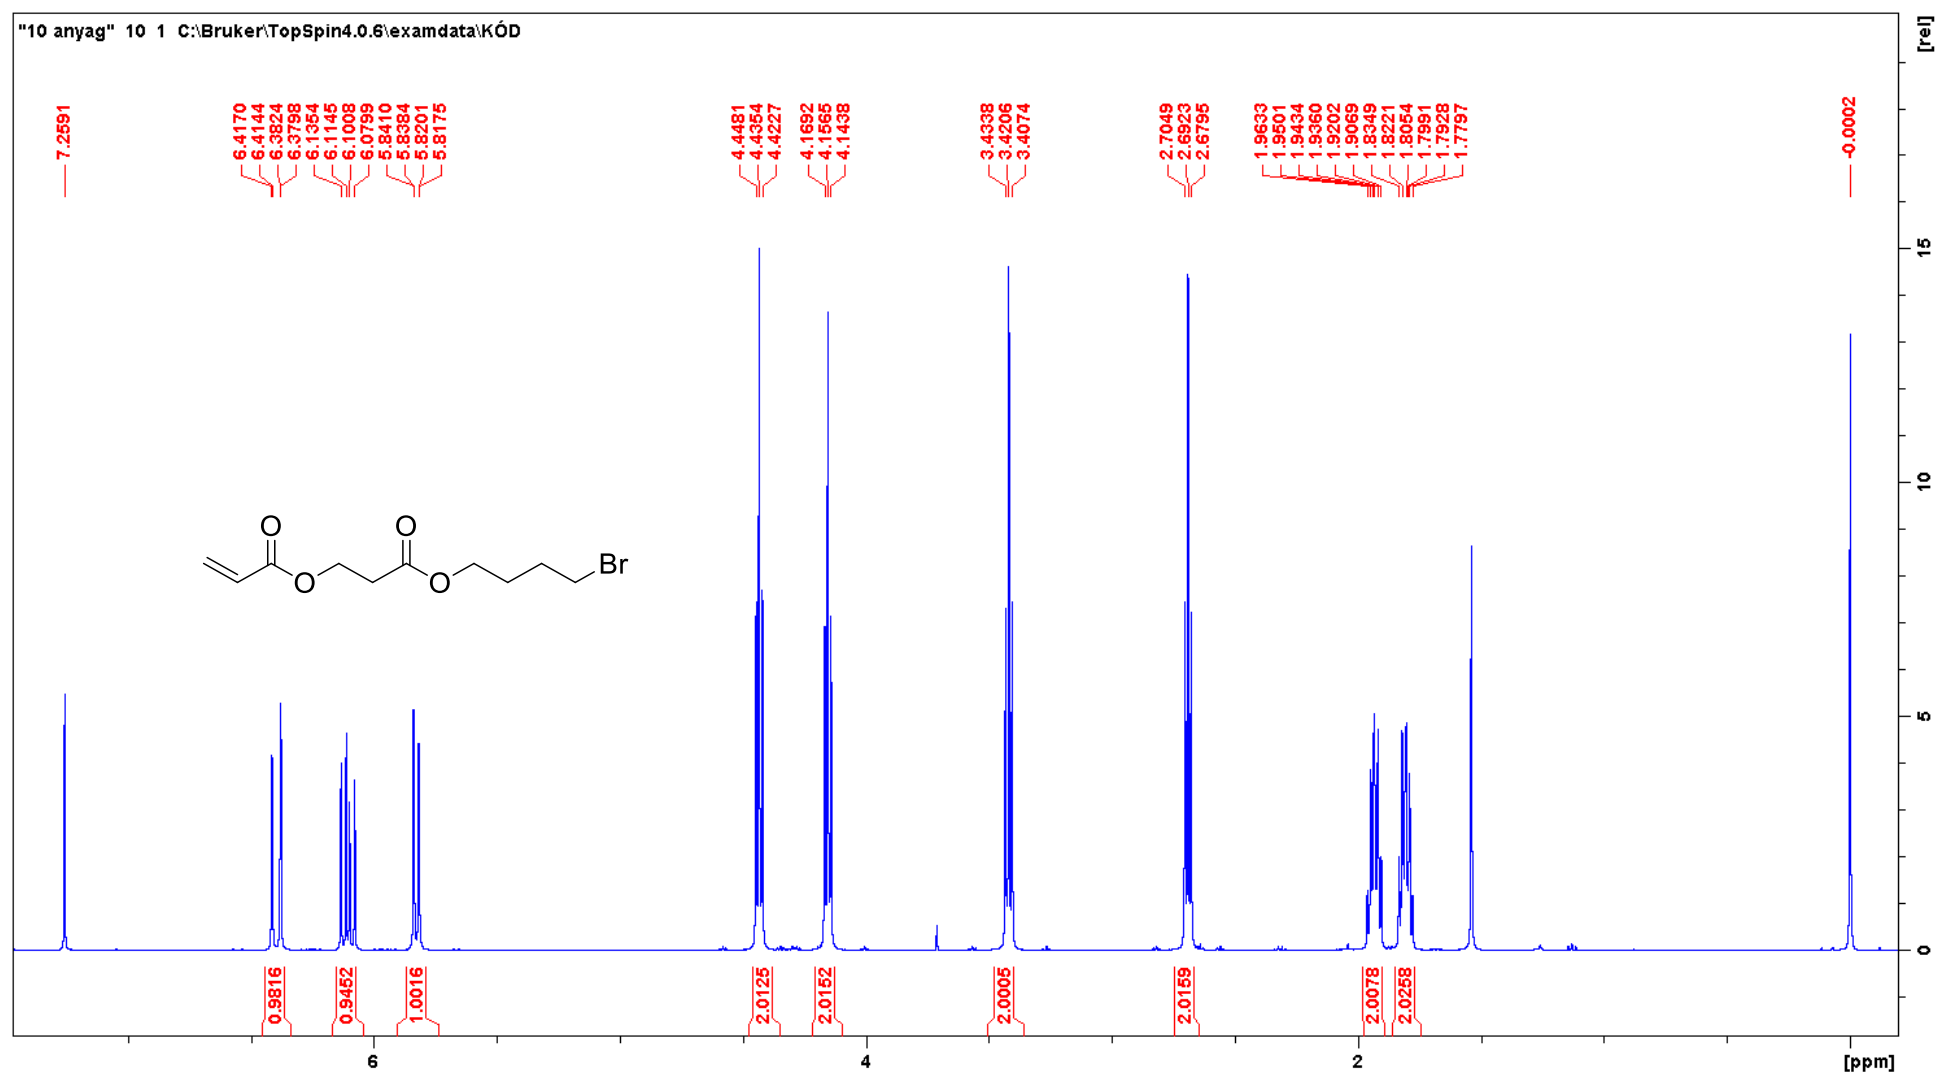

Figure S35

$^{13}\text{C}$ -NMR of compound 3-(4-Bromobutoxy)-3-oxopropyl acrylate (**10**):

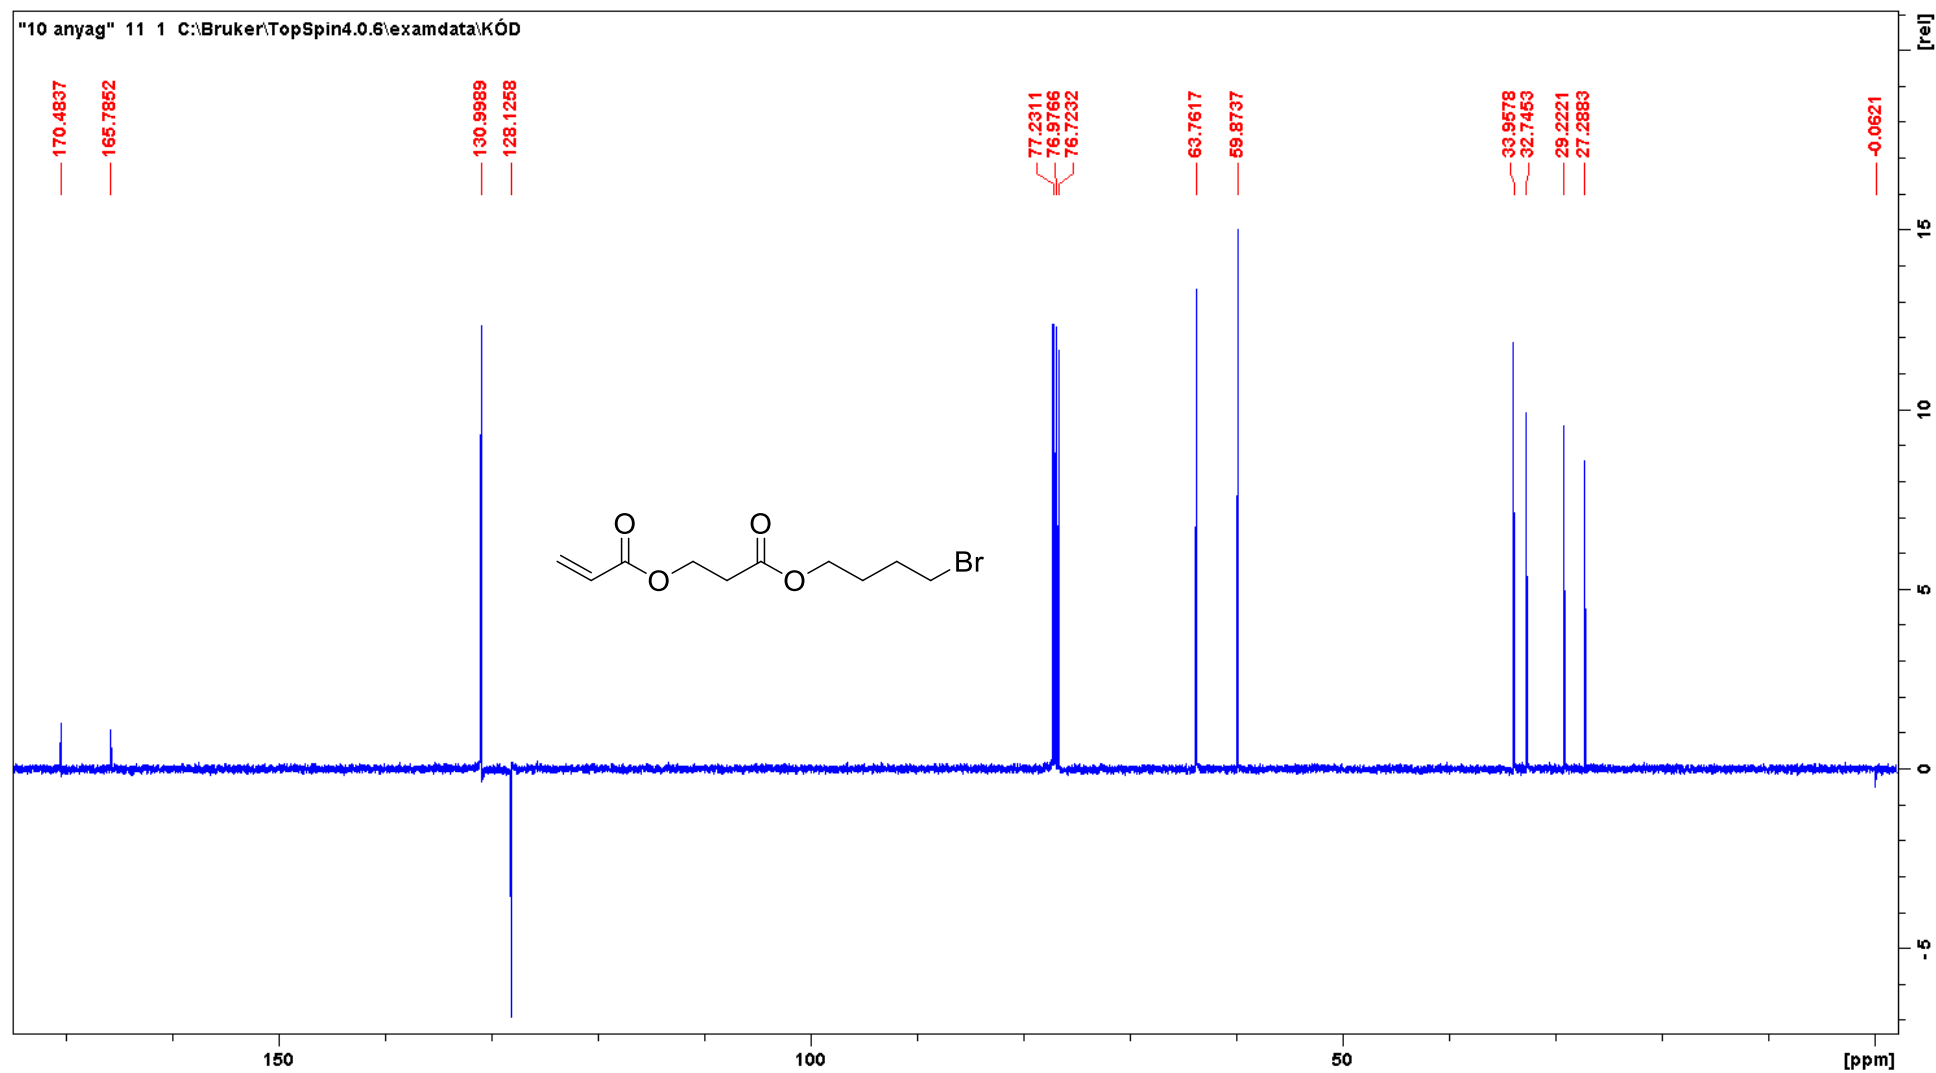

Figure S36  
COSY of compound 3-(4-Bromobutoxy)-3-oxopropyl acrylate (**10**):

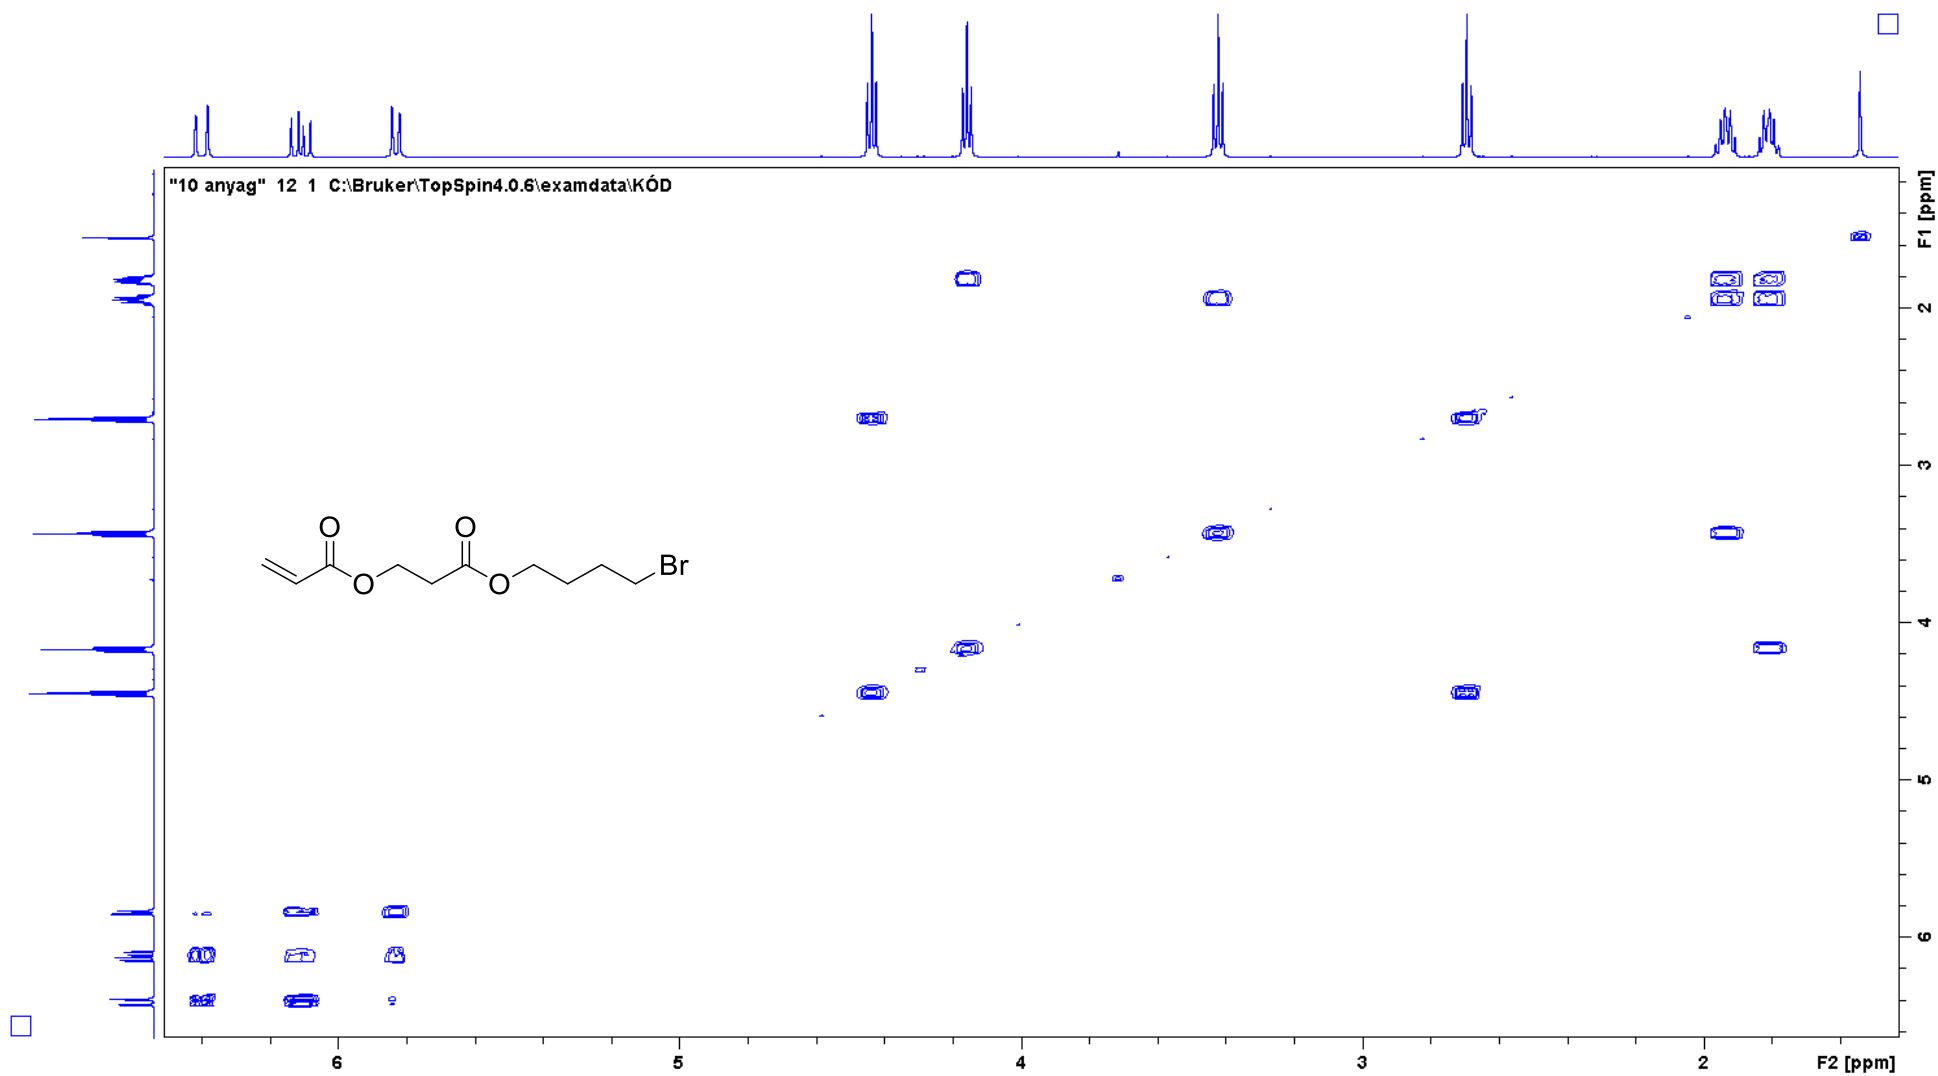

Figure S37

NOESY of compound 3-(4-Bromobutoxy)-3-oxopropyl acrylate (**10**):

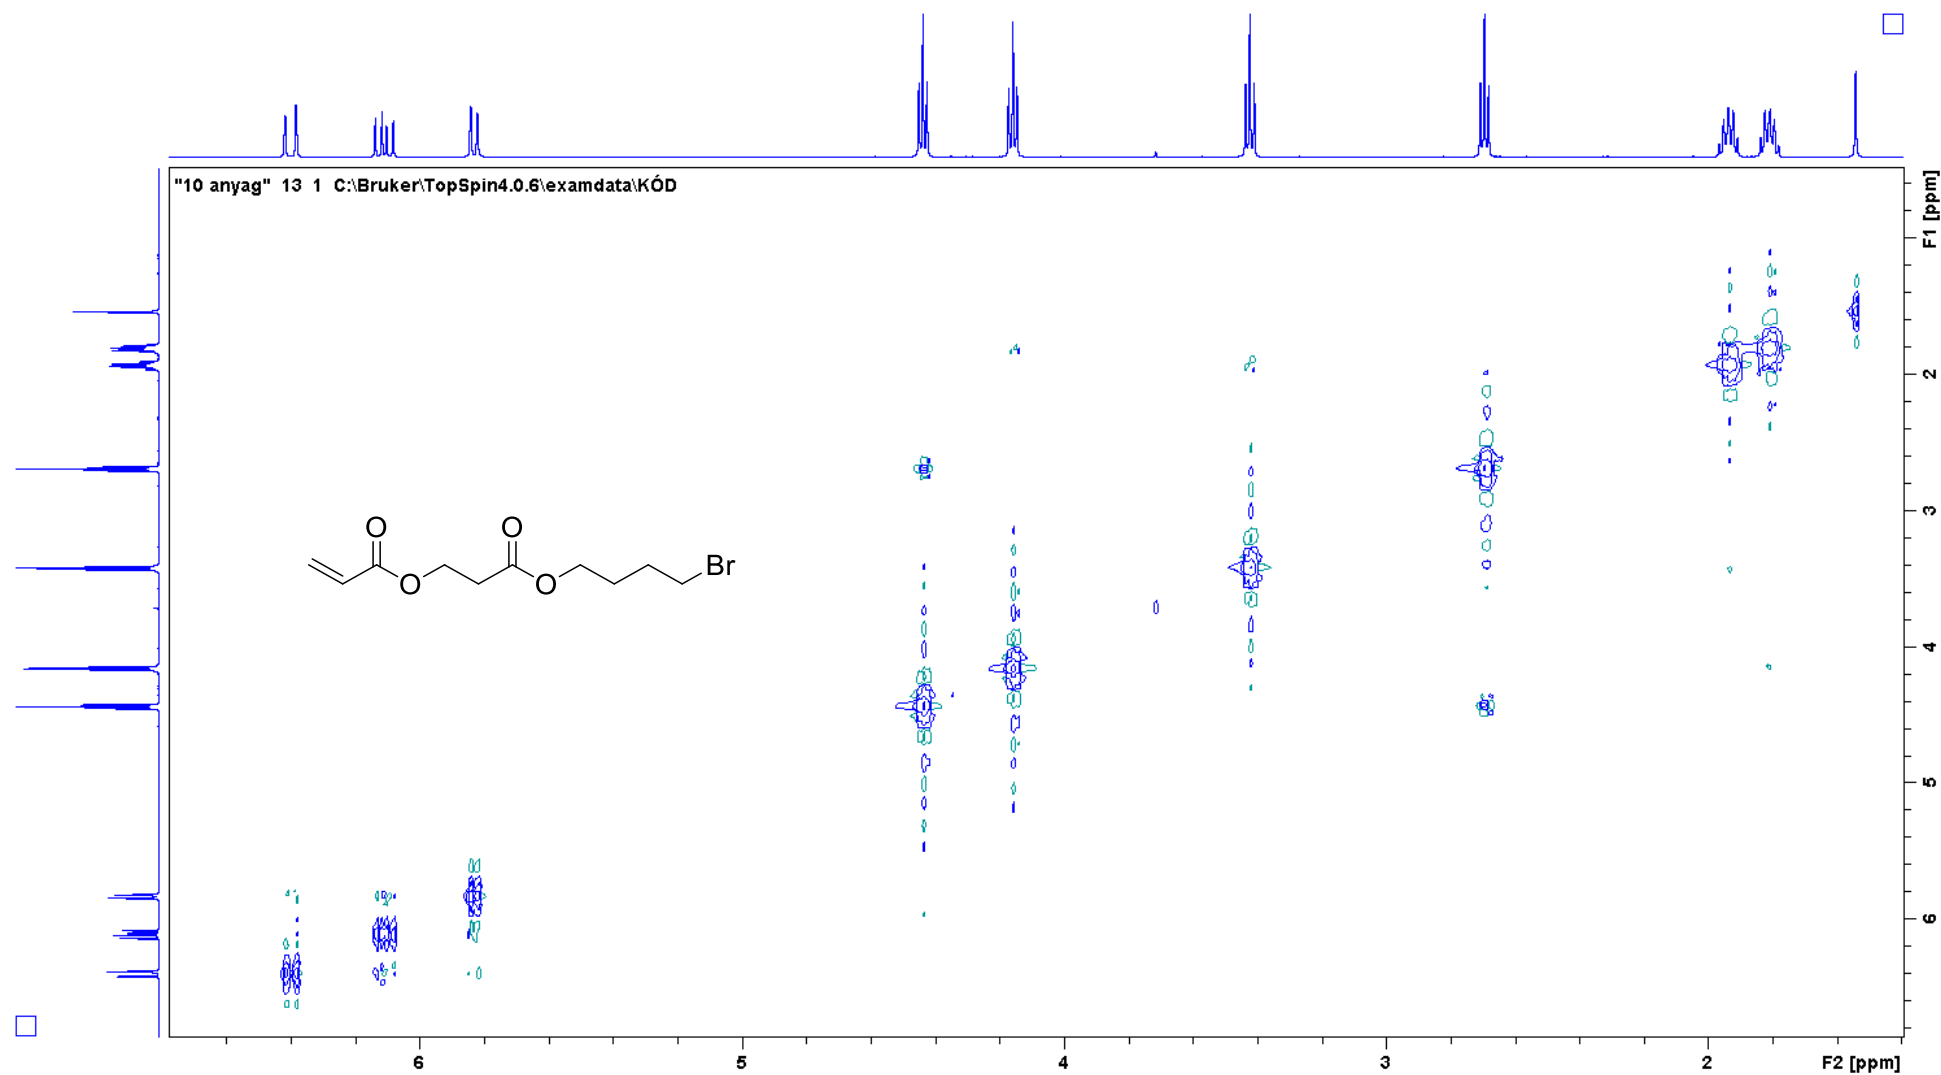



Figure S38  
HSQC of compound 3-(4-Bromobutoxy)-3-oxopropyl acrylate (**10**):

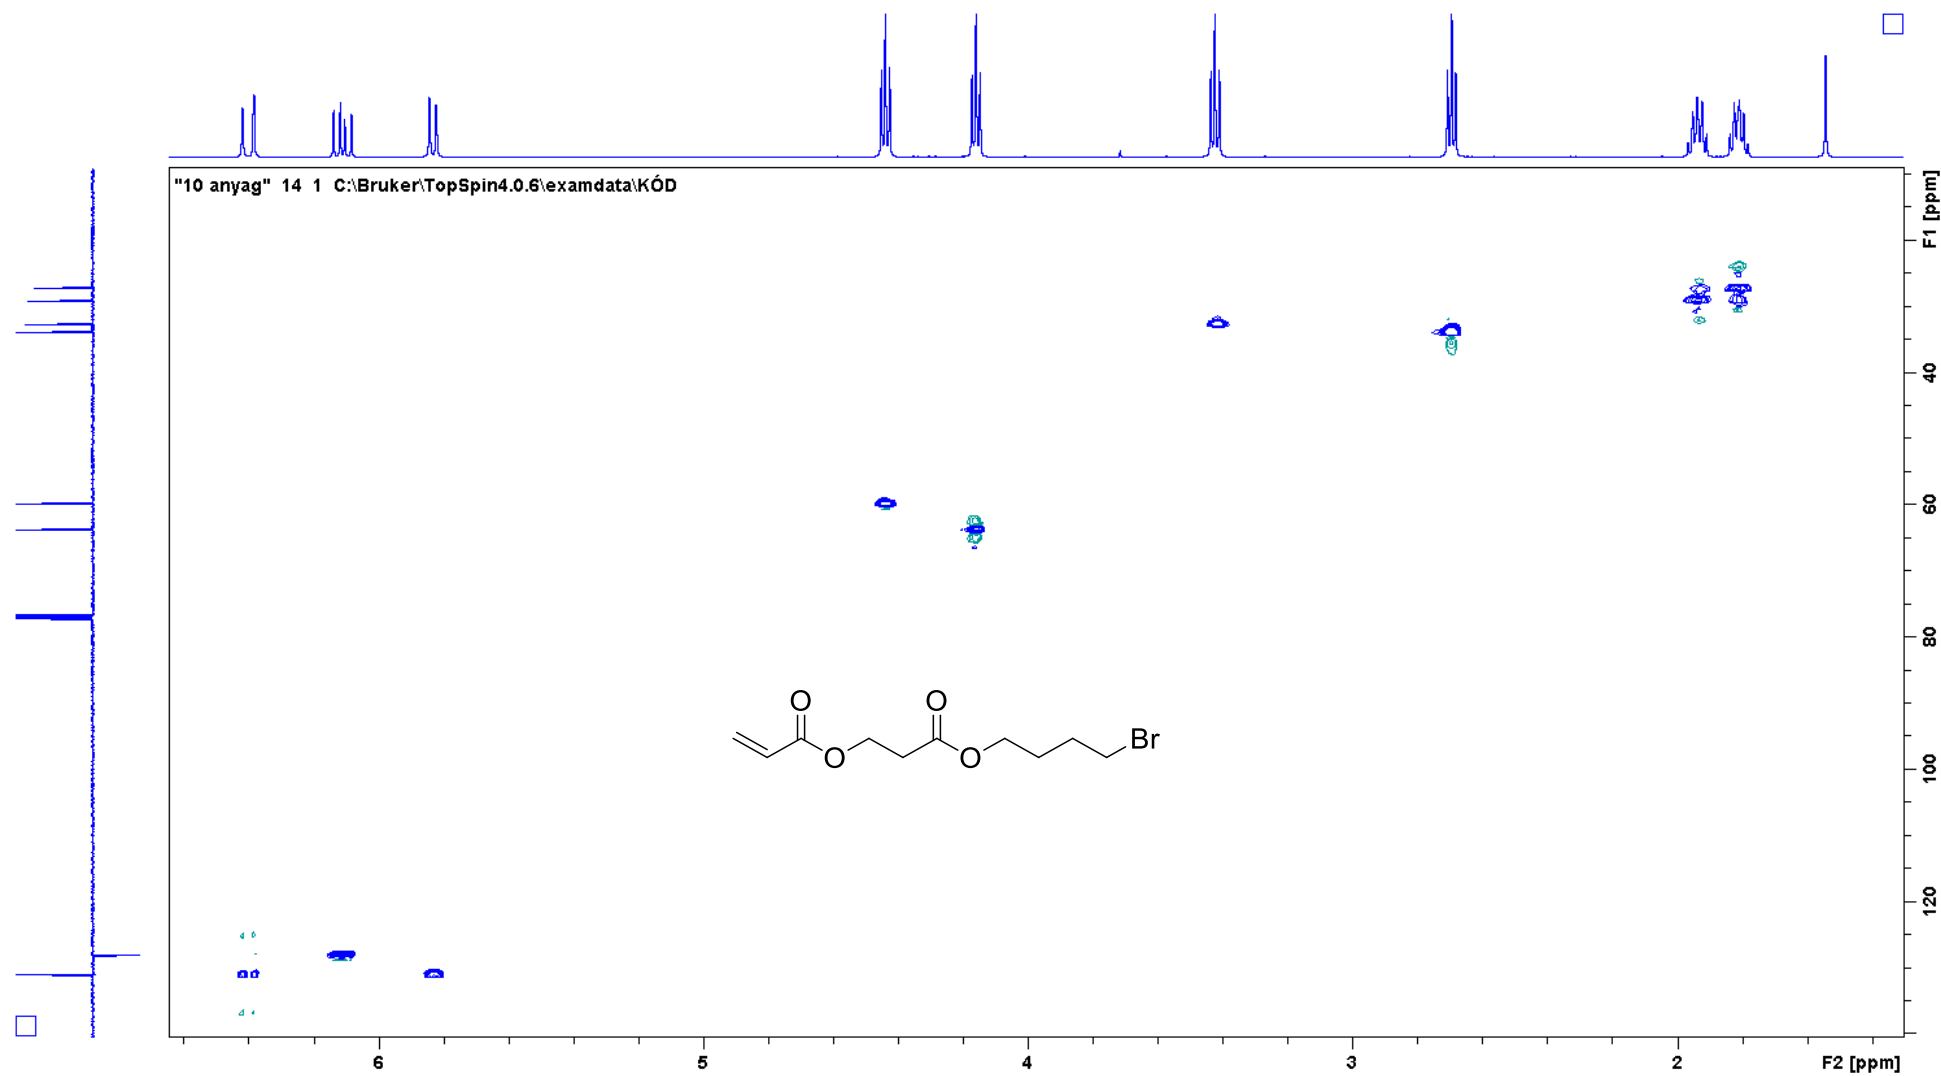

Figure S39  
HMBC of compound 3-(4-Bromobutoxy)-3-oxopropyl acrylate (**10**):

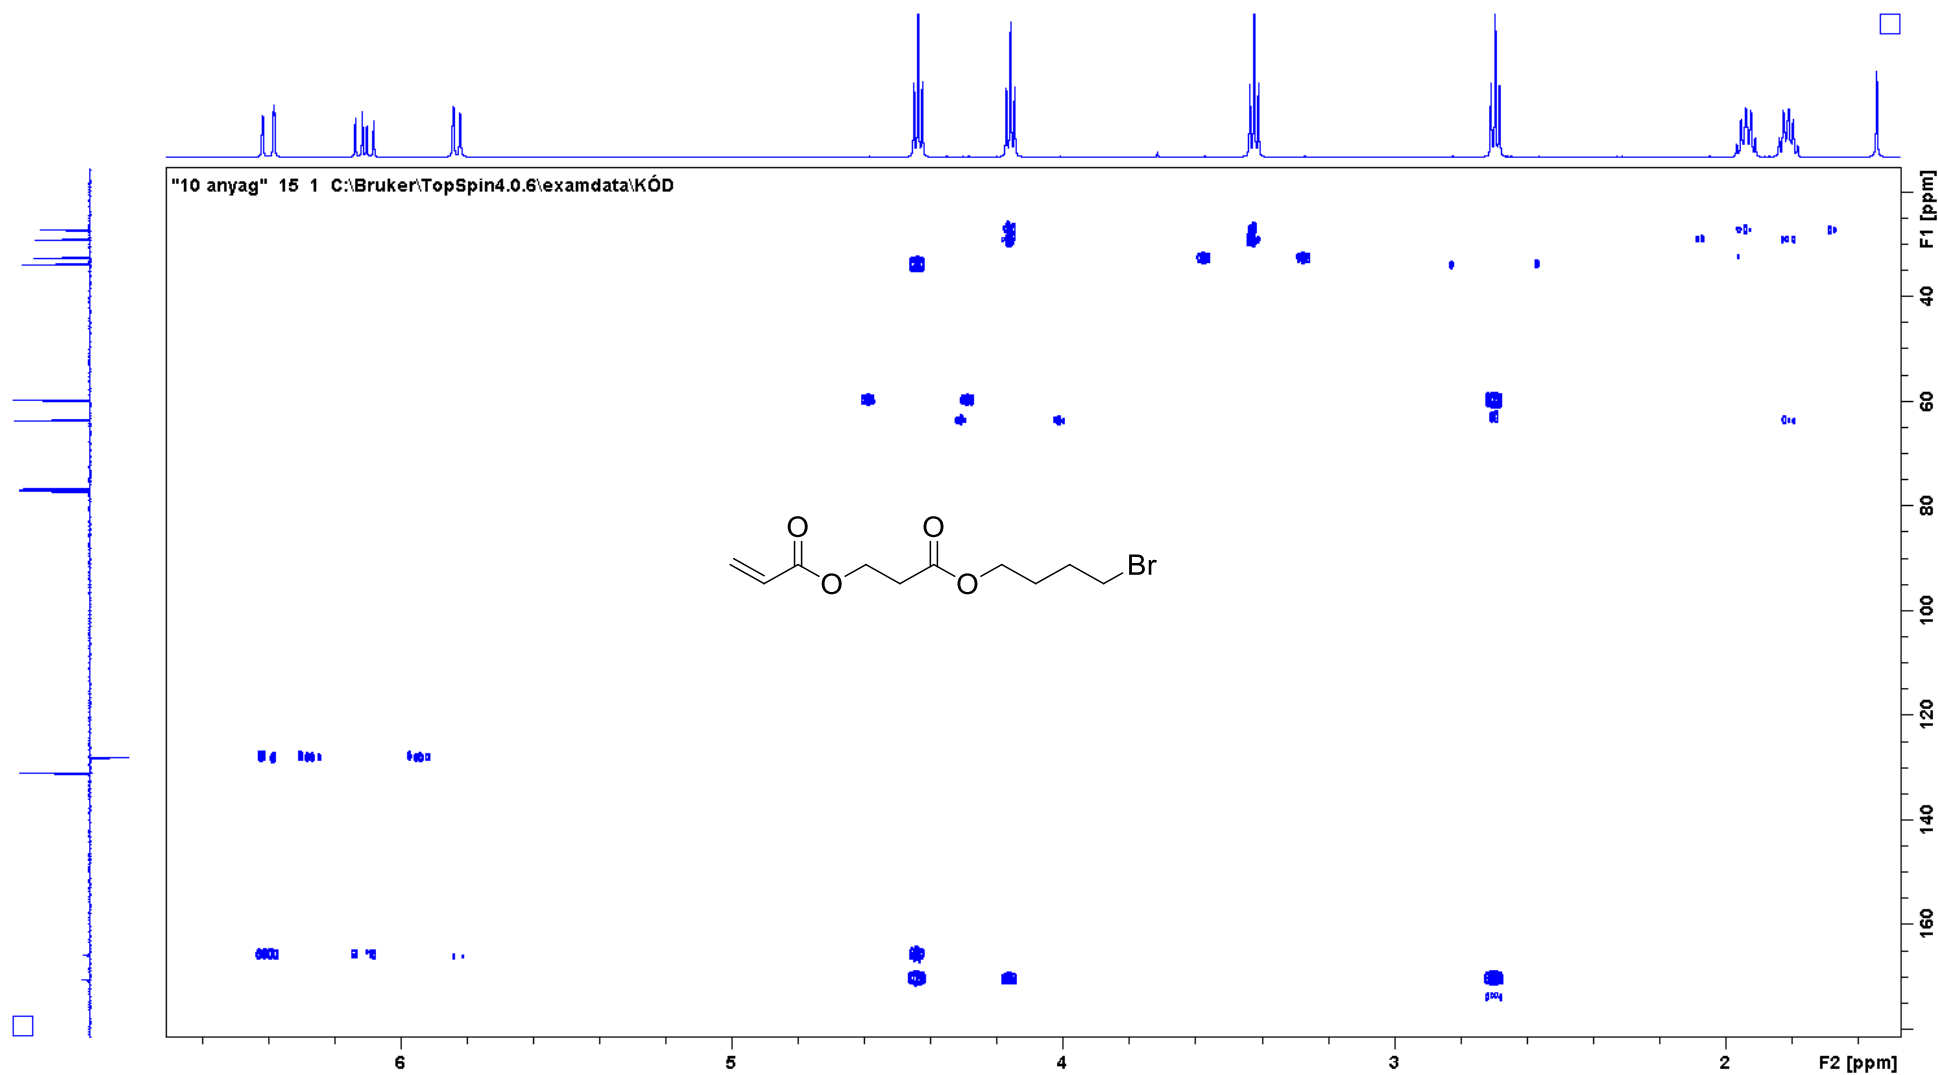

Figure S40

$^1\text{H}$ -NMR of compound (4*R*,4*aS*,6*aS*,7*R*,8*R*,9*S*,11*bS*)-4-(Acryloyloxy)butyl 7-(((*tert*-butoxycarbonyl)(4-fluorobenzyl)amino)methyl)-8-hydroxy-4,9,11*b*-trimethyltetradecahydro-6*a*,9-methanocyclohepta[*a*]naphthalene-4-carboxylate (**11**):

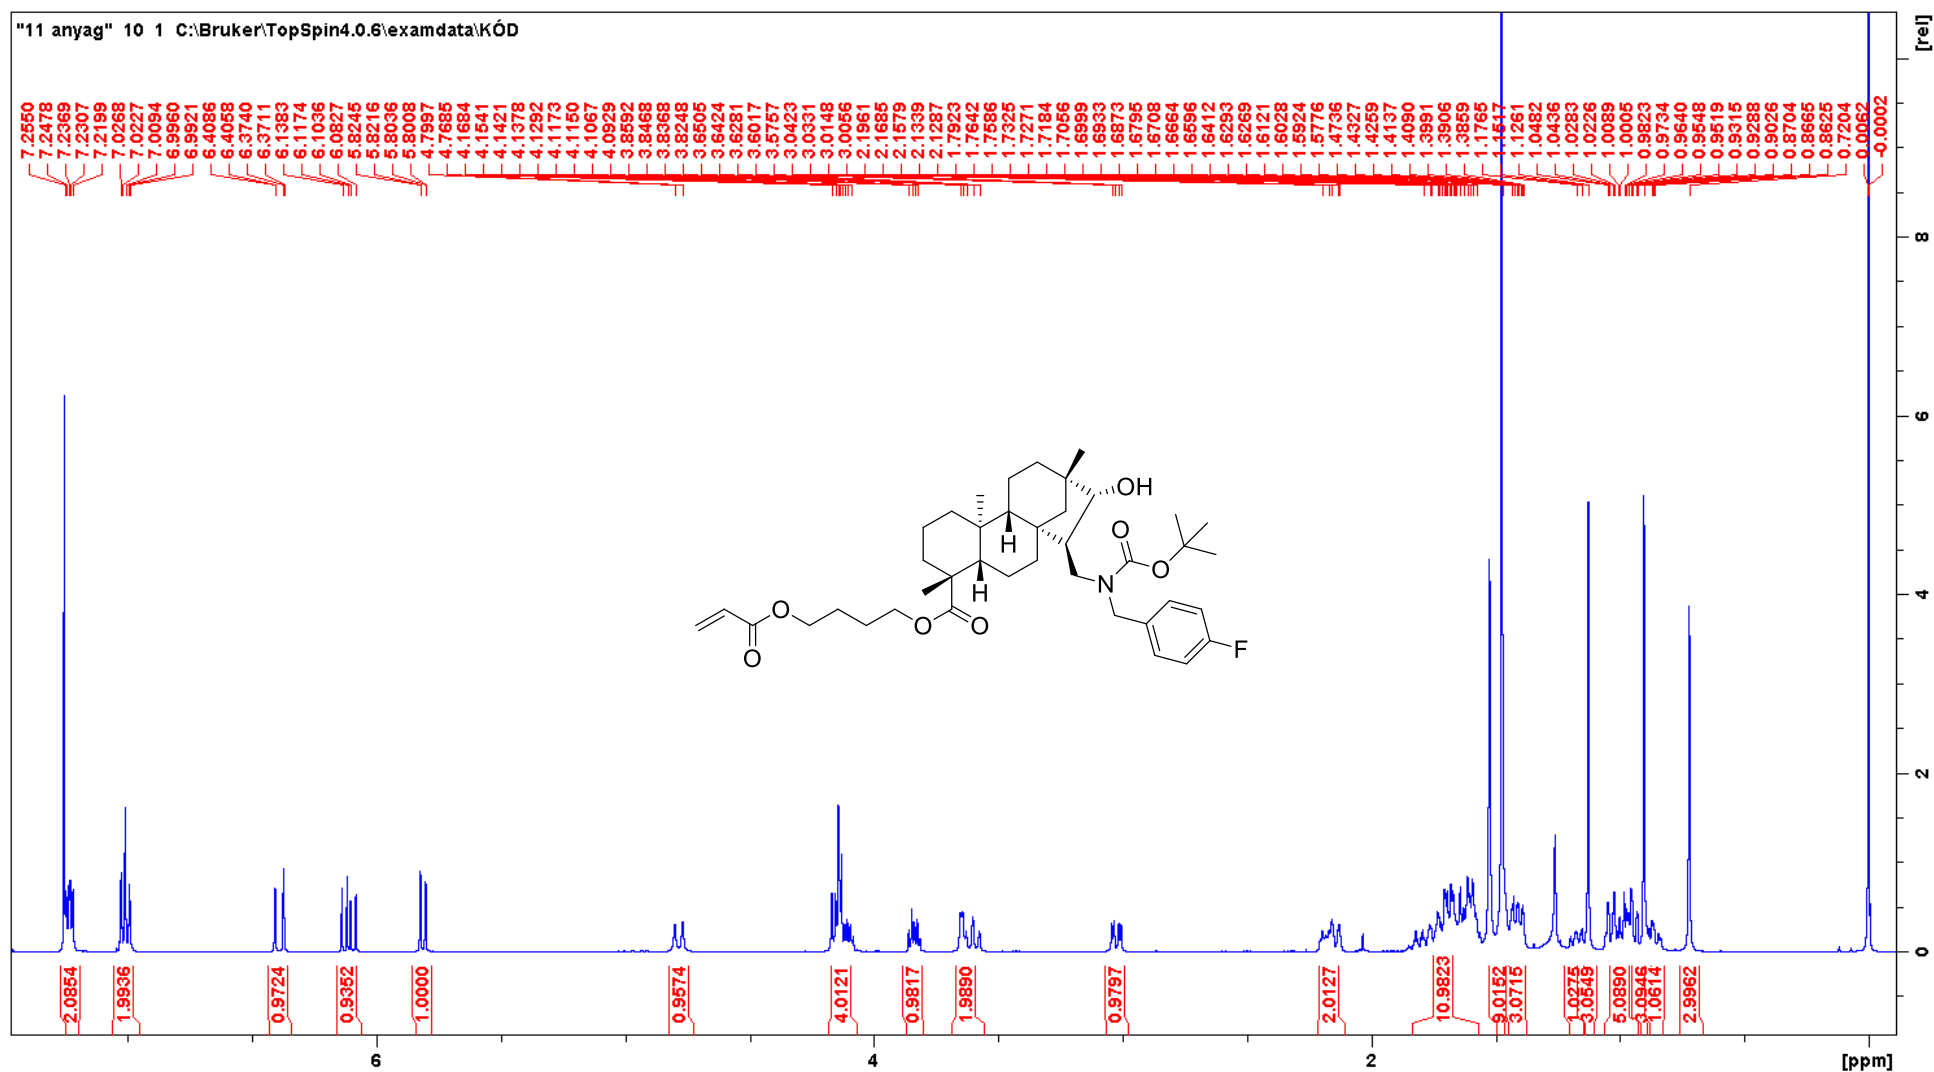

Figure S41

$^{13}\text{C}$ -NMR of compound (4*R*,4*aS*,6*aS*,7*R*,8*R*,9*S*,11*bS*)-4-(Acryloyloxy)butyl 7-(((*tert*-butoxycarbonyl)(4-fluorobenzyl)amino)methyl)-8-hydroxy-4,9,11*b*-trimethyltetradecahydro-6*a*,9-methanocyclohepta[*a*]naphthalene-4-carboxylate (**11**):

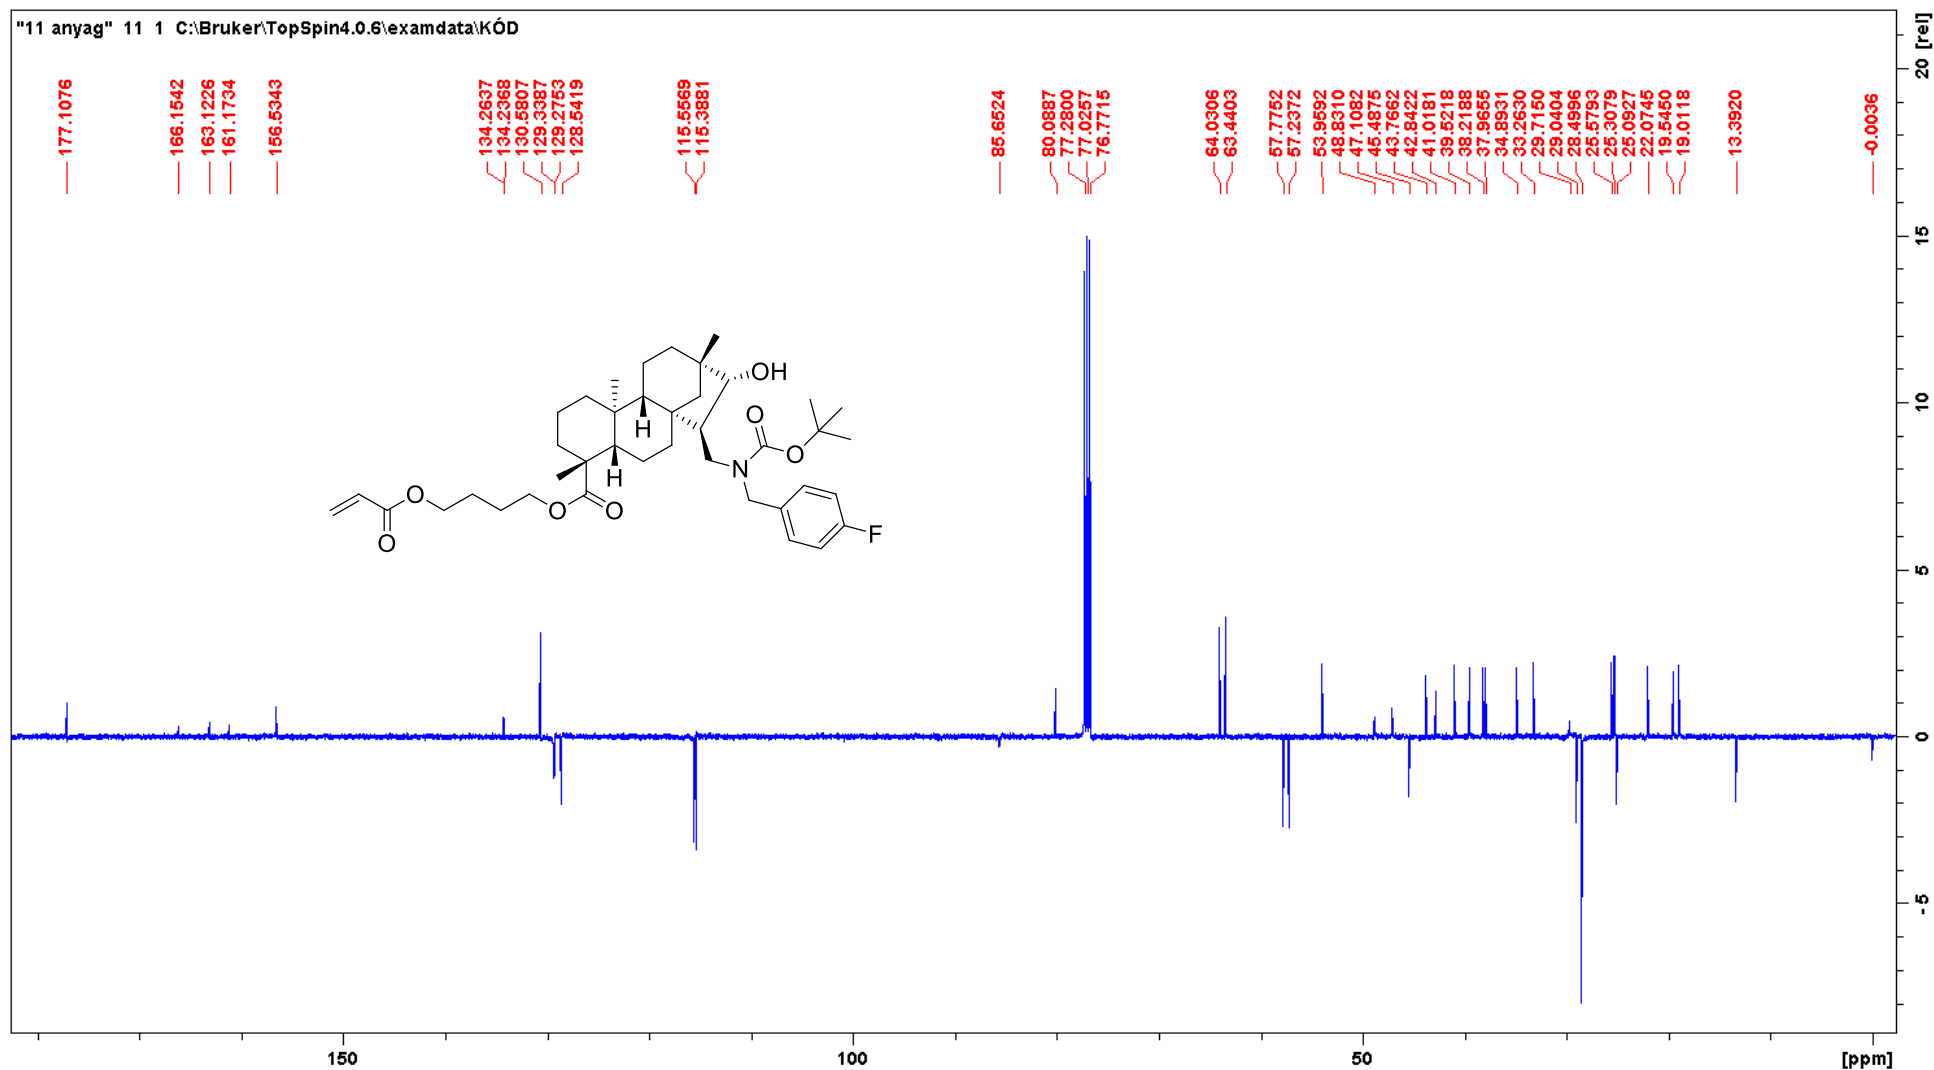

Figure S42

COSY of compound (4*R*,4*aS*,6*aS*,7*R*,8*R*,9*S*,11*bS*)-4-(Acryloyloxy)butyl 7-(((*tert*-butoxycarbonyl)(4-fluorobenzyl)amino)methyl)-8-hydroxy-4,9,11*b*-trimethyltetradecahydro-6*a*,9-methanocyclohepta[*a*]naphthalene-4-carboxylate (**11**):

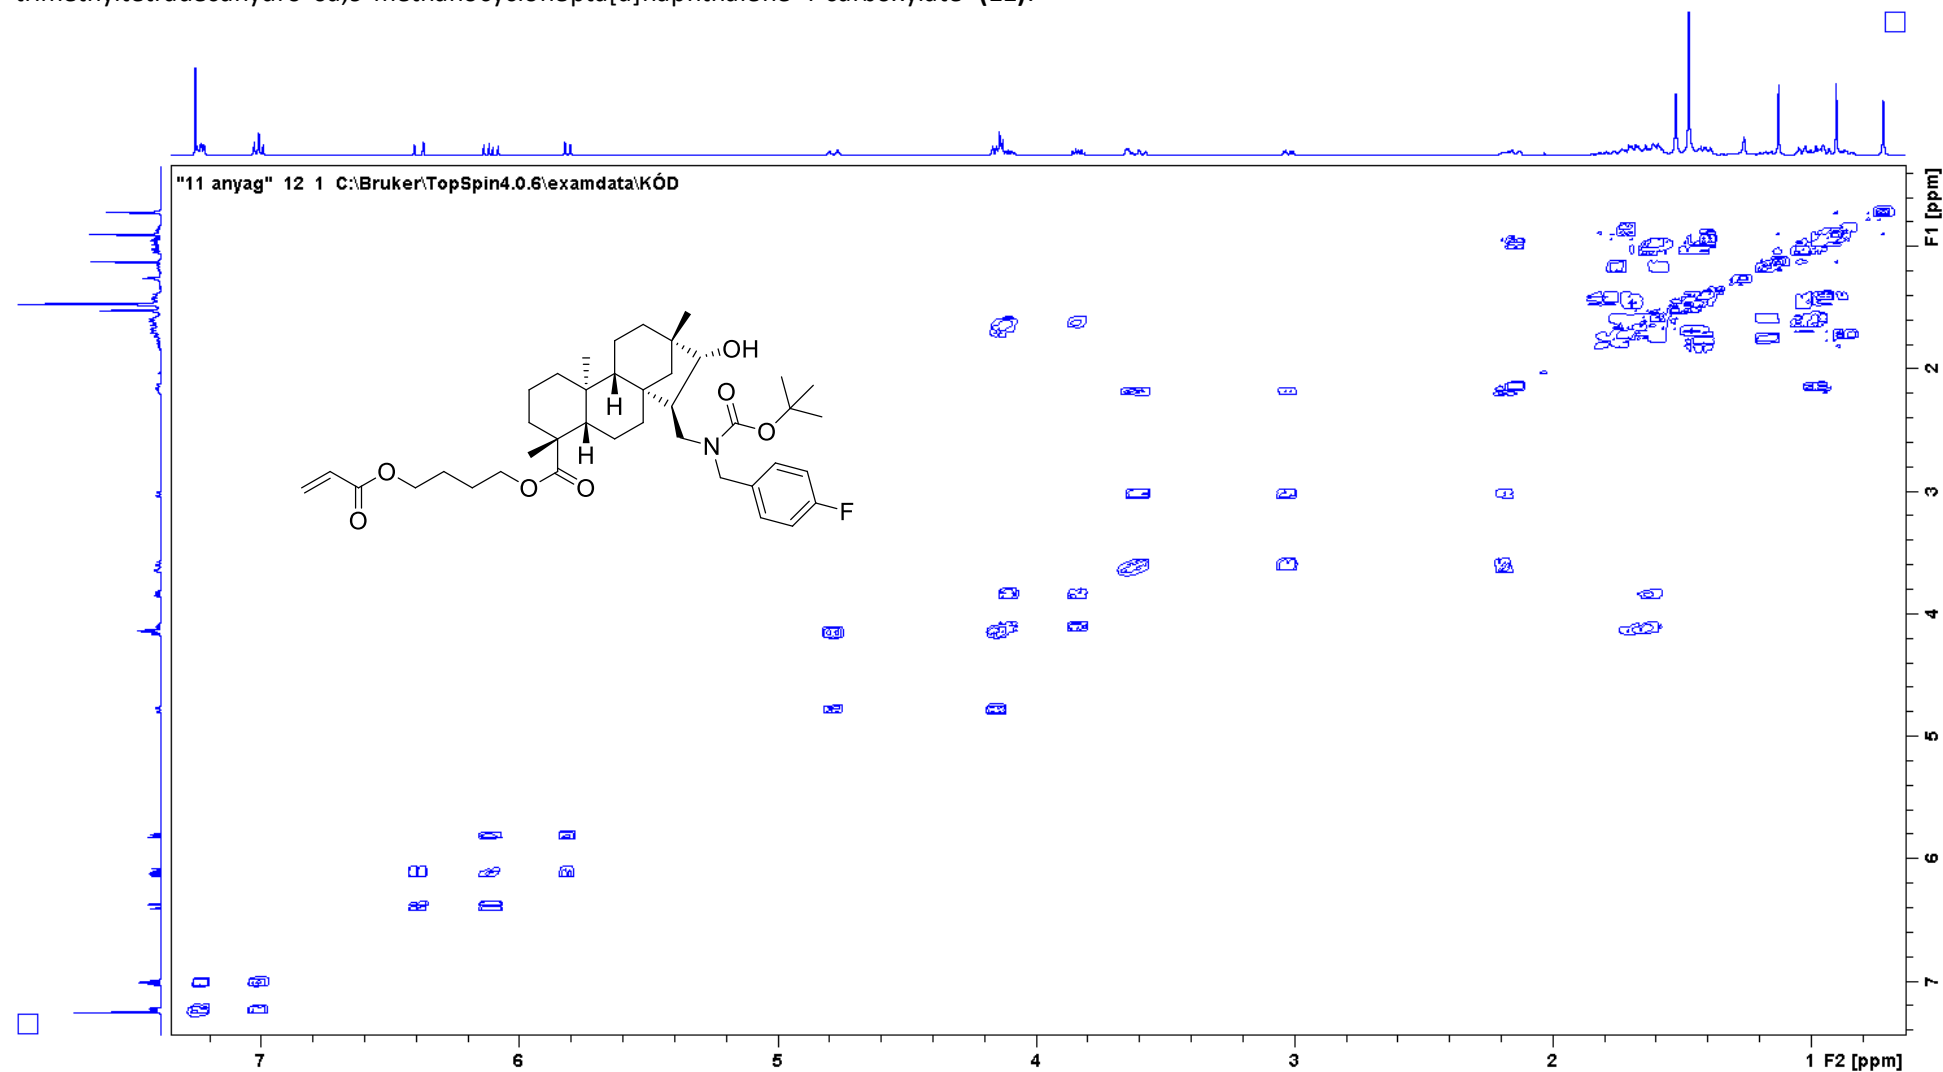

Figure S43

NOESY of compound (4*R*,4*a**S*,6*a**S*,7*R*,8*R*,9*S*,11*b**S*)-4-(Acryloyloxy)butyl 7-(((*tert*-butoxycarbonyl)(4-fluorobenzyl)amino)methyl)-8-hydroxy-4,9,11*b*-trimethyltetradecahydro-6*a*,9-methanocyclohepta[*a*]naphthalene-4-carboxylate (**11**):

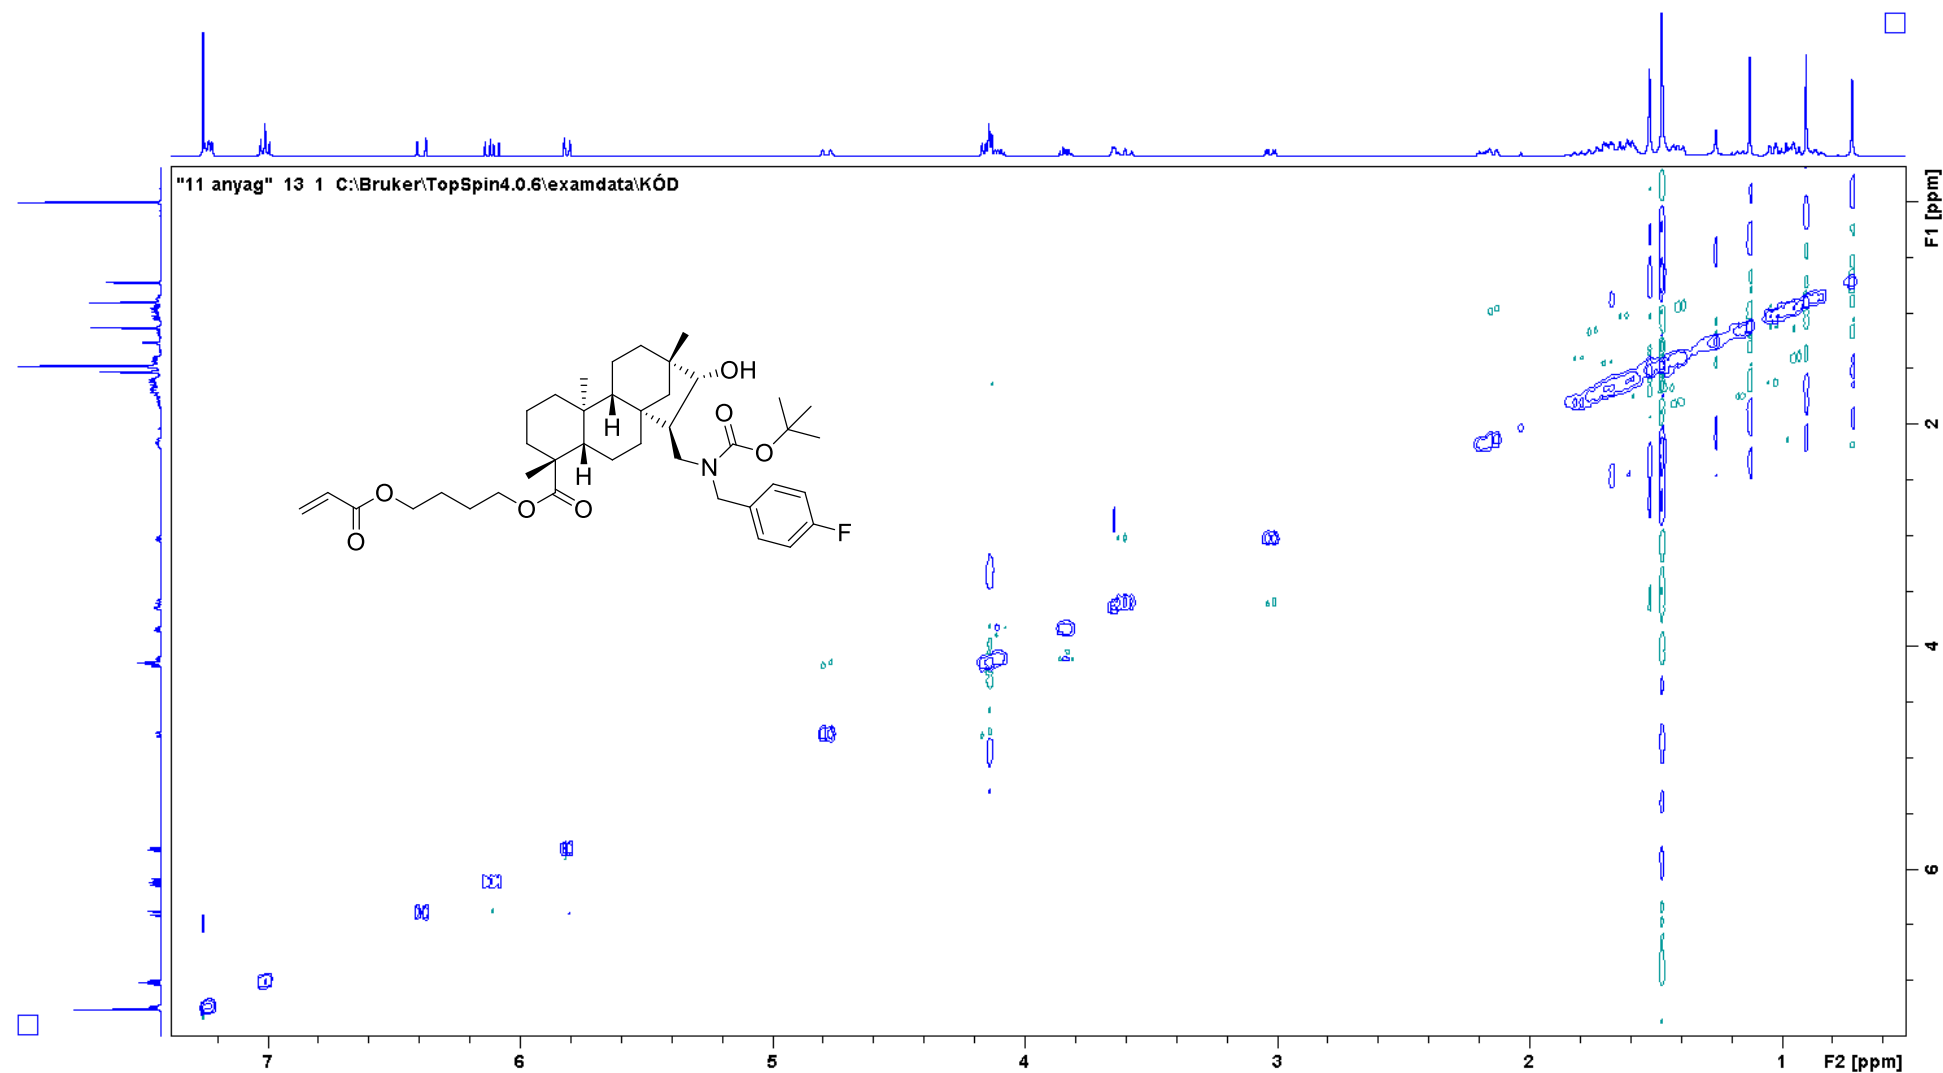

Figure S44

HSQC of compound (4*R*,4*aS*,6*aS*,7*R*,8*R*,9*S*,11*bS*)-4-(Acryloyloxy)butyl 7-(((*tert*-butoxycarbonyl)(4-fluorobenzyl)amino)methyl)-8-hydroxy-4,9,11*b*-trimethyltetradecahydro-6*a*,9-methanocyclohepta[*a*]naphthalene-4-carboxylate (**11**):

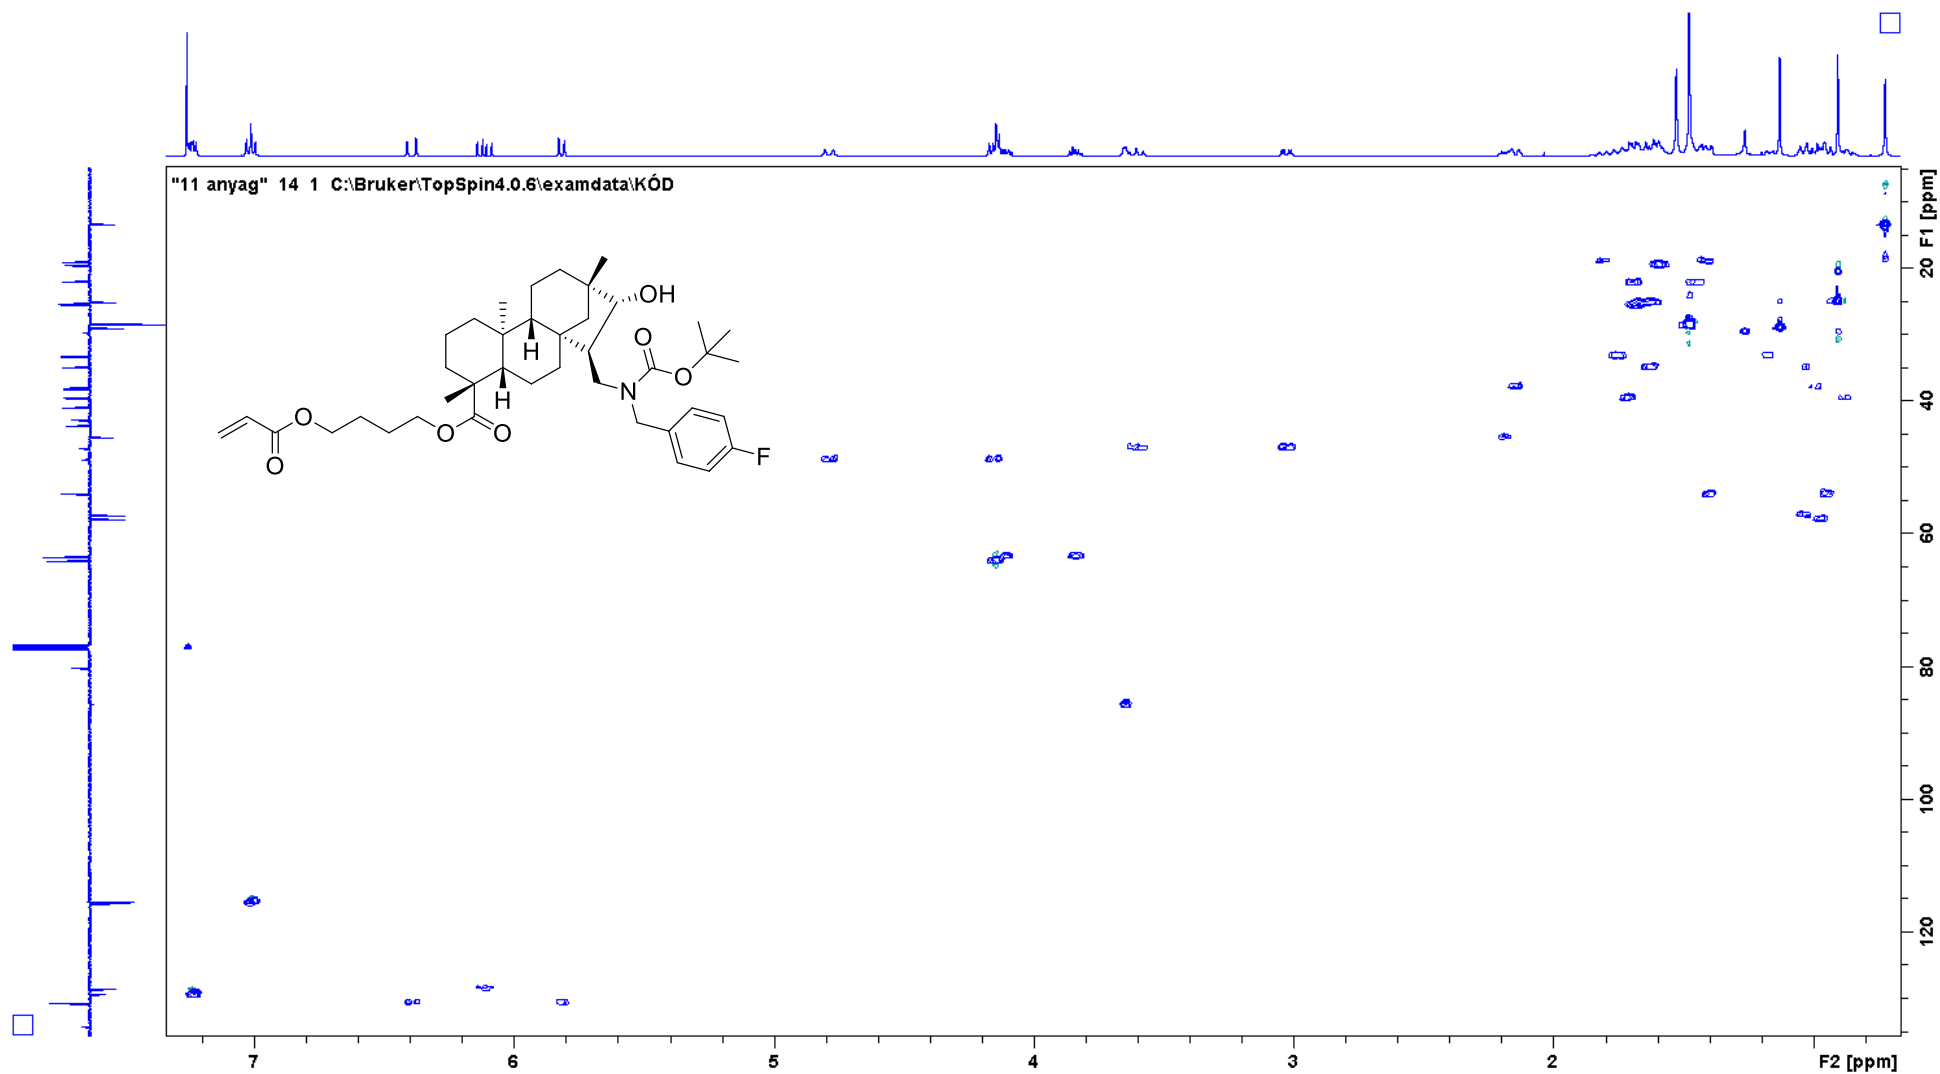

Figure S45

HMBC of compound (4*R*,4*aS*,6*aS*,7*R*,8*R*,9*S*,11*bS*)-4-(Acryloyloxy)butyl 7-(((*tert*-butoxycarbonyl)(4-fluorobenzyl)amino)methyl)-8-hydroxy-4,9,11*b*-trimethyltetradecahydro-6*a*,9-methanocyclohepta[*a*]naphthalene-4-carboxylate (**11**):

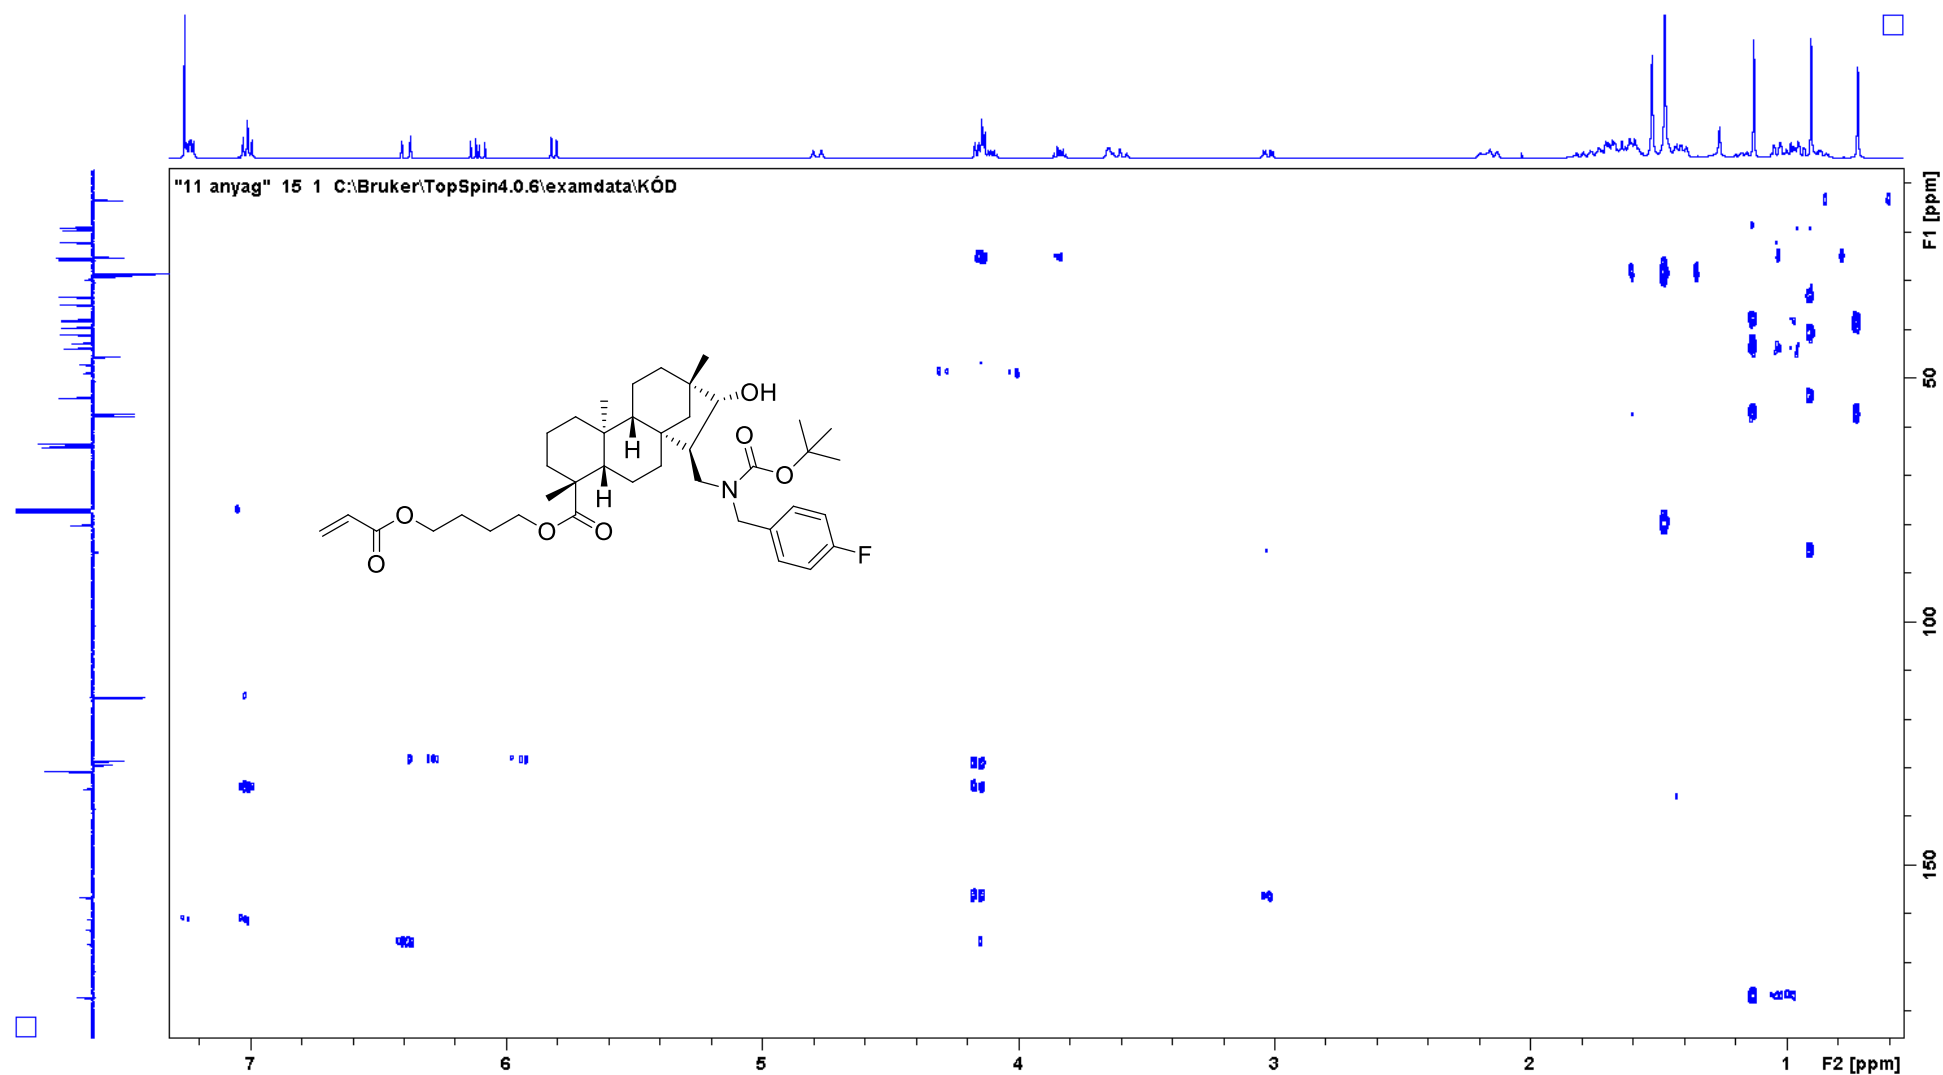



Figure S46

$^{19}\text{F}$ -NMR of compound (4*R*,4*aS*,6*aS*,7*R*,8*R*,9*S*,11*bS*)-4-(Acryloyloxy)butyl 7-(((*tert*-butoxycarbonyl)(4-fluorobenzyl)amino)methyl)-8-hydroxy-4,9,11*b*-trimethyltetradecahydro-6*a*,9-methanocyclohepta[*a*]naphthalene-4-carboxylate (**11**):

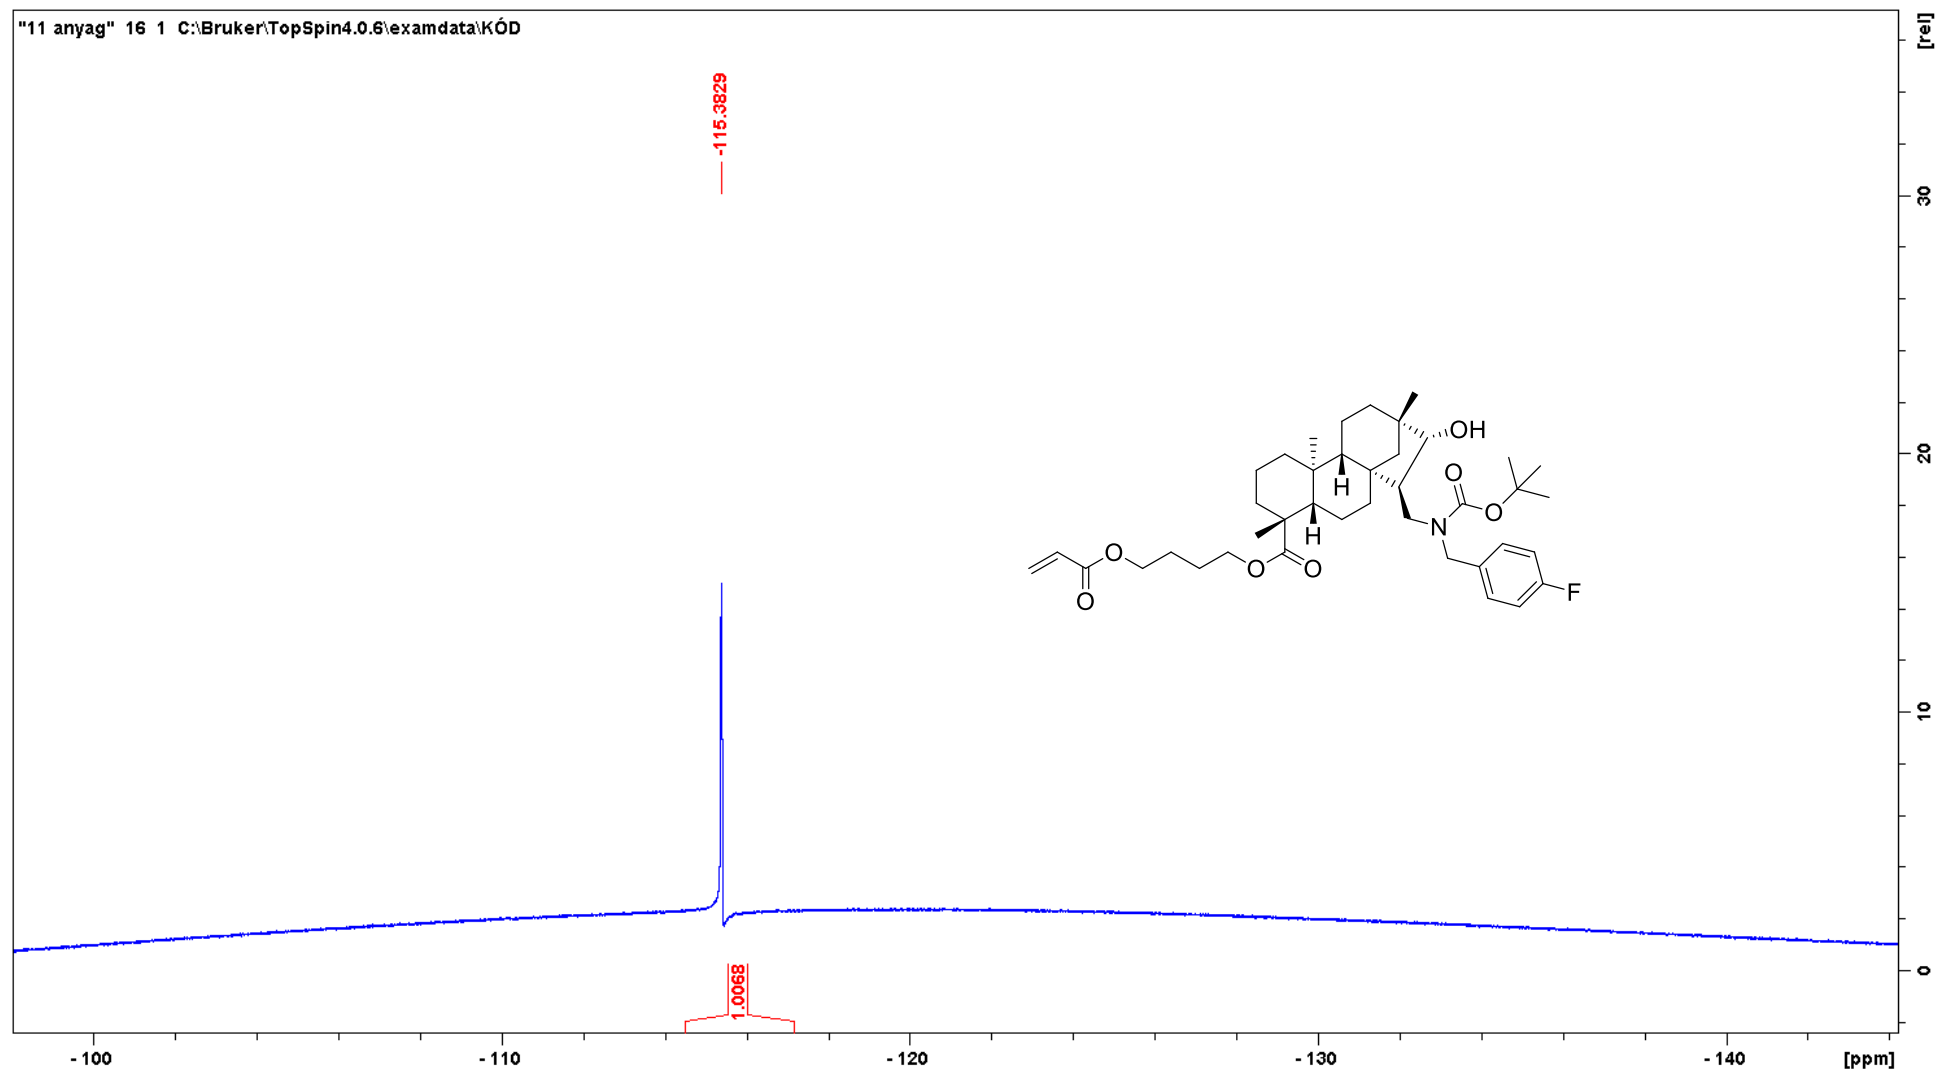

Figure S47

<sup>1</sup>H-NMR of compound (4*R*,4*aS*,6*aS*,7*R*,8*R*,9*S*,11*bS*)-4-((3-(Acryloyloxy)propanoyl)oxy)butyl 7-(((*tert*-butoxycarbonyl)(4-fluorobenzyl)amino)methyl)-8-hydroxy-4,9,11*b*-trimethyltetradecahydro-6*a*,9-methanocyclohepta[*a*]naphthalene-4-carboxylate (**12**):

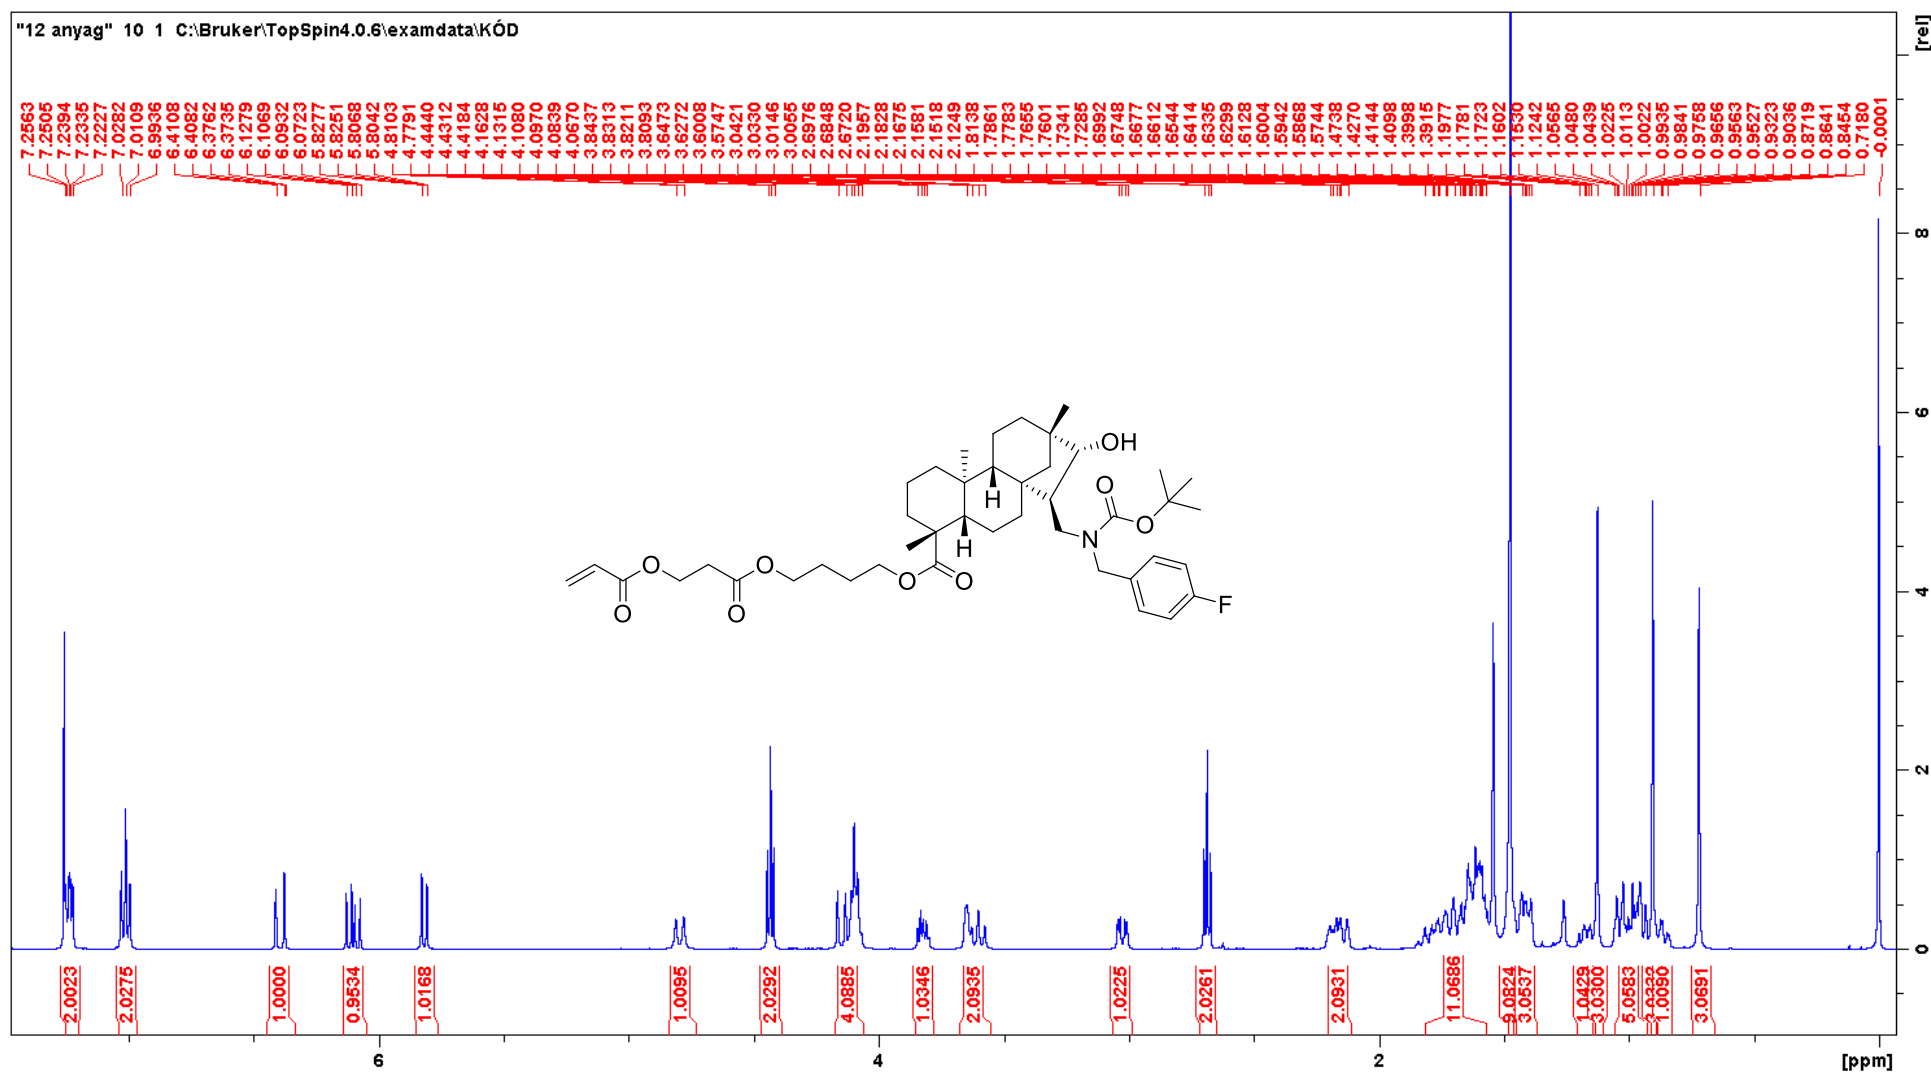

Figure S48

$^{13}\text{C}$ -NMR of compound (4*R*,4*aS*,6*aS*,7*R*,8*R*,9*S*,11*bS*)-4-((3-(Acryloyloxy)propanoyl)oxy)butyl 7-(((*tert*-butoxycarbonyl)(4-fluorobenzyl)amino)methyl)-8-hydroxy-4,9,11*b*-trimethyltetradecahydro-6*a*,9-methanocyclohepta[*a*]naphthalene-4-carboxylate (**12**):

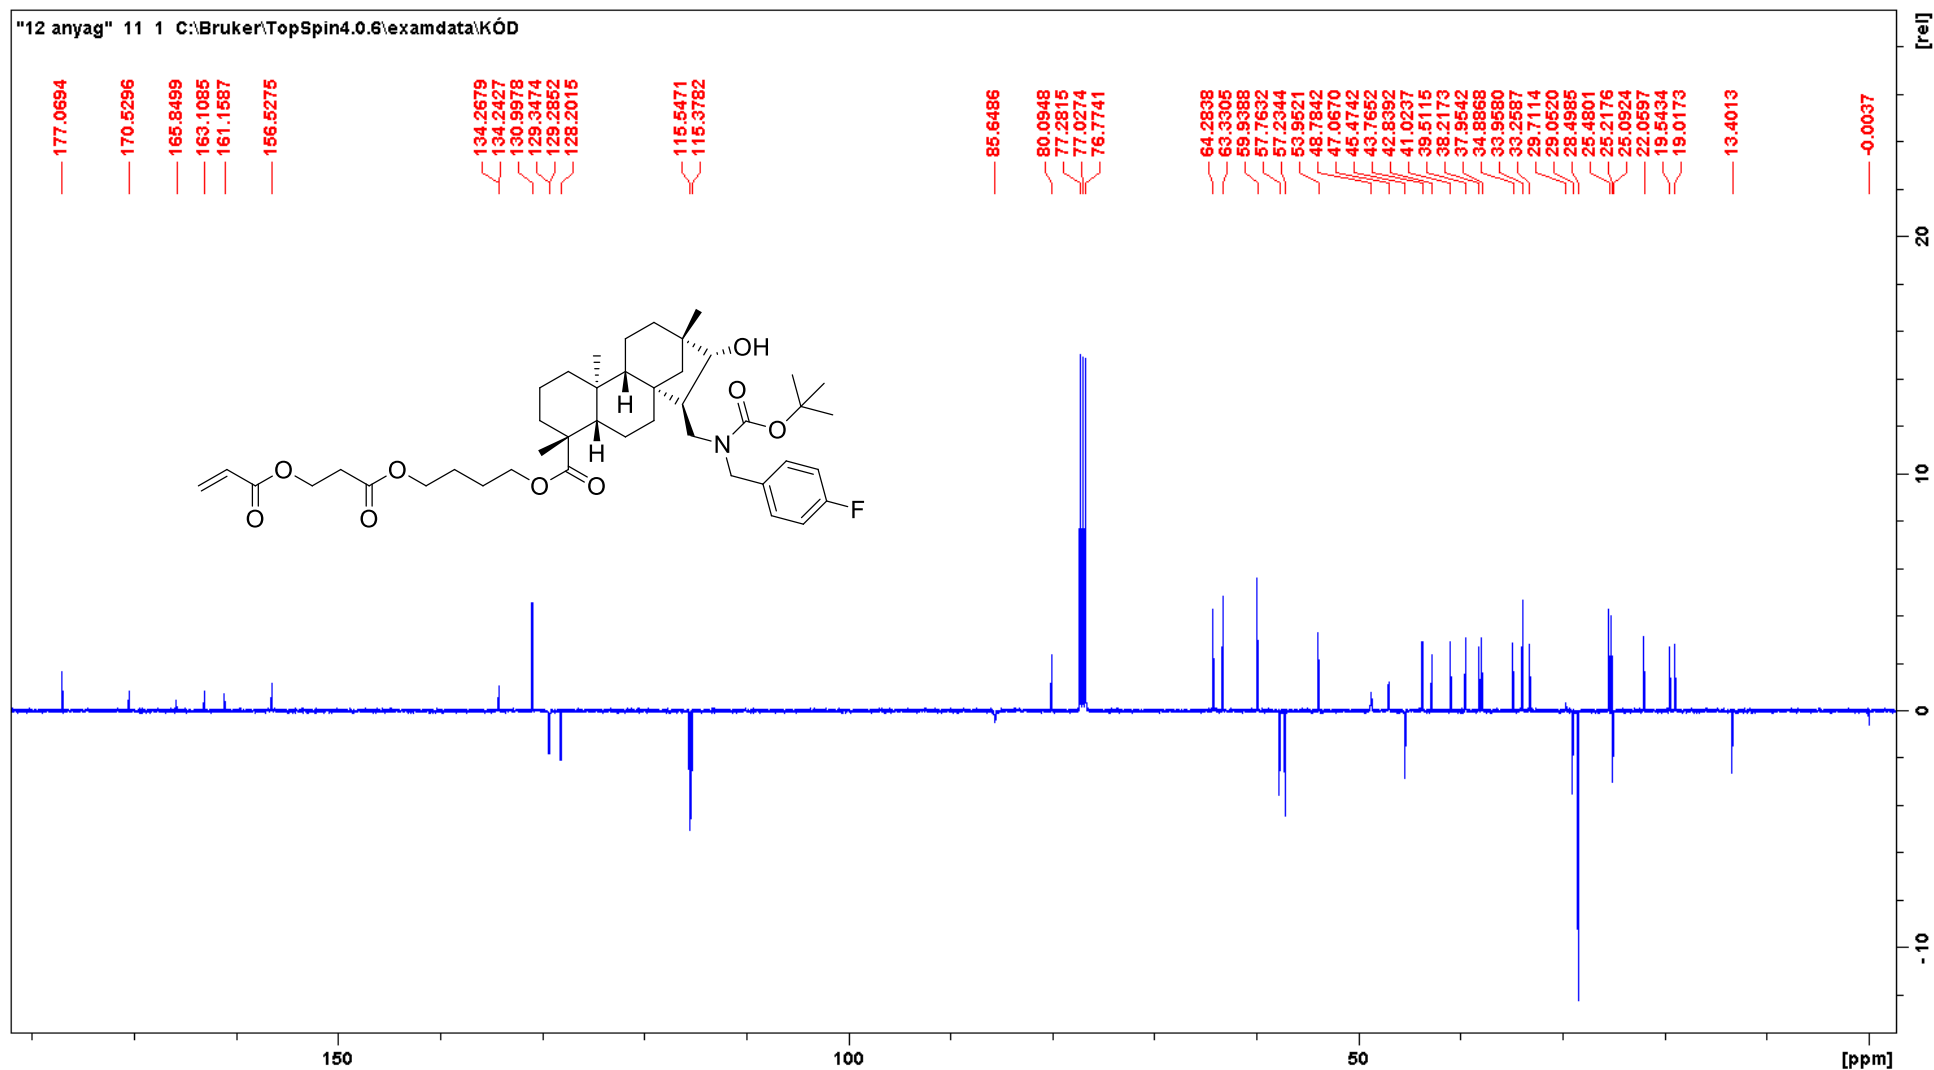

Figure S49

COSY of compound (4*R*,4*aS*,6*aS*,7*R*,8*R*,9*S*,11*bS*)-4-((3-(Acryloyloxy)propanoyl)oxy)butyl 7-(((*tert*-butoxycarbonyl)(4-fluorobenzyl)amino)methyl)-8-hydroxy-4,9,11*b*-trimethyltetradecahydro-6*a*,9-methanocyclohepta[*a*]naphthalene-4-carboxylate (**12**):

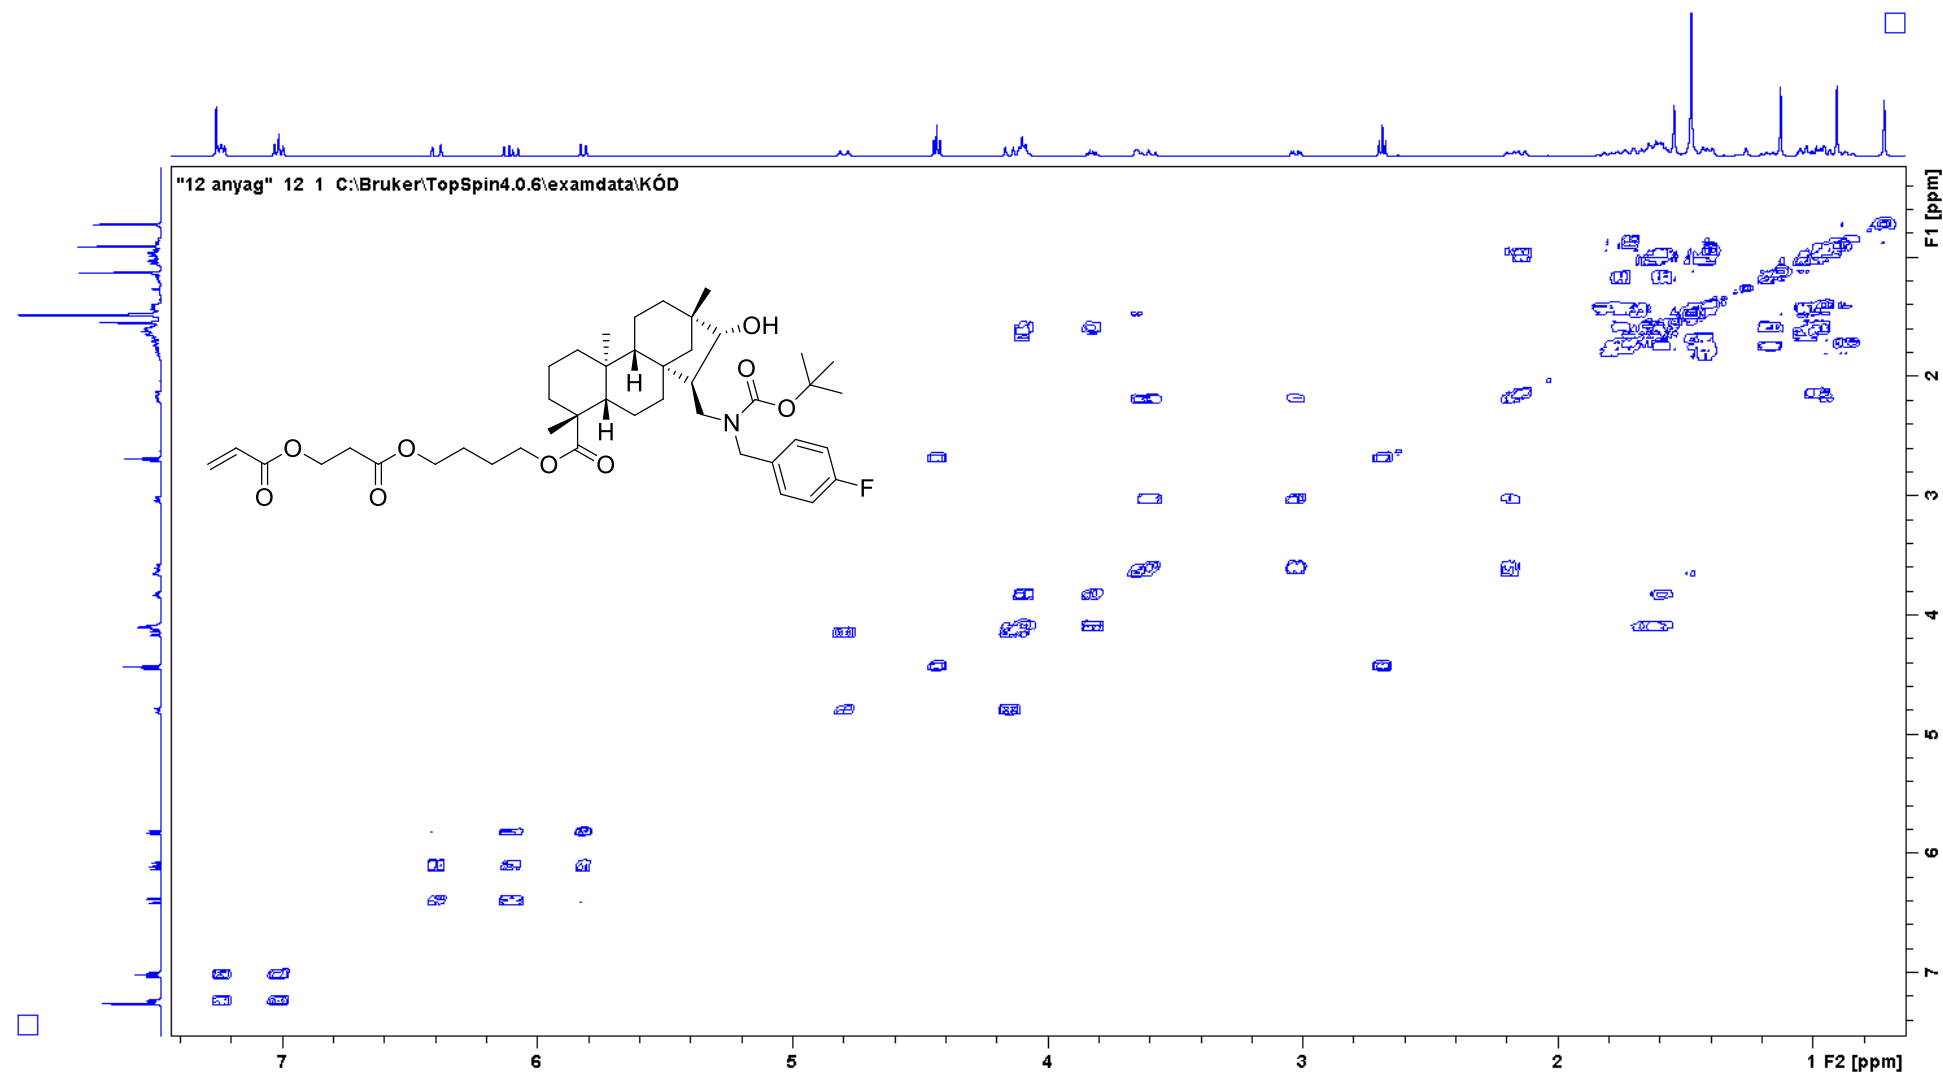

Figure S50

NOESY of compound (4*R*,4*aS*,6*aS*,7*R*,8*R*,9*S*,11*bS*)-4-((3-(Acryloyloxy)propanoyl)oxy)butyl 7-(((*tert*-butoxycarbonyl)(4-fluorobenzyl)amino)methyl)-8-hydroxy-4,9,11*b*-trimethyltetradecahydro-6*a*,9-methanocyclohepta[*a*]naphthalene-4-carboxylate (**12**):

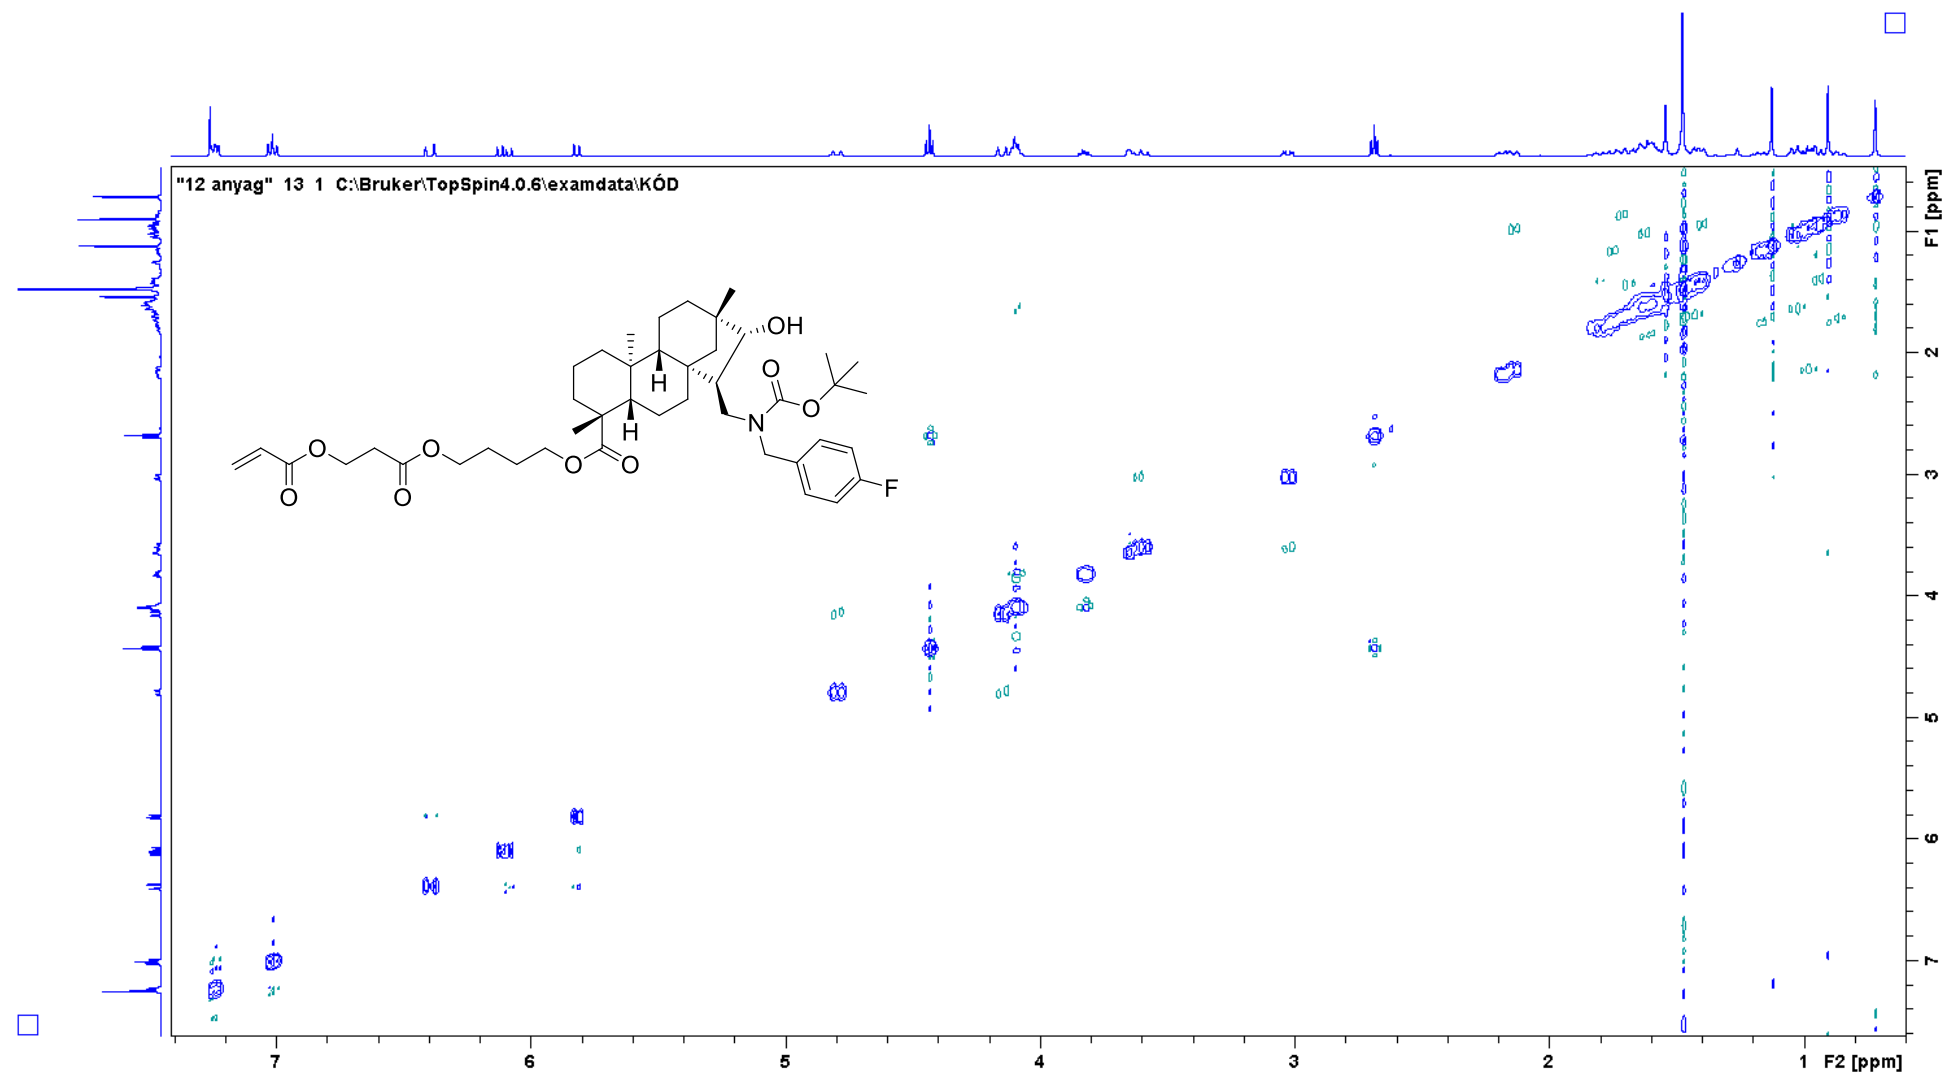

Figure S51

HSQC of compound (4*R*,4*aS*,6*aS*,7*R*,8*R*,9*S*,11*bS*)-4-((3-(Acryloyloxy)propanoyl)oxy)butyl 7-(((*tert*-butoxycarbonyl)(4-fluorobenzyl)amino)methyl)-8-hydroxy-4,9,11*b*-trimethyltetradecahydro-6*a*,9-methanocyclohepta[*a*]naphthalene-4-carboxylate (**12**):

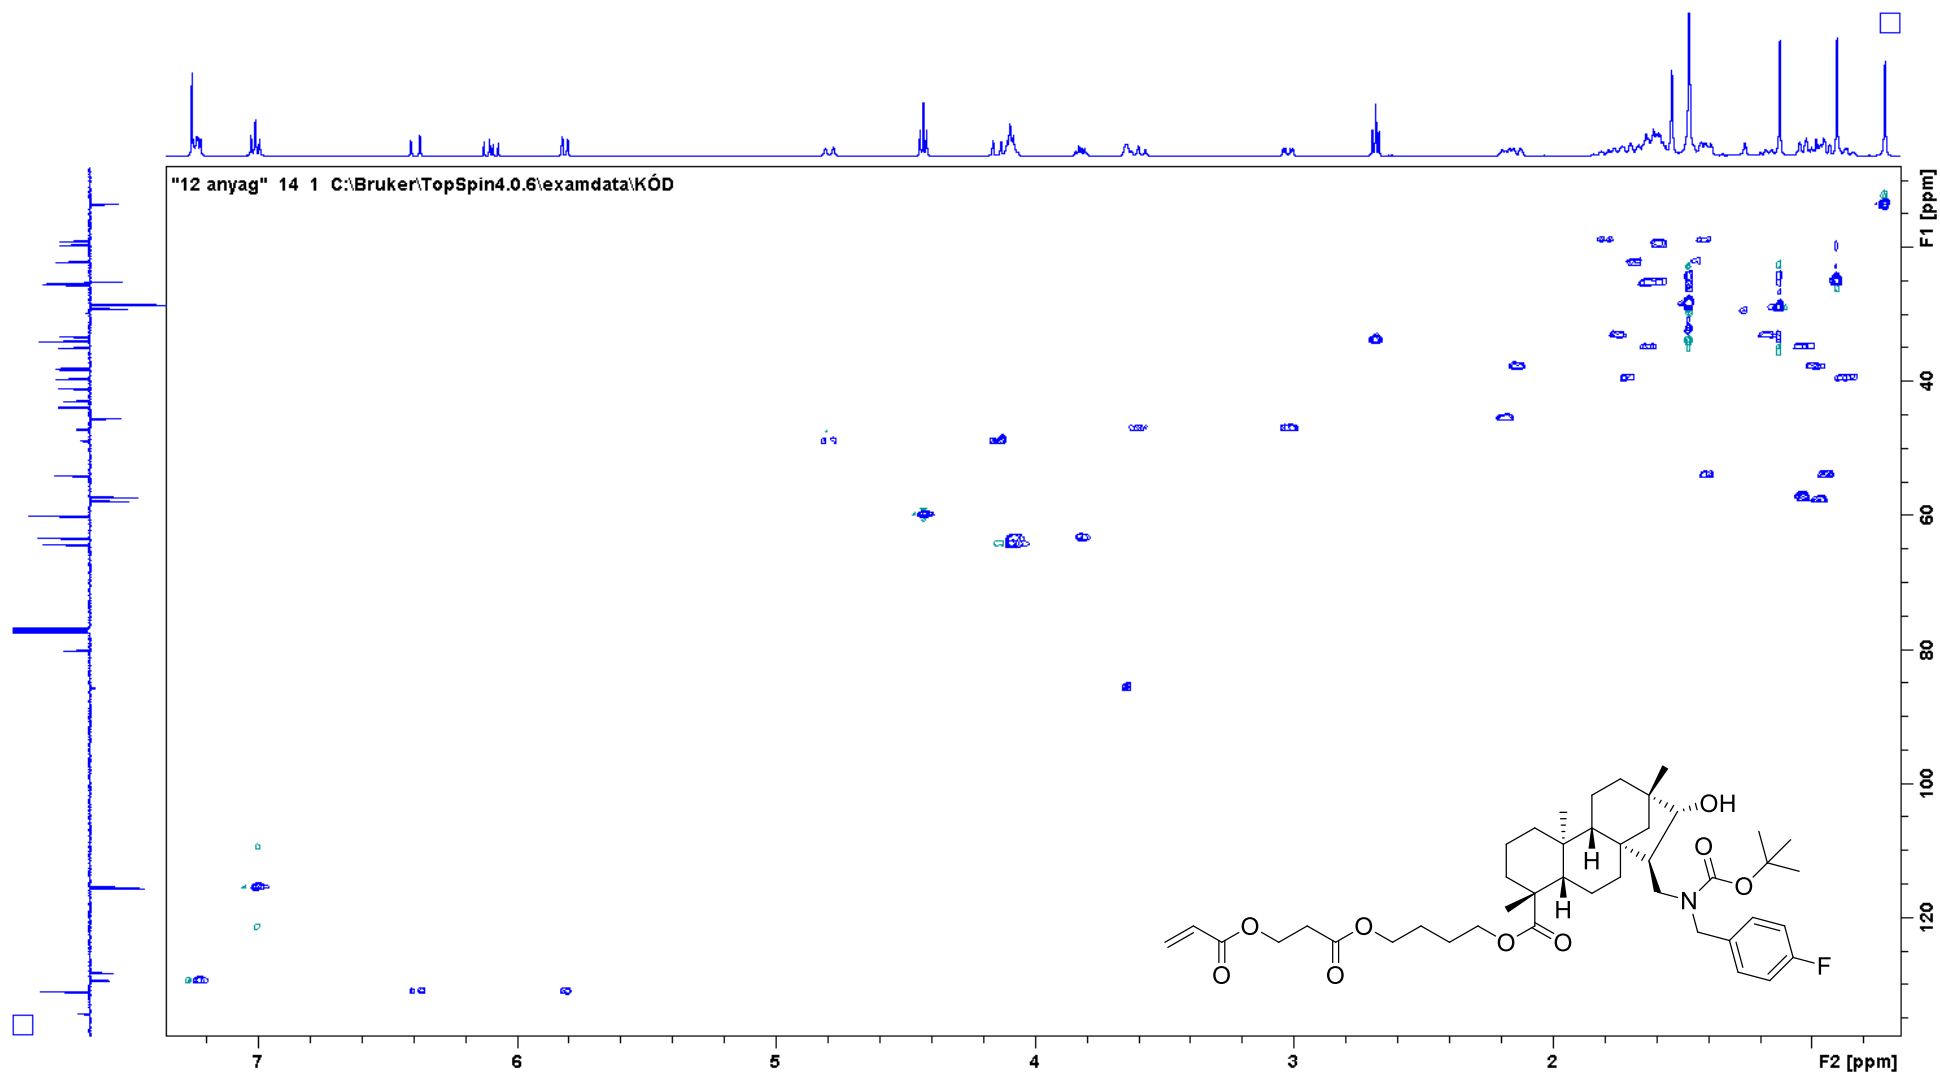

Figure S52

HMBC of compound (4*R*,4*aS*,6*aS*,7*R*,8*R*,9*S*,11*bS*)-4-((3-(Acryloyloxy)propanoyl)oxy)butyl 7-(((*tert*-butoxycarbonyl)(4-fluorobenzyl)amino)methyl)-8-hydroxy-4,9,11*b*-trimethyltetradecahydro-6*a*,9-methanocyclohepta[*a*]naphthalene-4-carboxylate (**12**):

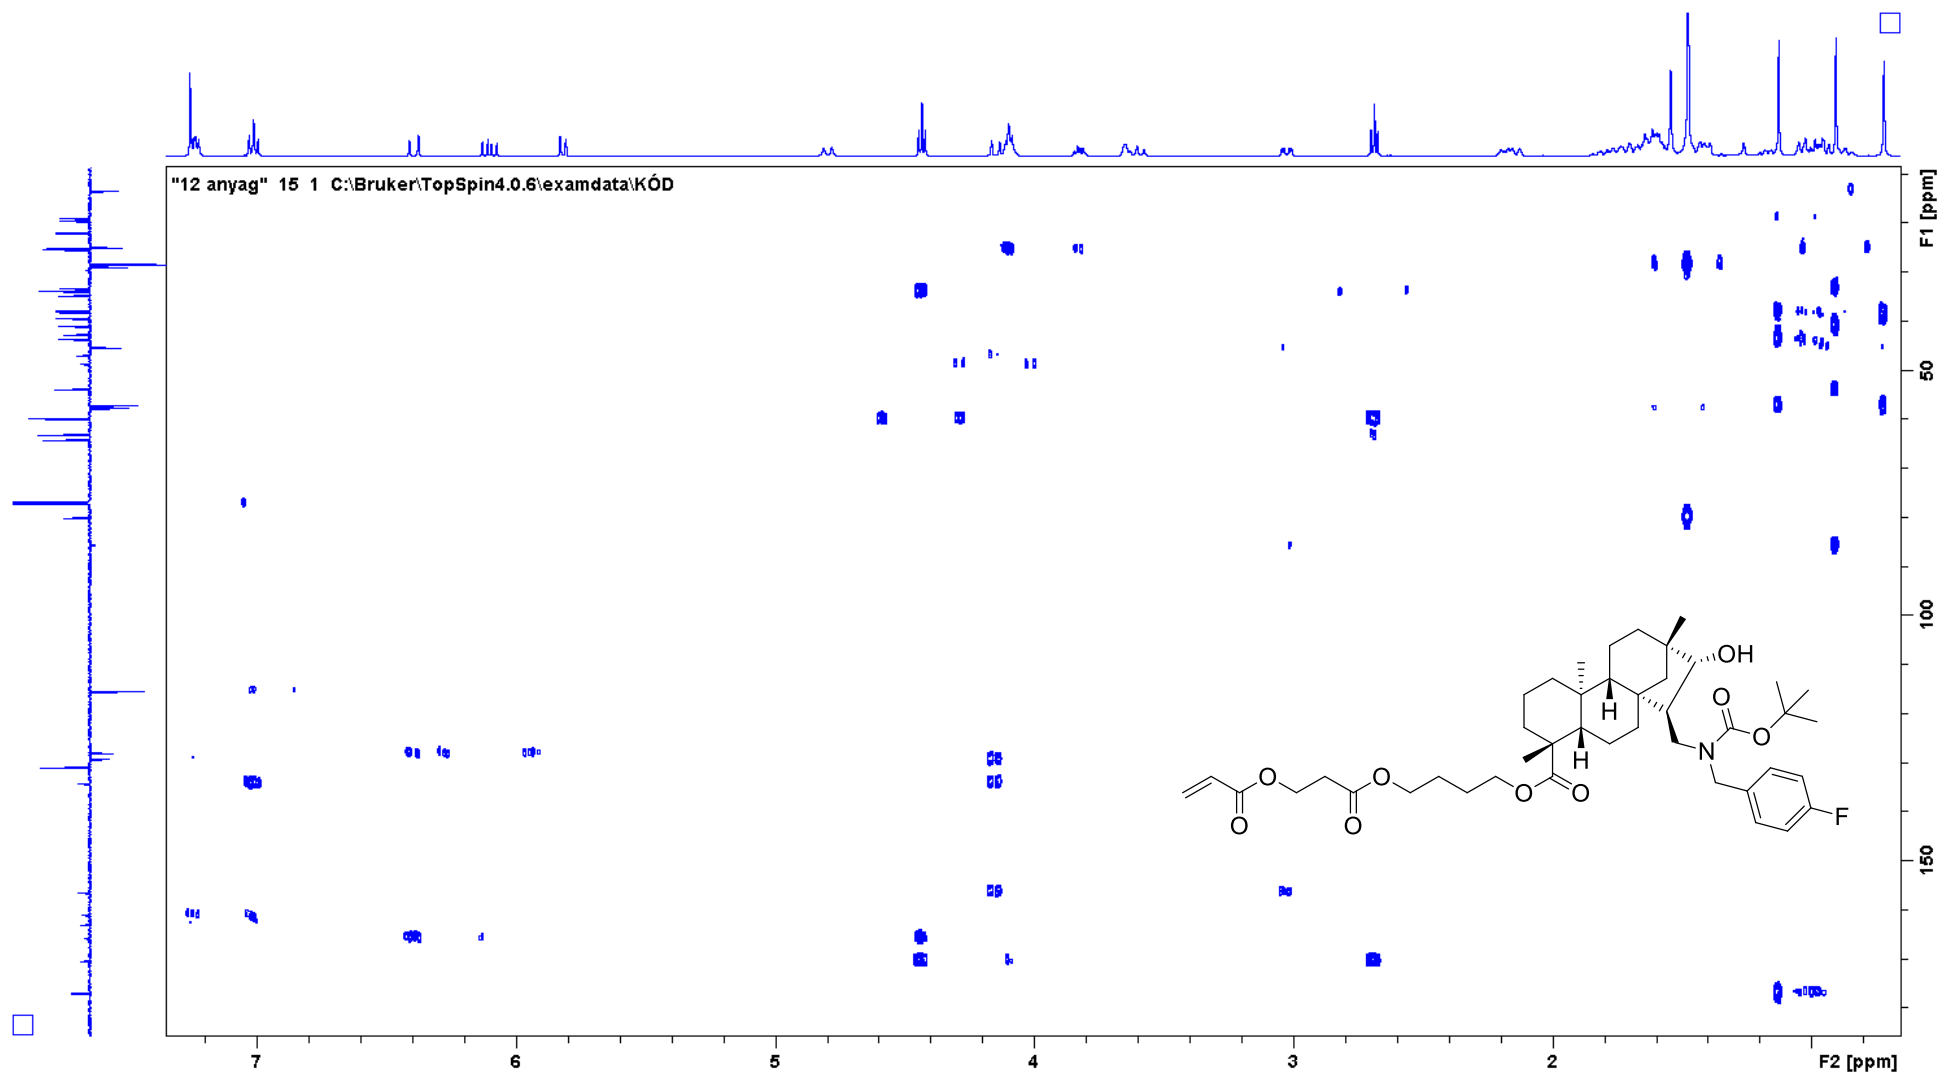

Figure S53

$^{19}\text{F}$ -NMR of compound (4*R*,4*aS*,6*aS*,7*R*,8*R*,9*S*,11*bS*)-4-((3-(Acryloyloxy)propanoyl)oxy)butyl 7-(((*tert*-butoxycarbonyl)(4-fluorobenzyl)amino)methyl)-8-hydroxy-4,9,11*b*-trimethyltetradecahydro-6*a*,9-methanocyclohepta[*a*]naphthalene-4-carboxylate (**12**):

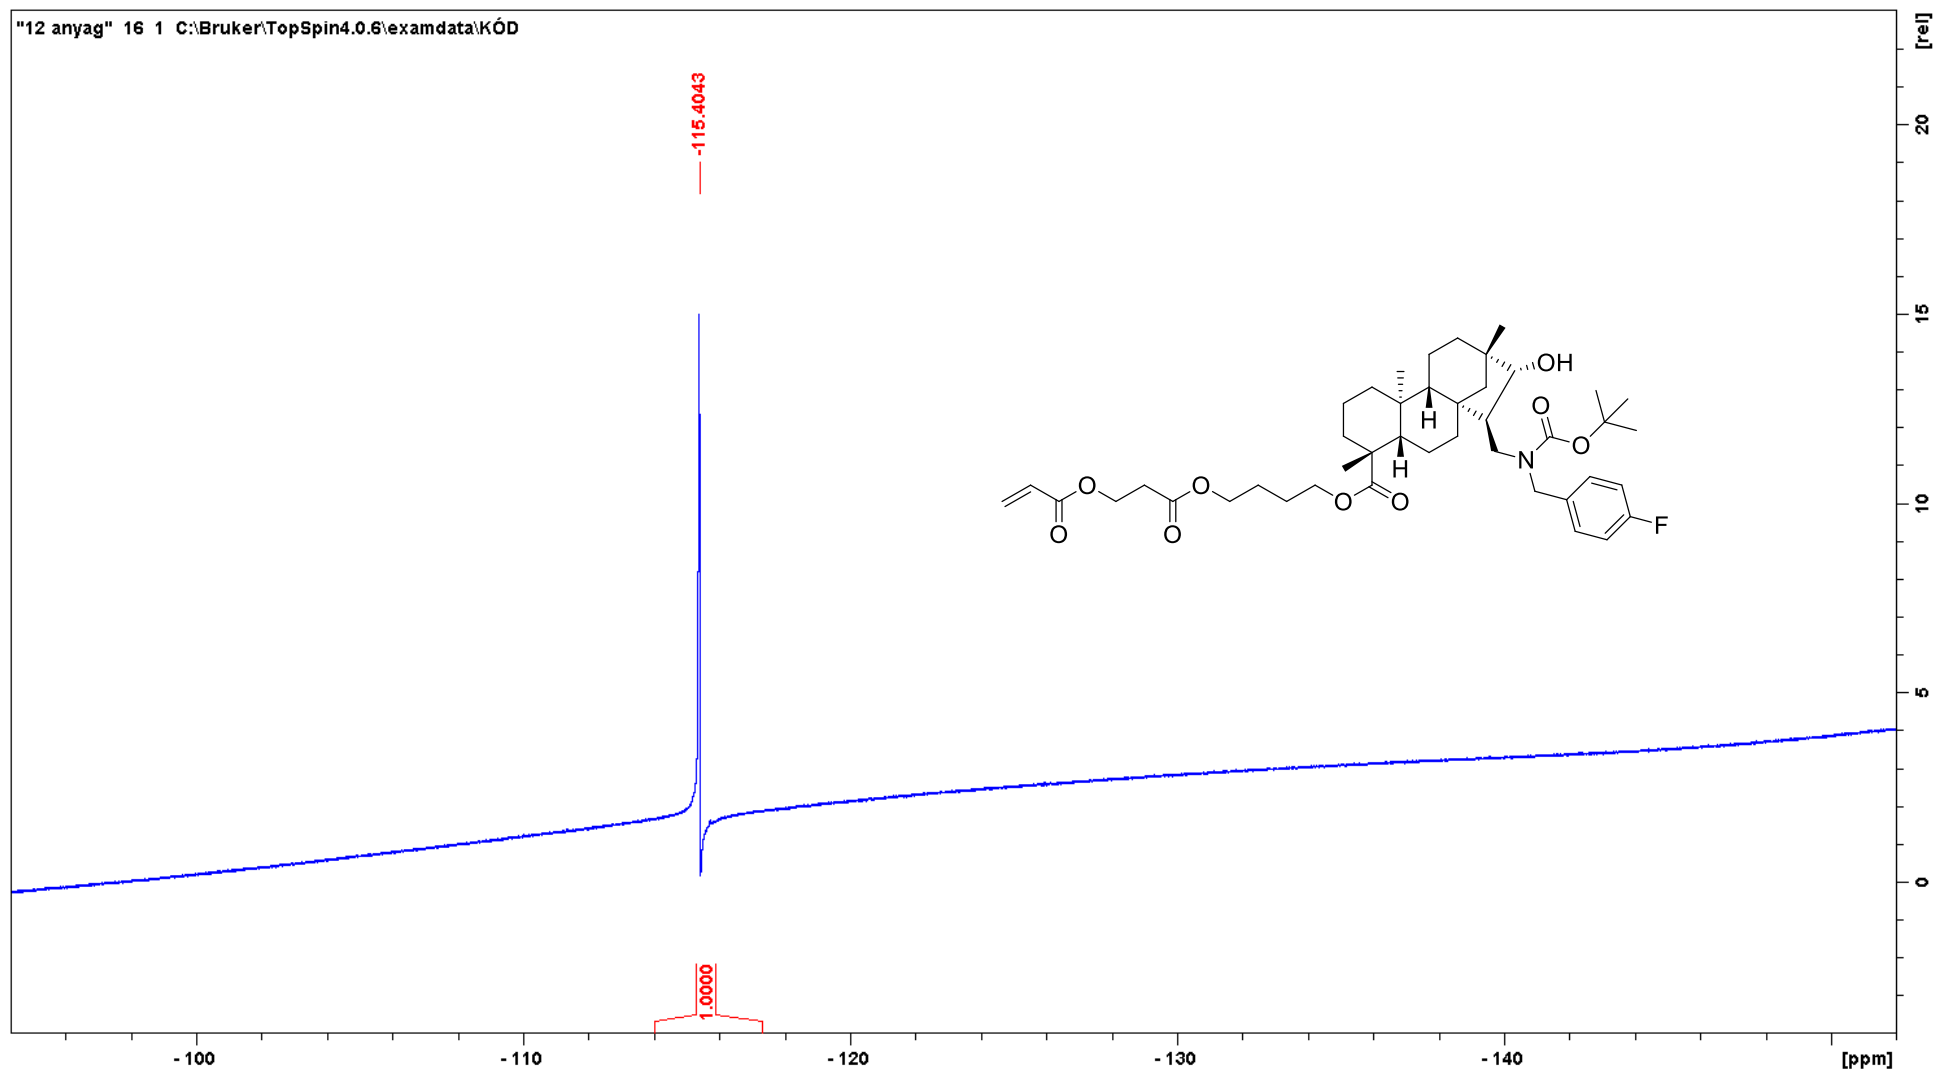



Figure S54

$^1\text{H}$ -NMR of compound (4*R*,4*aS*,6*aS*,7*R*,8*R*,9*S*,11*bS*)-Prop-2-yn-1-yl 7-(((*tert*-butoxycarbonyl)(4-fluorobenzyl)amino)methyl)-8-hydroxy-4,9,11*b*-trimethyltetradecahydro-6*a*,9-methanocyclohepta[*a*]naphthalene-4-carboxylate (**13**):

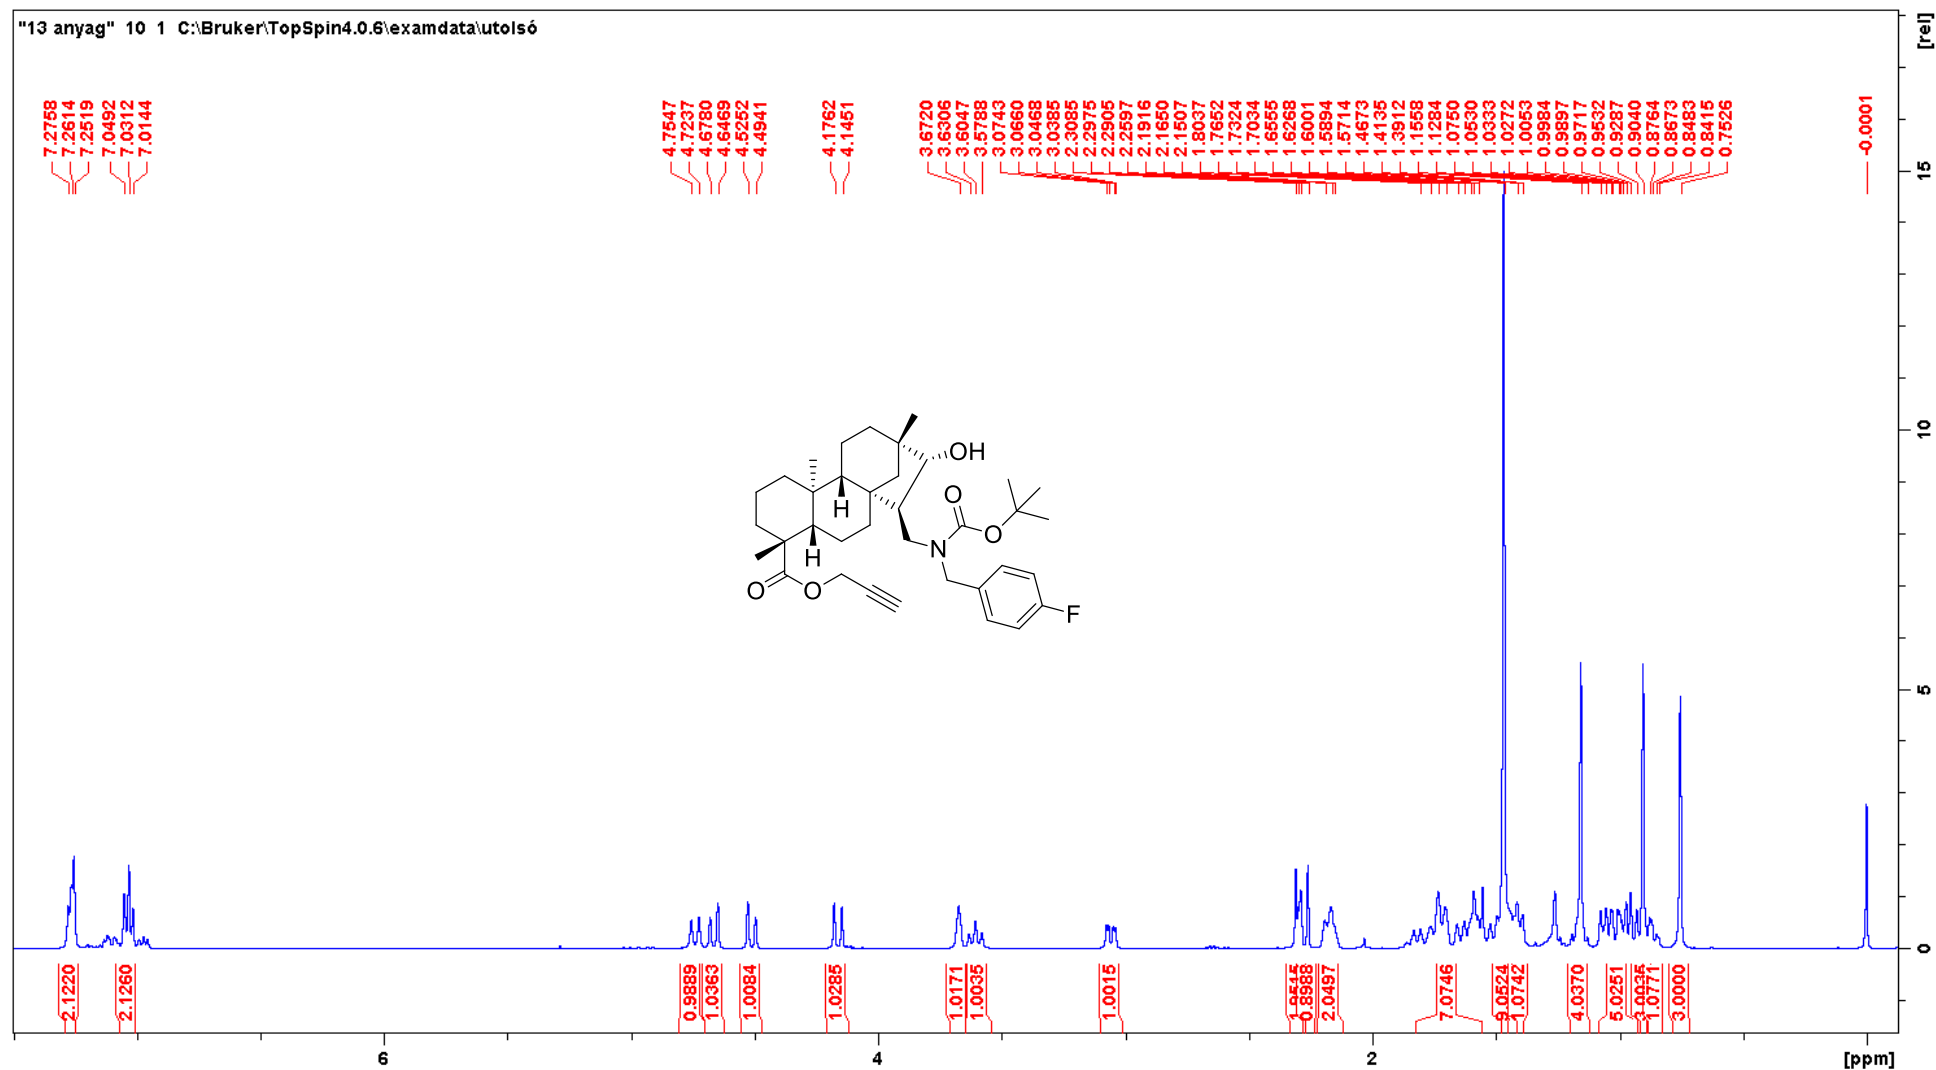

Figure S55

$^{13}\text{C}$ -NMR of compound (4*R*,4*aS*,6*aS*,7*R*,8*R*,9*S*,11*bS*)-Prop-2-yn-1-yl 7-(((*tert*-butoxycarbonyl)(4-fluorobenzyl)amino)methyl)-8-hydroxy-4,9,11*b*-trimethyltetradecahydro-6*a*,9-methanocyclohepta[*a*]naphthalene-4-carboxylate (**13**):

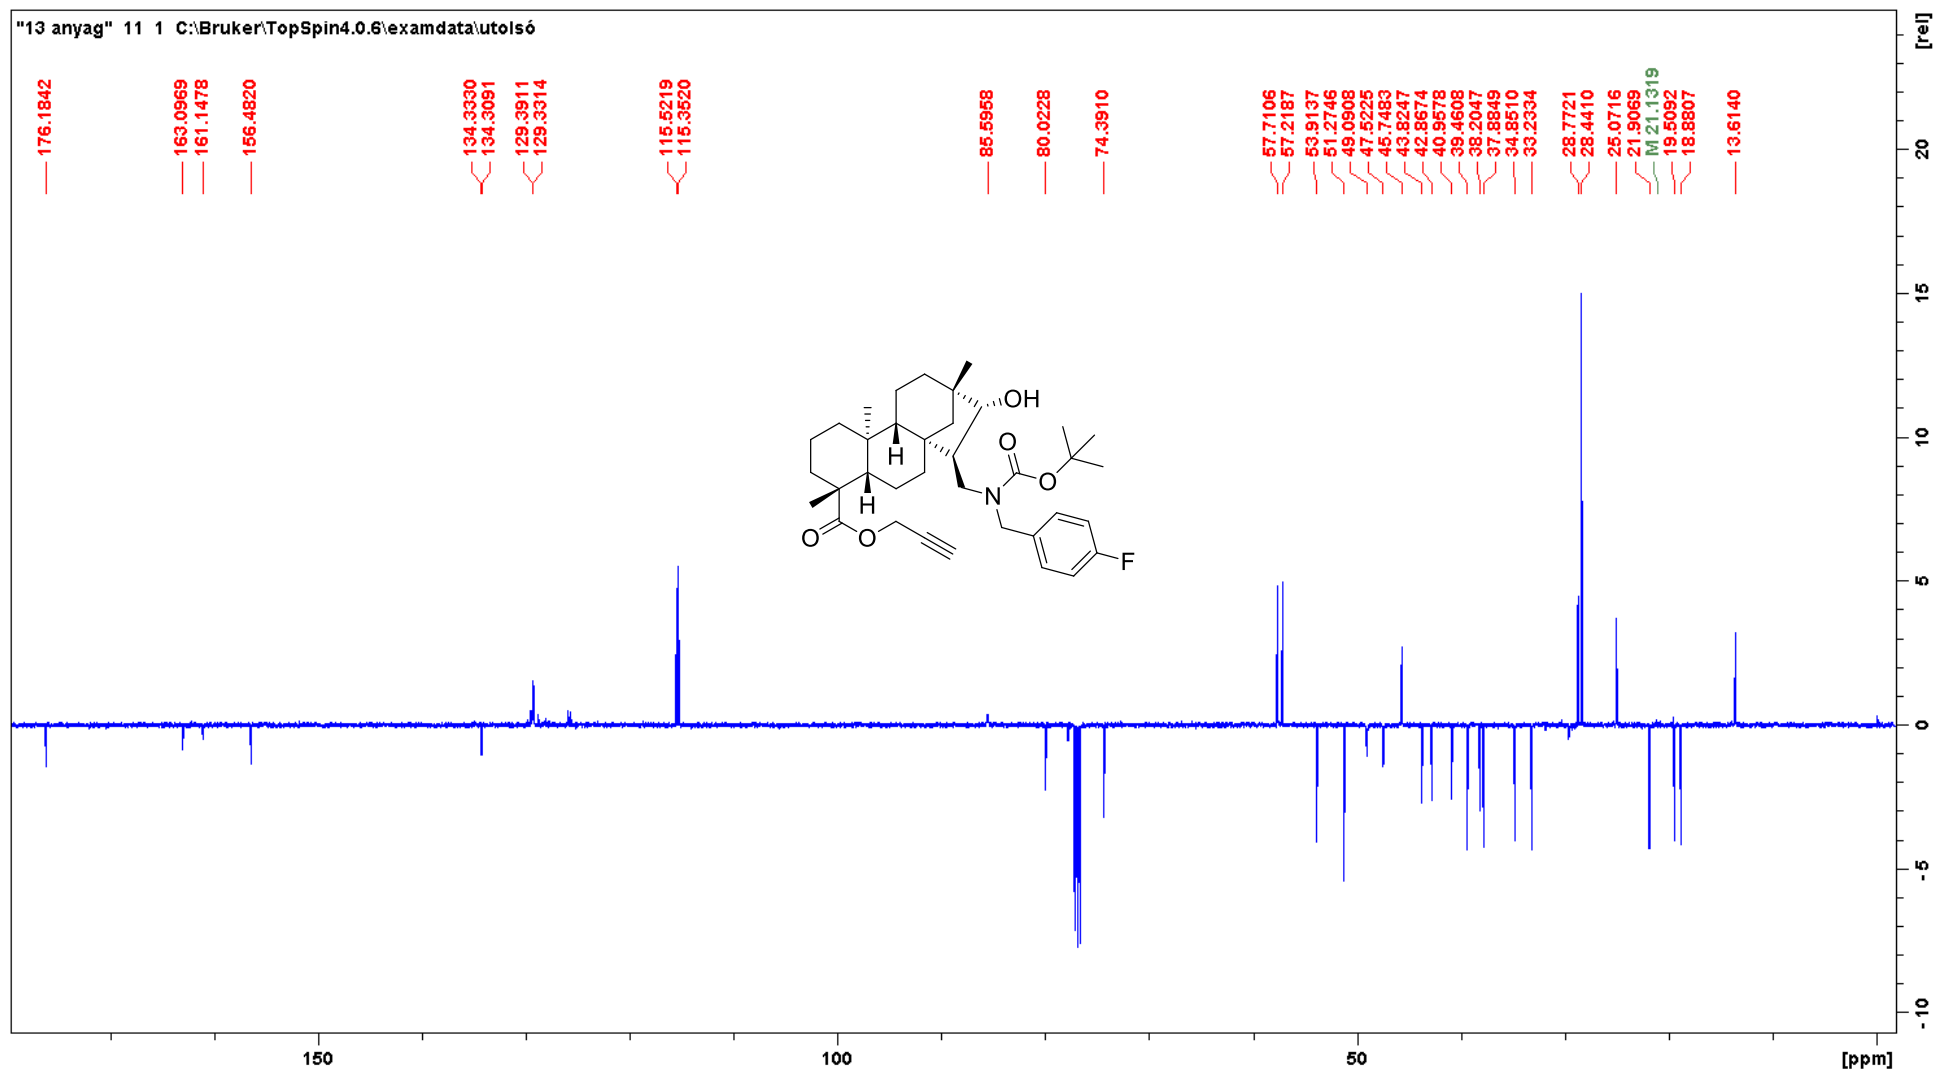

Figure S56

COSY of compound (4*R*,4*aS*,6*aS*,7*R*,8*R*,9*S*,11*bS*)-Prop-2-yn-1-yl 7-(((*tert*-butoxycarbonyl)(4-fluorobenzyl)amino)methyl)-8-hydroxy-4,9,11*b*-trimethyltetradecahydro-6*a*,9-methanocyclohepta[*a*]naphthalene-4-carboxylate (**13**):

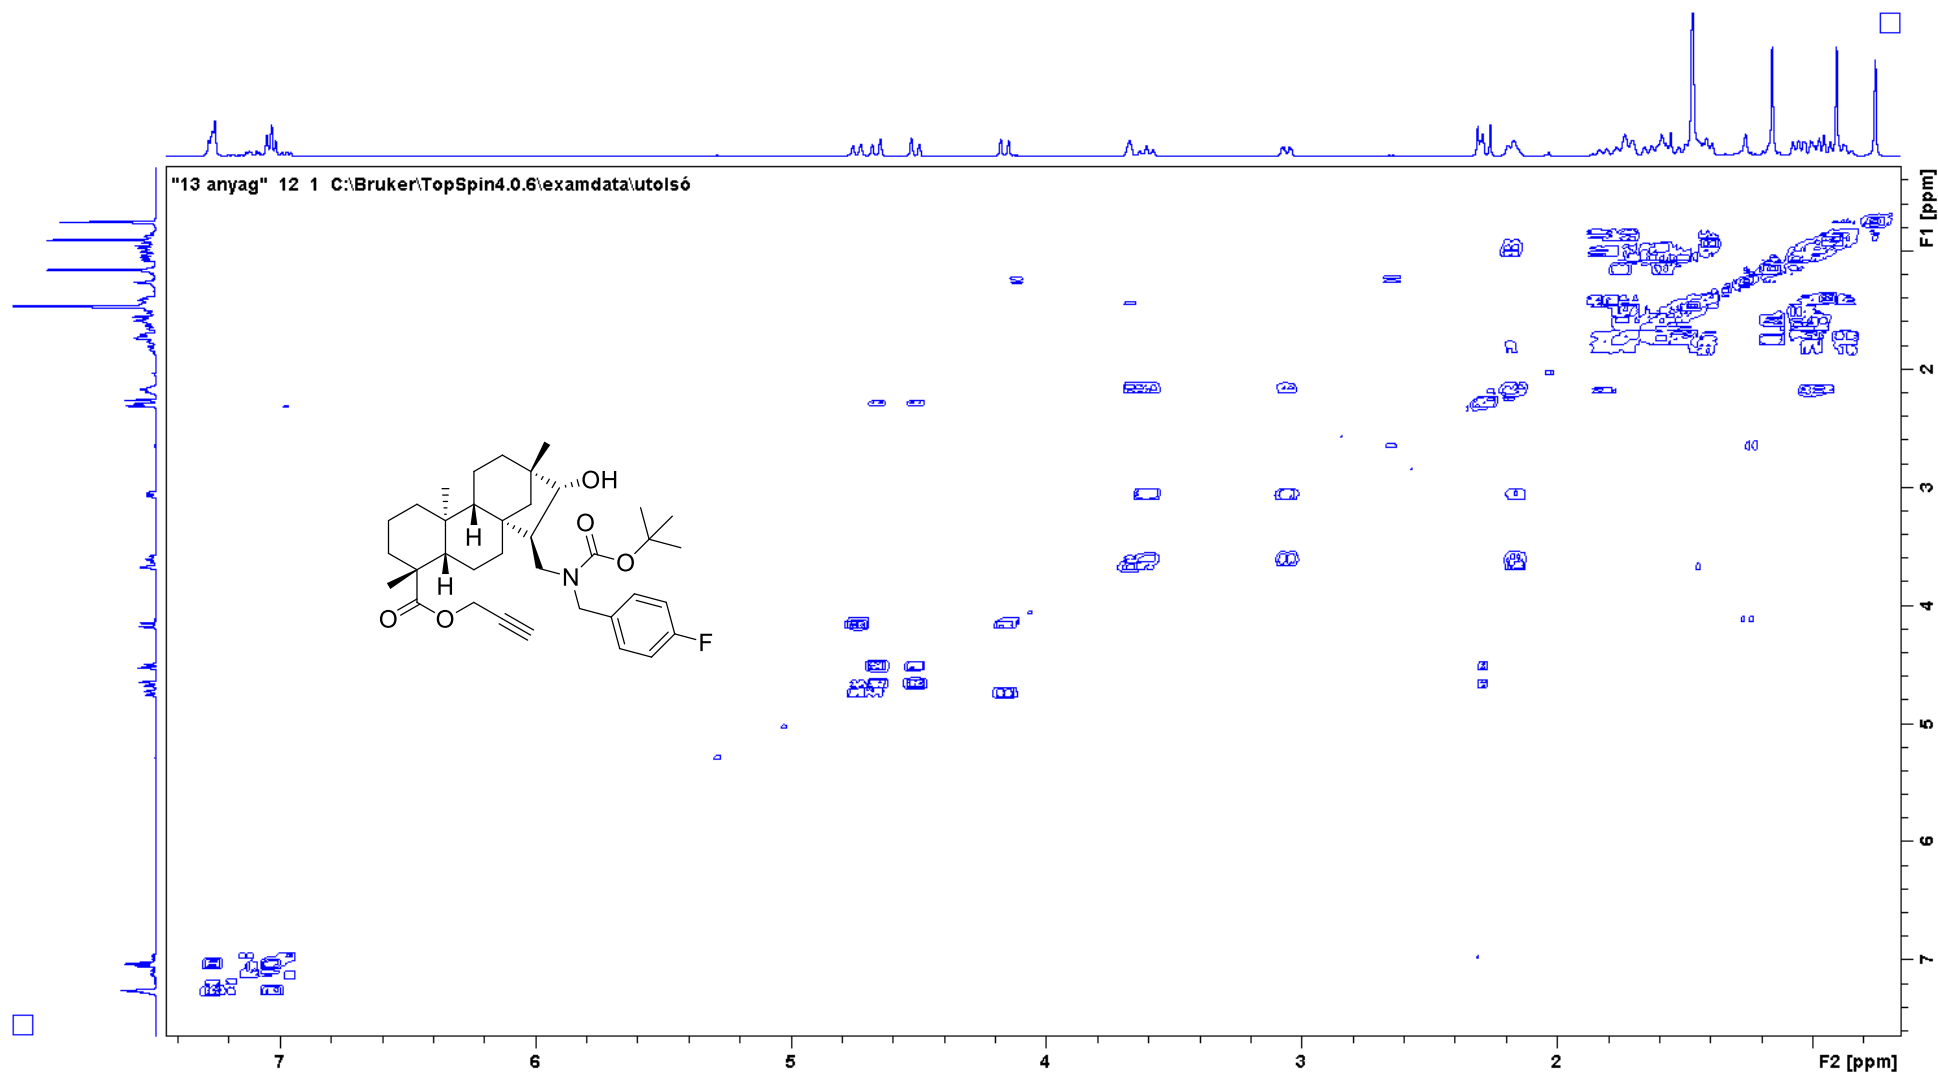

Figure S57

NOESY of compound (4*R*,4*aS*,6*aS*,7*R*,8*R*,9*S*,11*bS*)-Prop-2-yn-1-yl 7-(((*tert*-butoxycarbonyl)(4-fluorobenzyl)amino)methyl)-8-hydroxy-4,9,11*b*-trimethyltetradecahydro-6*a*,9-methanocyclohepta[*a*]naphthalene-4-carboxylate (**13**):

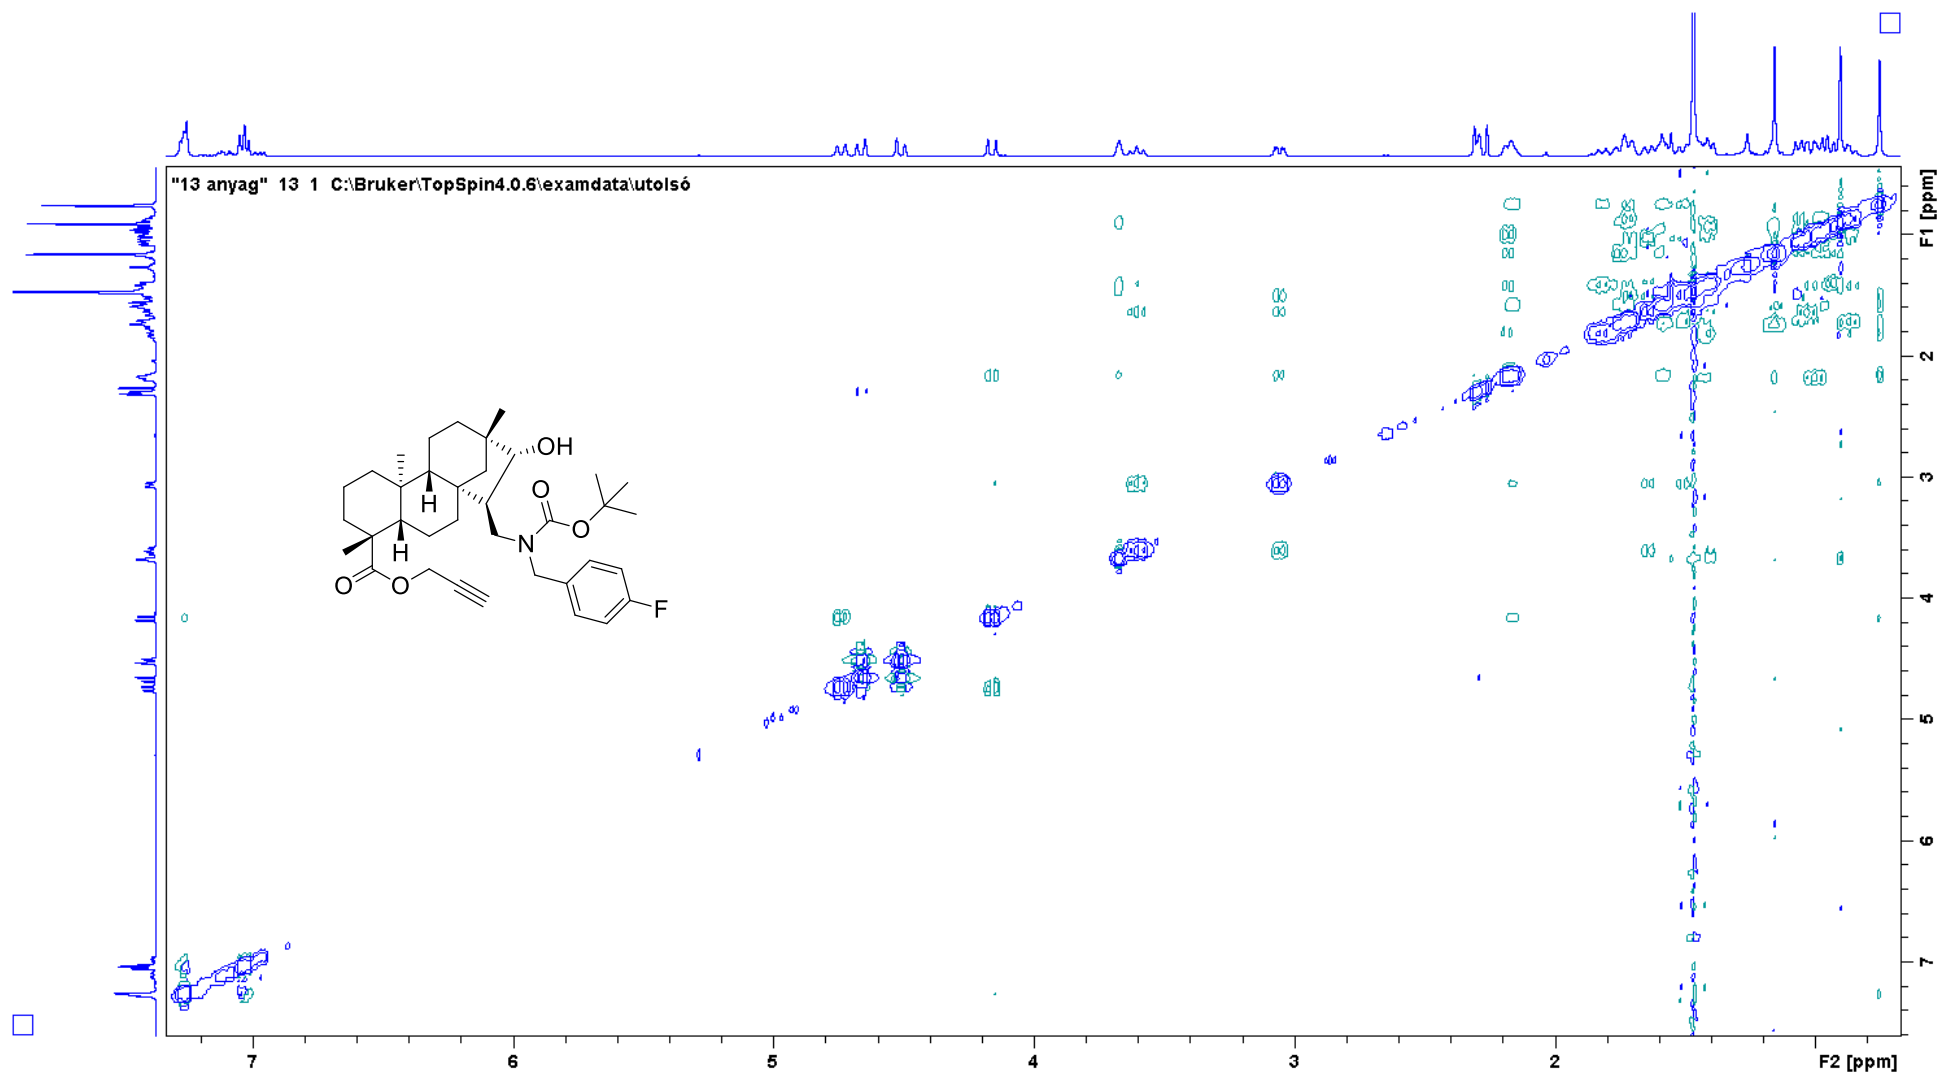

Figure S58

HSQC of compound (4*R*,4*aS*,6*aS*,7*R*,8*R*,9*S*,11*bS*)-Prop-2-yn-1-yl 7-(((*tert*-butoxycarbonyl)(4-fluorobenzyl)amino)methyl)-8-hydroxy-4,9,11*b*-trimethyltetradecahydro-6*a*,9-methanocyclohepta[*a*]naphthalene-4-carboxylate (**13**):

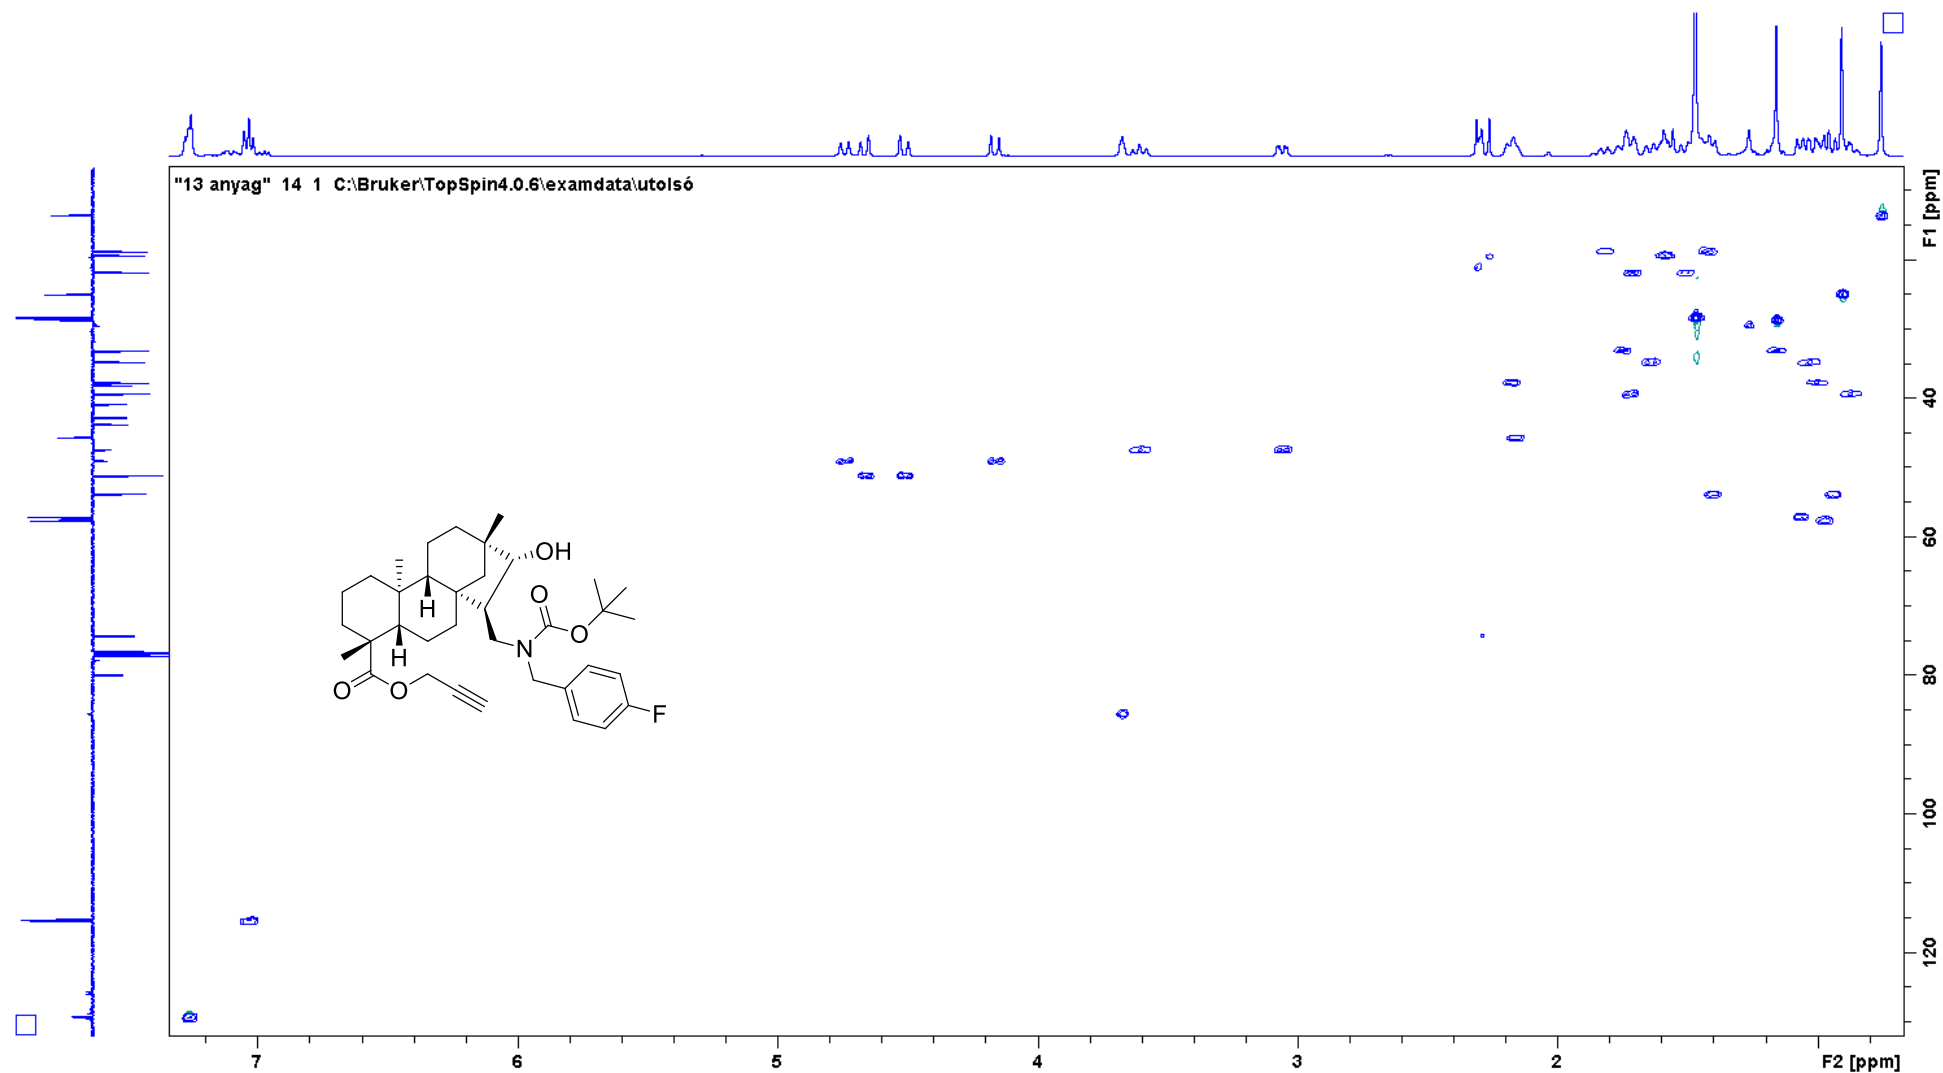

Figure S59

HMBC of compound (4*R*,4*aS*,6*aS*,7*R*,8*R*,9*S*,11*bS*)-Prop-2-yn-1-yl 7-(((*tert*-butoxycarbonyl)(4-fluorobenzyl)amino)methyl)-8-hydroxy-4,9,11*b*-trimethyltetradecahydro-6*a*,9-methanocyclohepta[*a*]naphthalene-4-carboxylate (**13**):

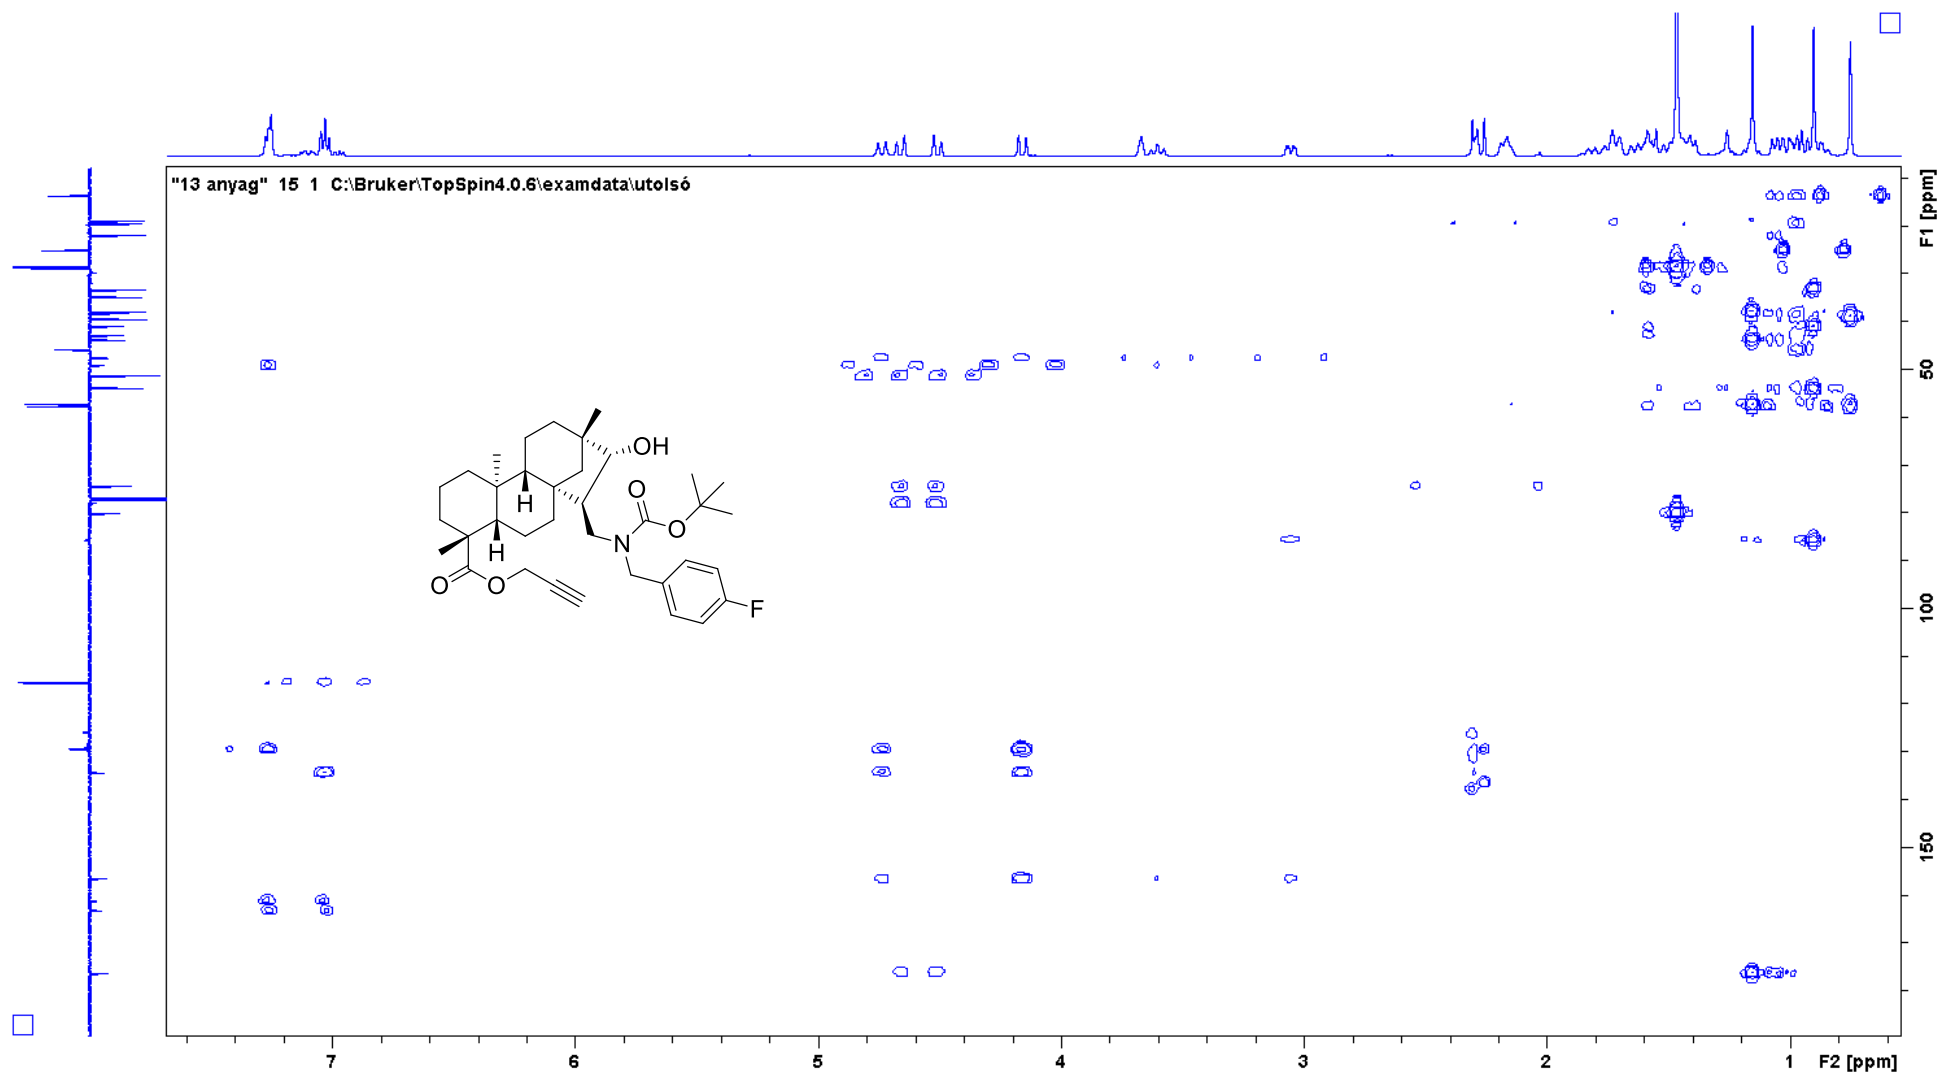

Figure S60

$^1\text{H}$ -NMR of compound (4*R*,4*aS*,6*aS*,7*R*,8*R*,9*S*,11*bS*)-Prop-2-yn-1-yl 7-(((4-fluorobenzyl)amino)methyl)-8-hydroxy-4,9,11*b*-trimethyltetradecahydro-6*a*,9-methanocyclohepta[*a*]naphthalene-4-carboxylate (**14**):

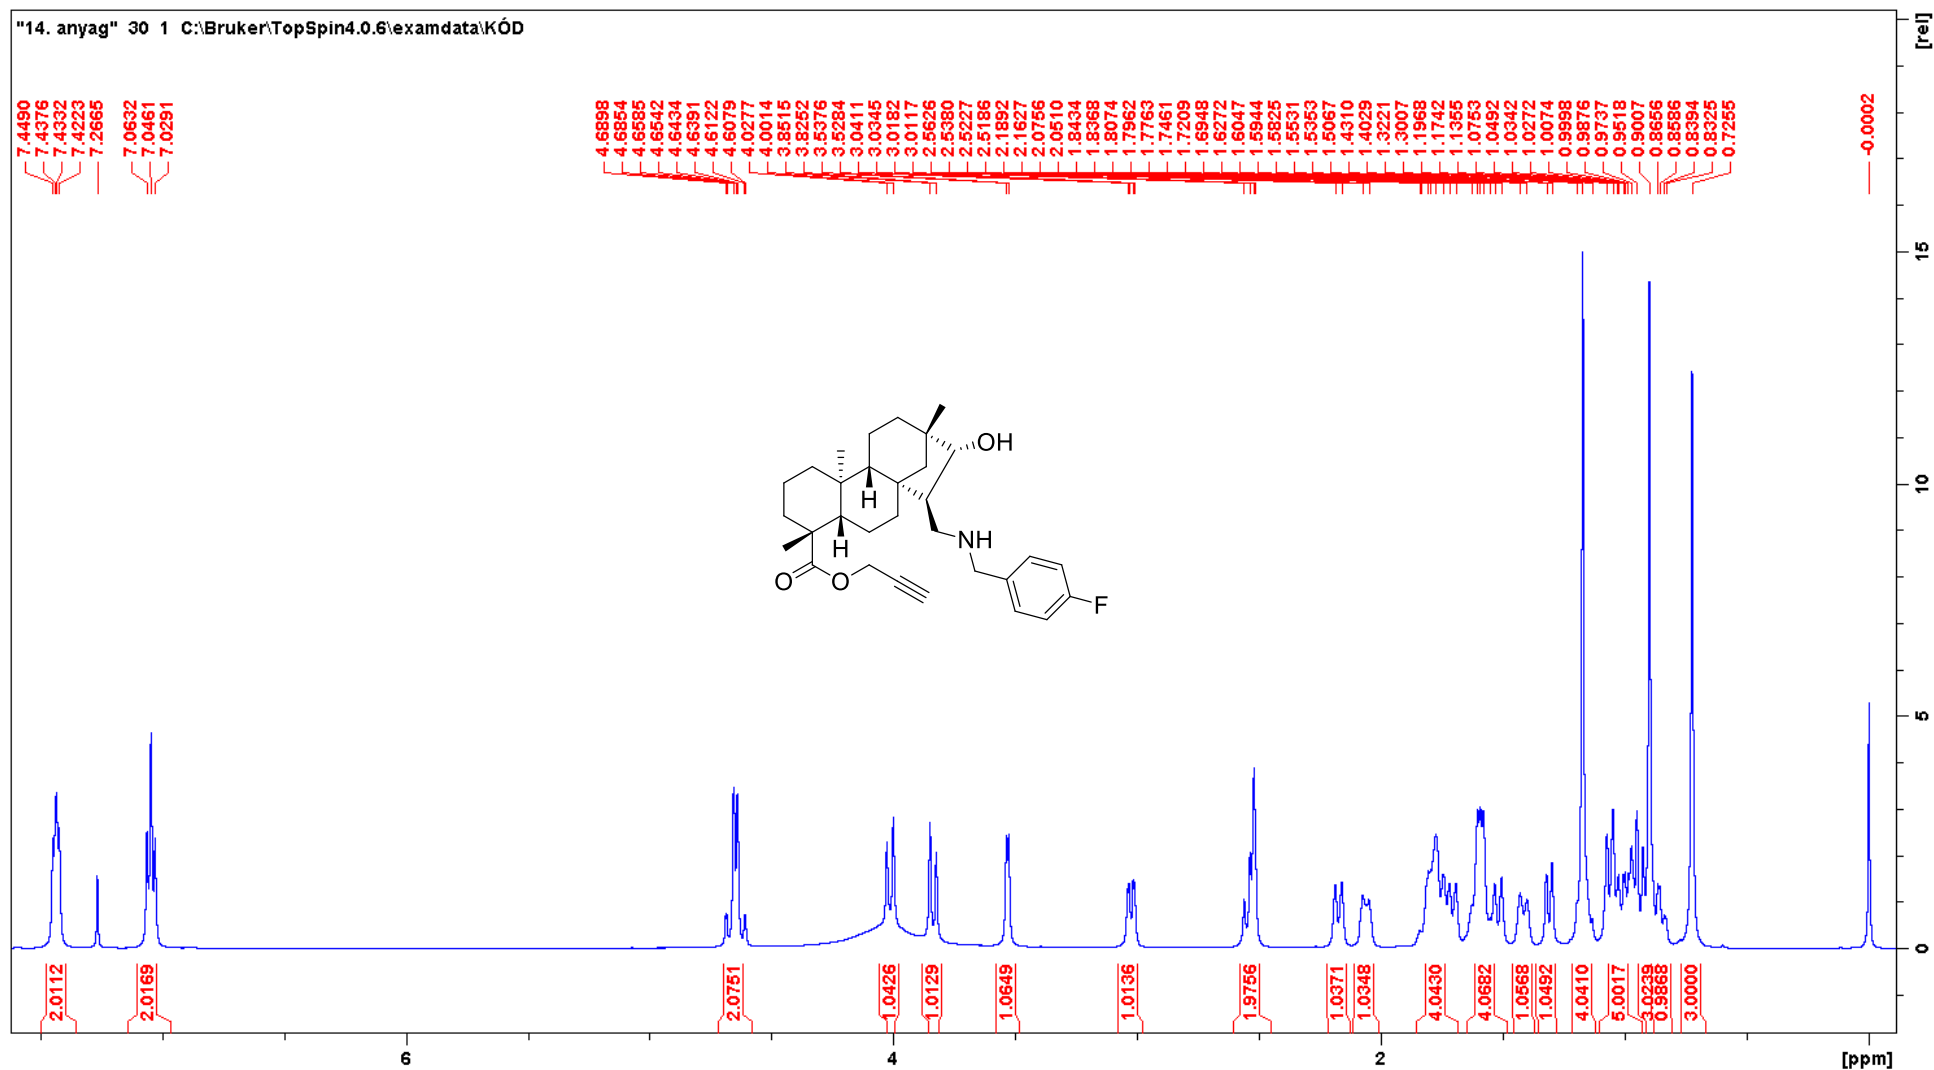

Figure S61

$^{13}\text{C}$ -NMR of compound (4*R*,4*aS*,6*aS*,7*R*,8*R*,9*S*,11*bS*)-Prop-2-yn-1-yl 7-(((4-fluorobenzyl)amino)methyl)-8-hydroxy-4,9,11*b*-trimethyltetradecahydro-6*a*,9-methanocyclohepta[*a*]naphthalene-4-carboxylate (**14**):

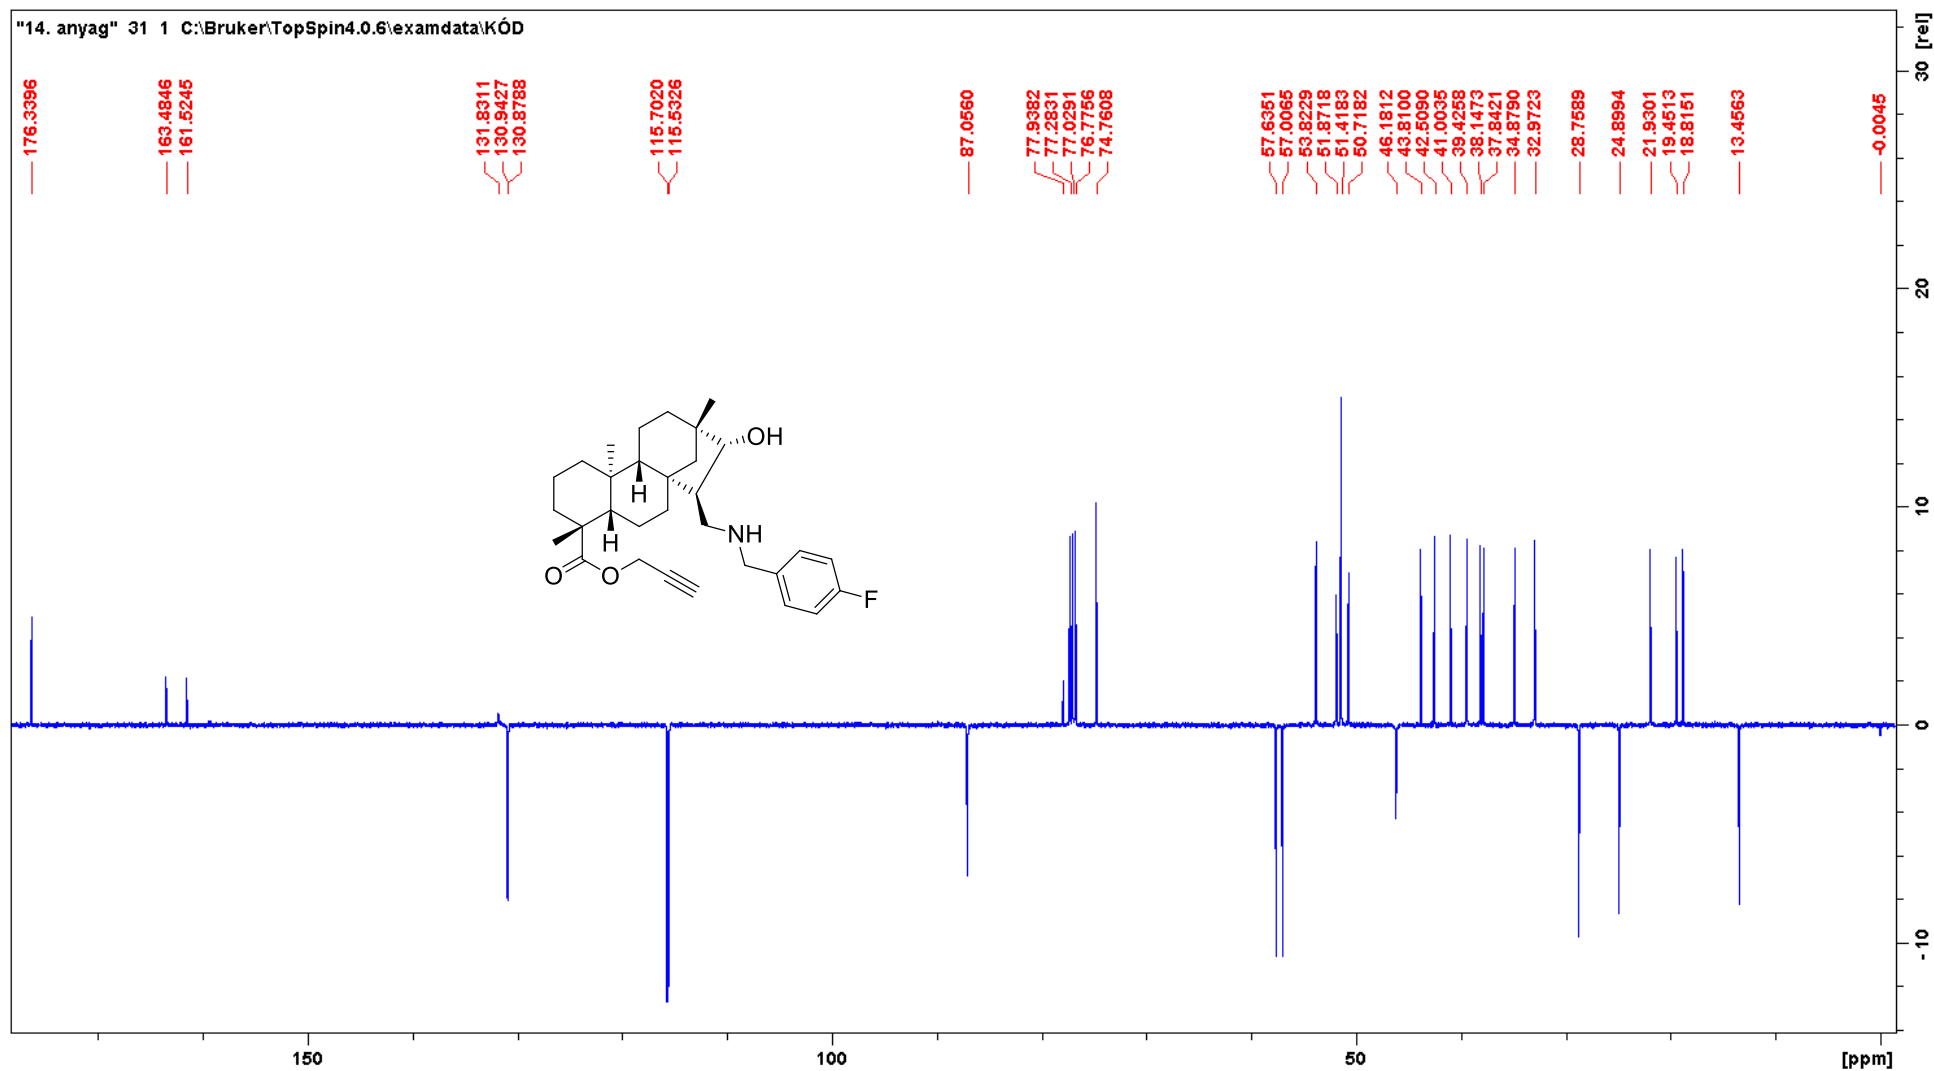



Figure S62

COSY of compound (4*R*,4*aS*,6*aS*,7*R*,8*R*,9*S*,11*bS*)-Prop-2-yn-1-yl 7-(((4-fluorobenzyl)amino)methyl)-8-hydroxy-4,9,11*b*-trimethyltetra decahydro-6*a*,9-methanocyclohepta[*a*]naphthalene-4-carboxylate (**14**):

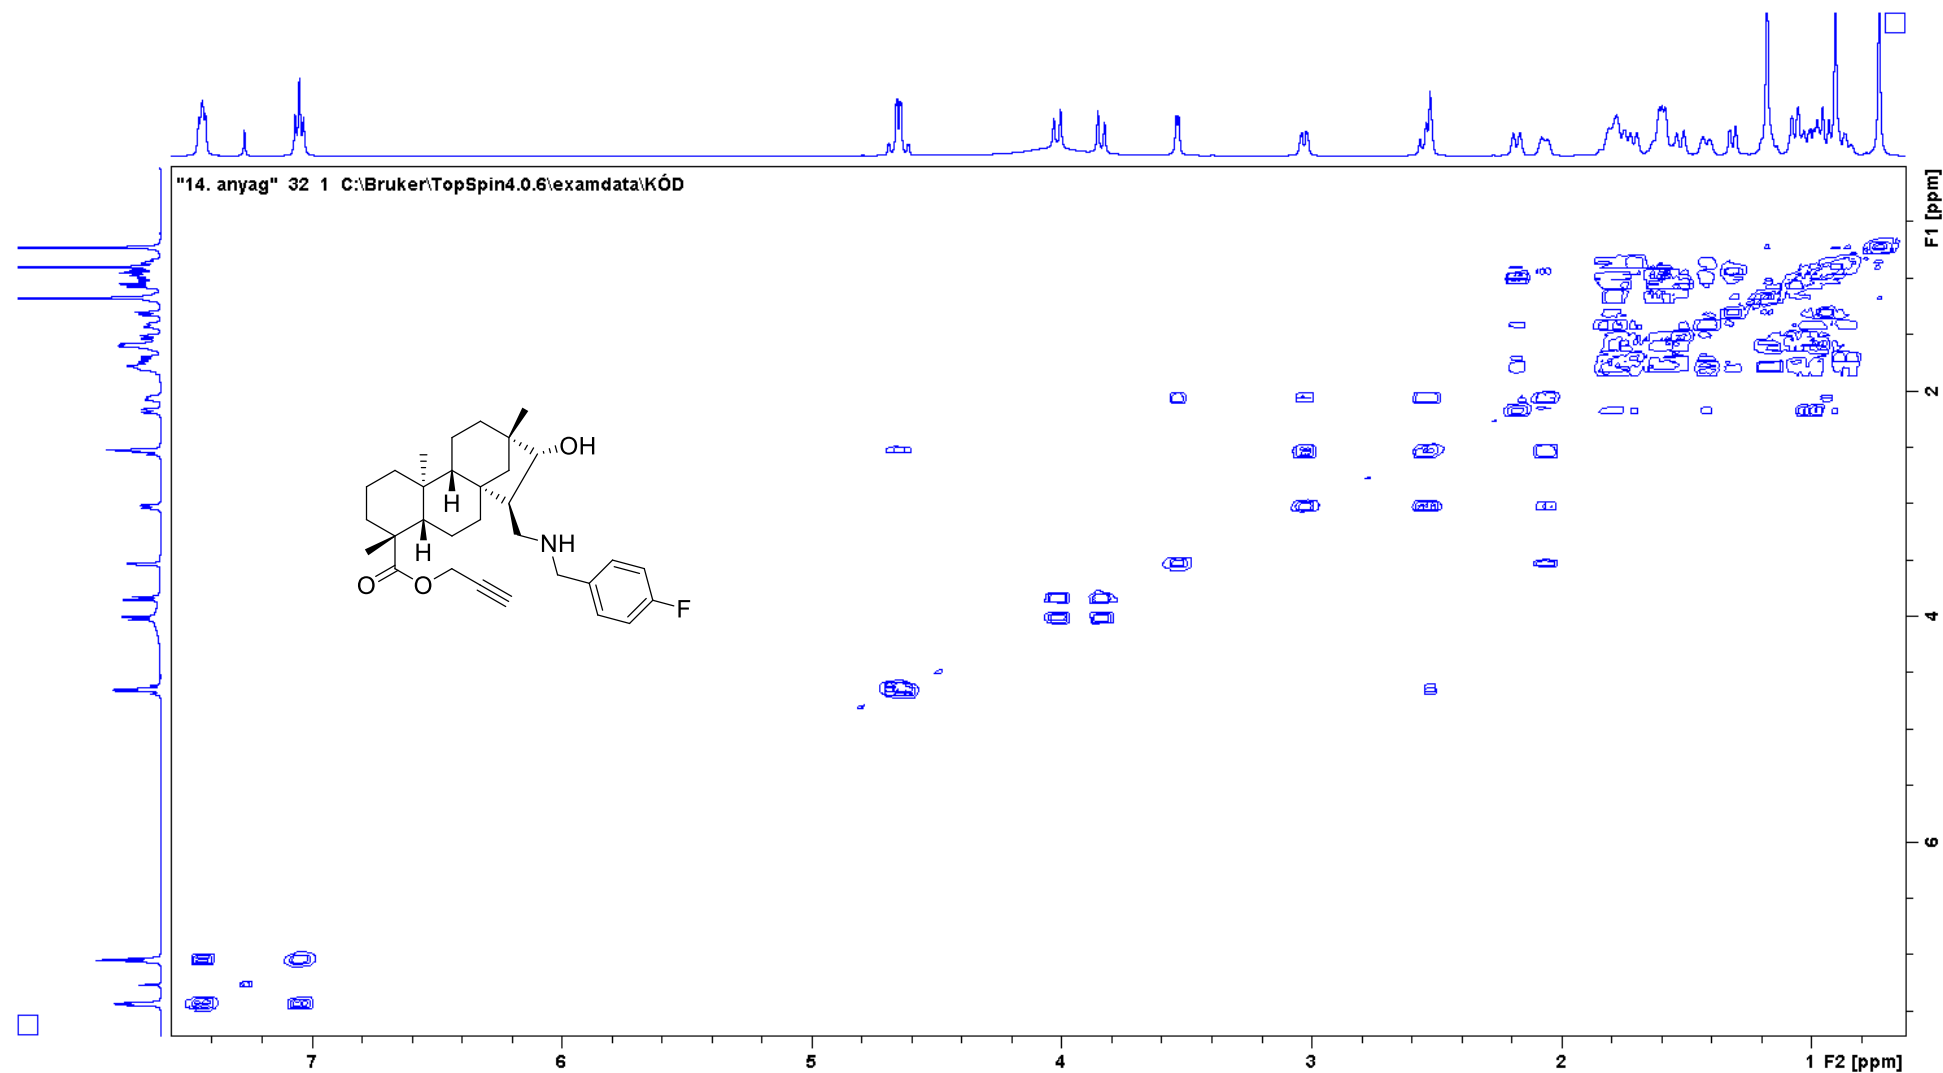

Figure S63

NOESY of compound (4*R*,4*aS*,6*aS*,7*R*,8*R*,9*S*,11*bS*)-Prop-2-yn-1-yl 7-(((4-fluorobenzyl)amino)methyl)-8-hydroxy-4,9,11*b*-trimethyltetradecahydro-6*a*,9-methanocyclohepta[*a*]naphthalene-4-carboxylate (**14**):

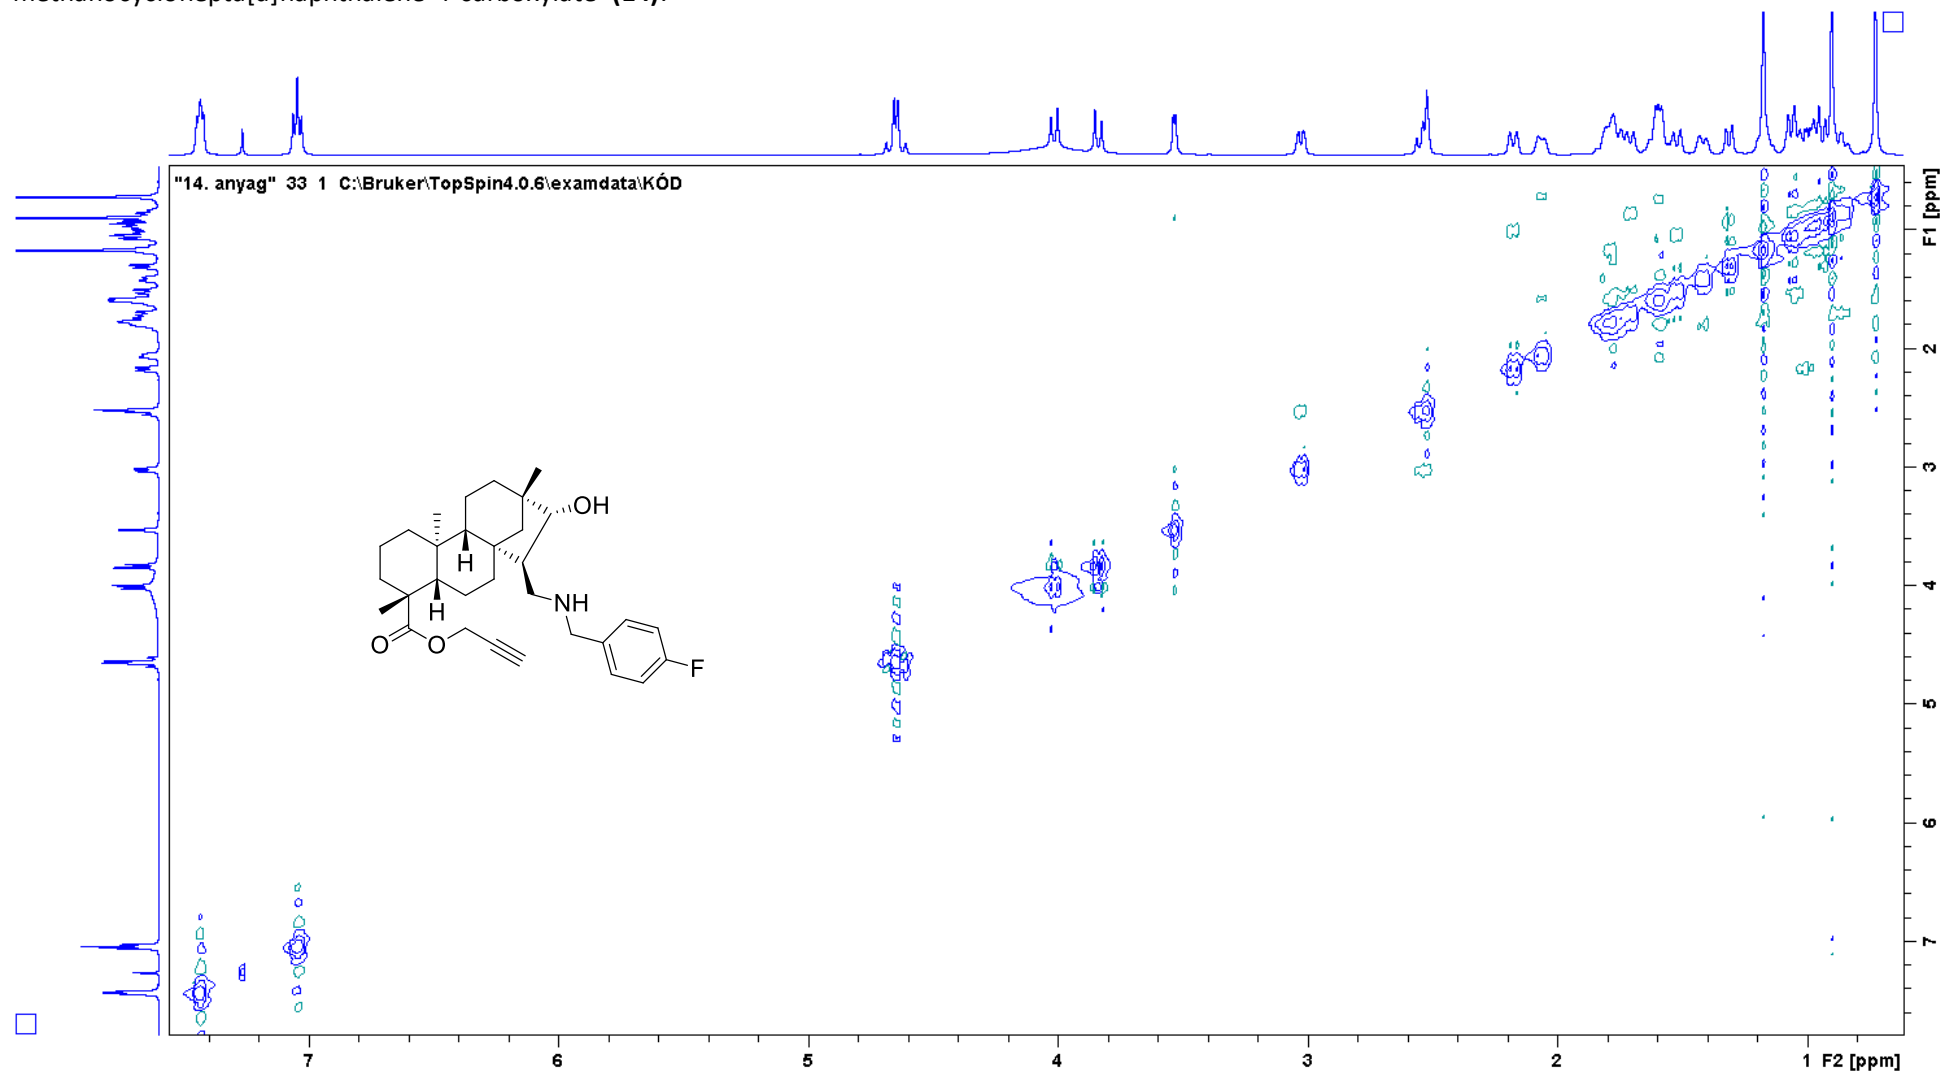

Figure S64

HSQC of compound (4*R*,4*aS*,6*aS*,7*R*,8*R*,9*S*,11*bS*)-Prop-2-yn-1-yl 7-(((4-fluorobenzyl)amino)methyl)-8-hydroxy-4,9,11*b*-trimethyltetradecahydro-6*a*,9-methanocyclohepta[*a*]naphthalene-4-carboxylate (**14**):

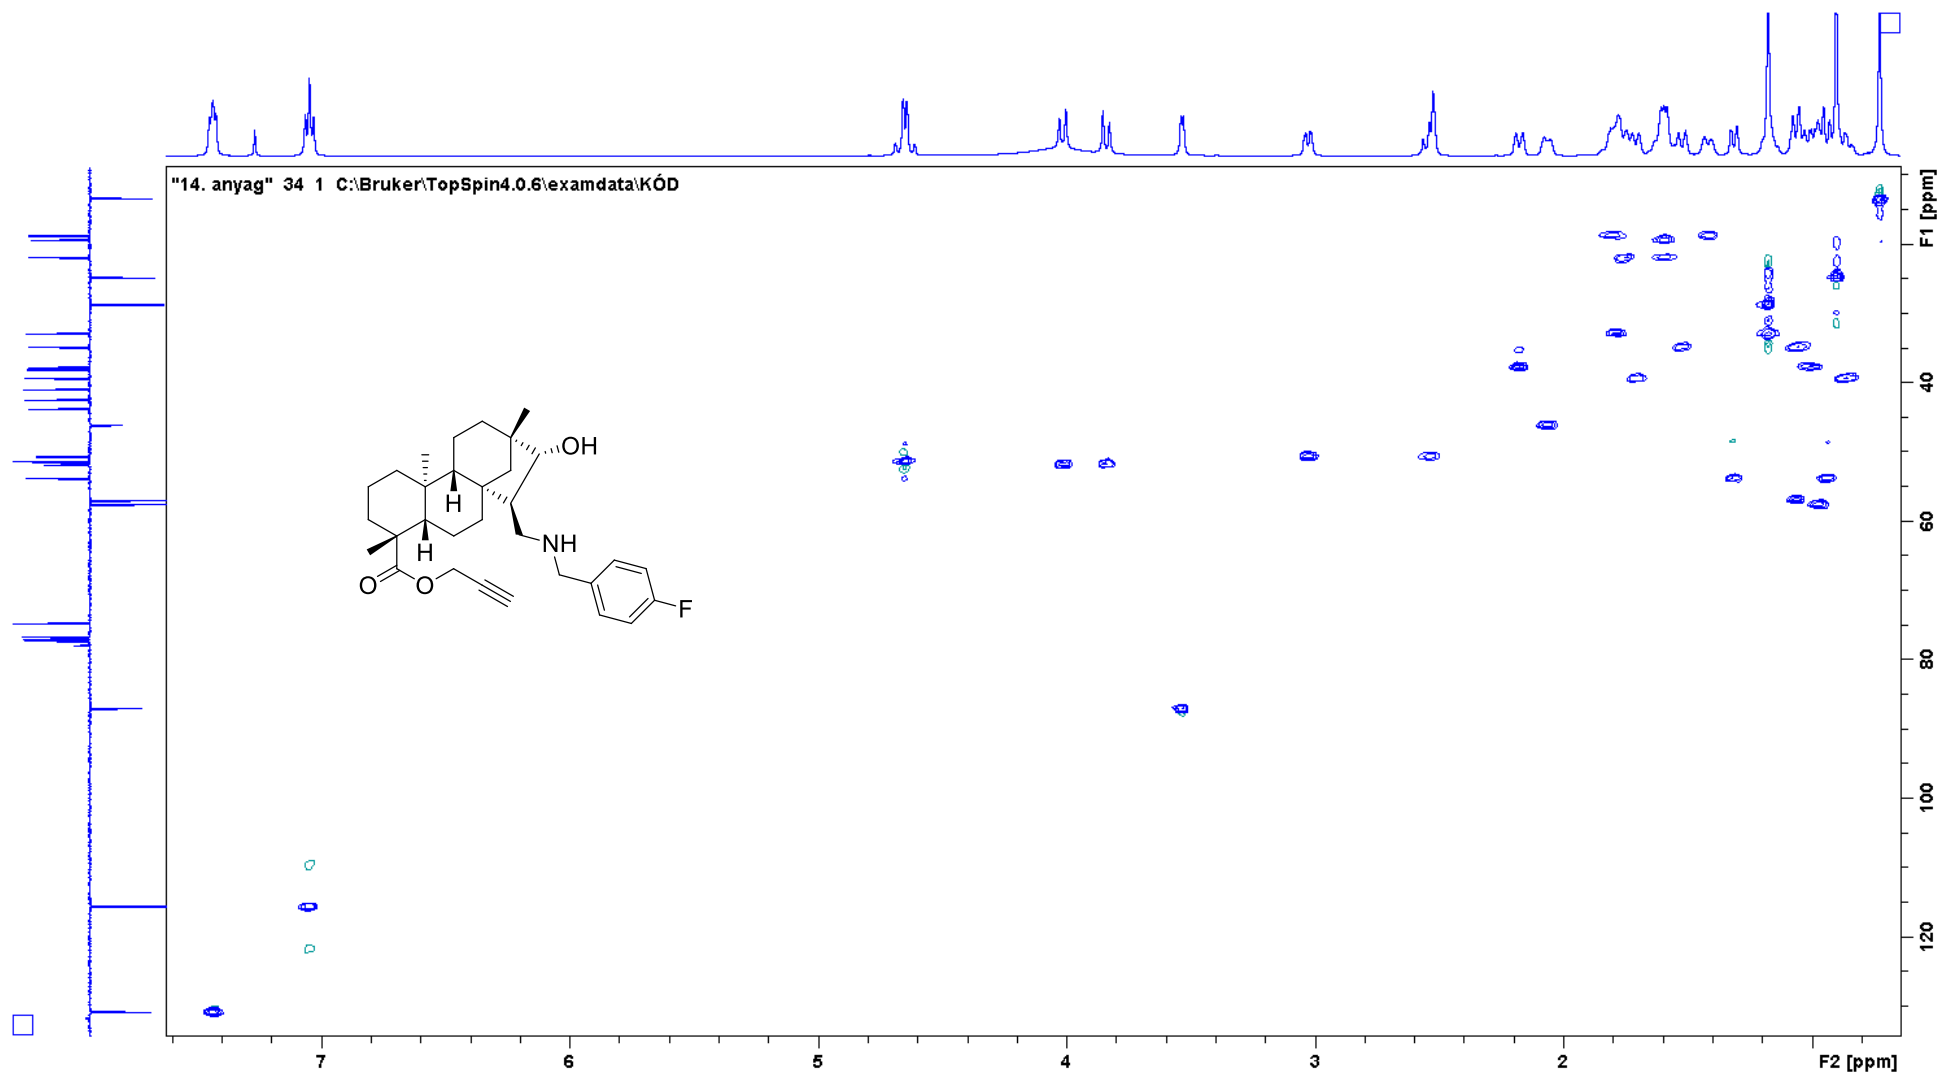

Figure S65

HMBC of compound (4*R*,4*a**S*,6*a**S*,7*R*,8*R*,9*S*,11*b**S*)-Prop-2-yn-1-yl 7-(((4-fluorobenzyl)amino)methyl)-8-hydroxy-4,9,11*b*-trimethyltetradecahydro-6*a*,9-methanocyclohepta[*a*]naphthalene-4-carboxylate (**14**):

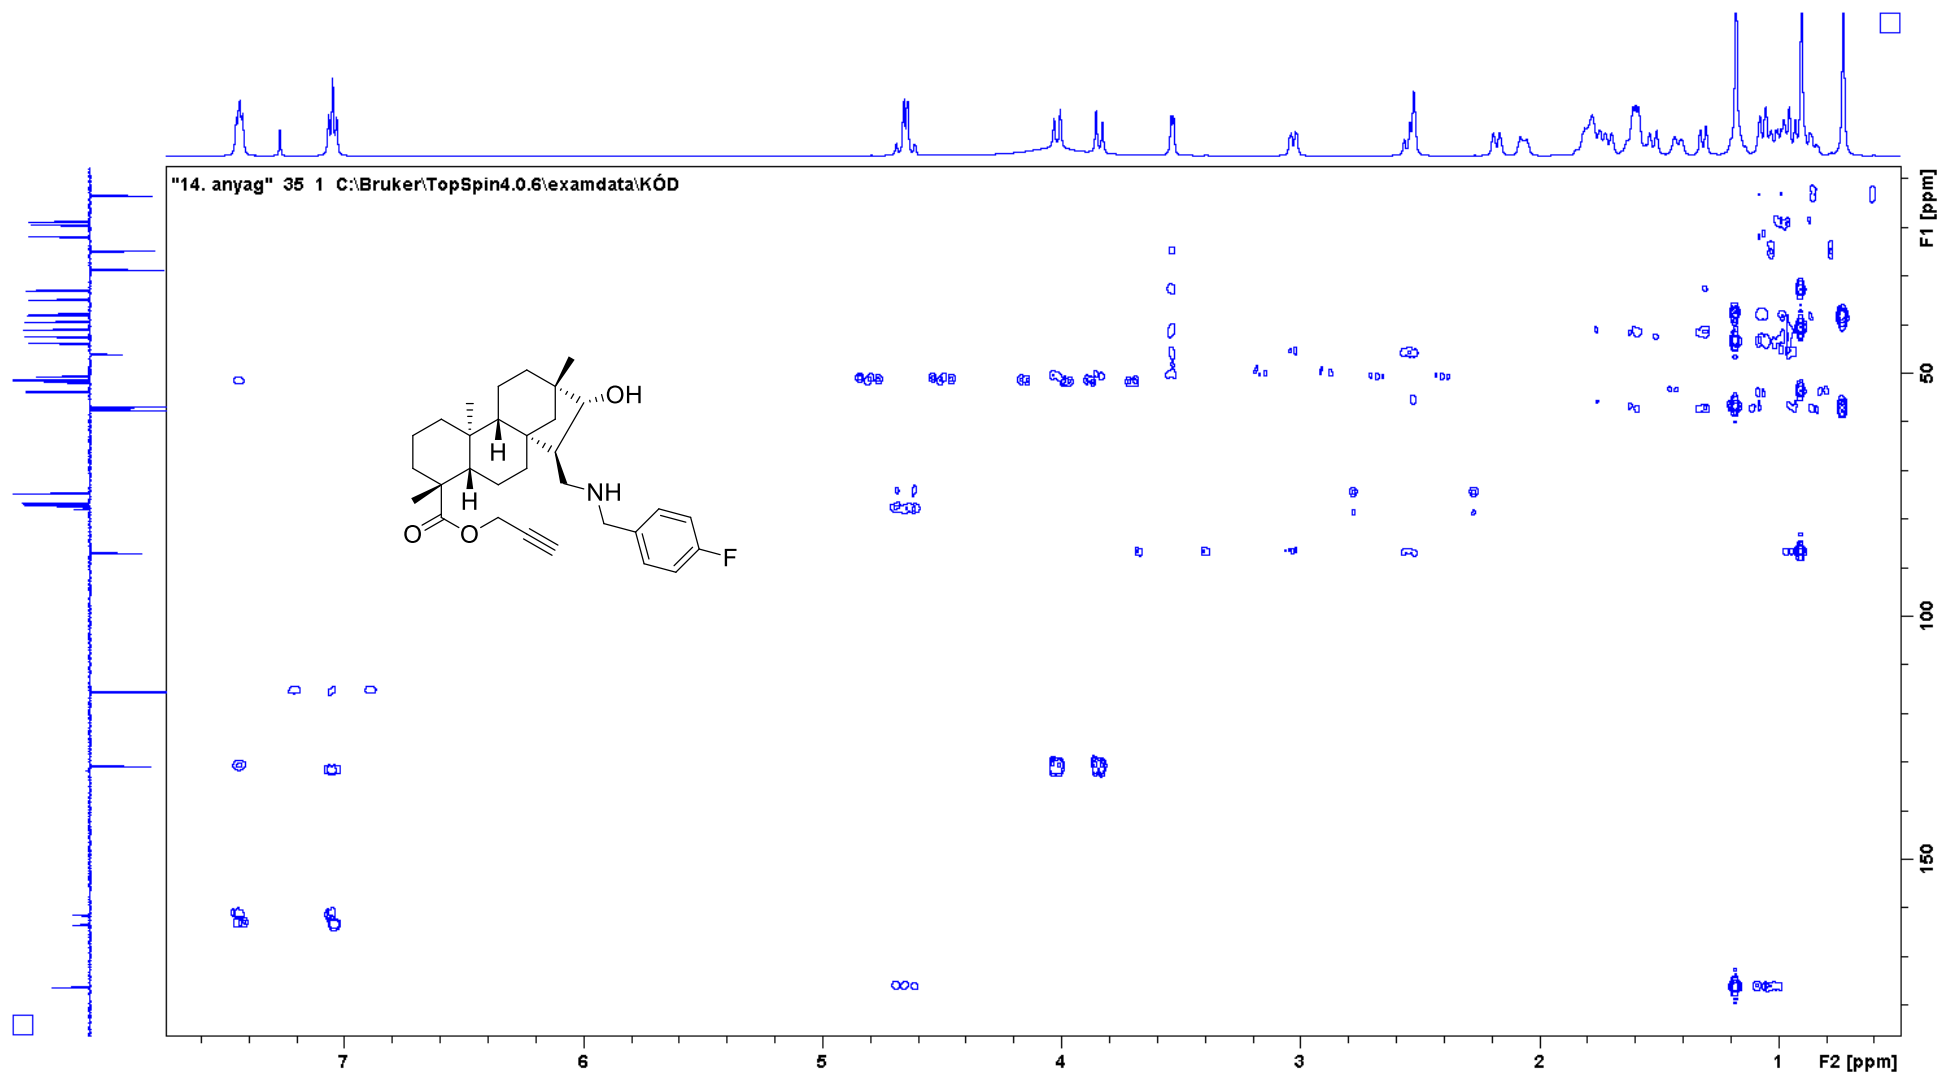

Figure S66

$^{19}\text{F}$ -NMR of compound (4*R*,4*aS*,6*aS*,7*R*,8*R*,9*S*,11*bS*)-Prop-2-yn-1-yl 7-(((4-fluorobenzyl)amino)methyl)-8-hydroxy-4,9,11*b*-trimethyltetradecahydro-6*a*,9-methanocyclohepta[*a*]naphthalene-4-carboxylate (**14**):

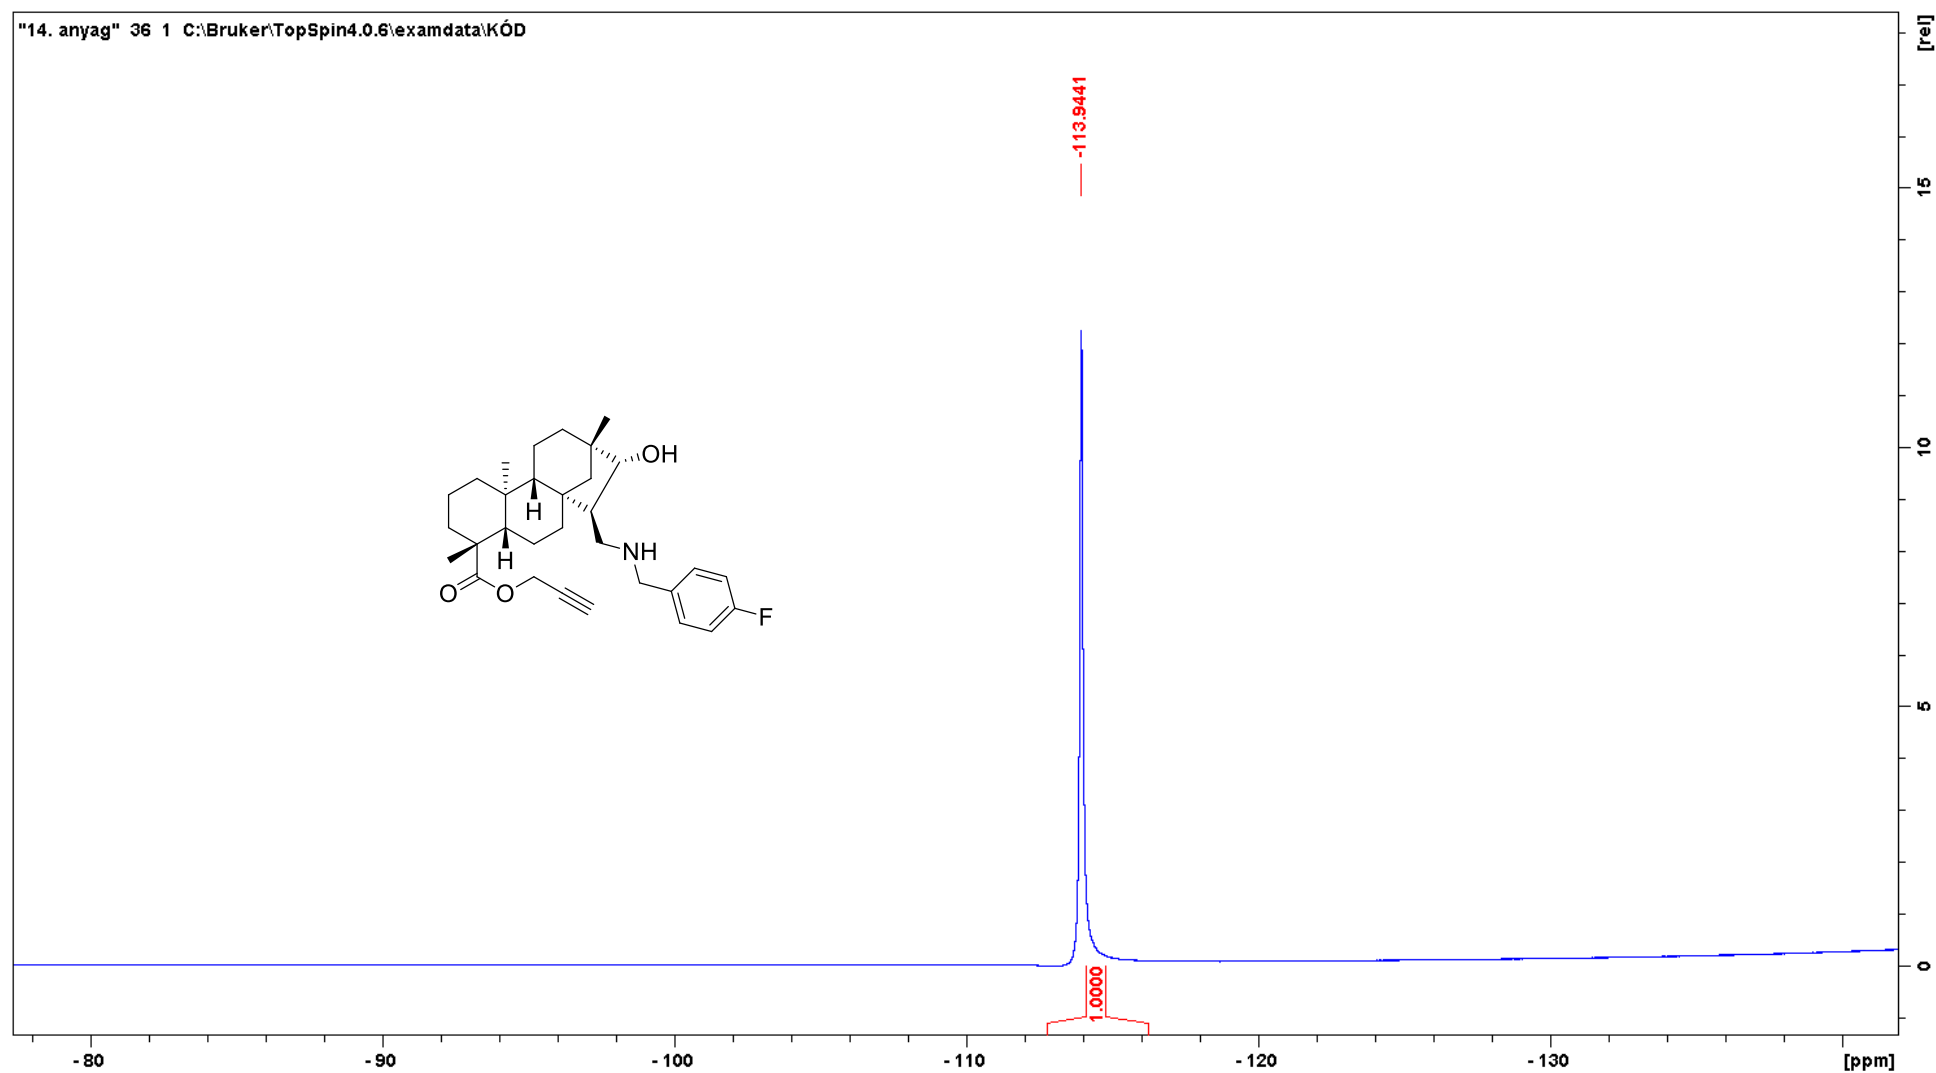

Figure S67

$^1\text{H}$ -NMR of compound (4*R*,4*aS*,6*aS*,7*R*,8*R*,9*S*,11*bS*)-Benzyl 7-((((*R*)-1-(4-fluorophenyl)ethyl)amino)methyl)-8-hydroxy-4,9,11*b*-trimethyltetradecahydro-6*a*,9-methanocyclohepta[*a*]naphthalene-4-carboxylate (**15**):

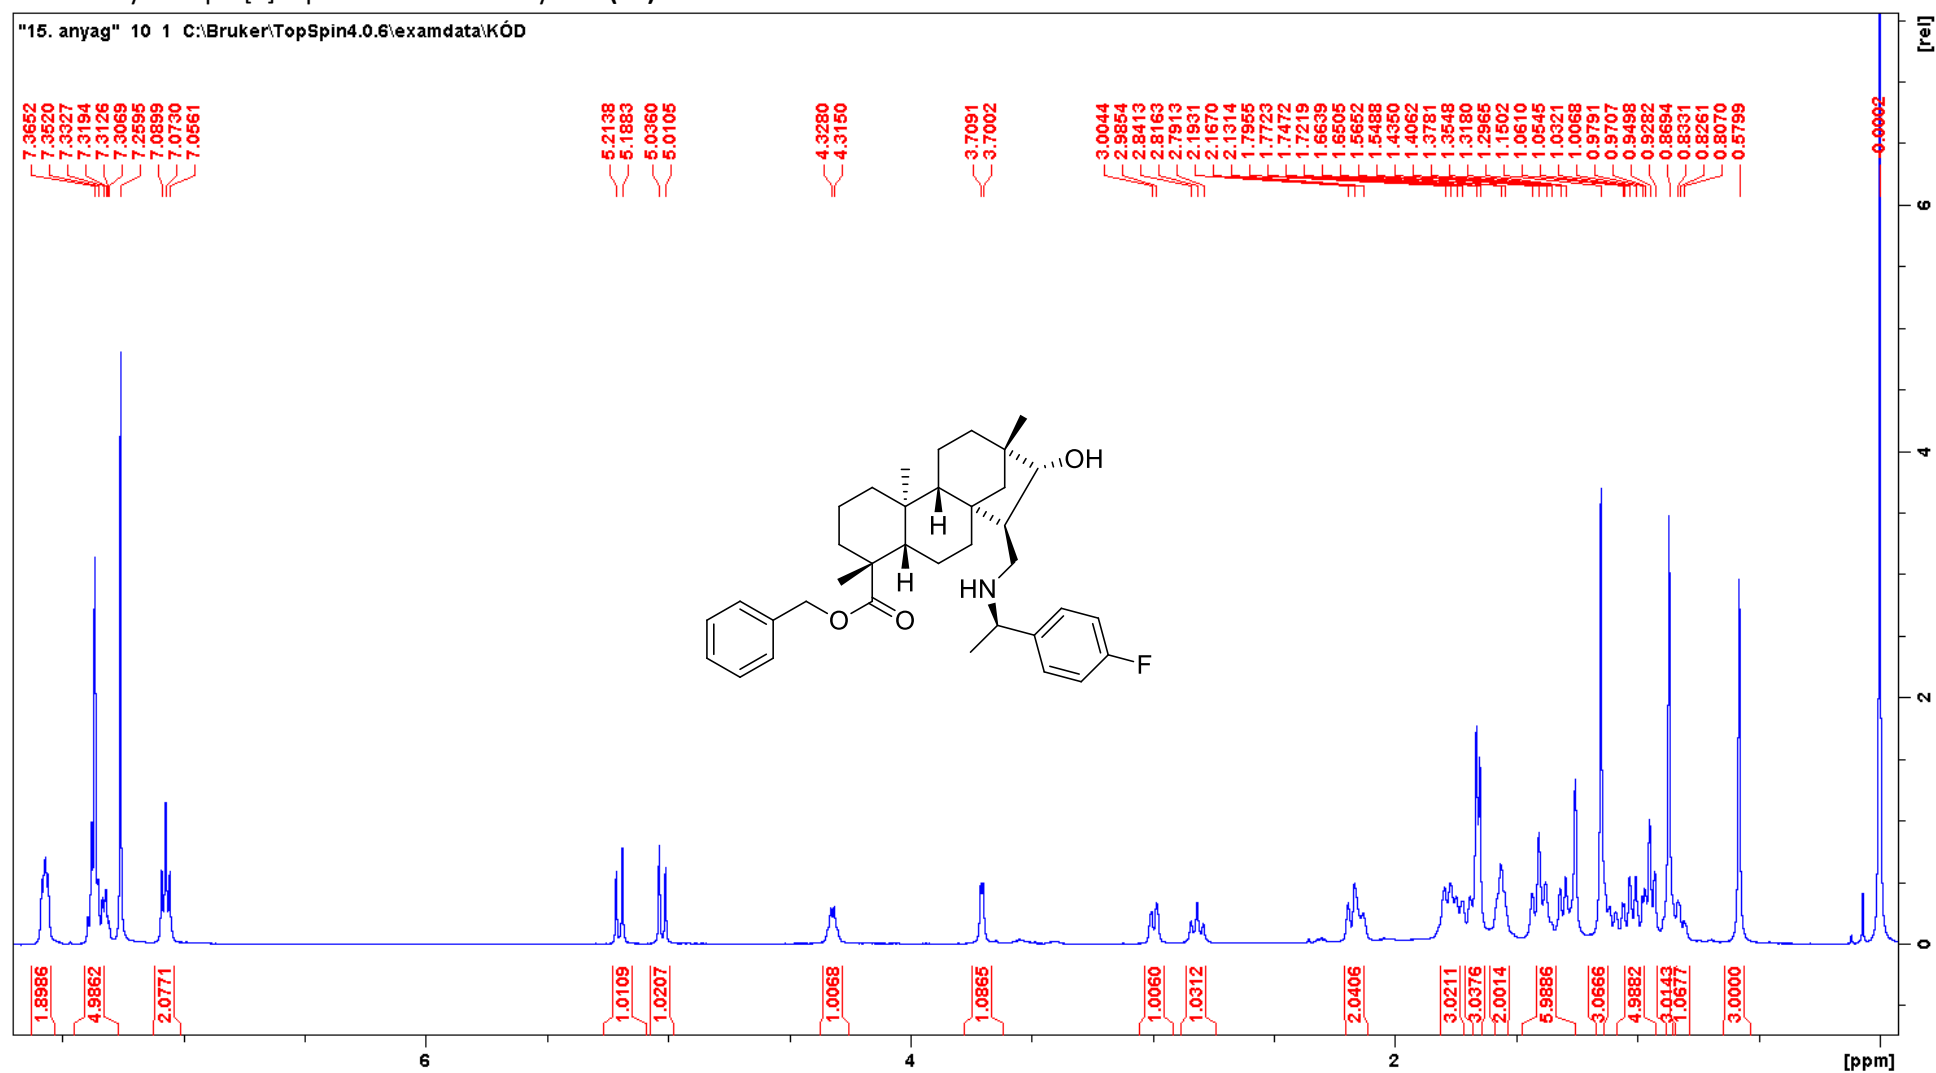

Figure S68

$^{13}\text{C}$ -NMR of compound (4*R*,4*aS*,6*aS*,7*R*,8*R*,9*S*,11*bS*)-Benzyl 7-((((*R*)-1-(4-fluorophenyl)ethyl)amino)methyl)-8-hydroxy-4,9,11*b*-trimethyltetra decahydro-6*a*,9-methanocyclohepta[*a*]naphthalene-4-carboxylate (**15**):

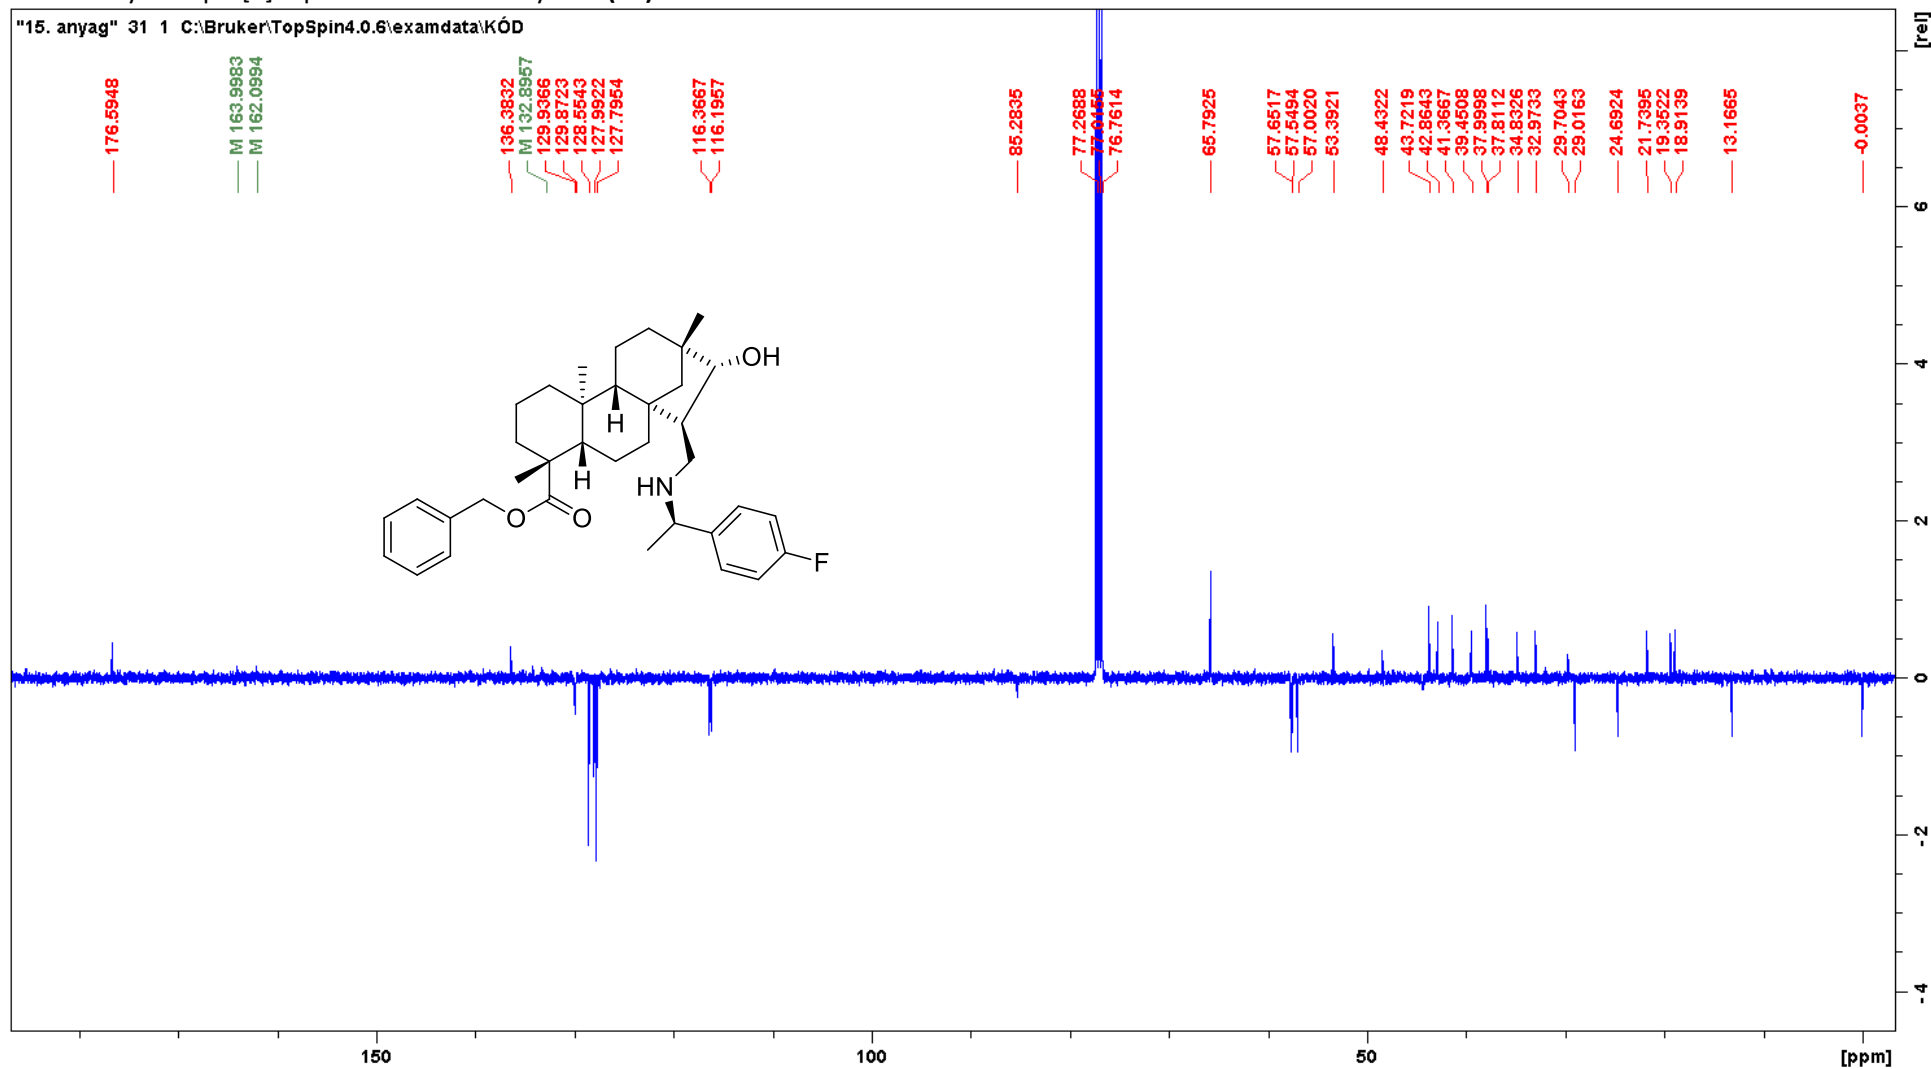

Figure S69

COSY of compound (4*R*,4*aS*,6*aS*,7*R*,8*R*,9*S*,11*bS*)-Benzyl 7-((((*R*)-1-(4-fluorophenyl)ethyl)amino)methyl)-8-hydroxy-4,9,11*b*-trimethyltetradecahydro-6*a*,9-methanocyclohepta[*a*]naphthalene-4-carboxylate (**15**):

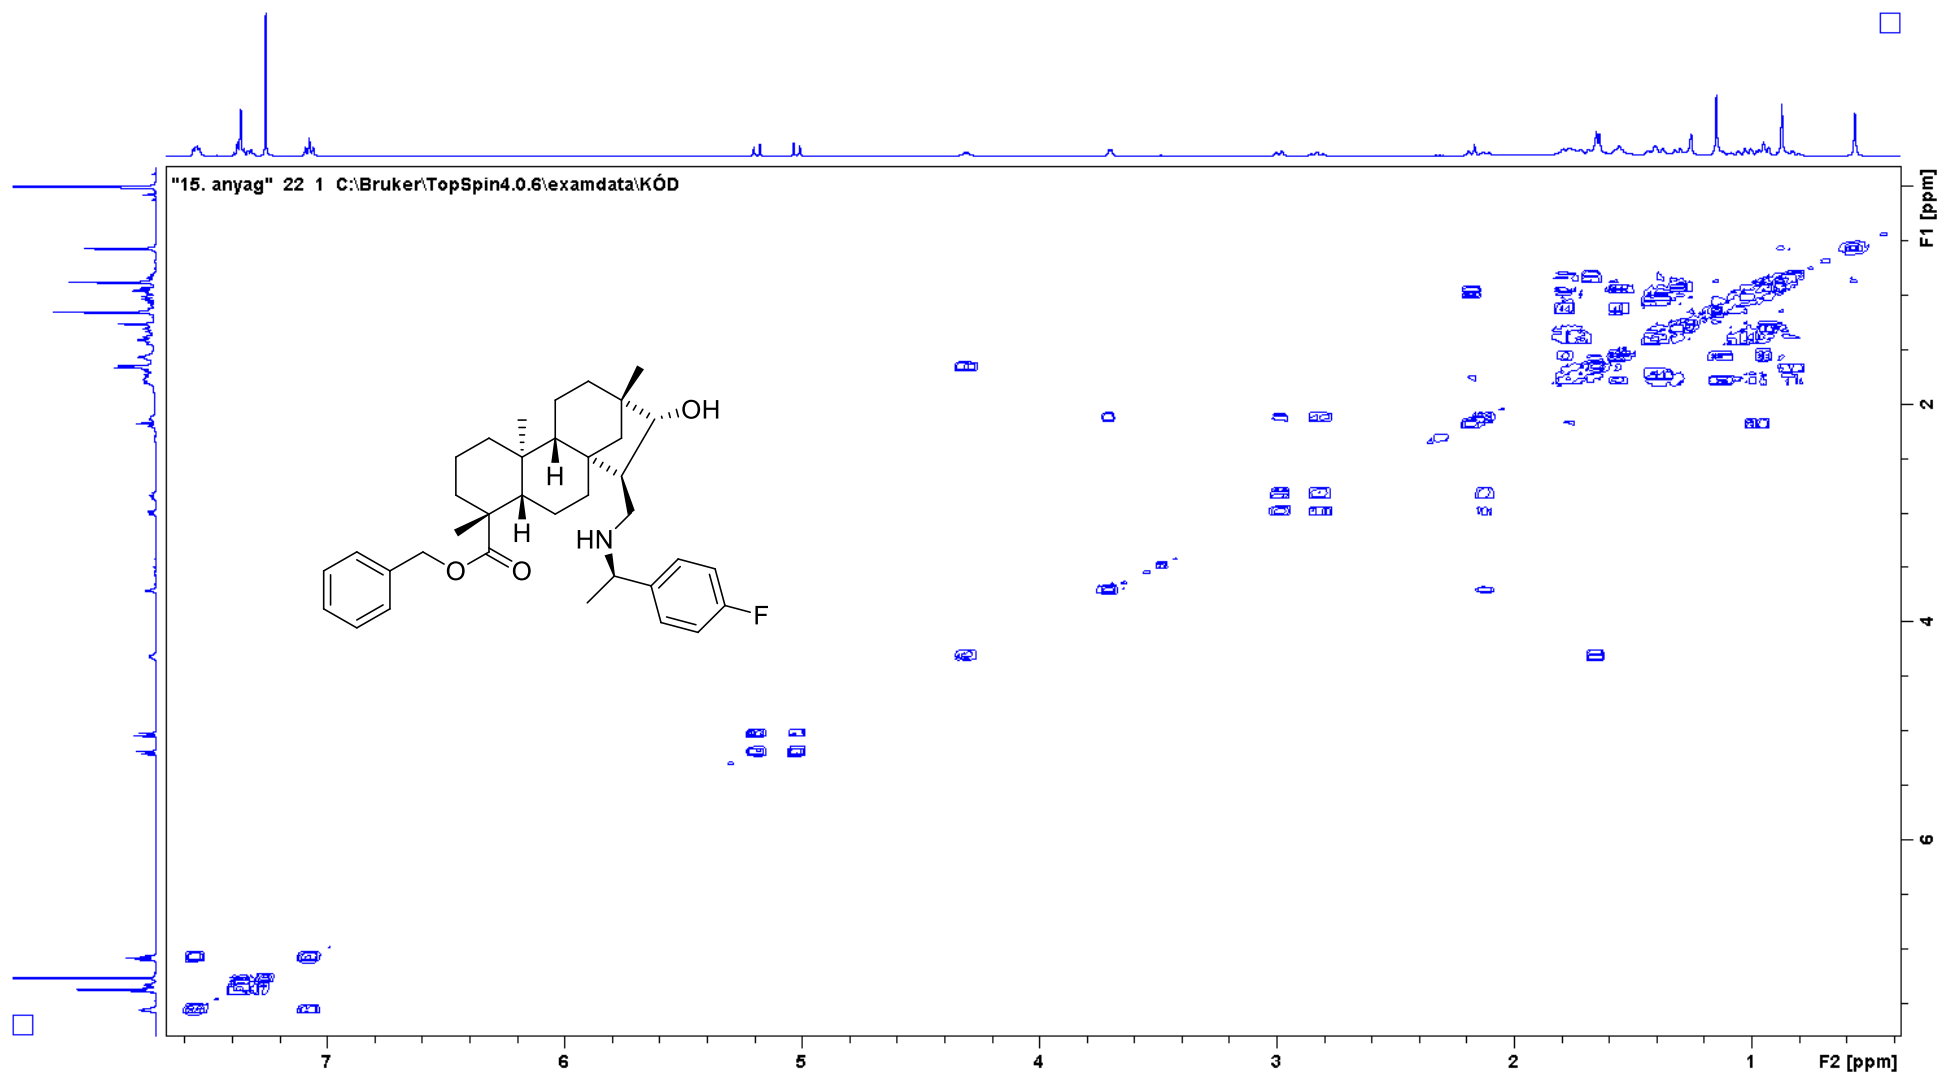



Figure S70

NOESY of compound (4*R*,4*aS*,6*aS*,7*R*,8*R*,9*S*,11*bS*)-Benzyl 7-((((*R*)-1-(4-fluorophenyl)ethyl)amino)methyl)-8-hydroxy-4,9,11*b*-trimethyltetradecahydro-6*a*,9-methanocyclohepta[*a*]naphthalene-4-carboxylate (**15**):

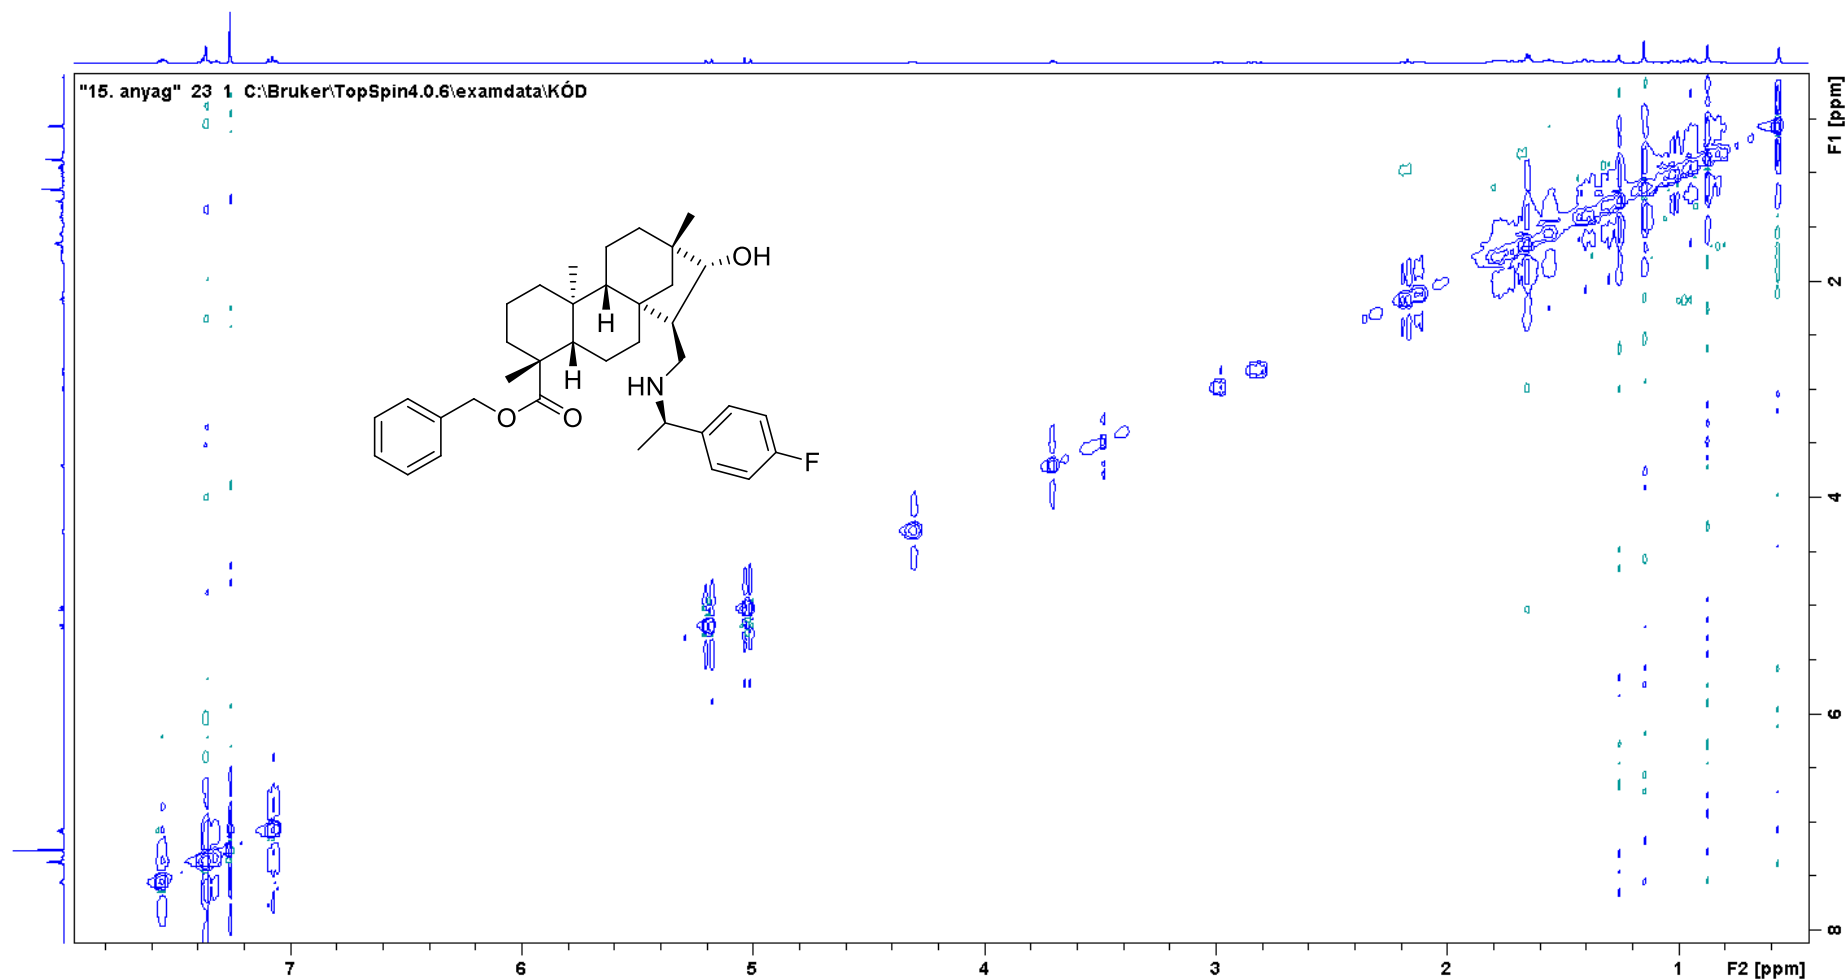

Figure S71

HSQC of compound (4*R*,4*aS*,6*aS*,7*R*,8*R*,9*S*,11*bS*)-Benzyl 7-((((*R*)-1-(4-fluorophenyl)ethyl)amino)methyl)-8-hydroxy-4,9,11*b*-trimethyltetradecahydro-6*a*,9-methanocyclohepta[*a*]naphthalene-4-carboxylate (**15**):

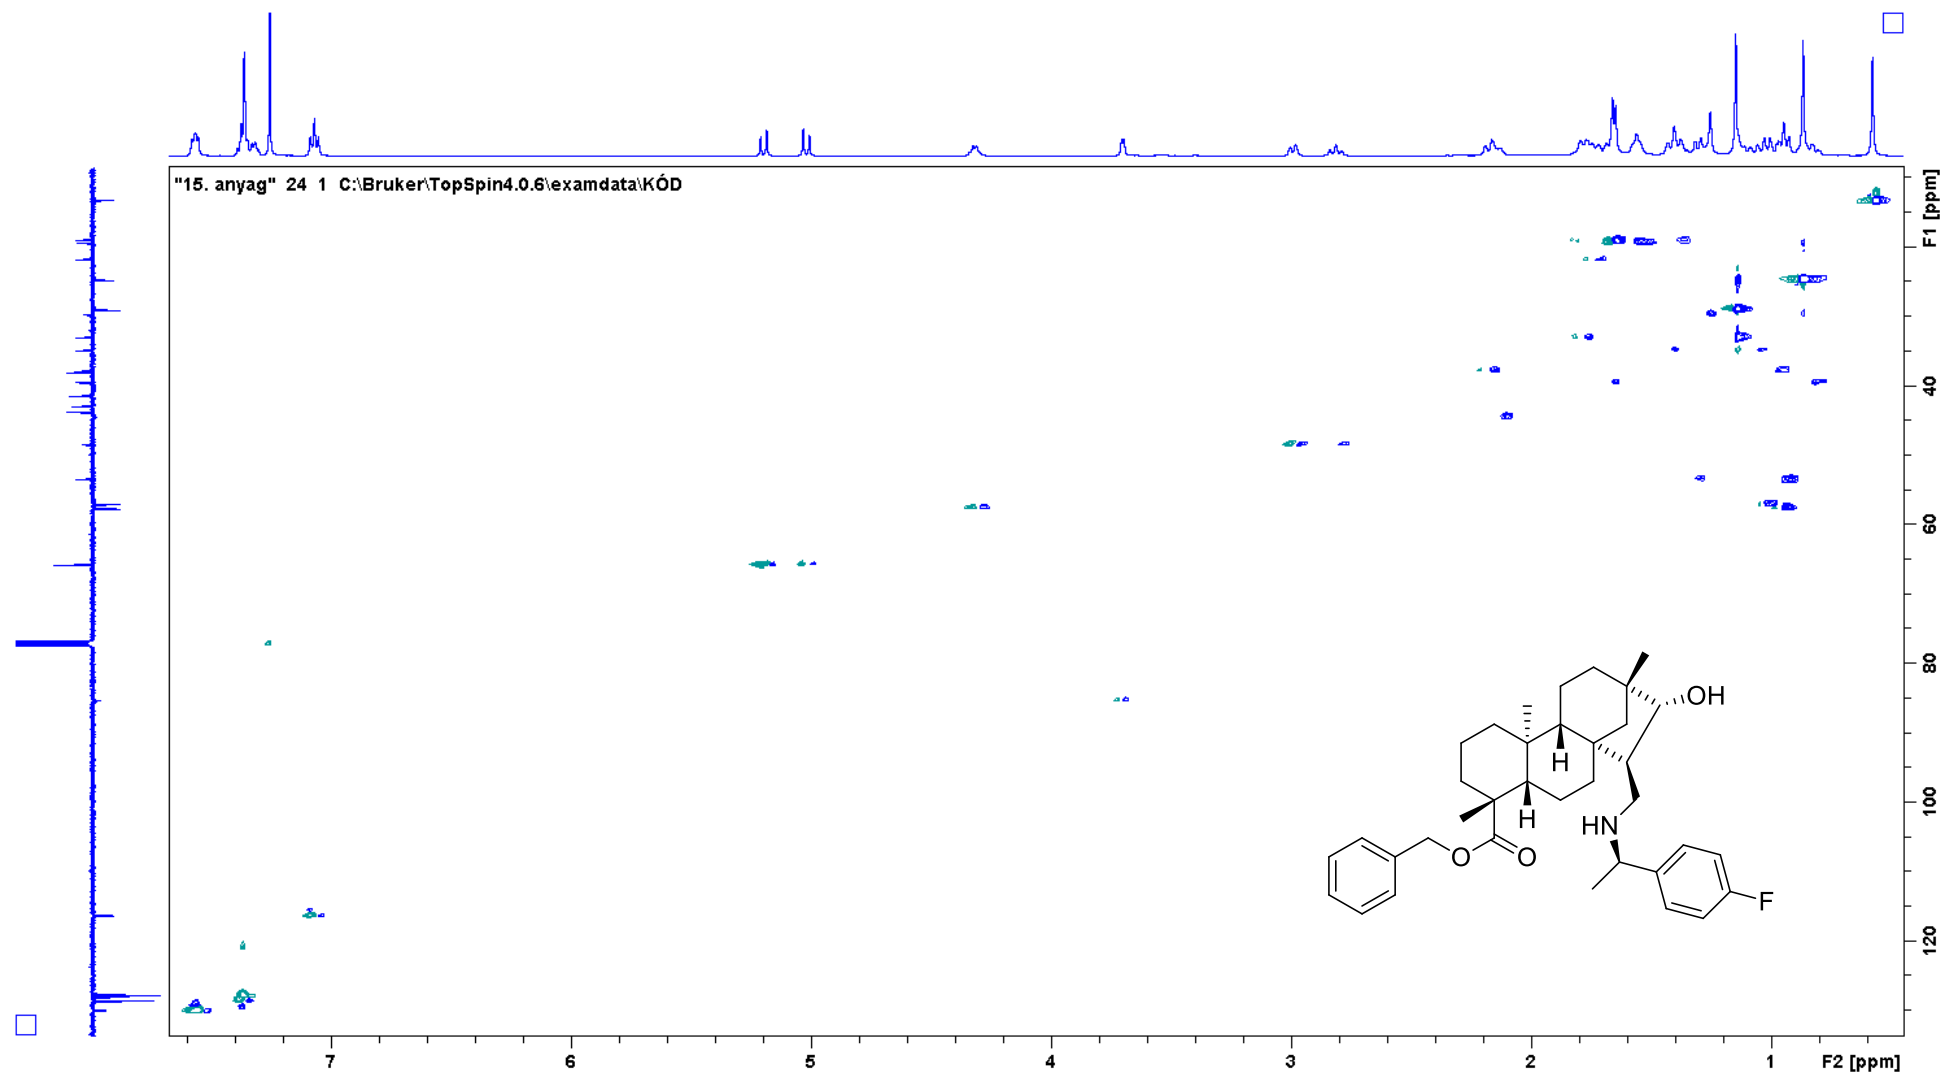

Figure S72

HSQC of compound (4*R*,4*aS*,6*aS*,7*R*,8*R*,9*S*,11*bS*)-Benzyl 7-((((*R*)-1-(4-fluorophenyl)ethyl)amino)methyl)-8-hydroxy-4,9,11*b*-trimethyltetradecahydro-6*a*,9-methanocyclohepta[*a*]naphthalene-4-carboxylate (**15**):

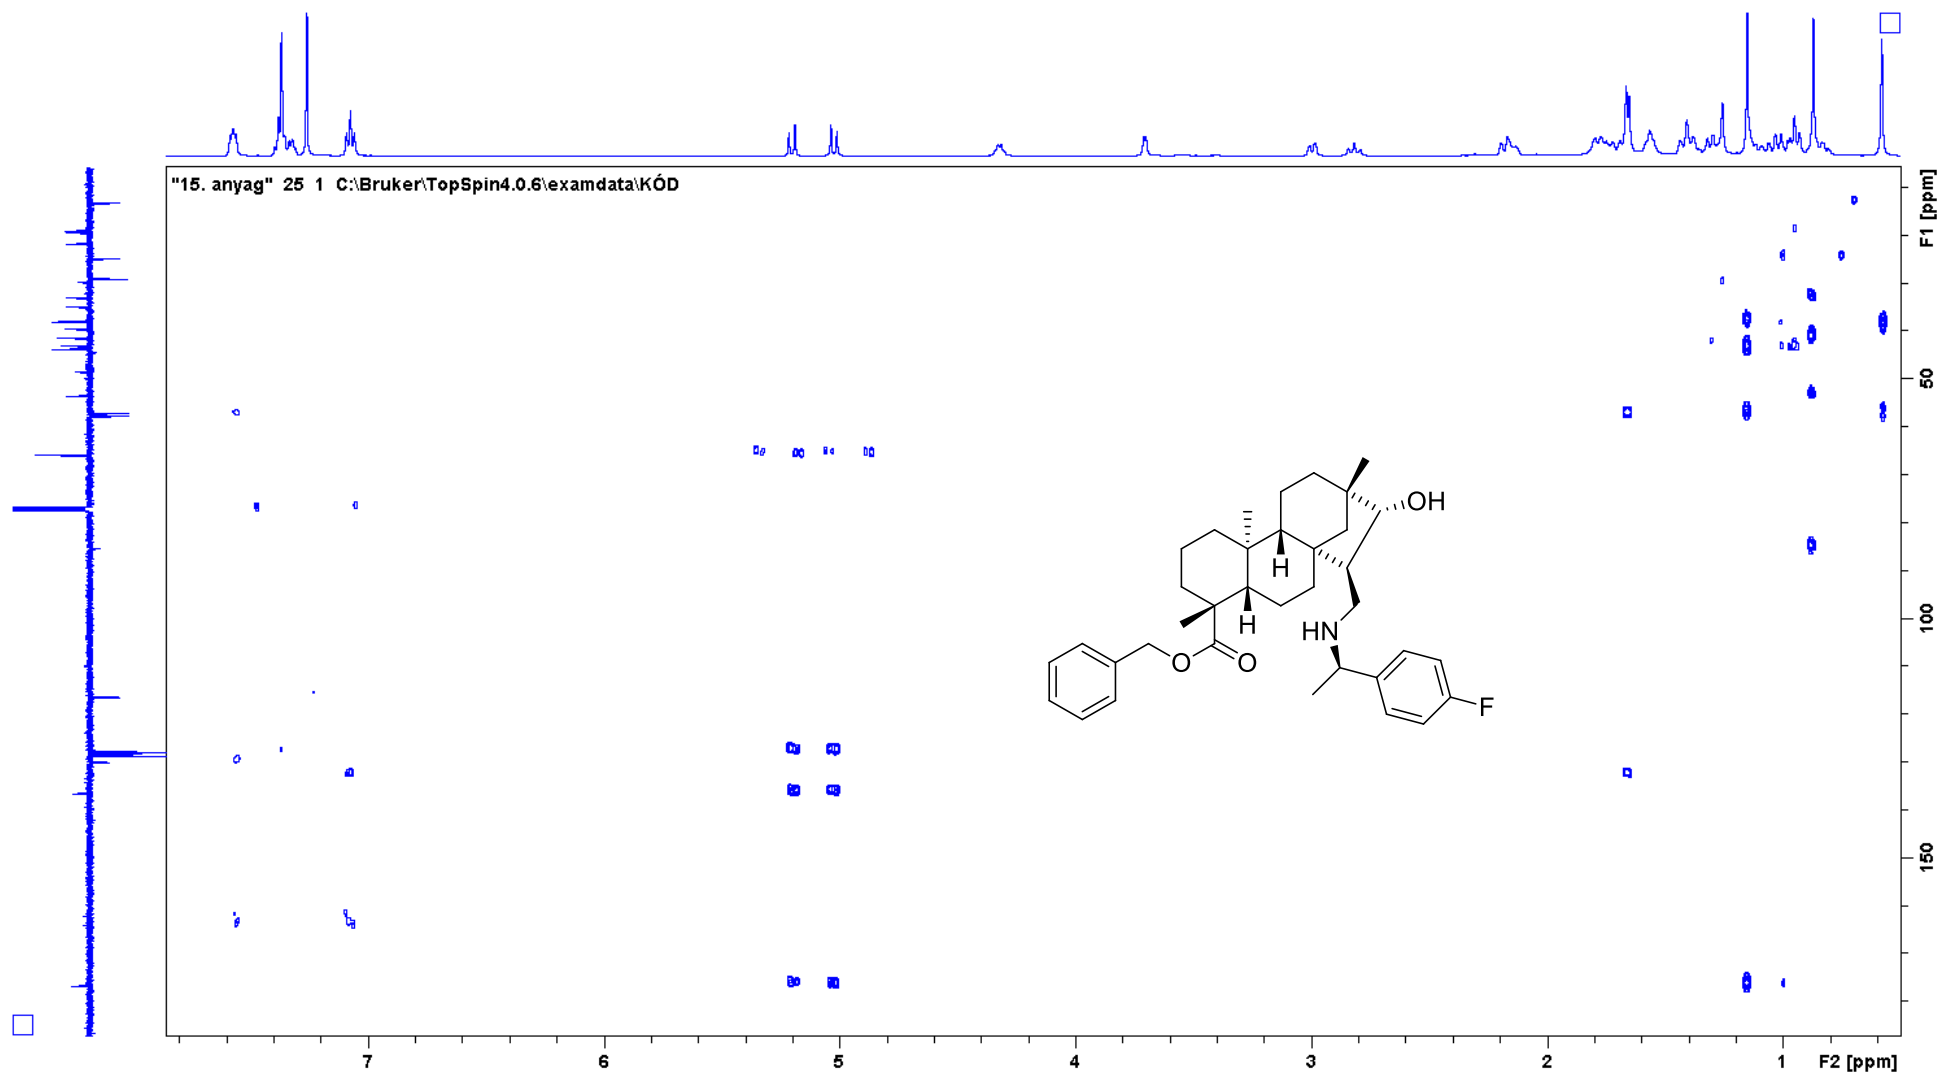

Figure S73

<sup>1</sup>H-NMR of compound (4*R*,4*aS*,6*aS*,7*R*,8*R*,9*S*,11*bS*)-Benzyl 8-hydroxy-4,9,11*b*-trimethyl-7-((((*R*)-1-phenylpropyl)amino)methyl)tetradecahydro-6*a*,9-methanocyclohepta[*a*]naphthalene-4-carboxylate (**16**):

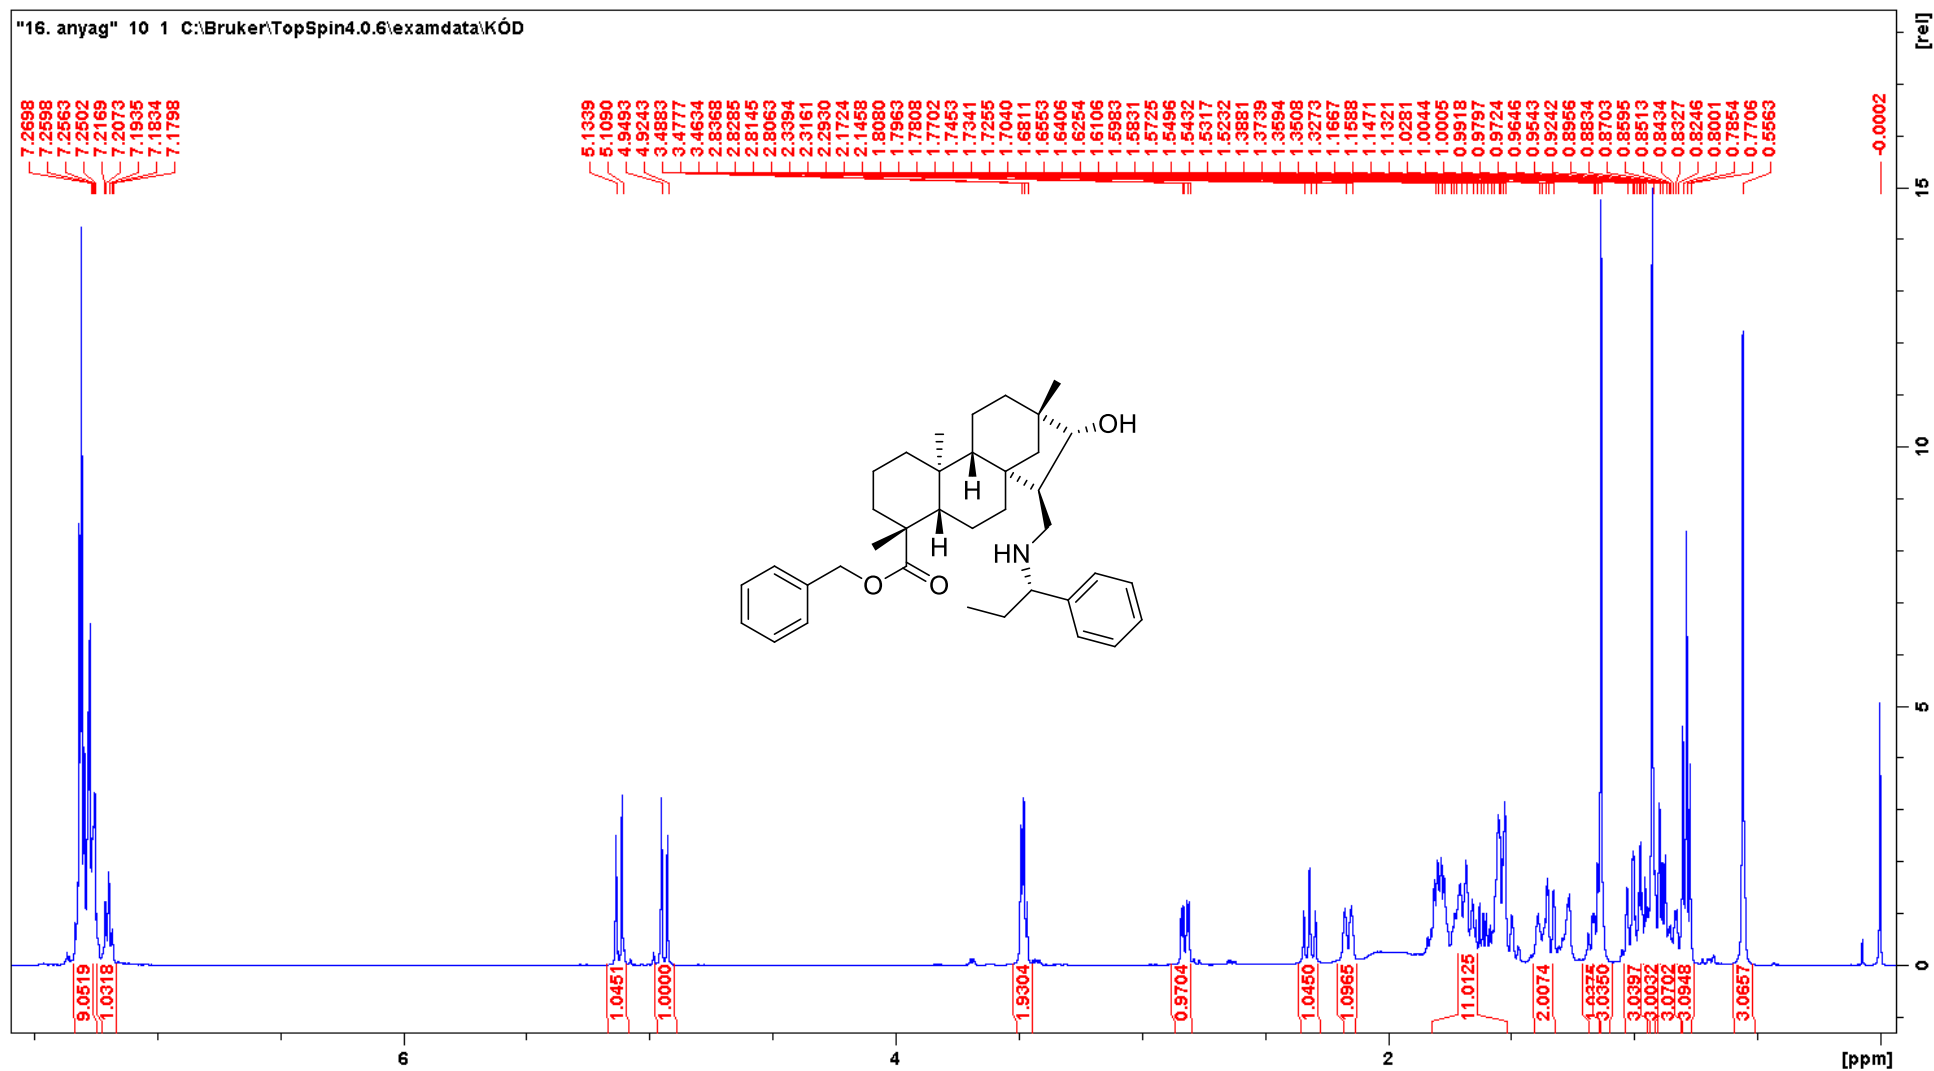

Figure S74

$^{13}\text{C}$ -NMR of compound (4*R*,4*aS*,6*aS*,7*R*,8*R*,9*S*,11*bS*)-Benzyl 8-hydroxy-4,9,11*b*-trimethyl-7-(((*R*)-1-phenylpropyl)amino)methyl)tetra decahydro-6*a*,9-methanocyclohepta[*a*]naphthalene-4-carboxylate (**16**):

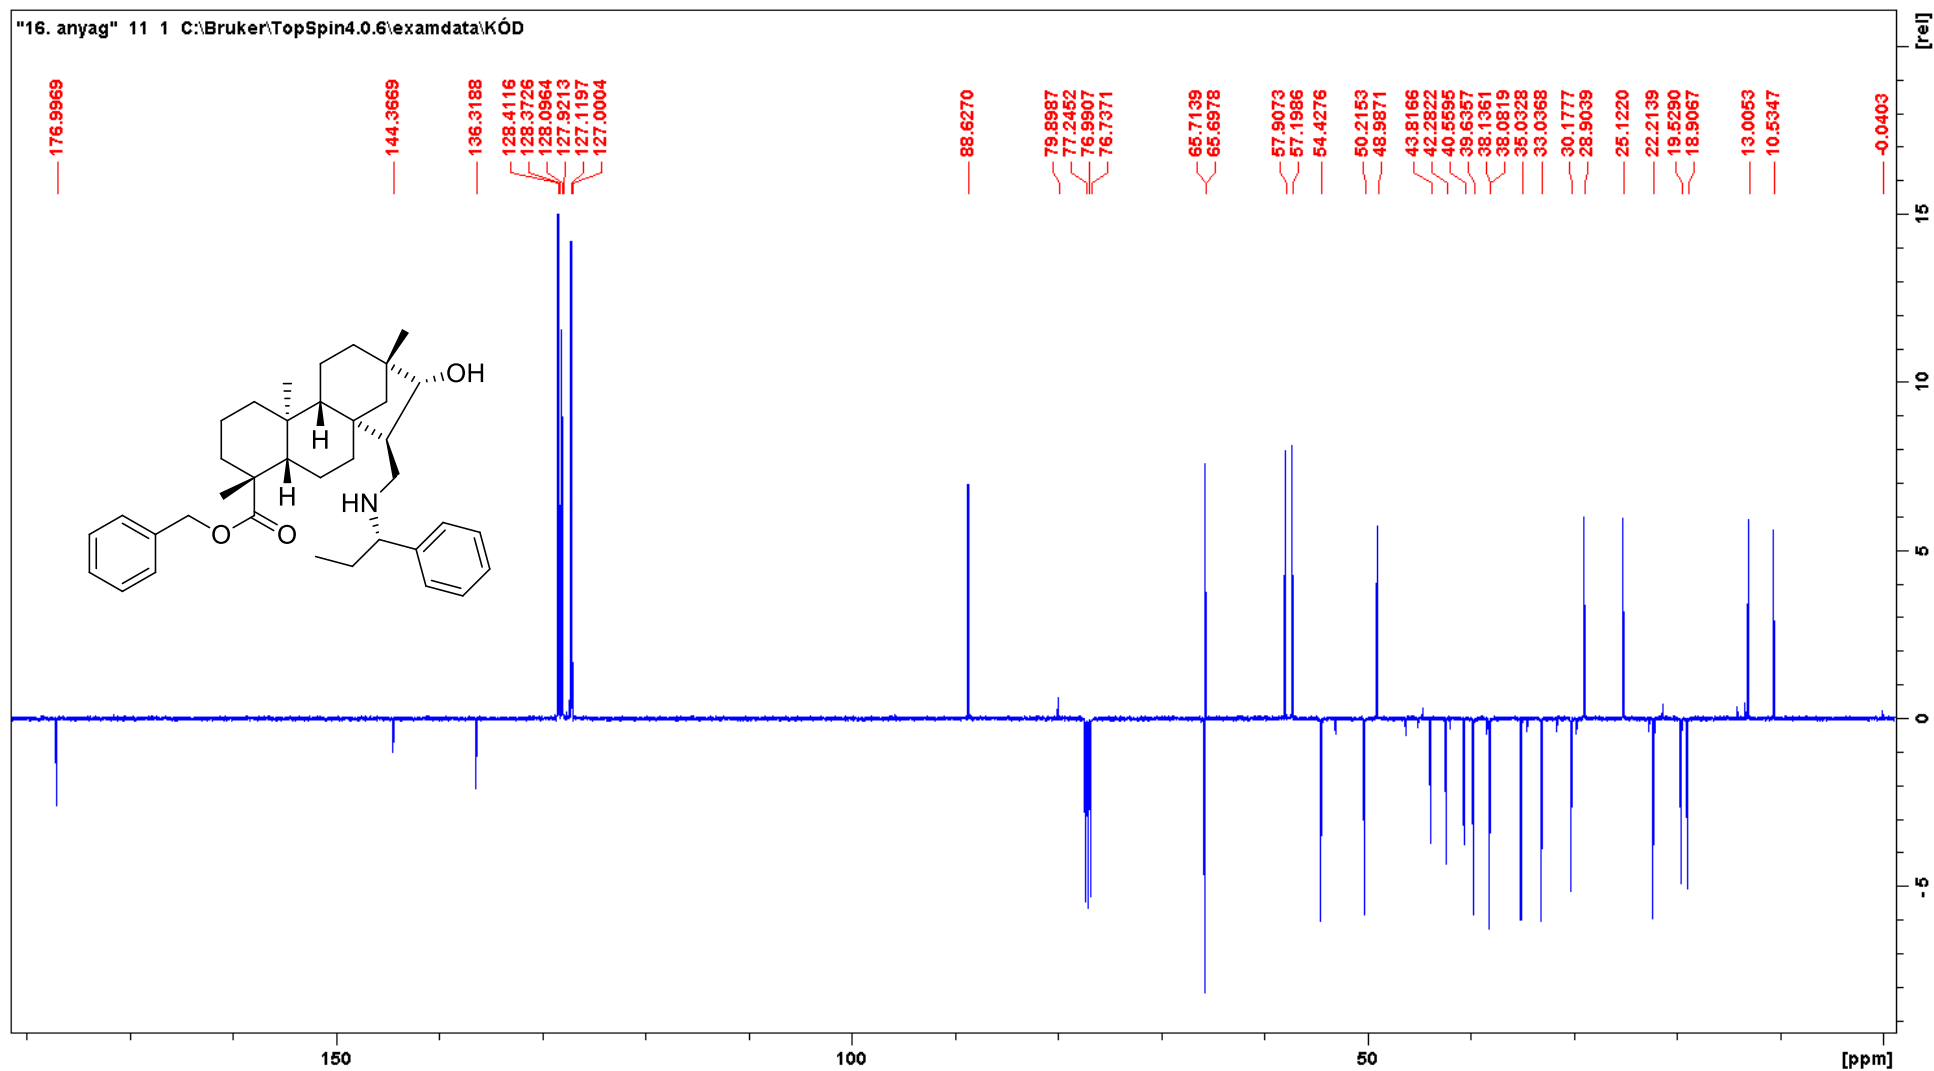

Figure S75

COSY of compound (4*R*,4*aS*,6*aS*,7*R*,8*R*,9*S*,11*bS*)-Benzyl 8-hydroxy-4,9,11*b*-trimethyl-7-(((*R*)-1-phenylpropyl)amino)methyl)tetradecahydro-6*a*,9-methanocyclohepta[*a*]naphthalene-4-carboxylate (**16**):

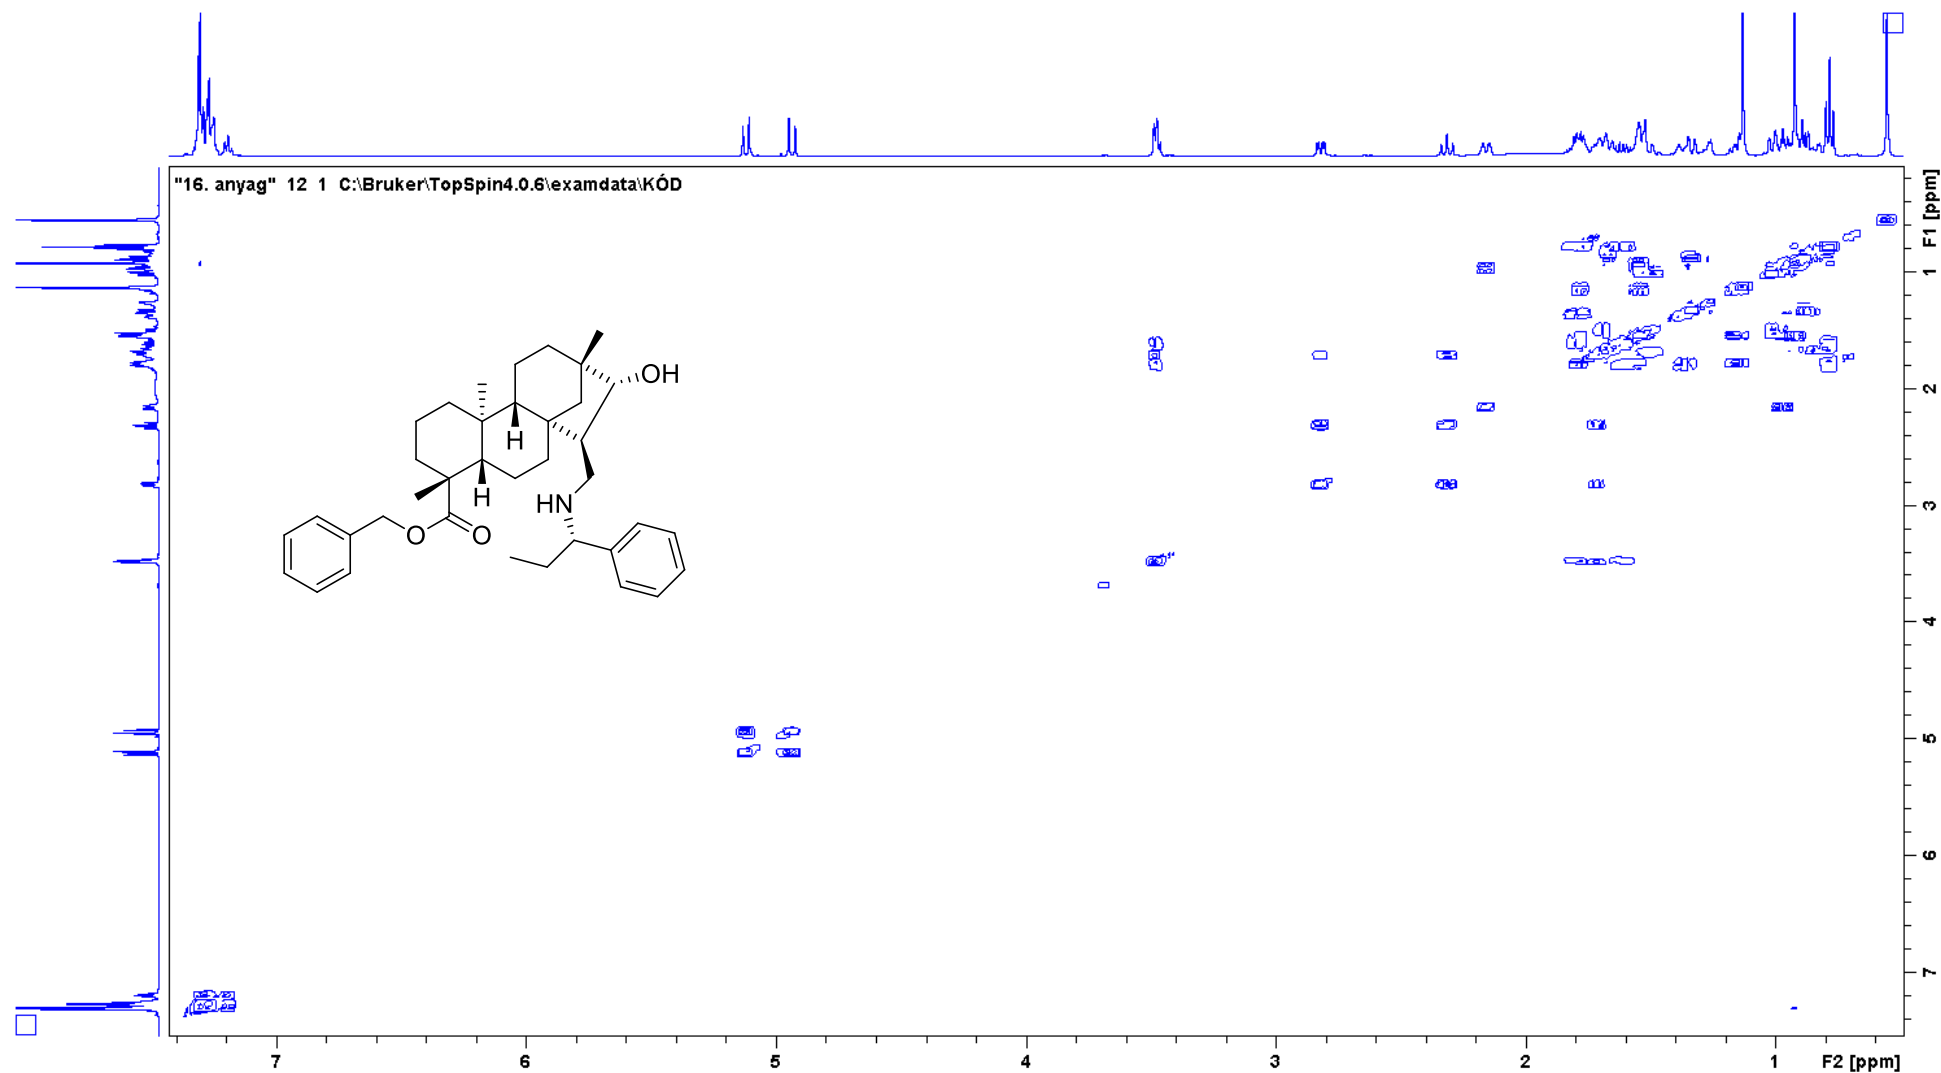

Figure S76

NOESY of compound (4*R*,4*aS*,6*aS*,7*R*,8*R*,9*S*,11*bS*)-Benzyl 8-hydroxy-4,9,11*b*-trimethyl-7-(((*R*)-1-phenylpropyl)amino)methyl)tetradecahydro-6*a*,9-methanocyclohepta[*a*]naphthalene-4-carboxylate (**16**):

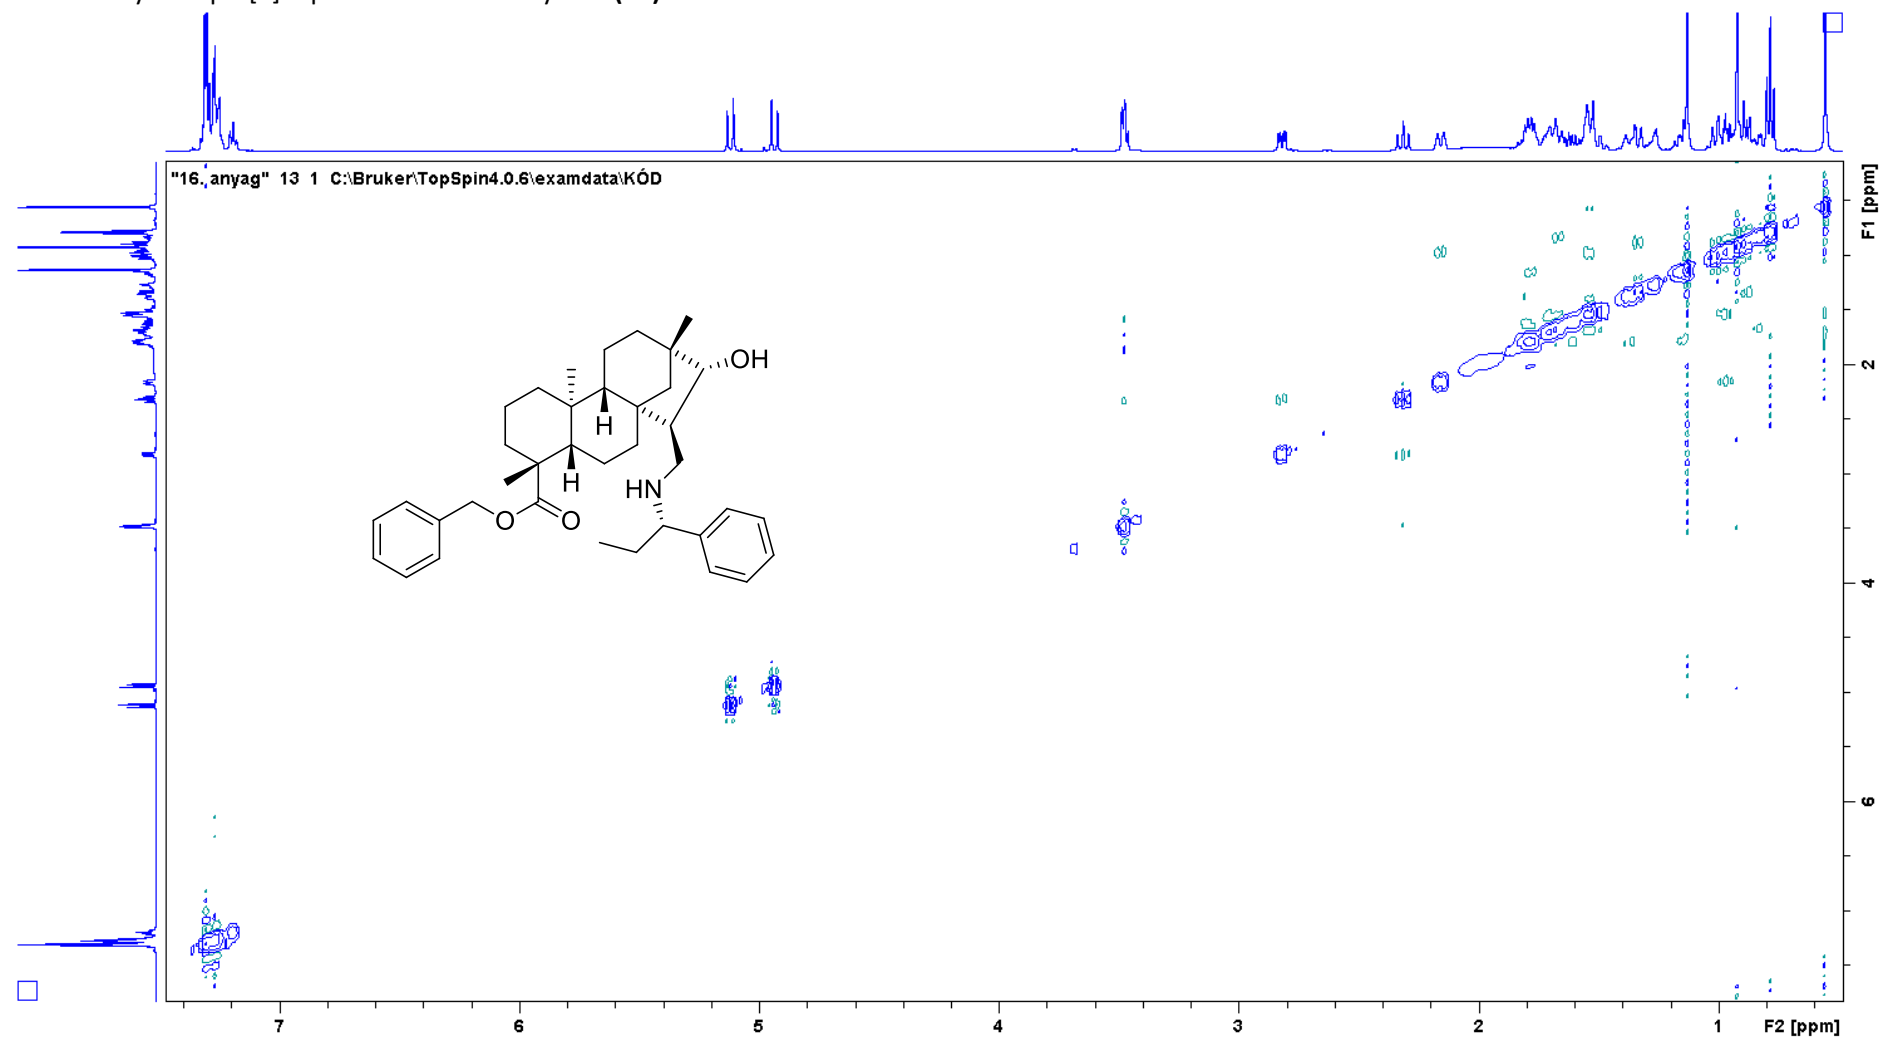

Figure S77

HSQC of compound (4*R*,4*aS*,6*aS*,7*R*,8*R*,9*S*,11*bS*)-Benzyl 8-hydroxy-4,9,11*b*-trimethyl-7-(((*R*)-1-phenylpropyl)amino)methyl)tetradecahydro-6*a*,9-methanocyclohepta[*a*]naphthalene-4-carboxylate (**16**):

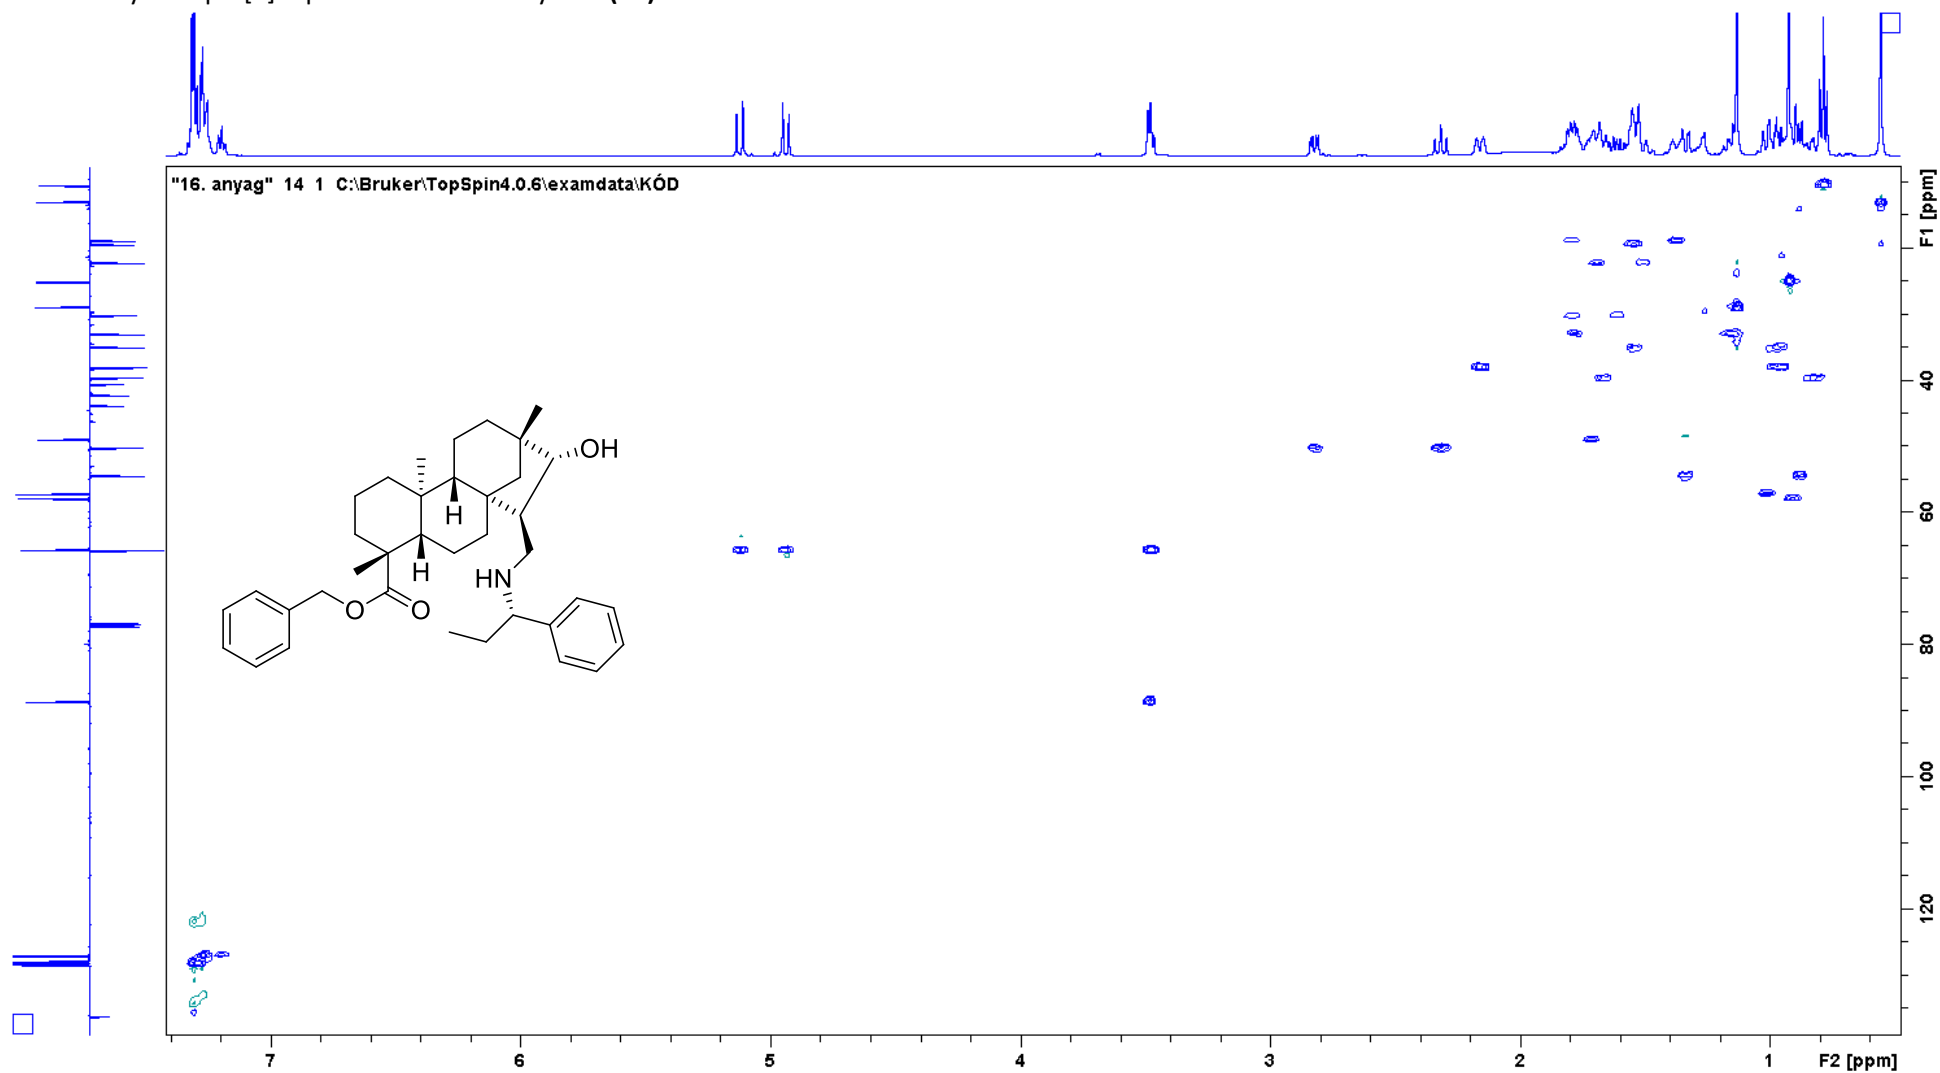



Figure S78

HMBC of compound (4*R*,4*aS*,6*aS*,7*R*,8*R*,9*S*,11*bS*)-Benzyl 8-hydroxy-4,9,11*b*-trimethyl-7-(((*R*)-1-phenylpropyl)amino)methyl)tetradecahydro-6*a*,9-methanocyclohepta[*a*]naphthalene-4-carboxylate (**16**):

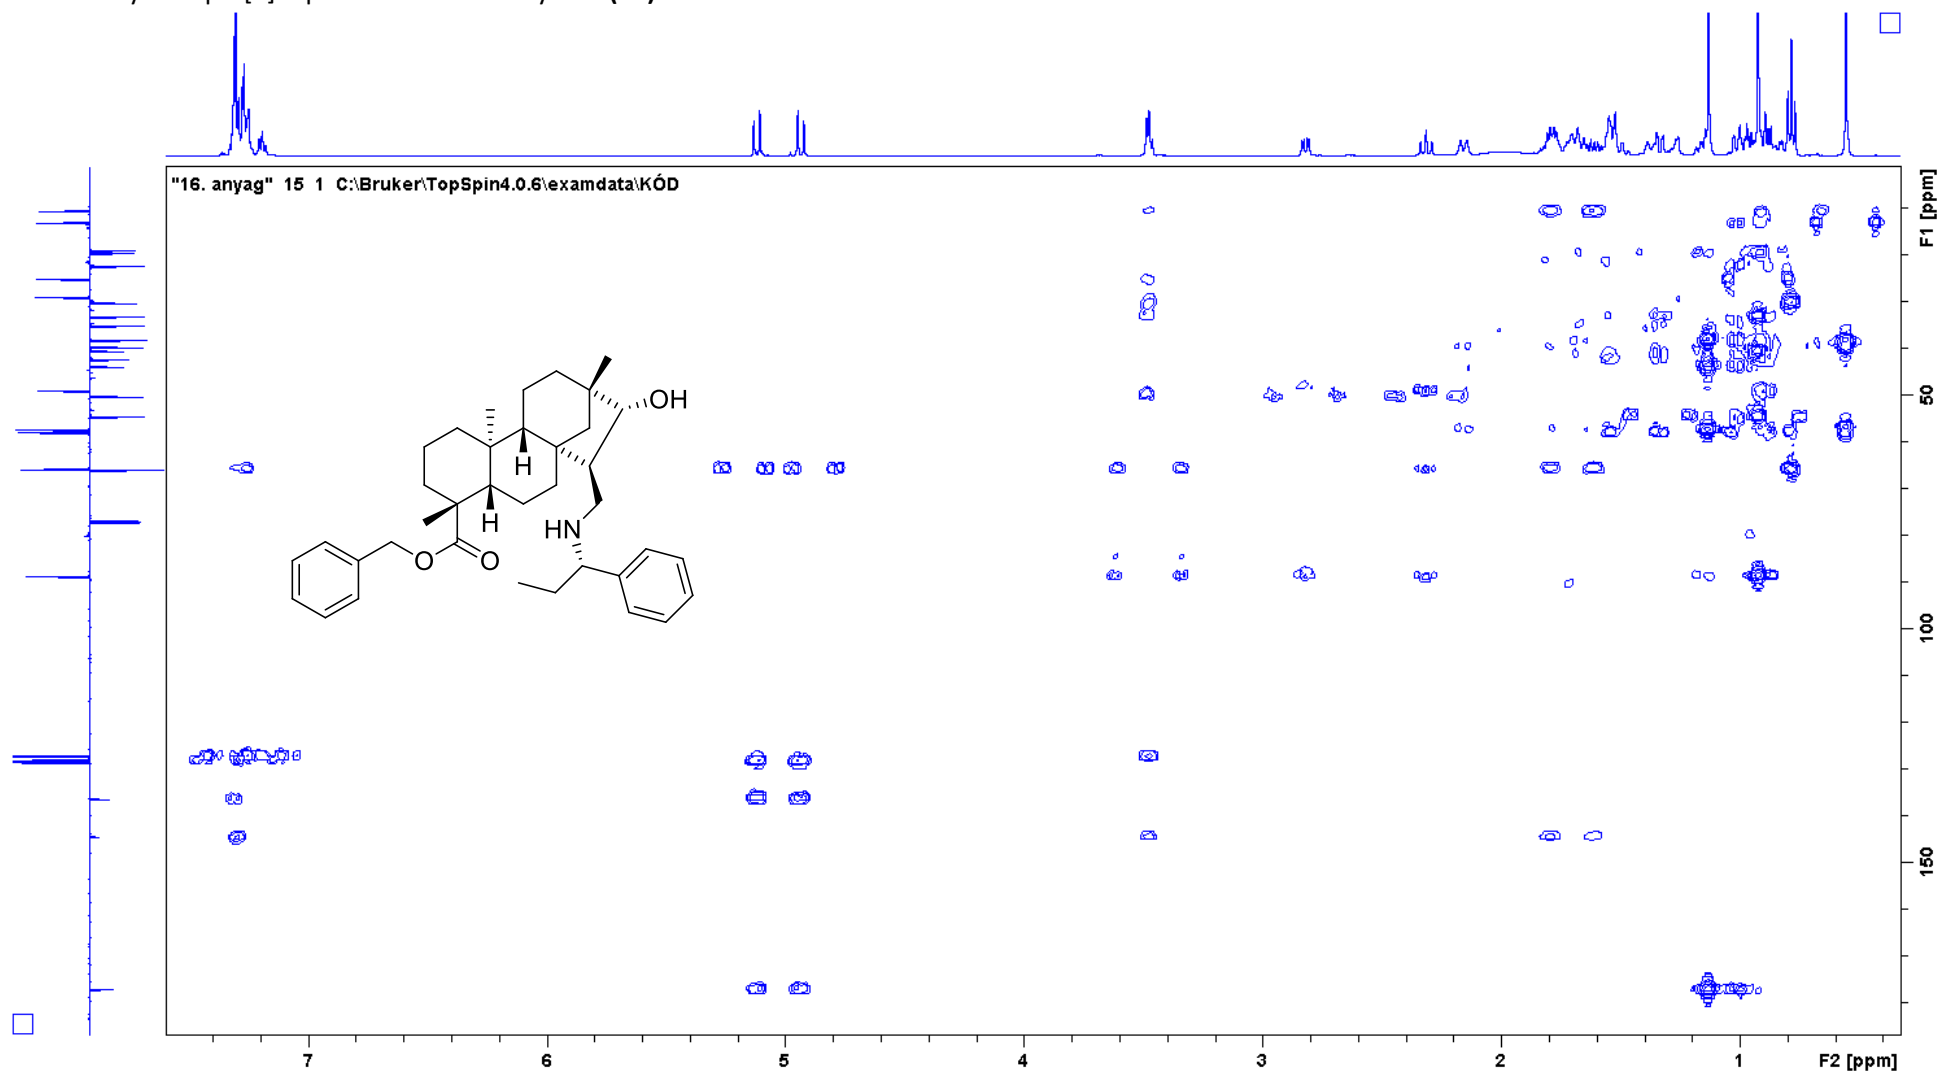

Figure S79

<sup>1</sup>H-NMR of compound (4*R*,4*aS*,6*aS*,7*R*,8*R*,9*S*,11*bS*)-Benzyl 8-hydroxy-4,9,11*b*-trimethyl-7-((((*S*)-1-phenylpropyl)amino)methyl)tetradecahydro-6*a*,9-methanocyclohepta[*a*]naphthalene-4-carboxylate (**17**):

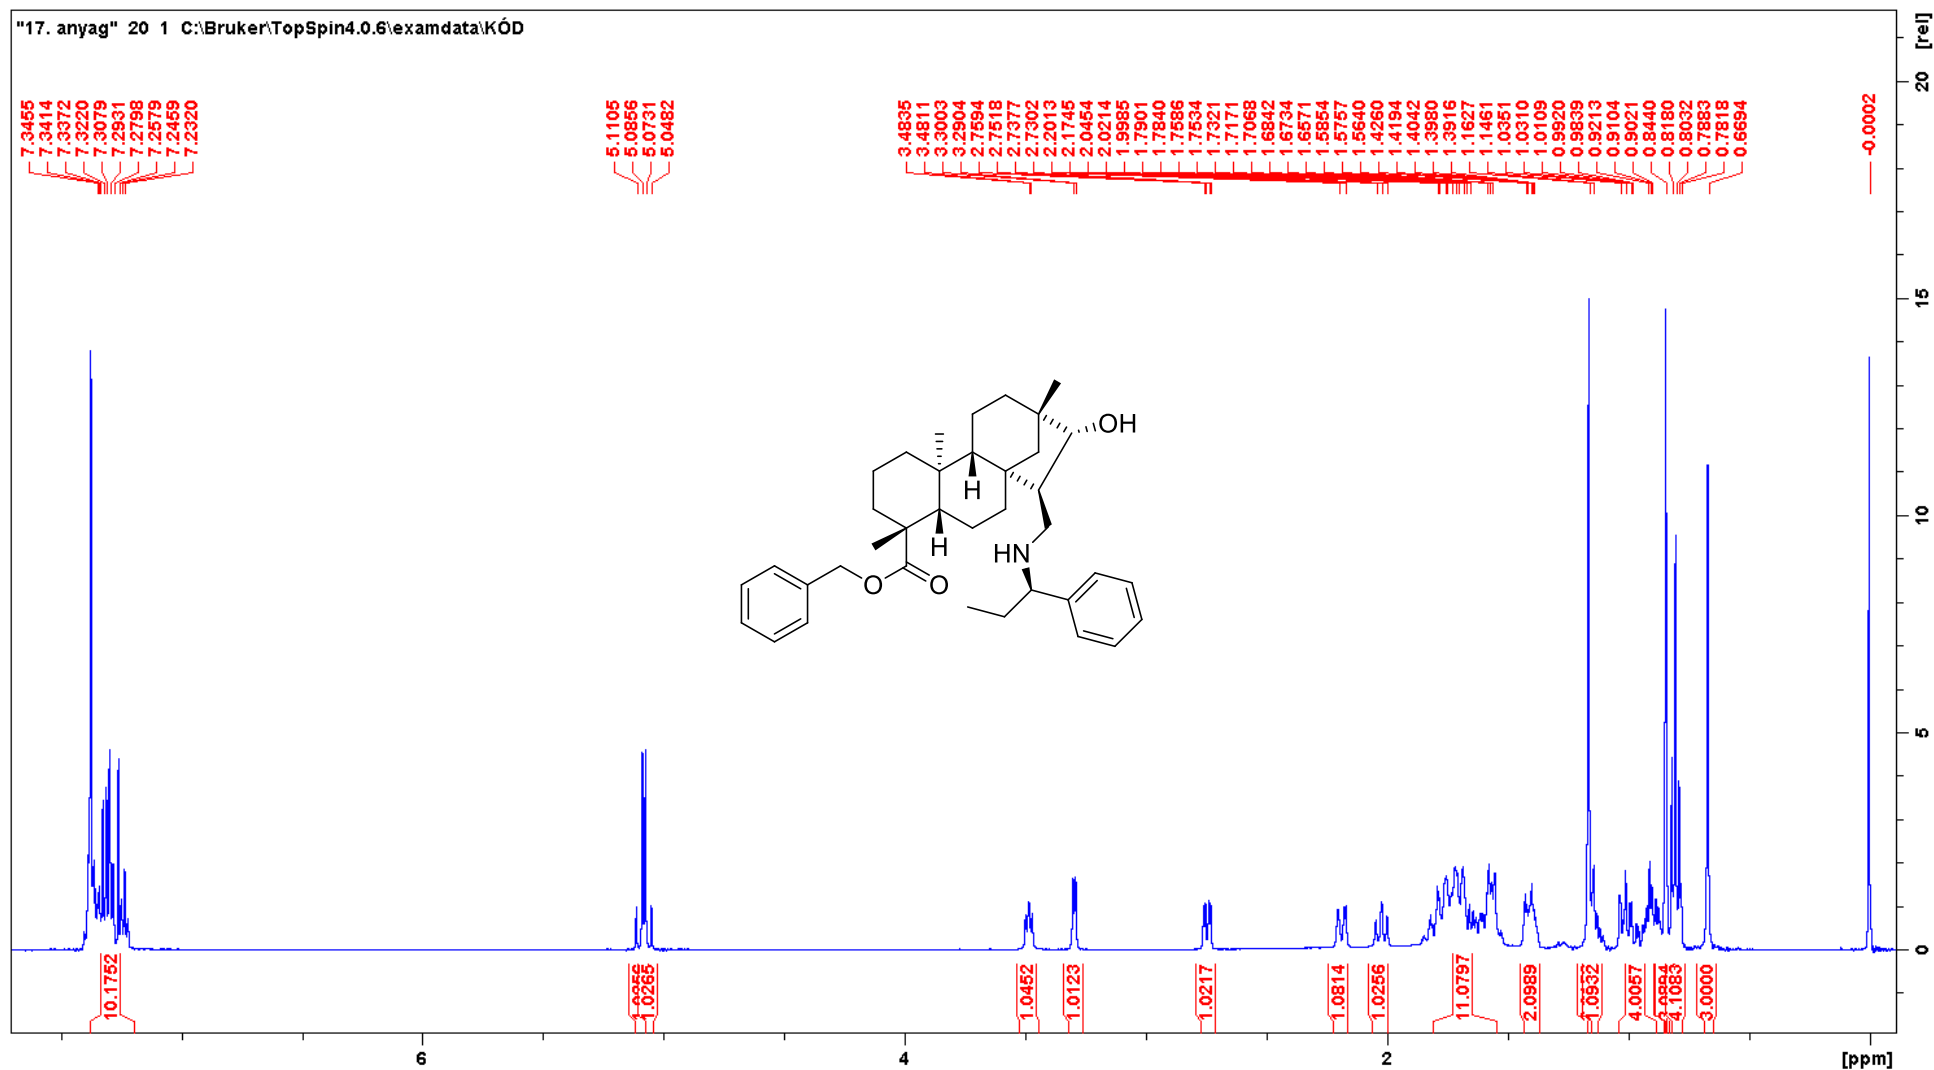

Figure S80

$^{13}\text{C}$ -NMR of compound (4*R*,4*aS*,6*aS*,7*R*,8*R*,9*S*,11*bS*)-Benzyl 8-hydroxy-4,9,11*b*-trimethyl-7-(((*S*)-1-phenylpropyl)amino)methyl)tetradeca-hydro-6*a*,9-methanocyclohepta[*a*]naphthalene-4-carboxylate (**17**):

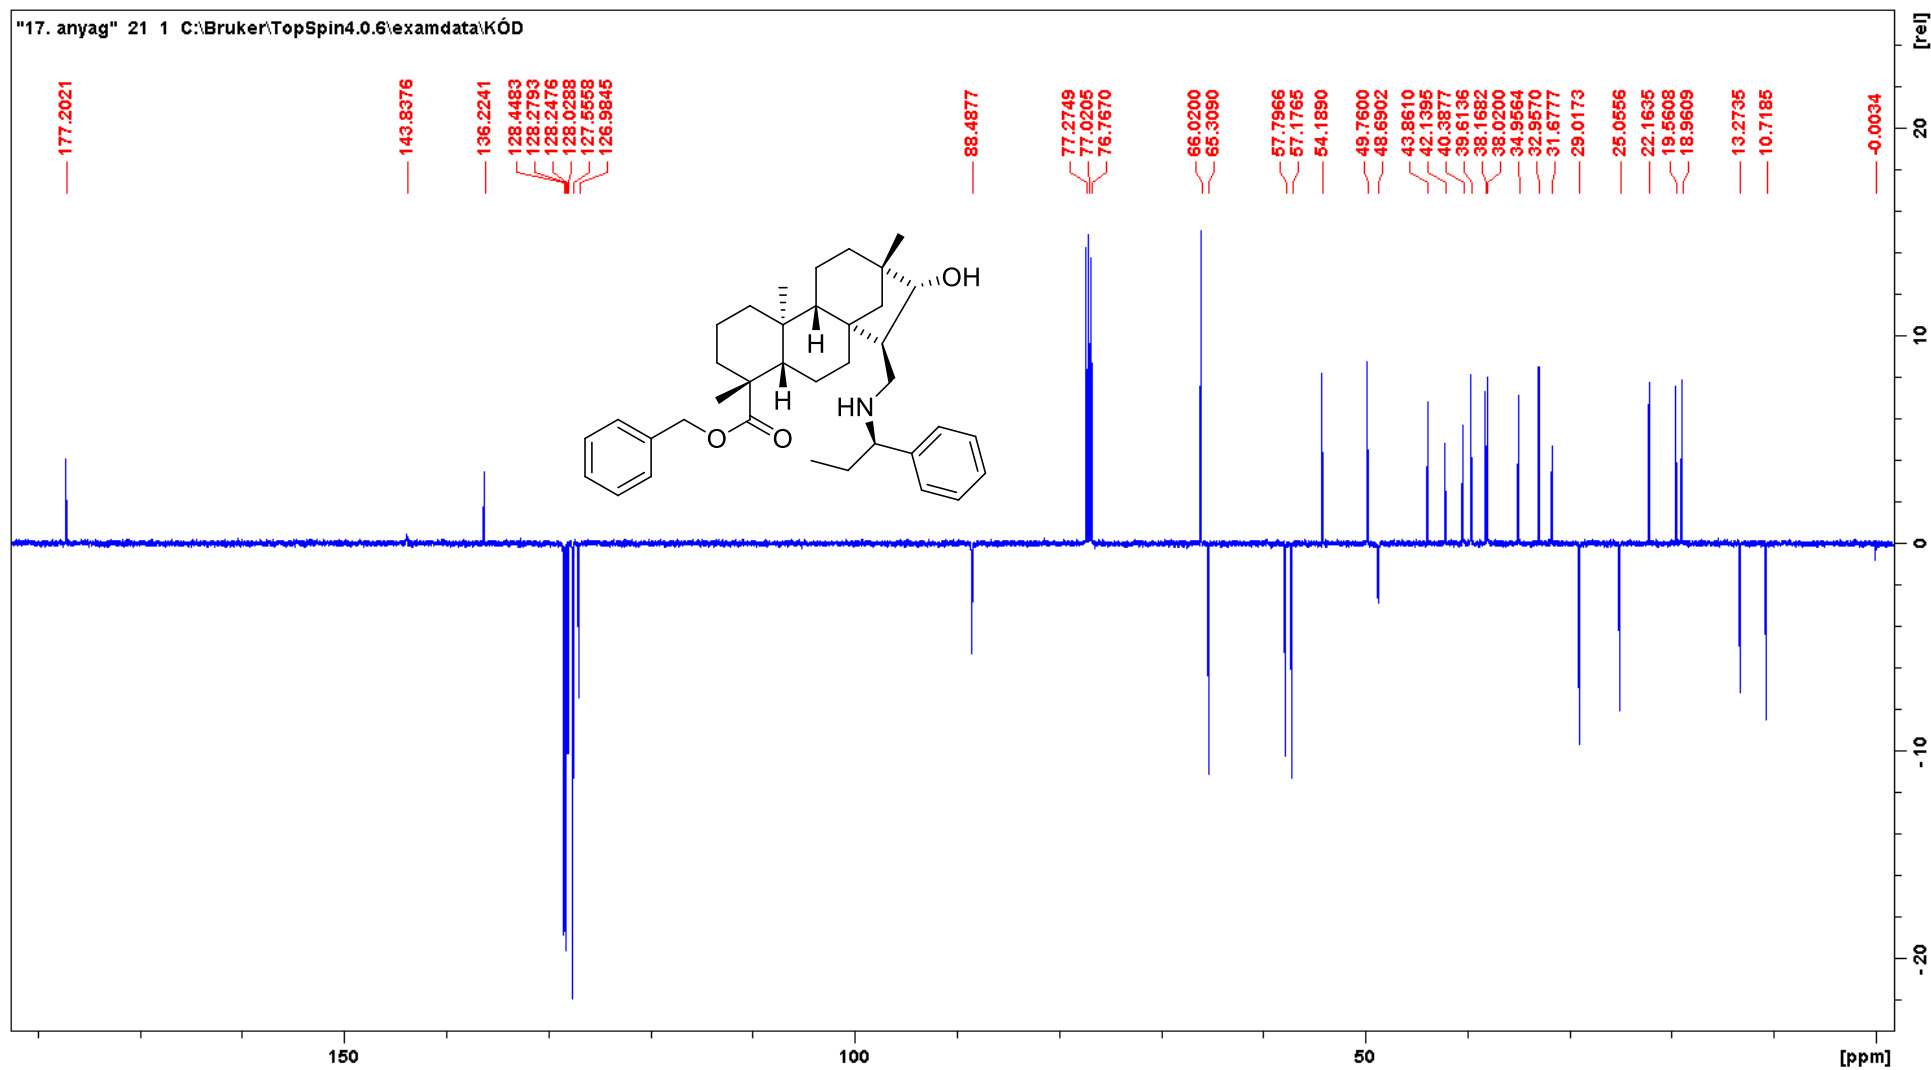

Figure S81

COSY of compound (4*R*,4*aS*,6*aS*,7*R*,8*R*,9*S*,11*bS*)-Benzyl 8-hydroxy-4,9,11*b*-trimethyl-7-(((*S*)-1-phenylpropyl)amino)methyl)tetradecahydro-6*a*,9-methanocyclohepta[*a*]naphthalene-4-carboxylate (**17**):

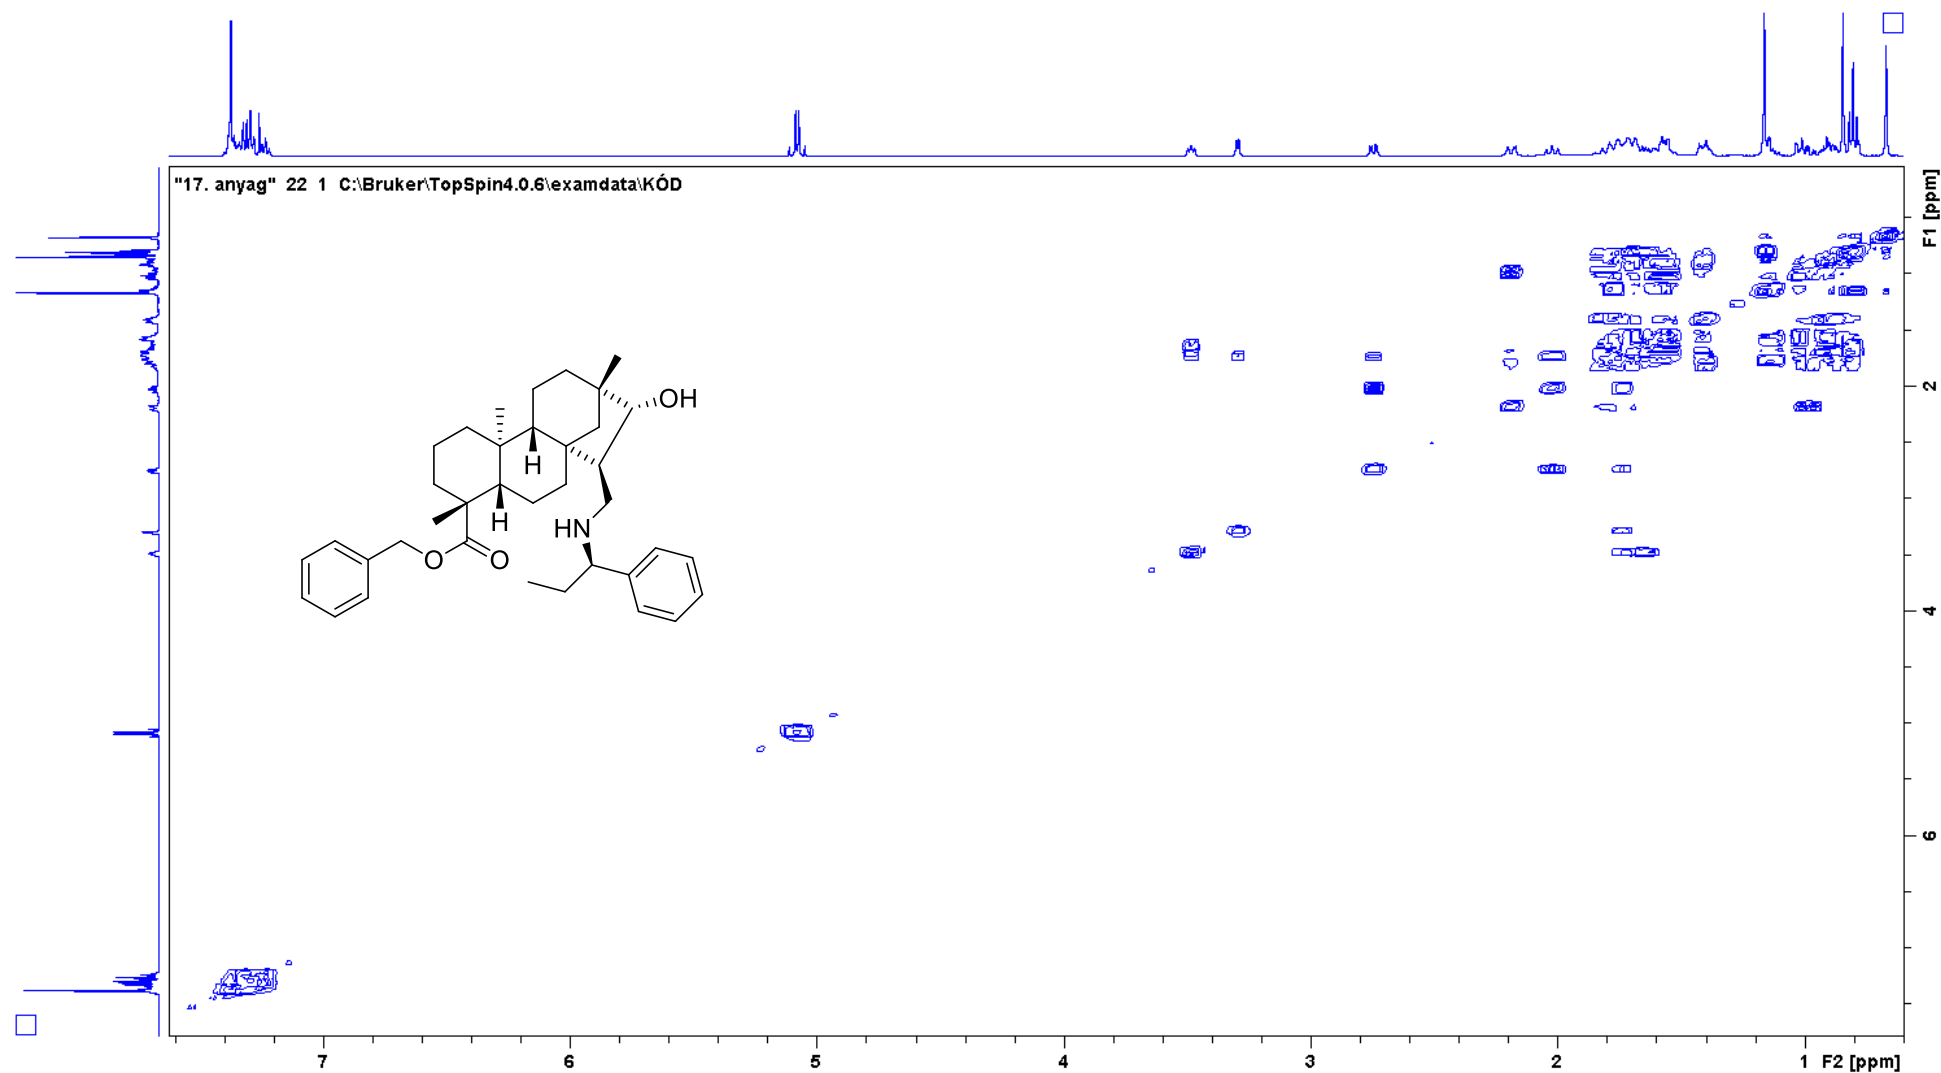

Figure S82

NOESY of compound (4*R*,4*aS*,6*aS*,7*R*,8*R*,9*S*,11*bS*)-Benzyl 8-hydroxy-4,9,11*b*-trimethyl-7-(((*S*)-1-phenylpropyl)amino)methyl)tetradecahydro-6*a*,9-methanocyclohepta[*a*]naphthalene-4-carboxylate (**17**):

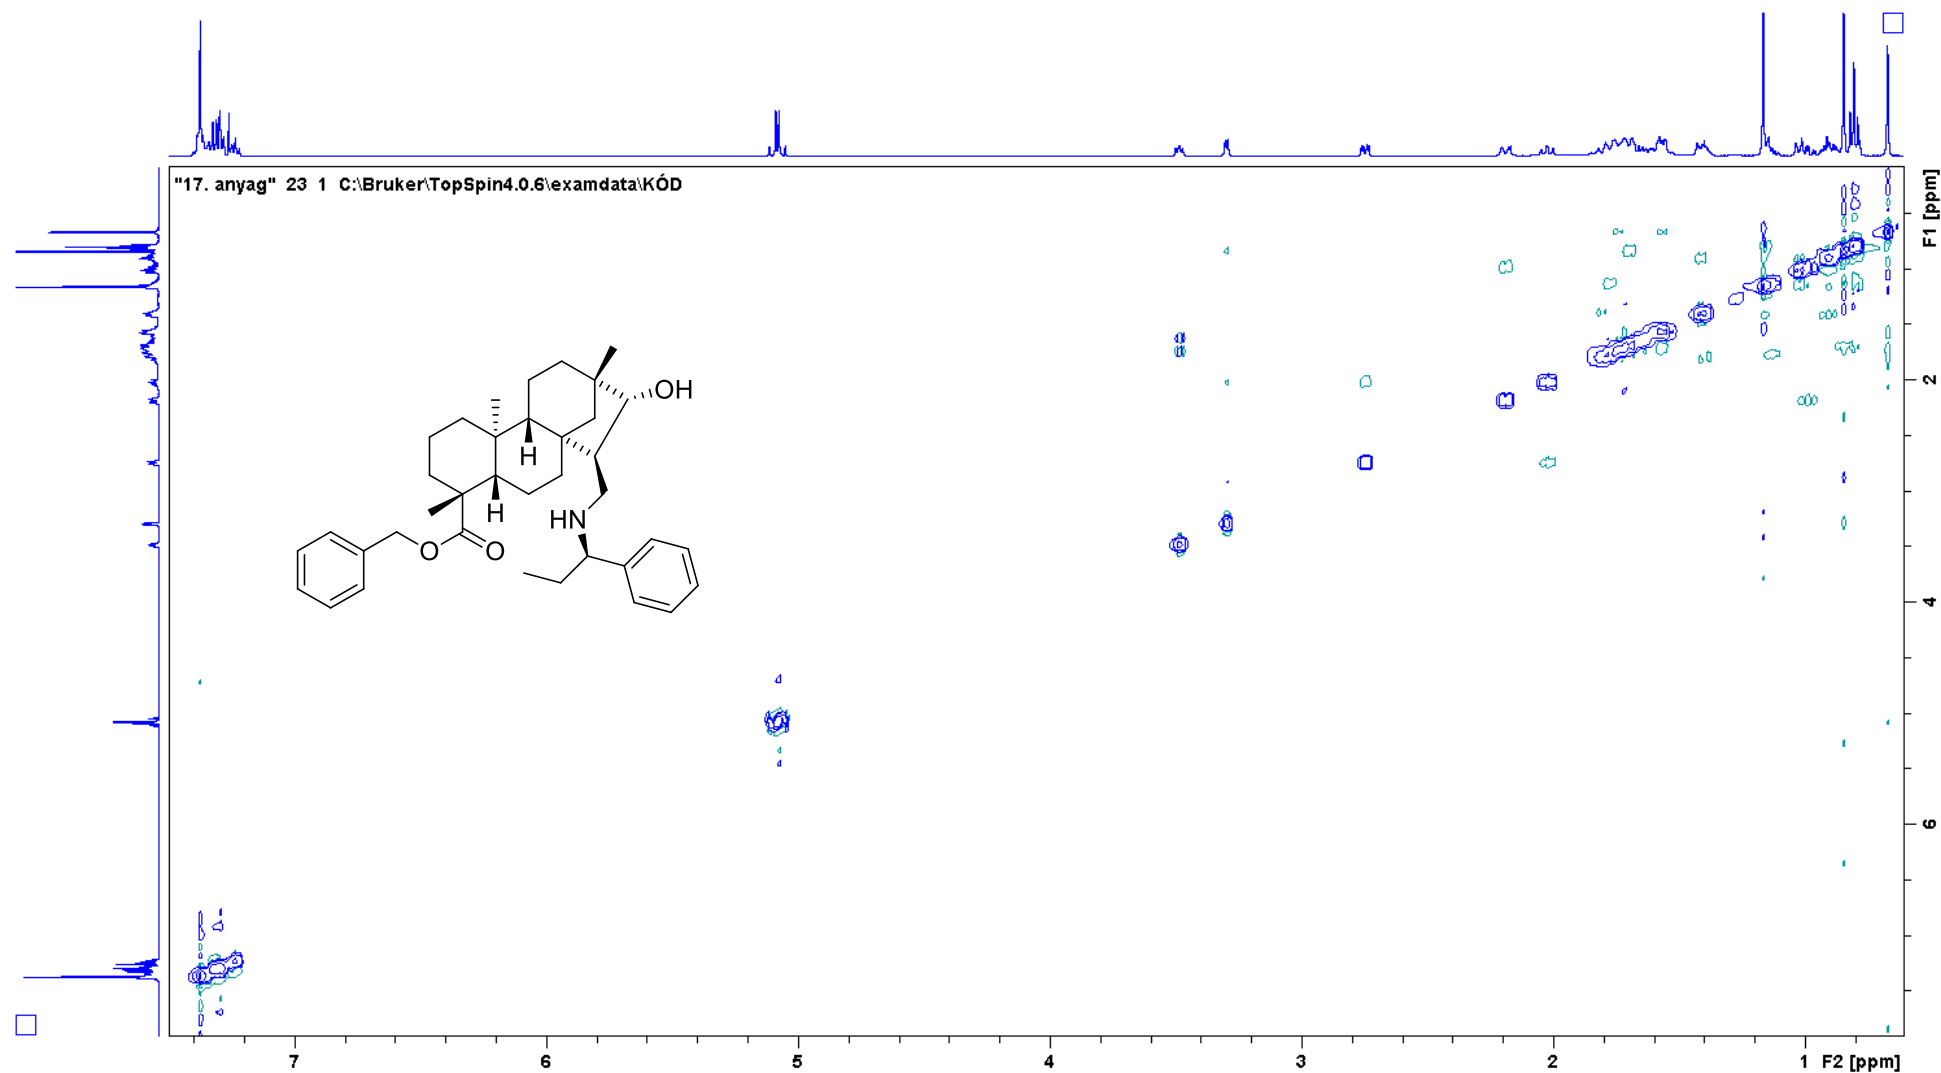

Figure S83

HSQC of compound (4*R*,4*aS*,6*aS*,7*R*,8*R*,9*S*,11*bS*)-Benzyl 8-hydroxy-4,9,11*b*-trimethyl-7-(((*S*)-1-phenylpropyl)amino)methyl)tetradecahydro-6*a*,9-methanocyclohepta[*a*]naphthalene-4-carboxylate (**17**):

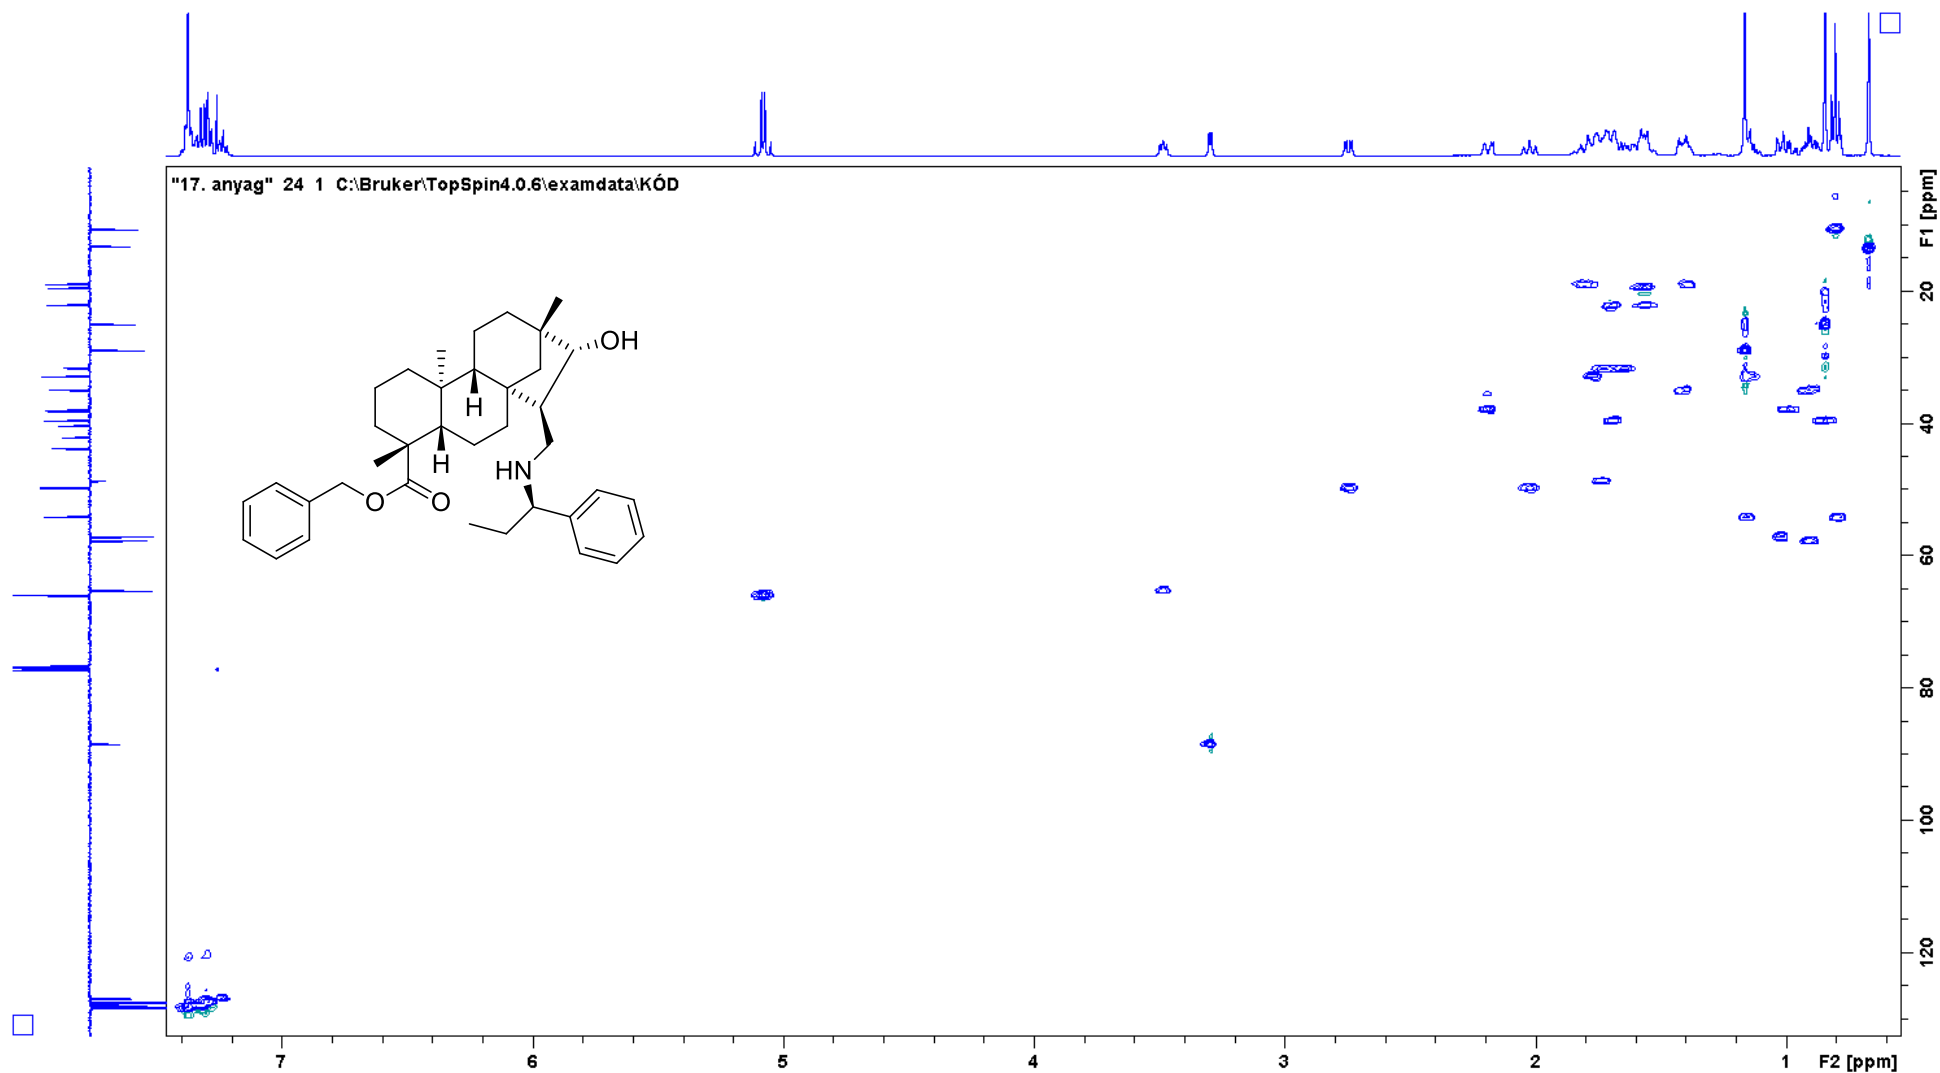

Figure S84

HMBC of compound (4*R*,4*aS*,6*aS*,7*R*,8*R*,9*S*,11*bS*)-Benzyl 8-hydroxy-4,9,11*b*-trimethyl-7-(((*S*)-1-phenylpropyl)amino)methyl)tetradecahydro-6*a*,9-methanocyclohepta[*a*]naphthalene-4-carboxylate (**17**):

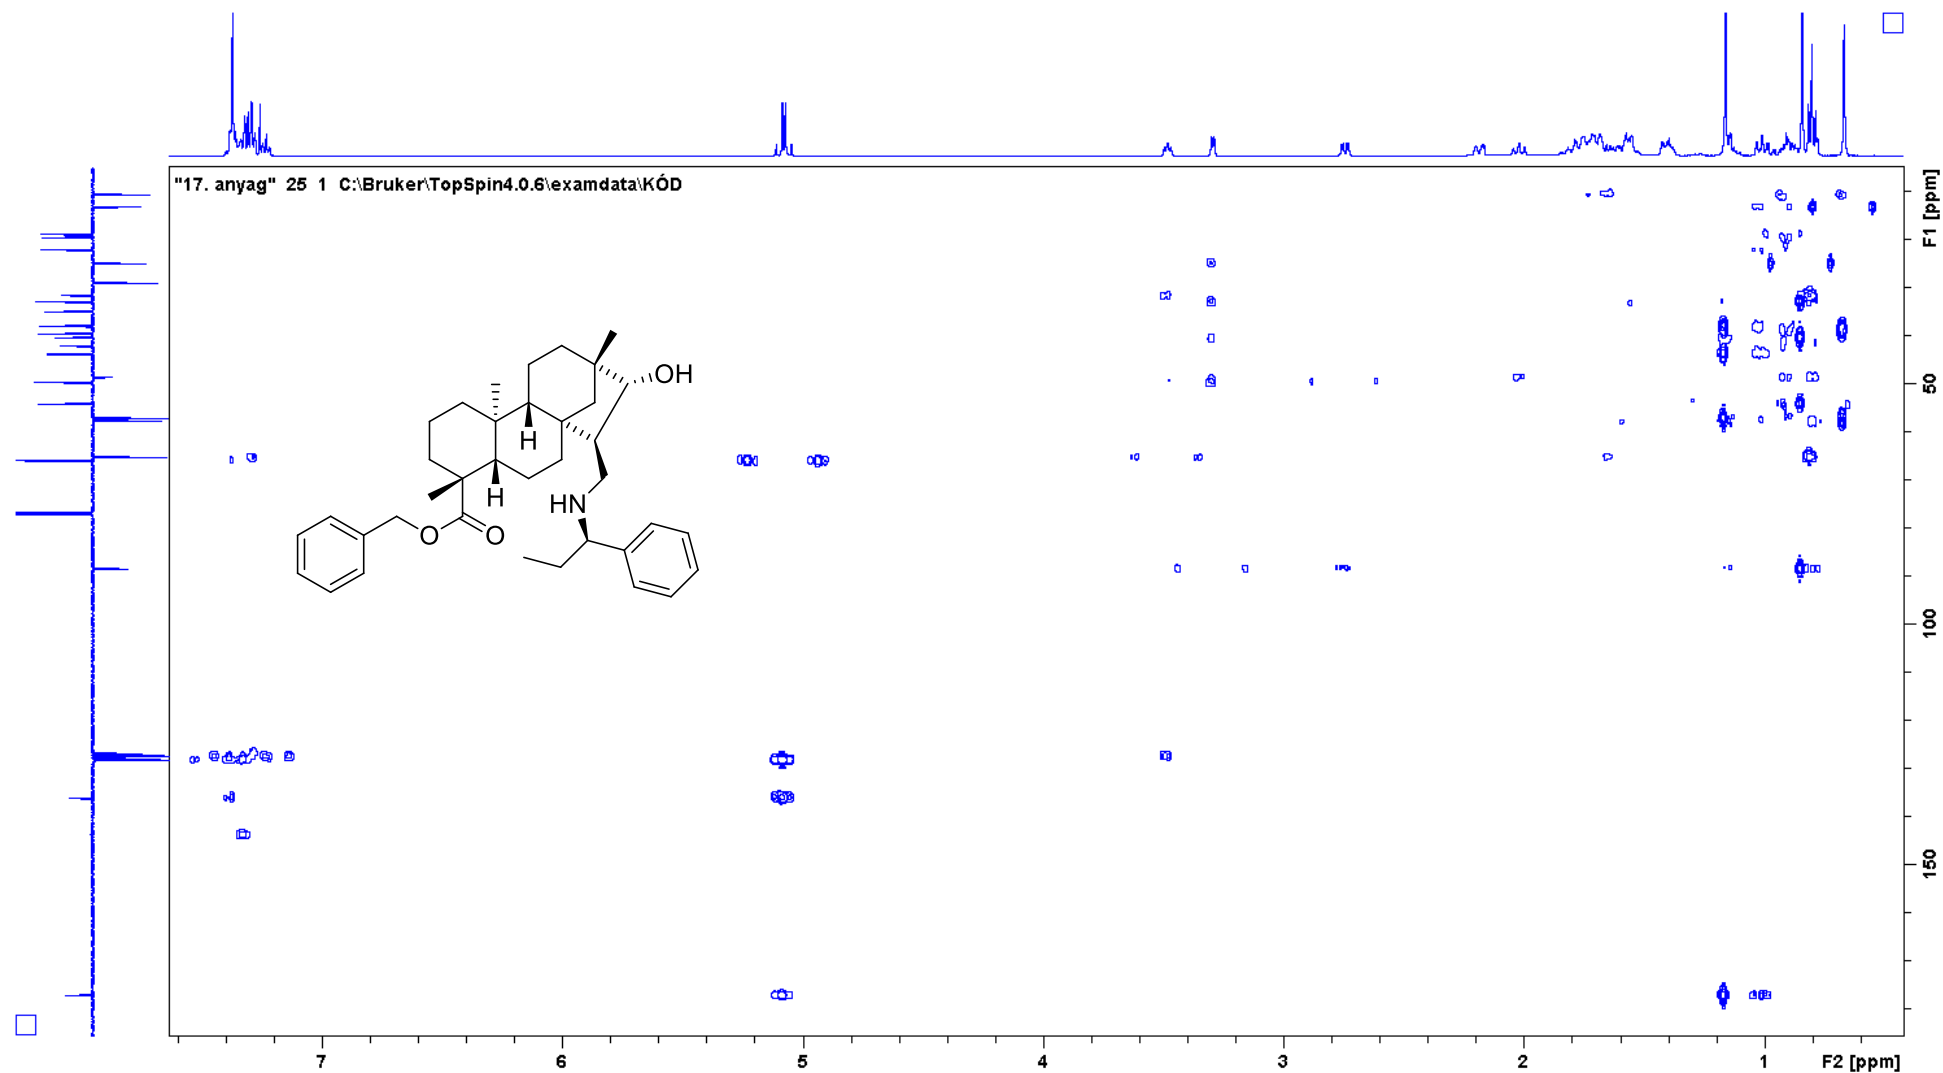

Figure S85

<sup>1</sup>H-NMR of compound (4*R*,4*aS*,6*aS*,7*R*,8*R*,9*S*,11*bS*)-Benzyl 8-hydroxy-4,9,11*b*-trimethyl-7-((((*R*)-1-(naphthalen-1-yl)ethyl)amino)methyl)tetradecahydro-6*a*,9-methanocyclohepta[*a*]naphthalene-4-carboxylate (**18**):

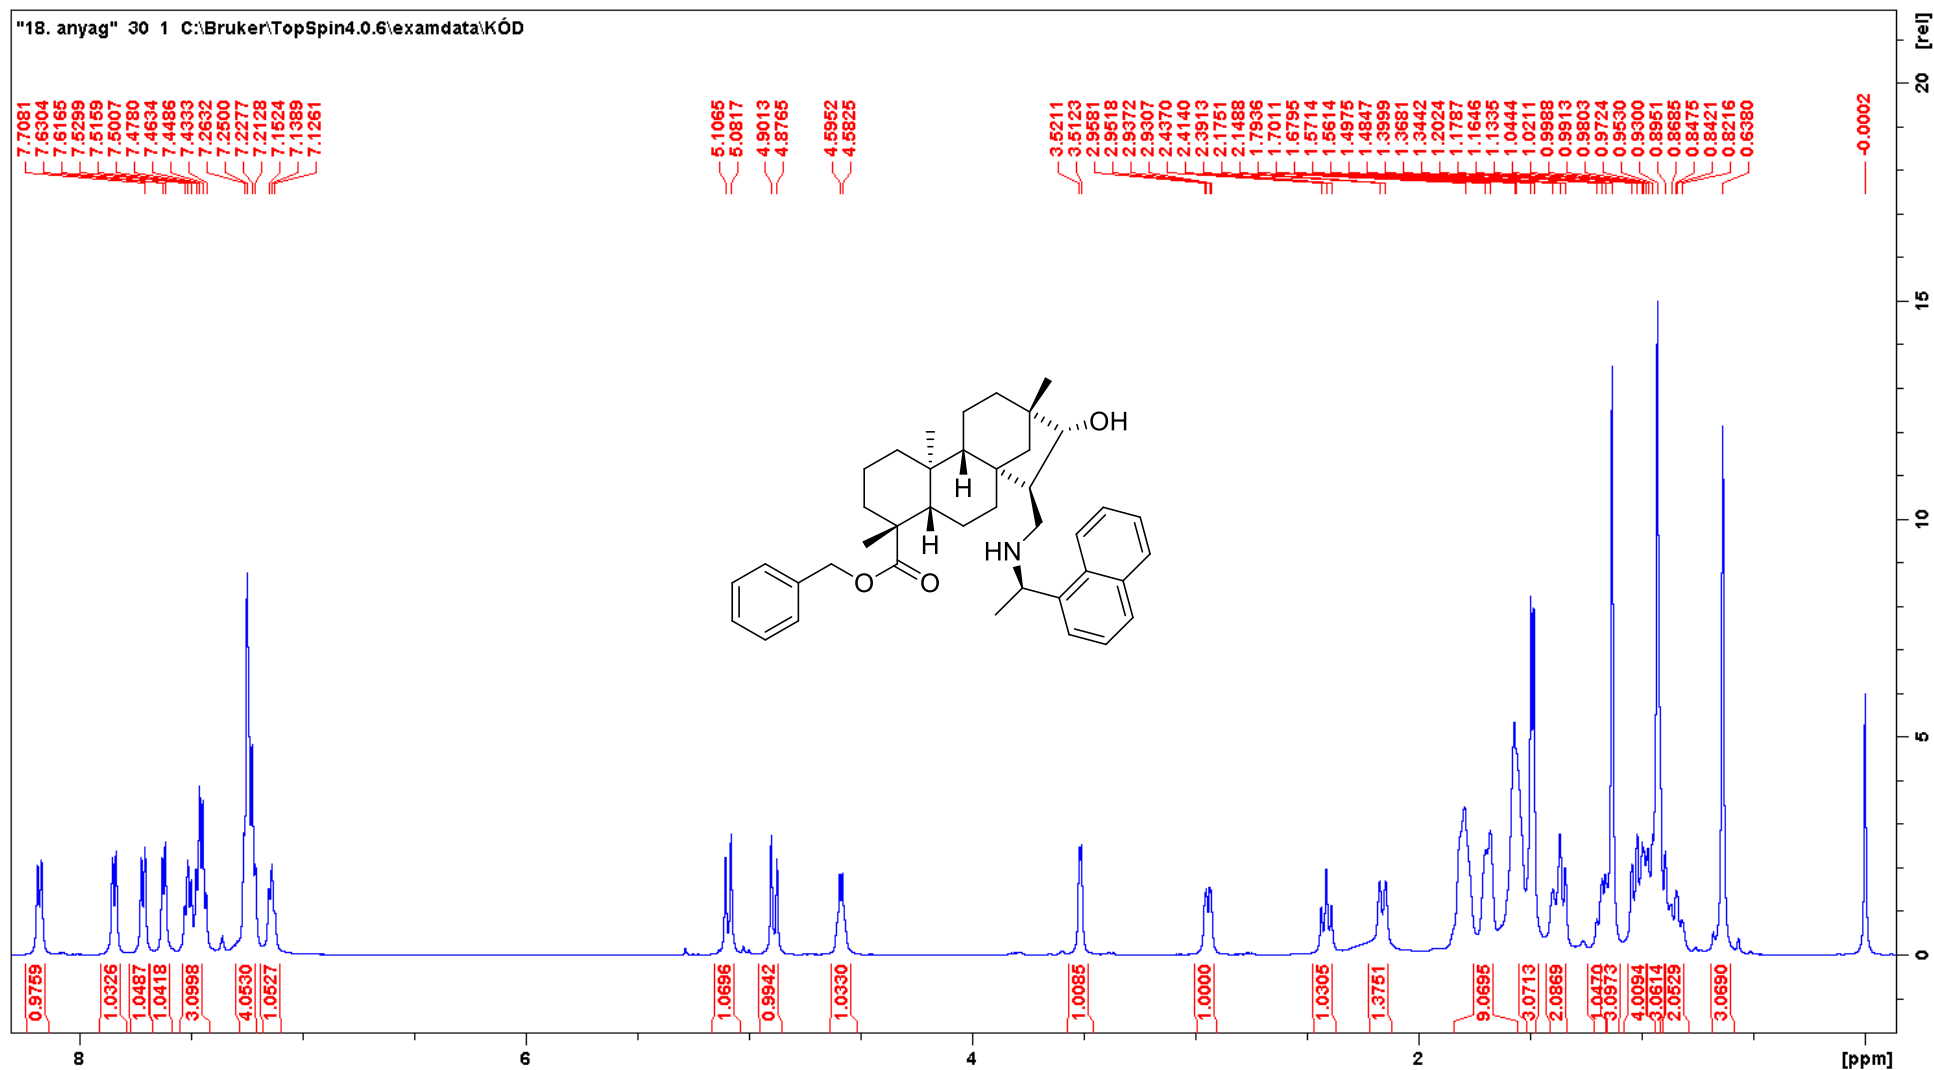



Figure S86

$^{13}\text{C}$ -NMR of compound (4*R*,4*aS*,6*aS*,7*R*,8*R*,9*S*,11*bS*)-Benzyl 8-hydroxy-4,9,11*b*-trimethyl-7-(((*R*)-1-(naphthalen-1-yl)ethyl)amino)methyl)tetradecahydro-6*a*,9-methanocyclohepta[*a*]naphthalene-4-carboxylate (**18**):

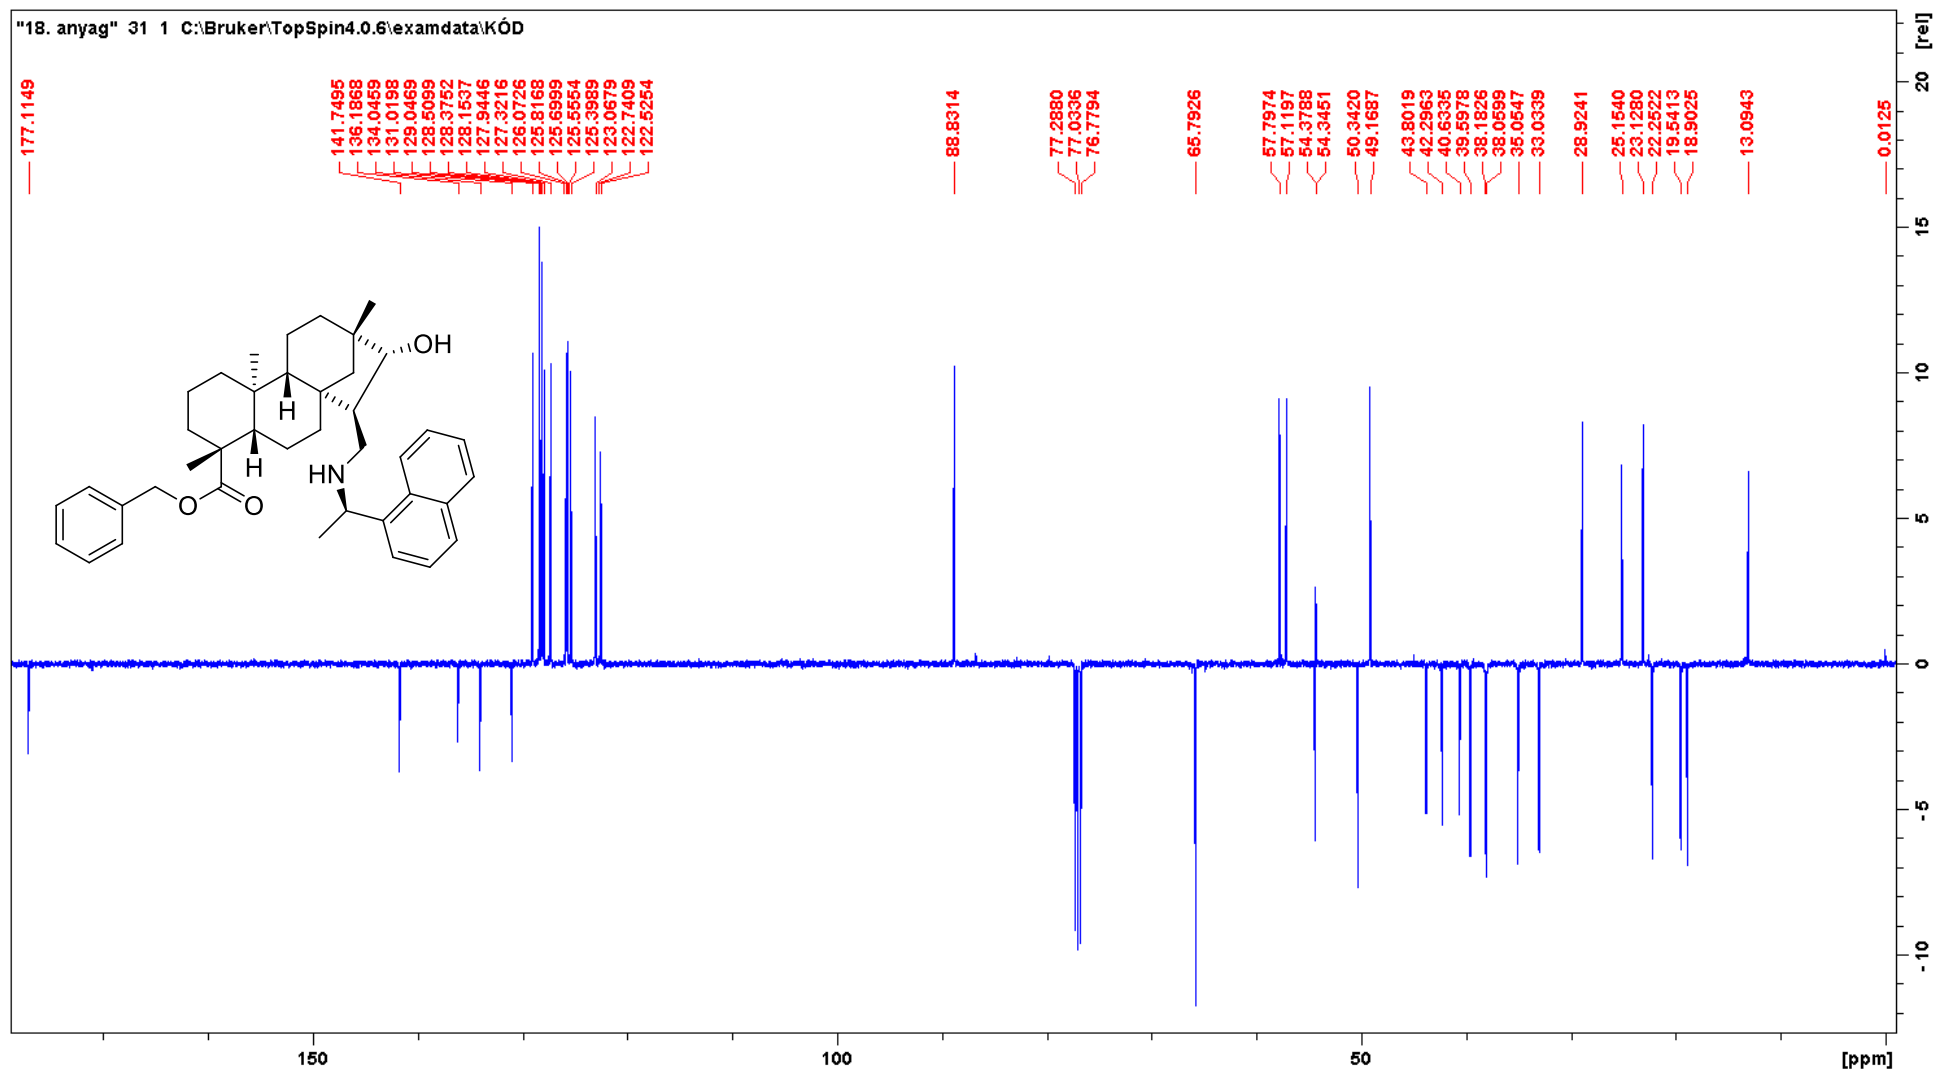

Figure S87

COSY of compound (4*R*,4*aS*,6*aS*,7*R*,8*R*,9*S*,11*bS*)-Benzyl 8-hydroxy-4,9,11*b*-trimethyl-7-(((*R*)-1-(naphthalen-1-yl)ethyl)amino)methyl)tetradecahydro-6*a*,9-methanocyclohepta[*a*]naphthalene-4-carboxylate (**18**):

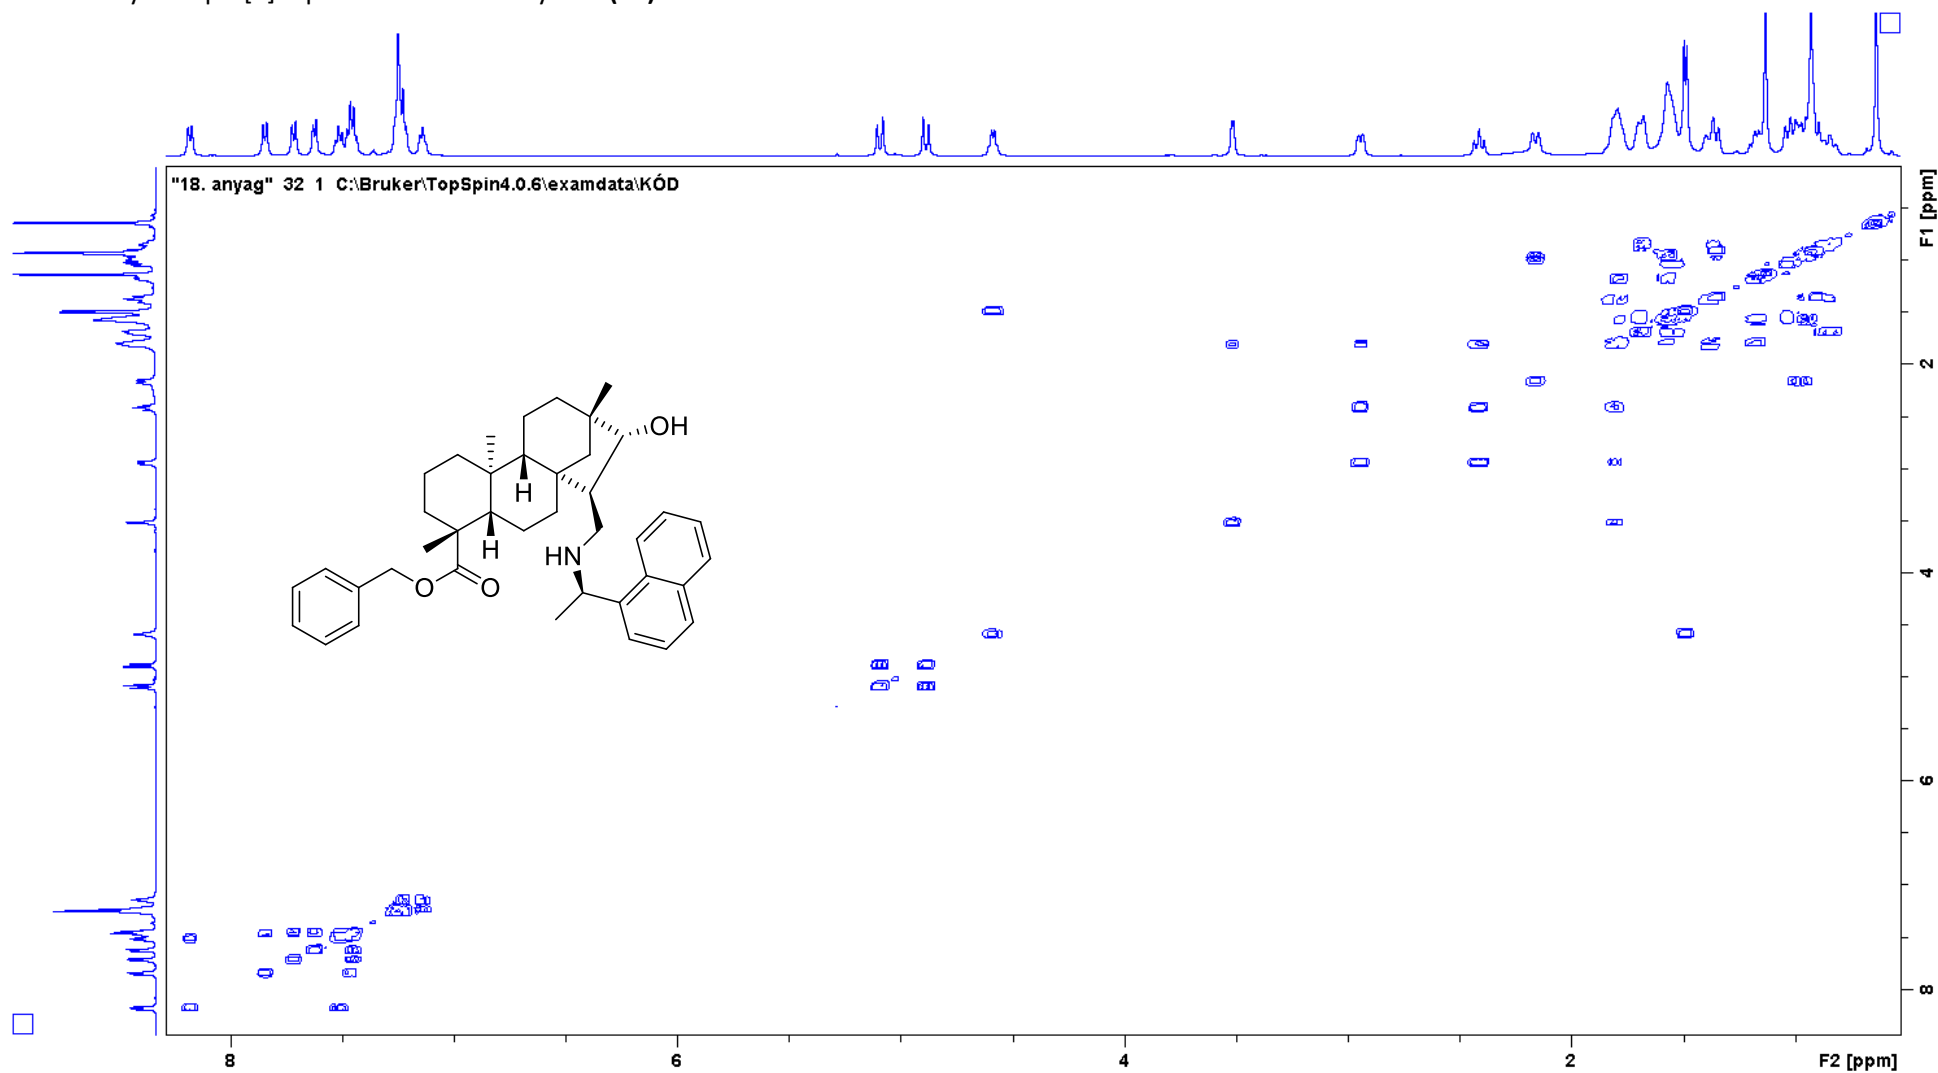

Figure S88

NOESY of compound (4*R*,4*aS*,6*aS*,7*R*,8*R*,9*S*,11*bS*)-Benzyl 8-hydroxy-4,9,11*b*-trimethyl-7-((((*R*)-1-(naphthalen-1-yl)ethyl)amino)methyl)tetradecahydro-6*a*,9-methanocyclohepta[*a*]naphthalene-4-carboxylate (**18**):

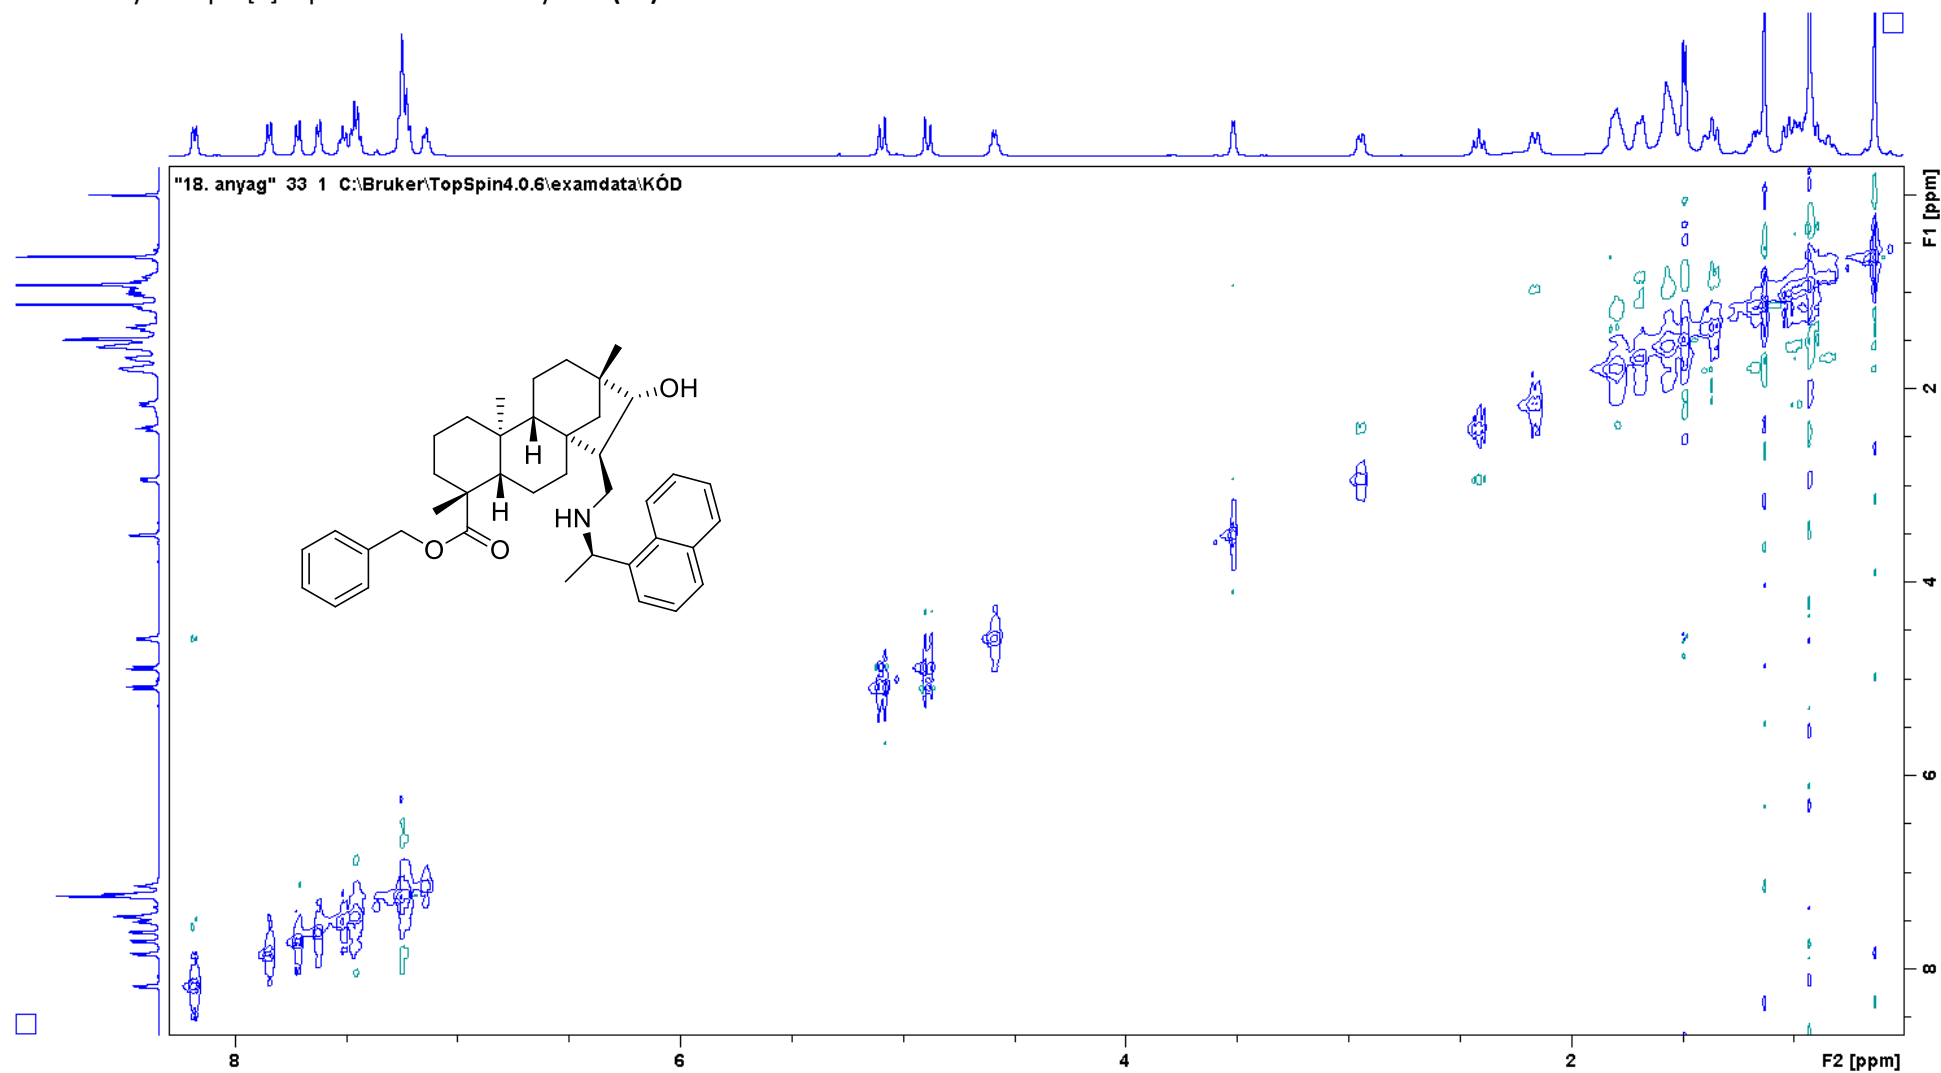

Figure S89

HSQC of compound (4*R*,4*aS*,6*aS*,7*R*,8*R*,9*S*,11*bS*)-Benzyl 8-hydroxy-4,9,11*b*-trimethyl-7-(((*R*)-1-(naphthalen-1-yl)ethyl)amino)methyl)tetradecahydro-6*a*,9-methanocyclohepta[*a*]naphthalene-4-carboxylate (**18**):

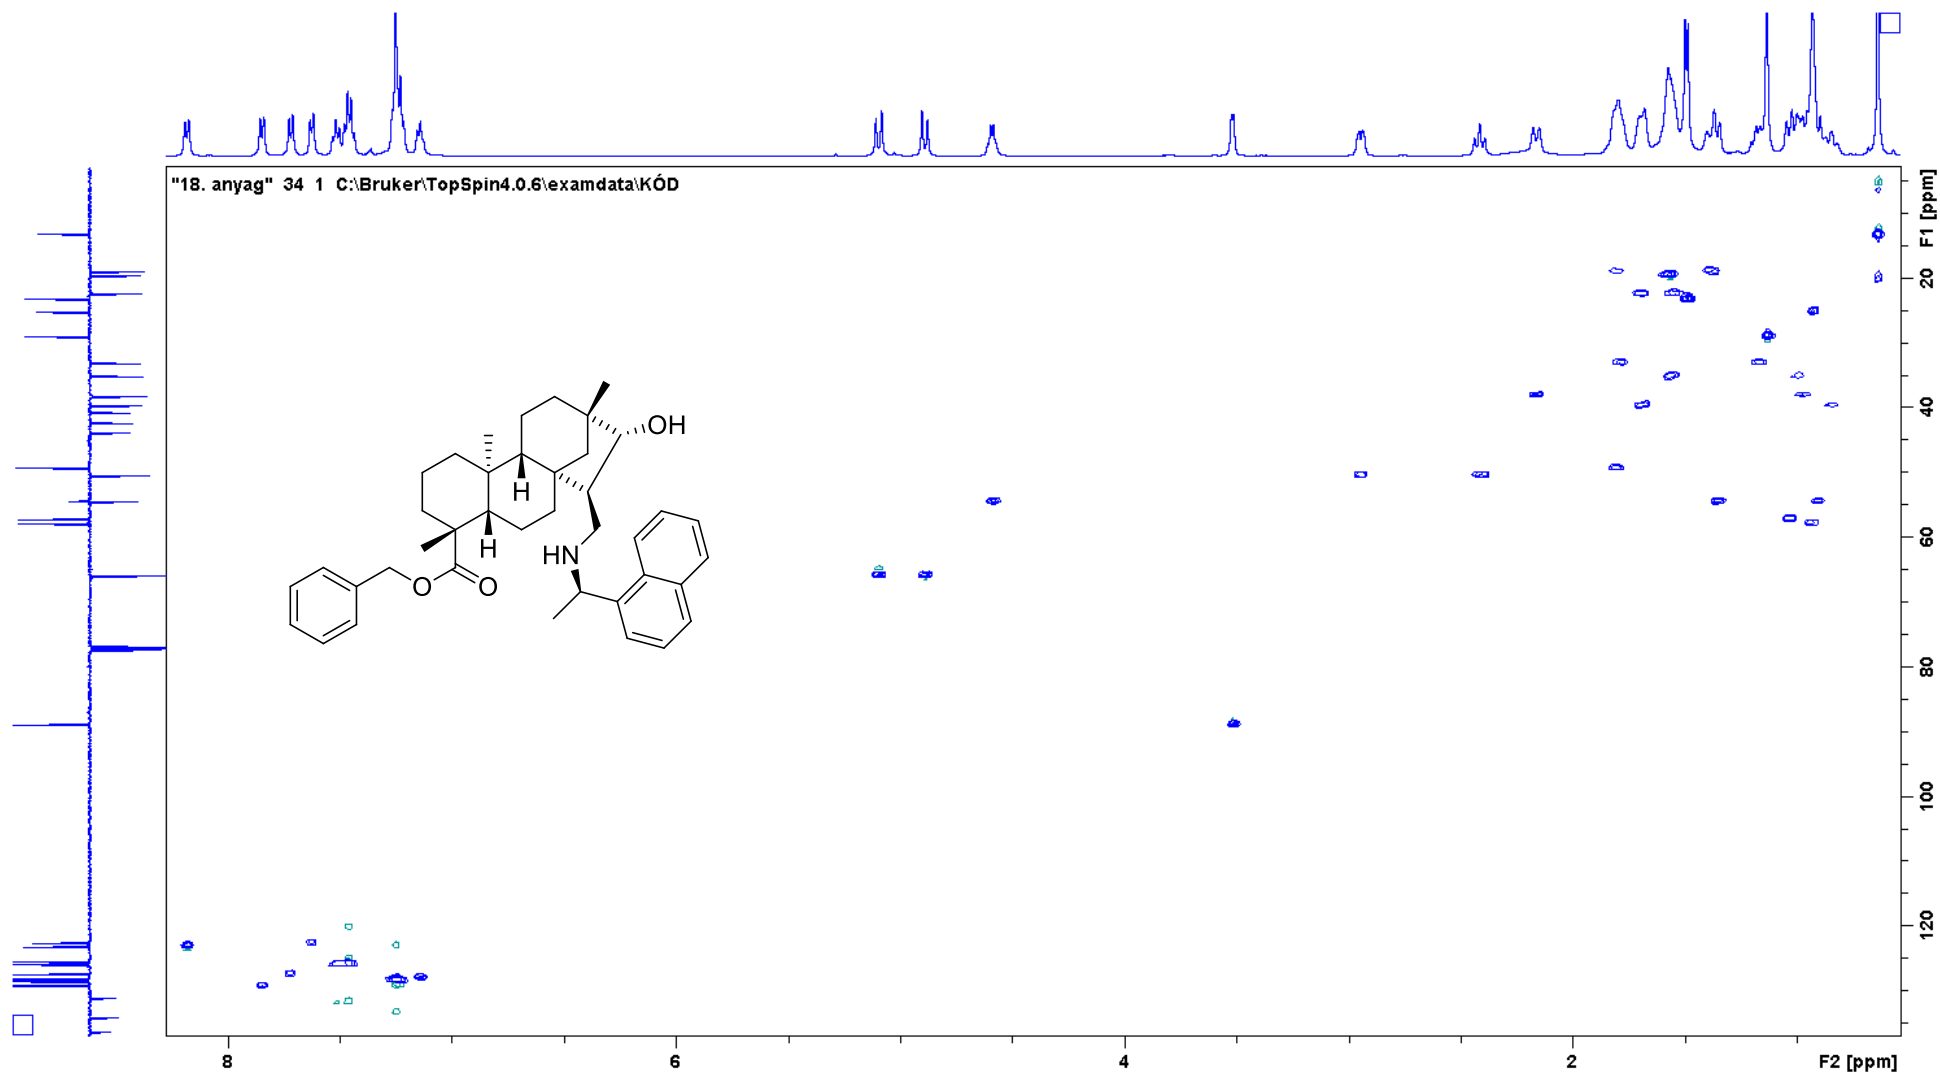

Figure S90

HMBC of compound (4*R*,4*aS*,6*aS*,7*R*,8*R*,9*S*,11*bS*)-Benzyl 8-hydroxy-4,9,11*b*-trimethyl-7-(((*R*)-1-(naphthalen-1-yl)ethyl)amino)methyl)tetradecahydro-6*a*,9-methanocyclohepta[*a*]naphthalene-4-carboxylate (**18**):

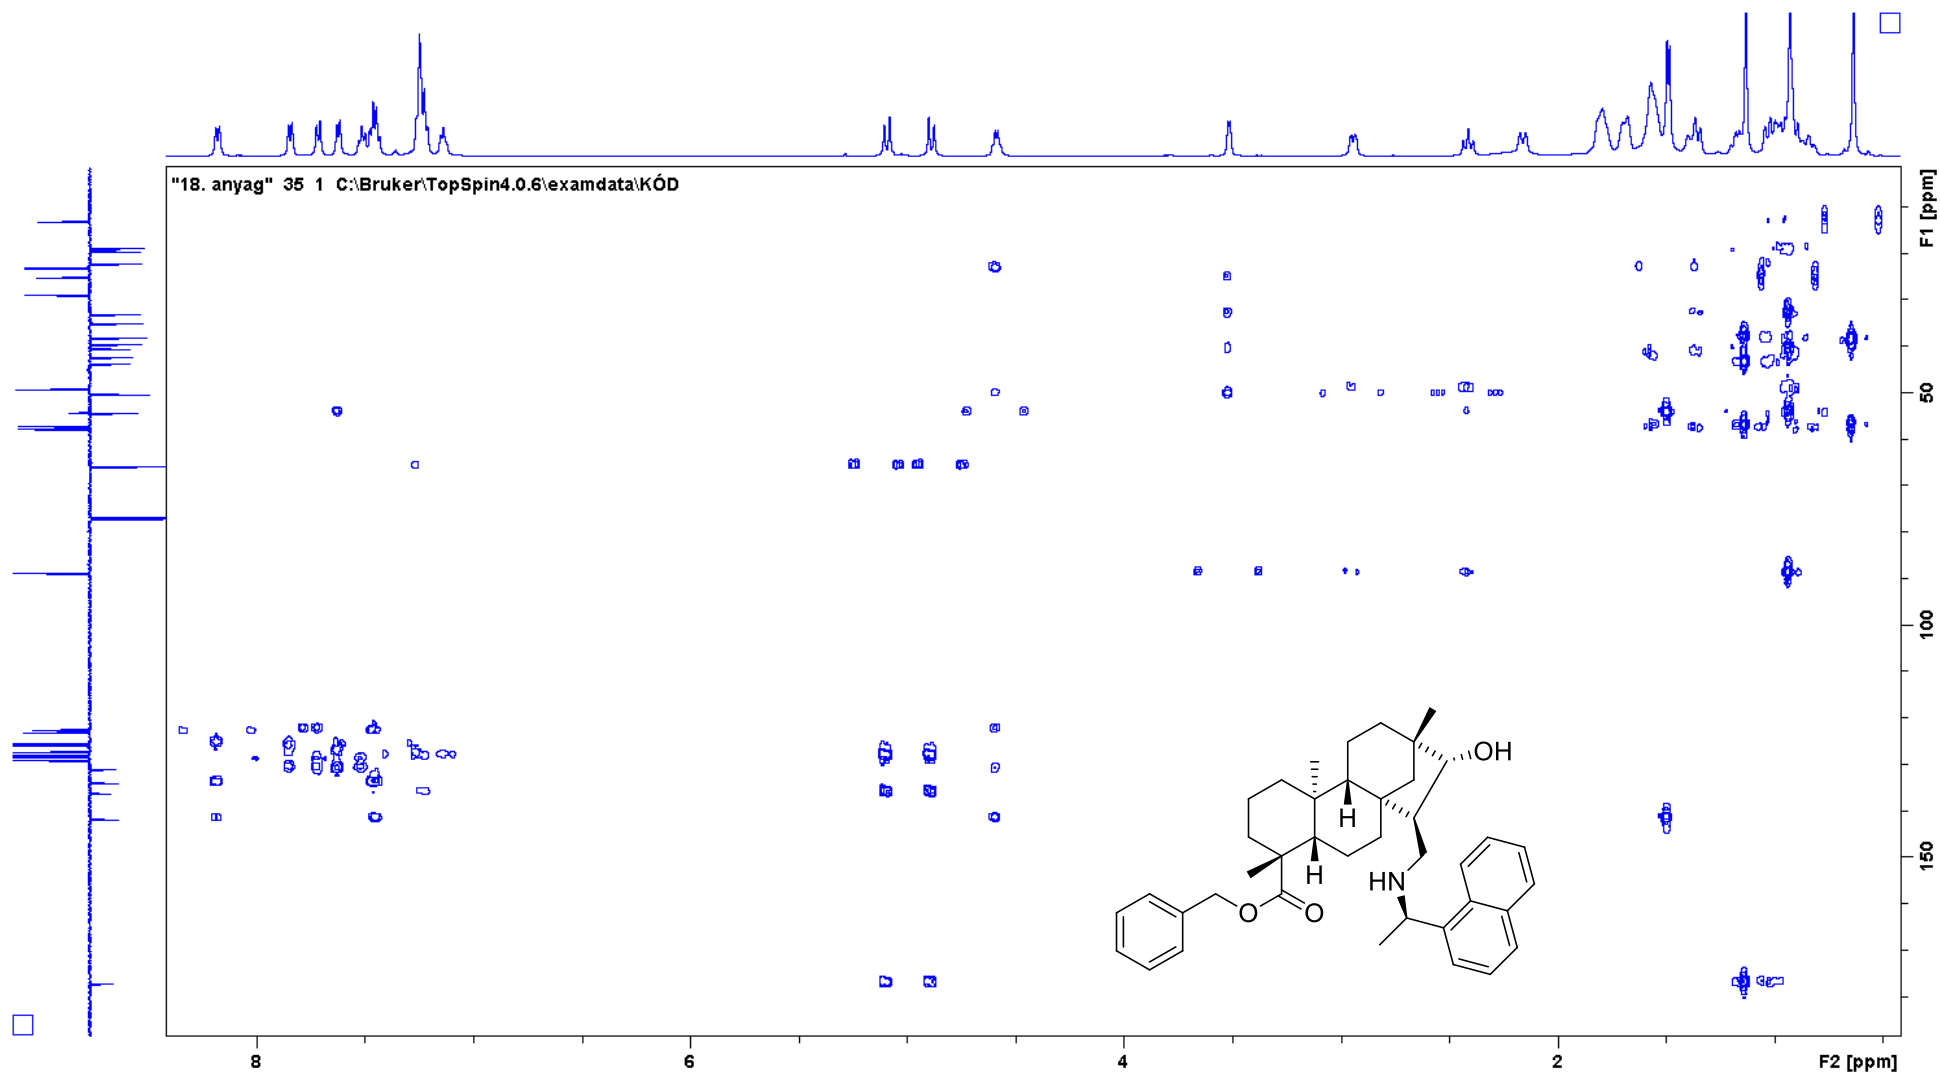

Figure S91

$^1\text{H}$ -NMR of compound (4*R*,4*aS*,6*aS*,7*R*,8*R*,9*S*,11*bS*)-Benzyl 8-hydroxy-4,9,11*b*-trimethyl-7-(((*S*)-1-(naphthalen-1-yl)ethyl)amino)methyl)tetradeca hydro-6*a*,9-methanocyclohepta[*a*]naphthalene-4-carboxylate (**19**):

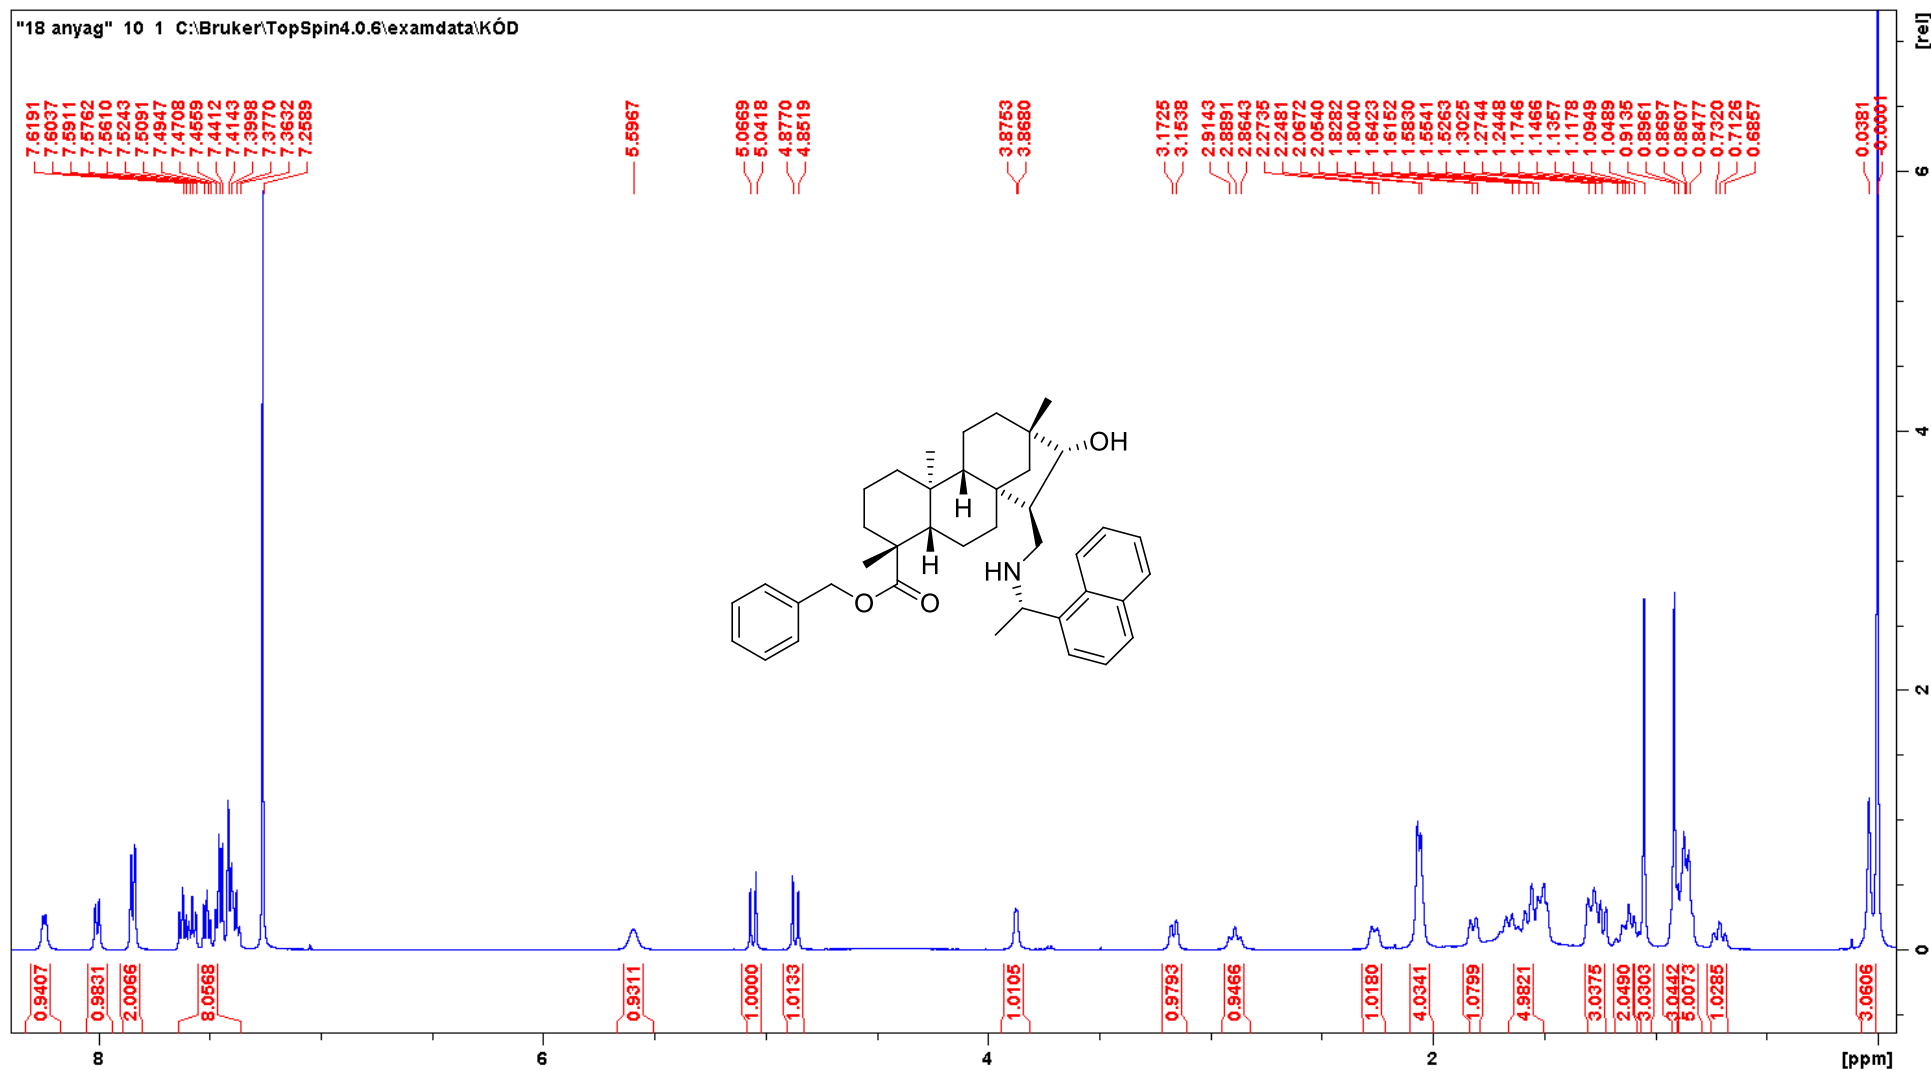

Figure S92

$^{13}\text{C}$ -NMR of compound (4*R*,4*aS*,6*aS*,7*R*,8*R*,9*S*,11*bS*)-Benzyl 8-hydroxy-4,9,11*b*-trimethyl-7-(((*S*)-1-(naphthalen-1-yl)ethyl)amino)methyl)tetra decahydro-6*a*,9-methanocyclohepta[*a*]naphthalene-4-carboxylate (**19**):

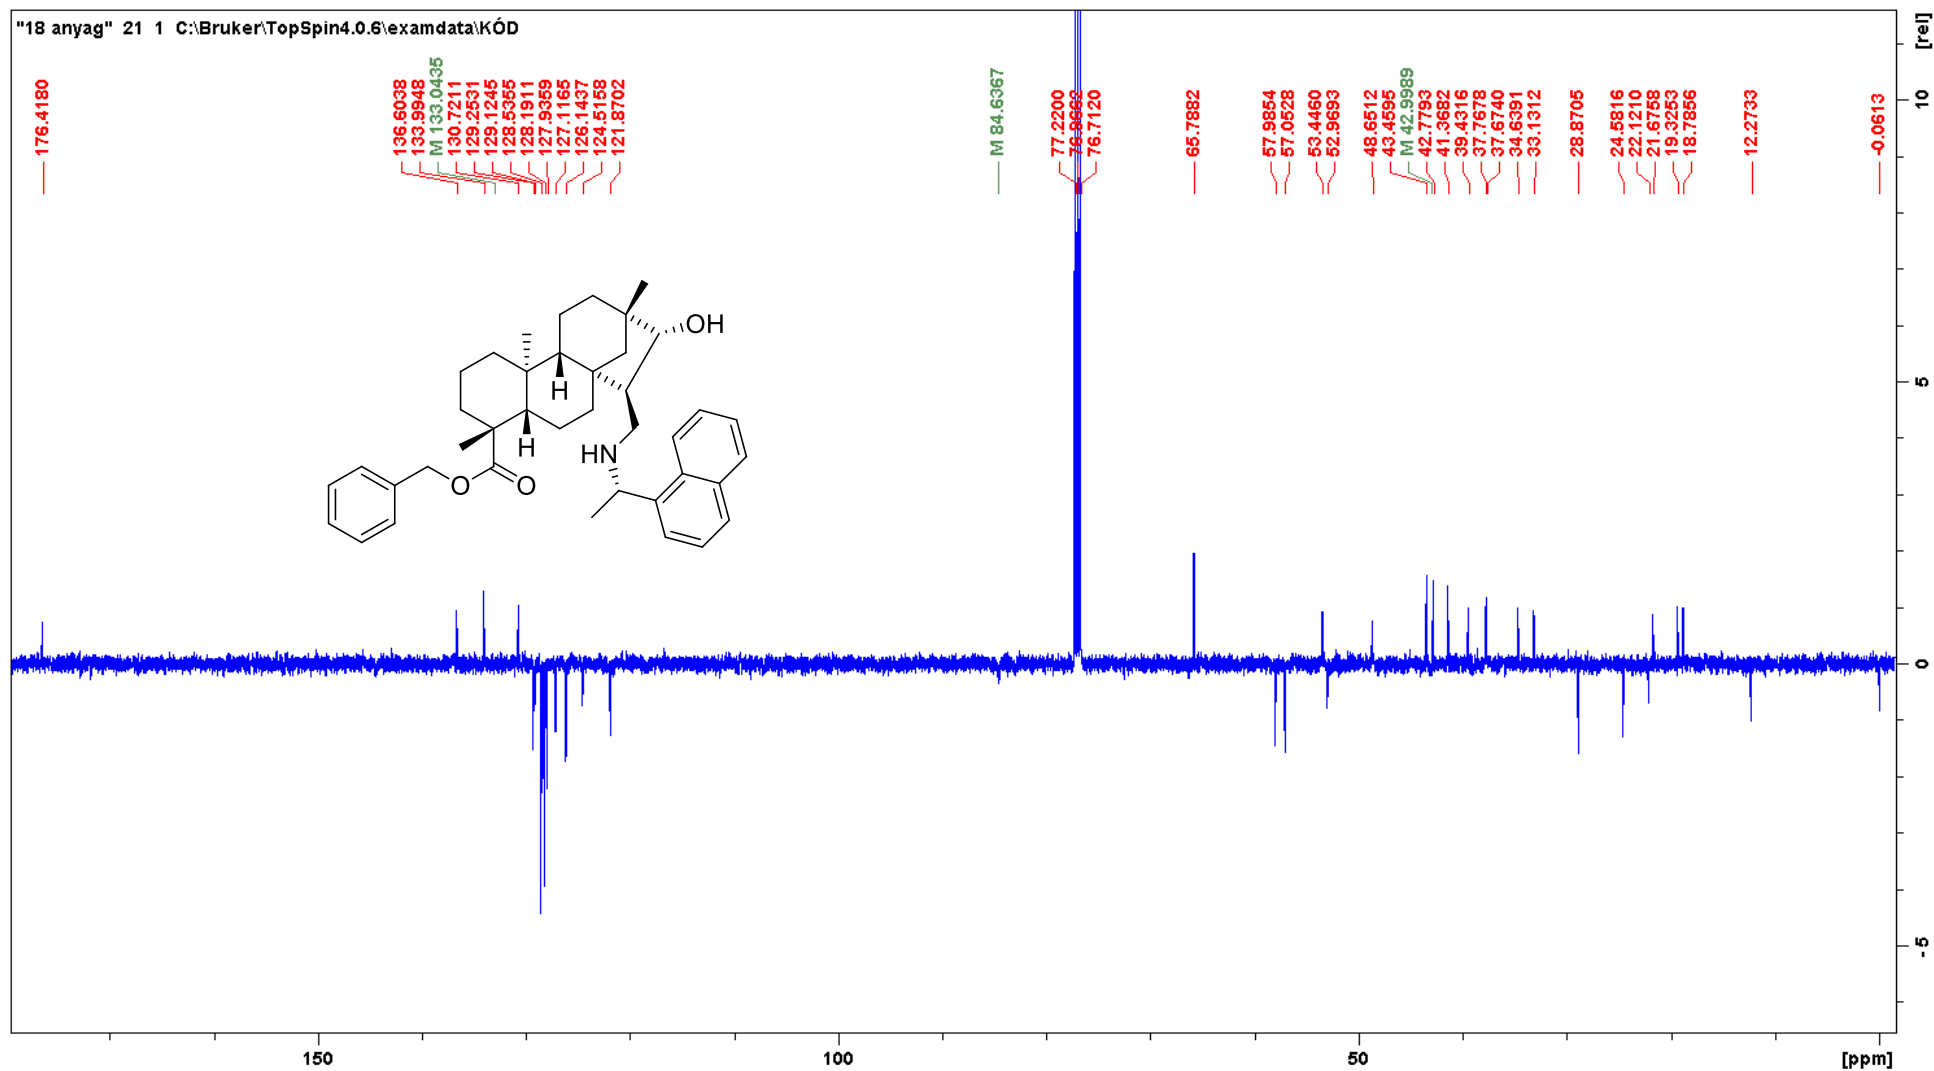

Figure S93

COSY of compound (4*R*,4*aS*,6*aS*,7*R*,8*R*,9*S*,11*bS*)-Benzyl 8-hydroxy-4,9,11*b*-trimethyl-7-(((*S*)-1-(naphthalen-1-yl)ethyl)amino)methyl)tetradecahydro-6*a*,9-methanocyclohepta[*a*]naphthalene-4-carboxylate (**19**):

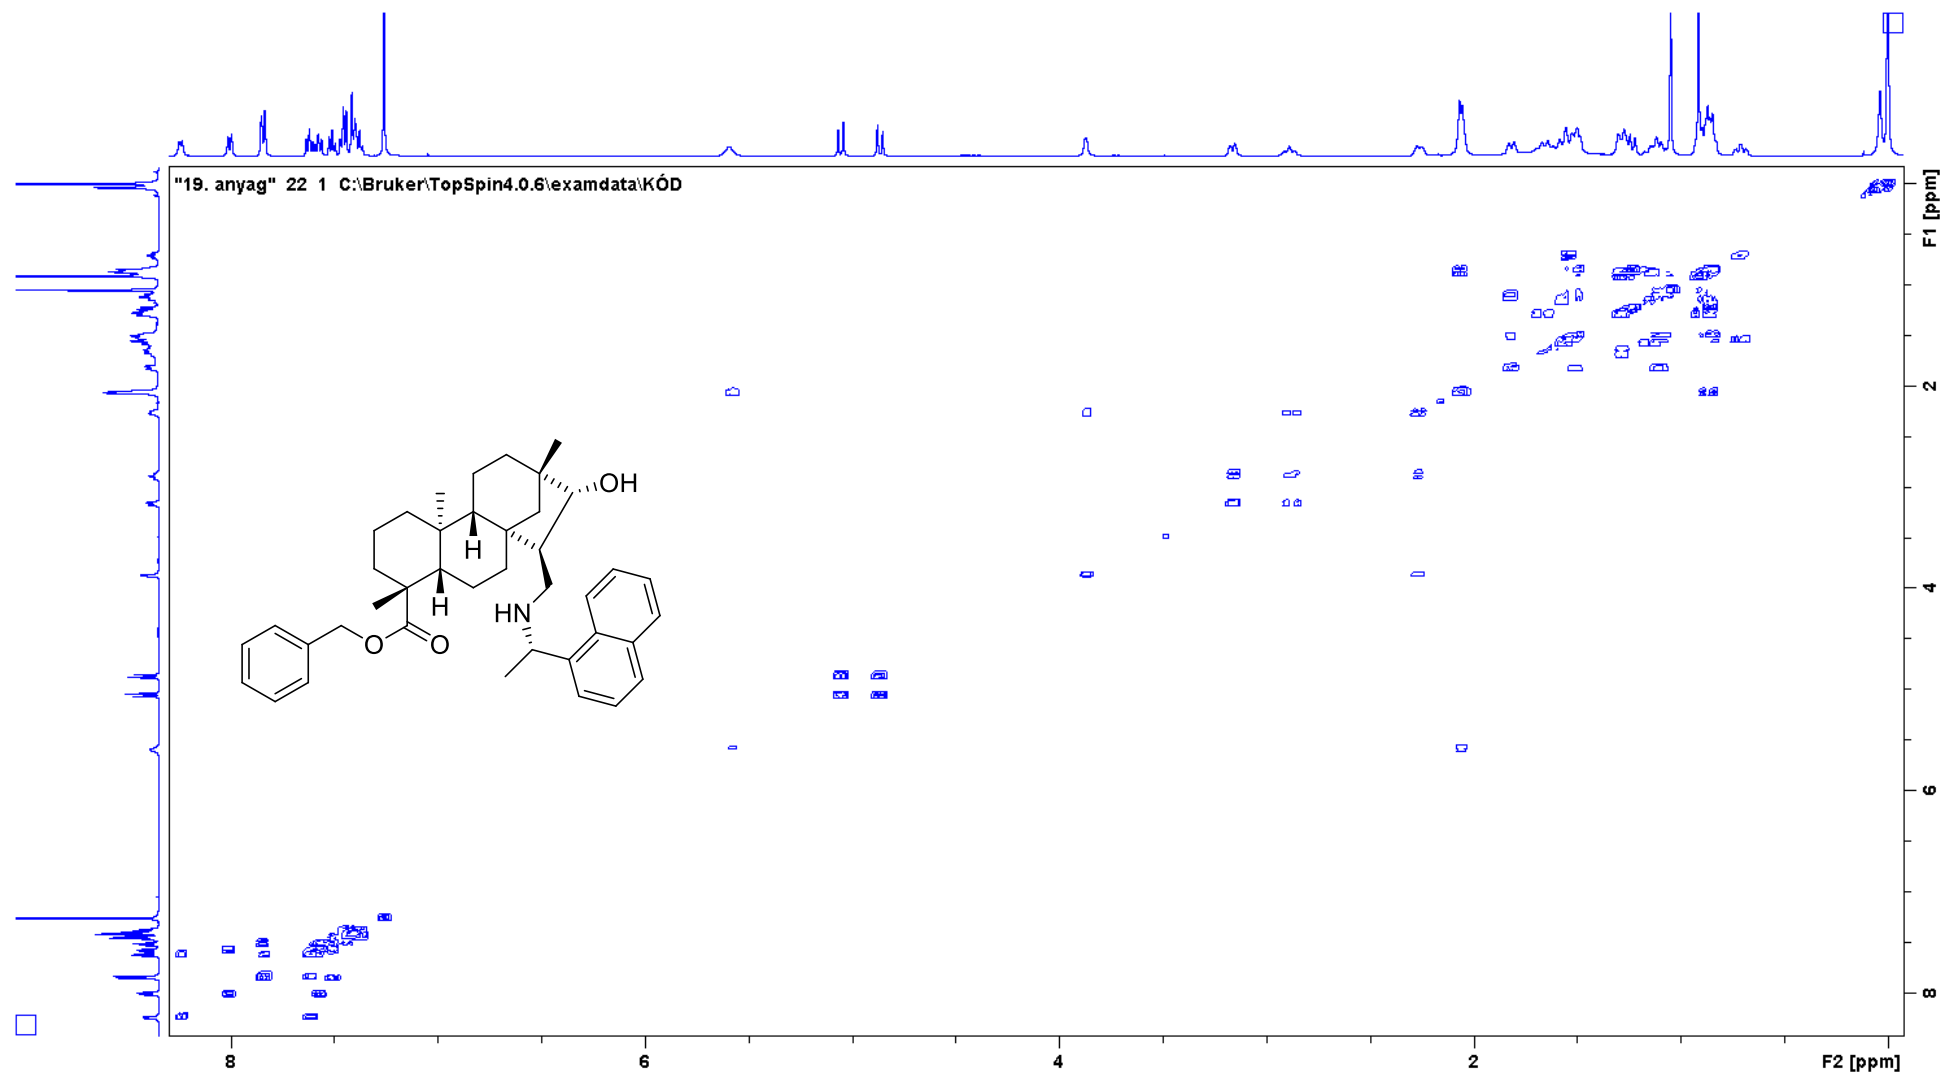



Figure S94

NOESY of compound (4*R*,4*aS*,6*aS*,7*R*,8*R*,9*S*,11*bS*)-Benzyl 8-hydroxy-4,9,11*b*-trimethyl-7-(((*S*)-1-(naphthalen-1-yl)ethyl)amino)methyl)tetradecahydro-6*a*,9-methanocyclohepta[*a*]naphthalene-4-carboxylate (**19**):

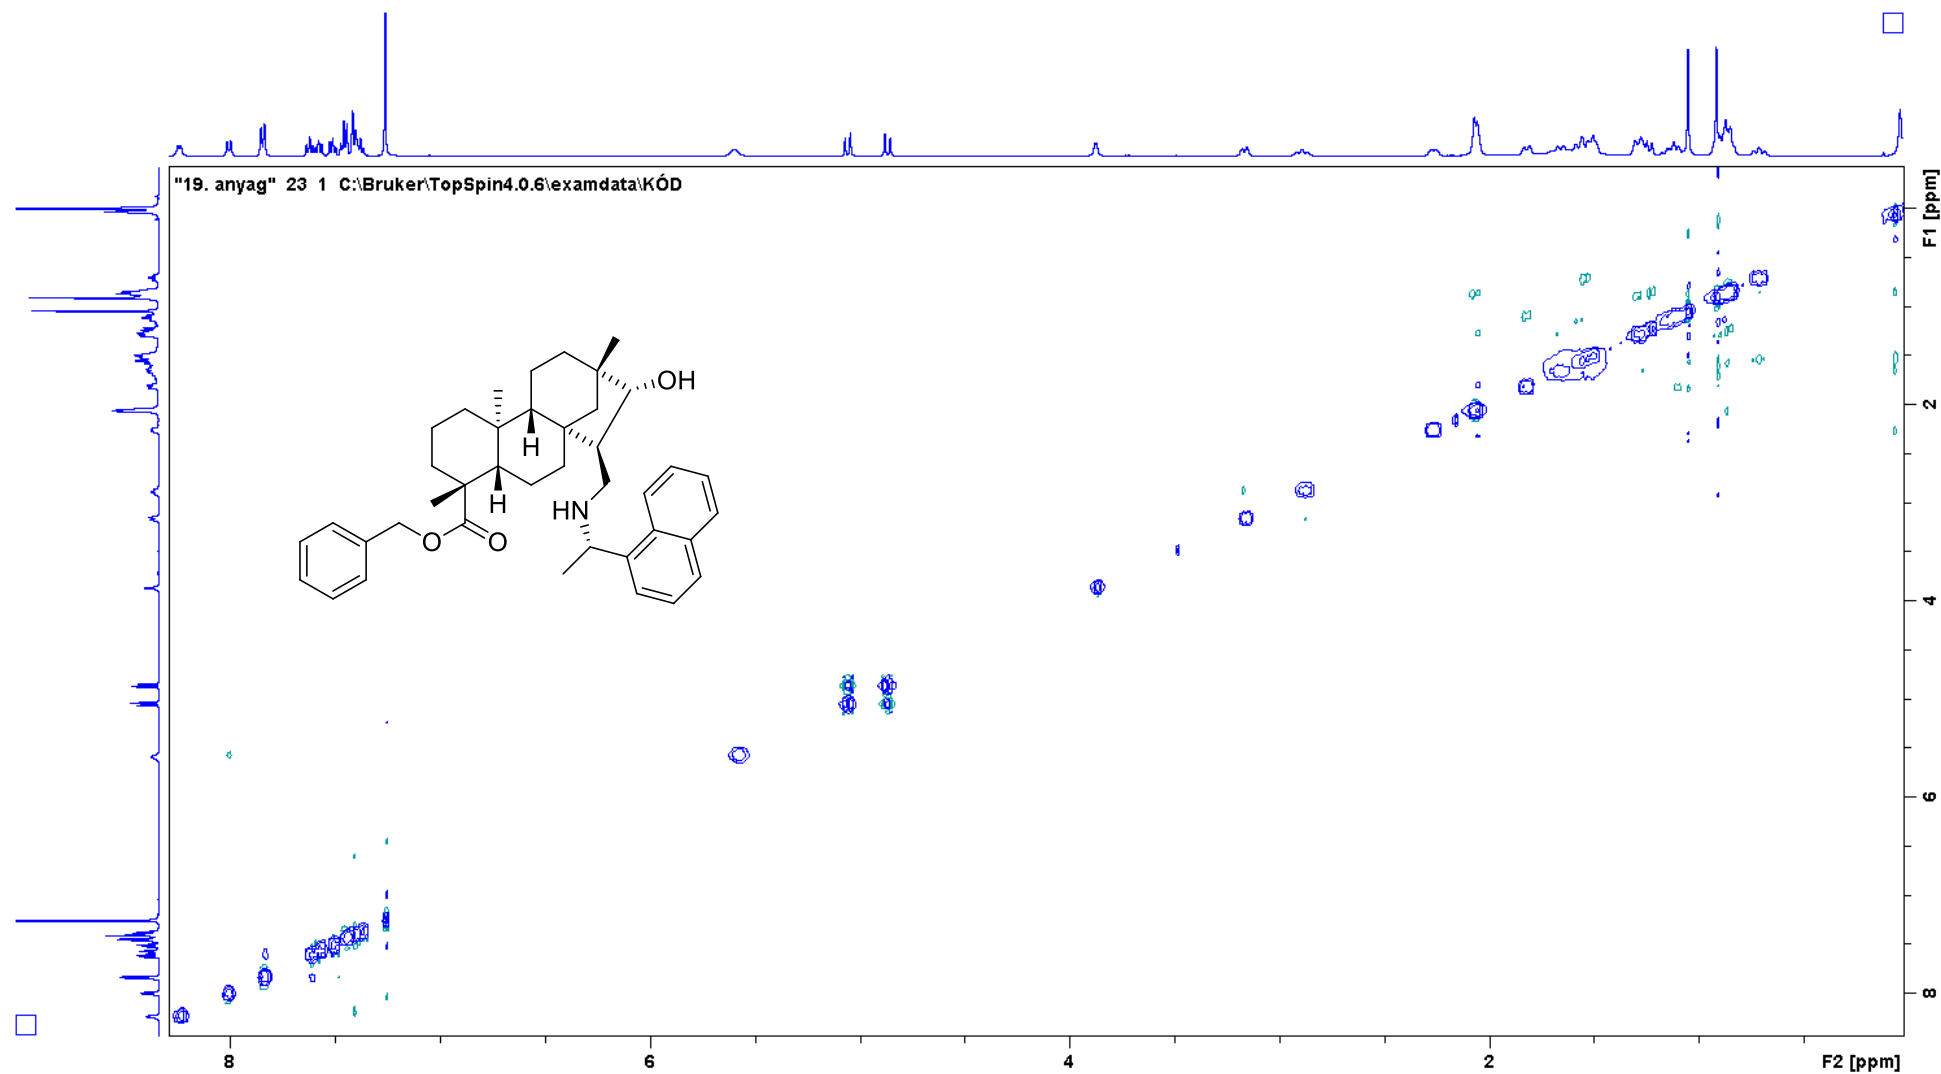

Figure S95

HSQC of compound (4*R*,4*aS*,6*aS*,7*R*,8*R*,9*S*,11*bS*)-Benzyl 8-hydroxy-4,9,11*b*-trimethyl-7-(((*S*)-1-(naphthalen-1-yl)ethyl)amino)methyl)tetradecahydro-6*a*,9-methanocyclohepta[*a*]naphthalene-4-carboxylate (**19**):

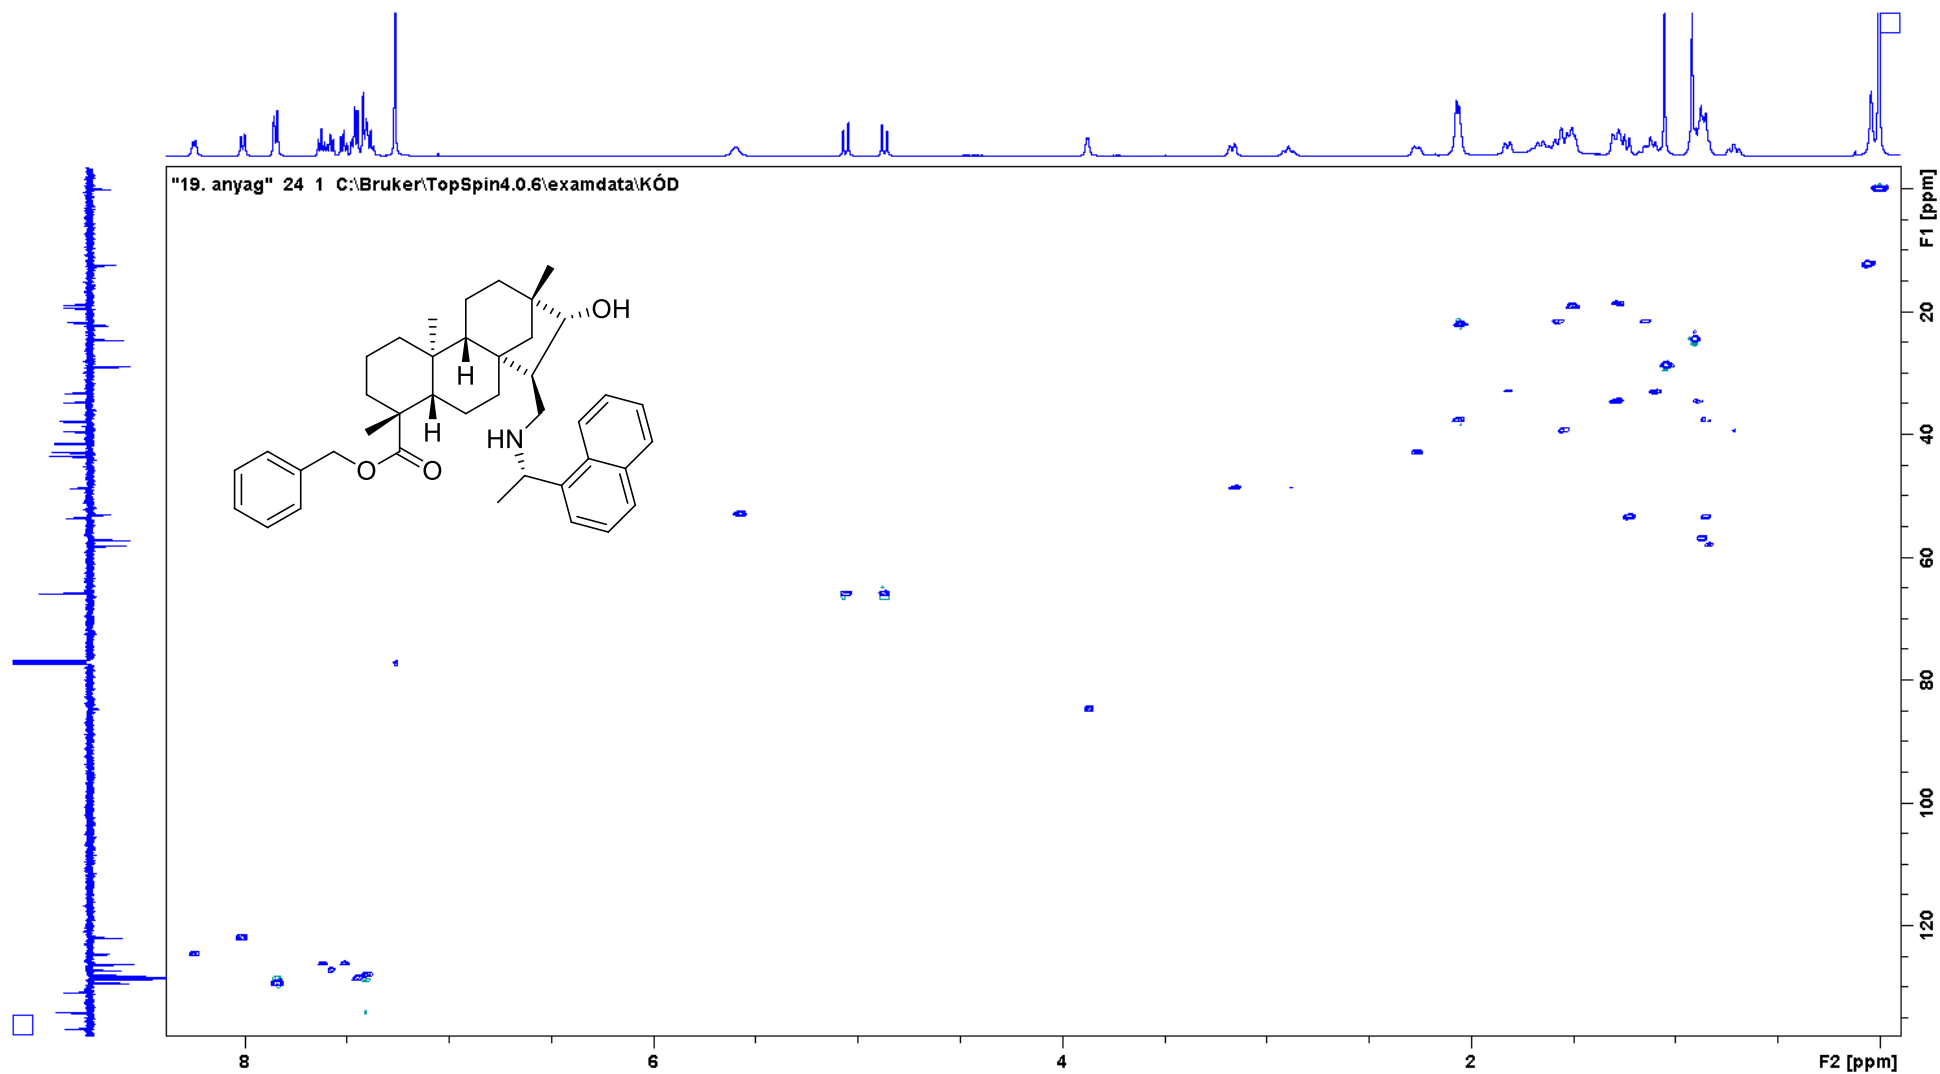

Figure S96

HMBC of compound (4*R*,4*aS*,6*aS*,7*R*,8*R*,9*S*,11*bS*)-Benzyl 8-hydroxy-4,9,11*b*-trimethyl-7-(((*S*)-1-(naphthalen-1-yl)ethyl)amino)methyl)tetra decahydro-6*a*,9-methanocyclohepta[*a*]naphthalene-4-carboxylate (**19**):

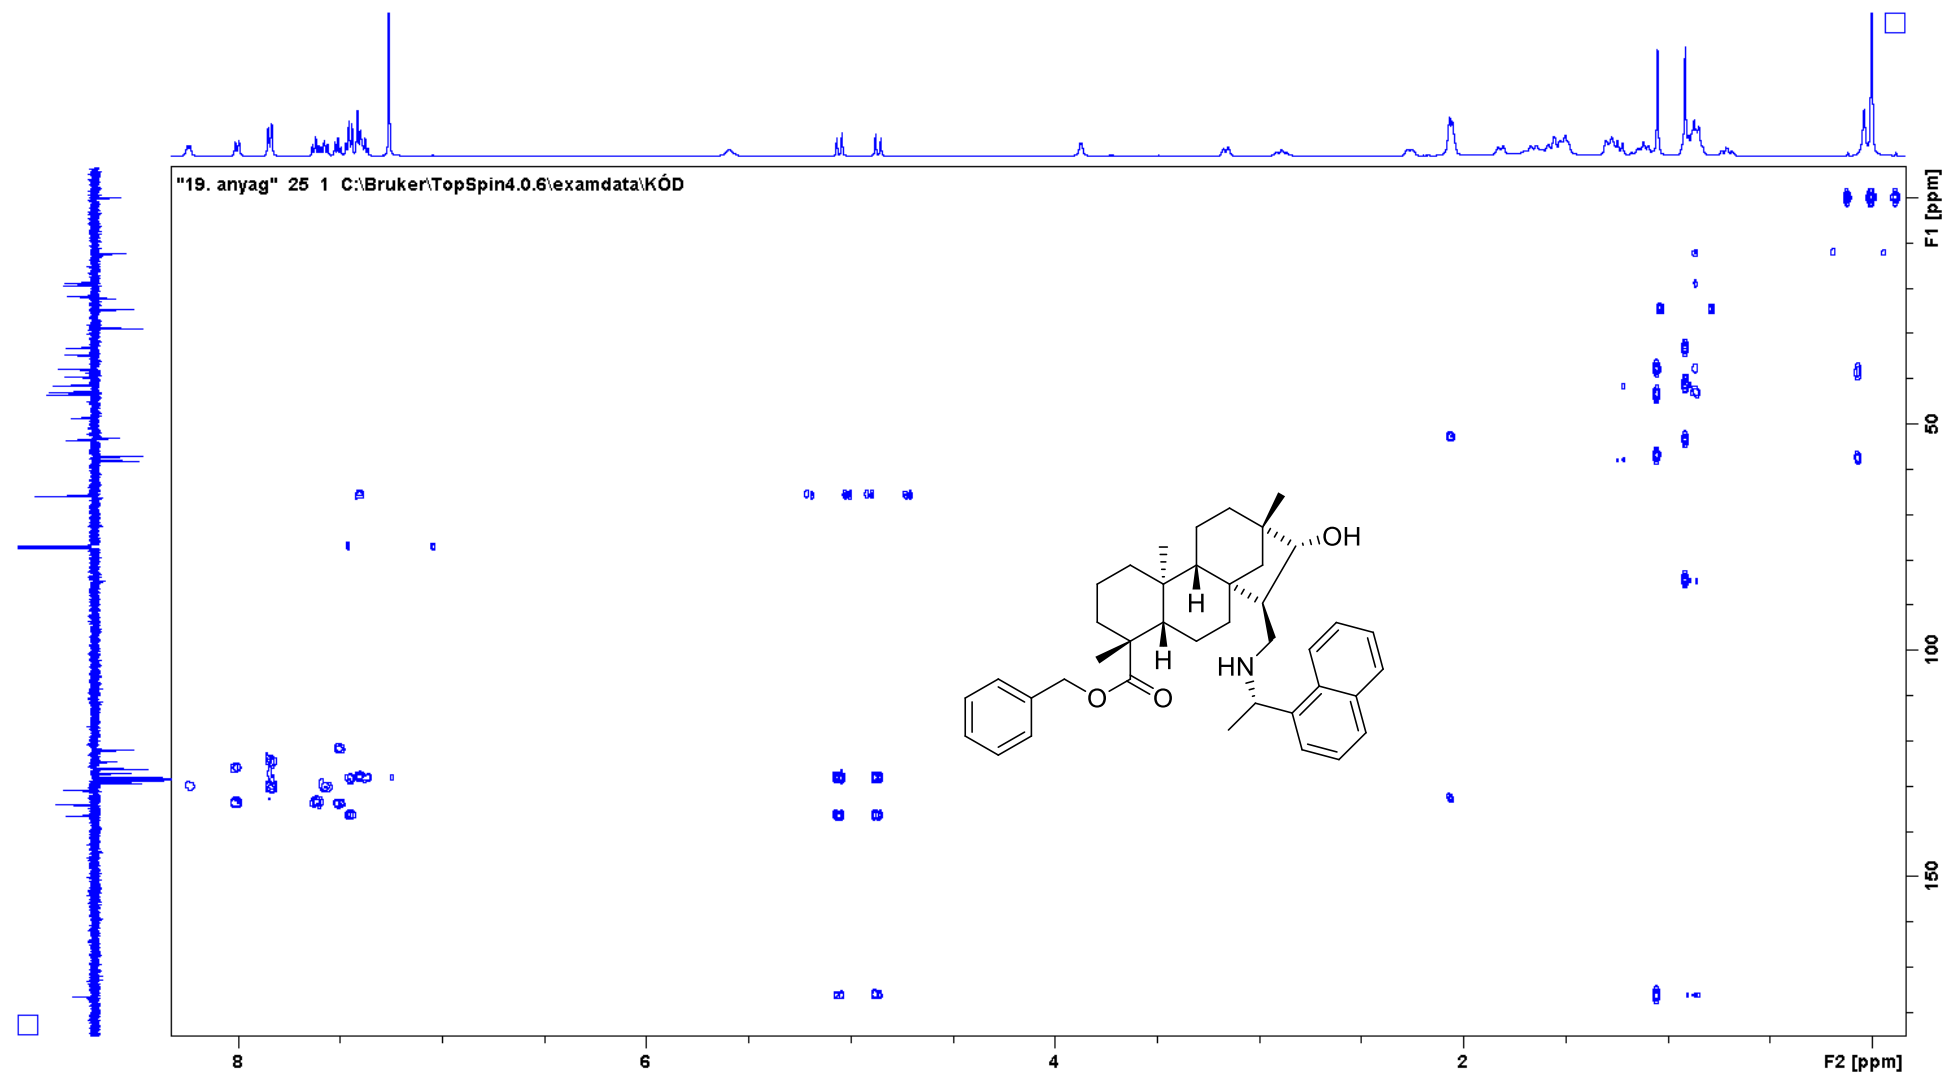

Figure S97

<sup>1</sup>H-NMR of compound (4*R*,4*a**S*,7*R*,8*R*,11*b**S*)-Benzyl 7-(((3-(1*H*-imidazol-1-yl)propyl)amino)methyl)-8-hydroxy-4,9,11*b*-trimethyltetradeca-hydro-6*a*,9-methanocyclohepta[*a*]naphthalene-4-carboxylate (**20**):

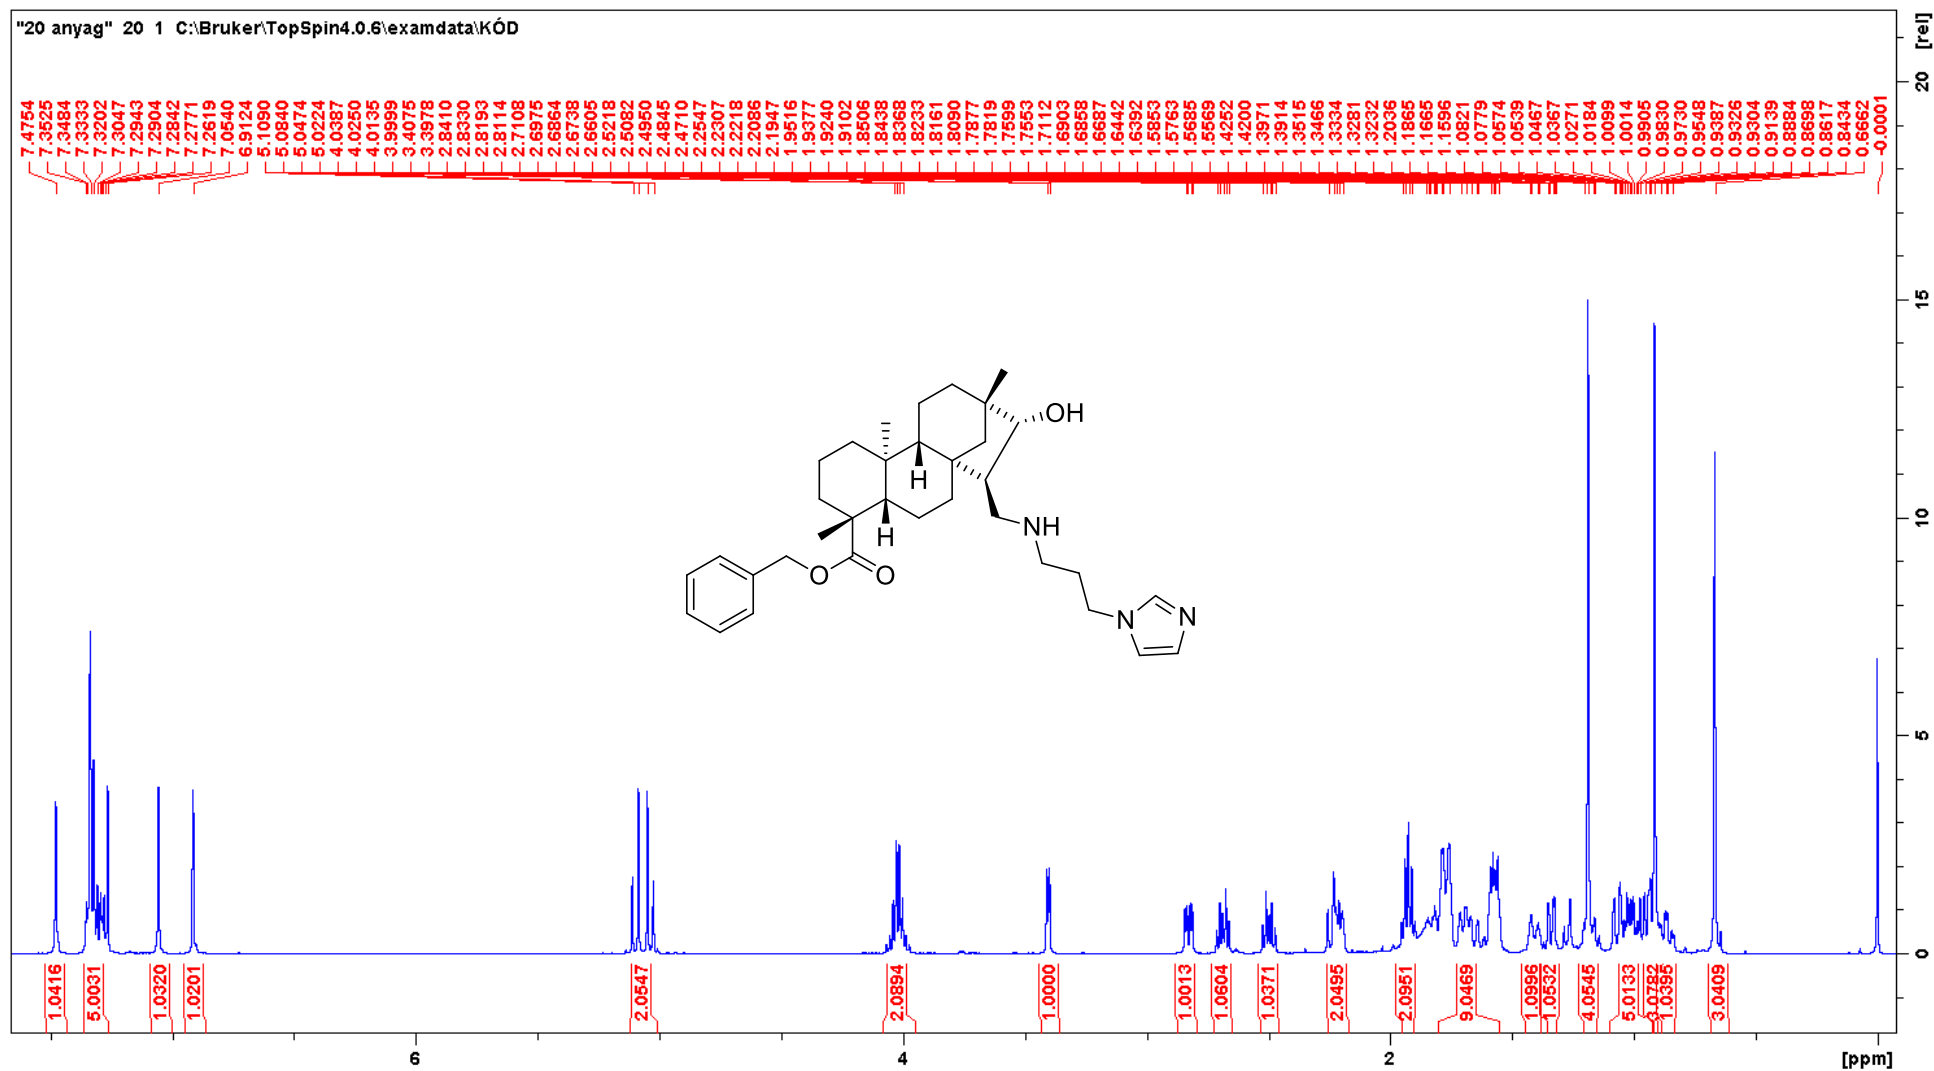

Figure S98

$^{13}\text{C}$ -NMR of compound (4*R*,4*aS*,7*R*,8*R*,11*bS*)-Benzyl 7-(((3-(1*H*-imidazol-1-yl)propyl)amino)methyl)-8-hydroxy-4,9,11*b*-trimethyltetra decahydro-6*a*,9-methanocyclohepta[*a*]naphthalene-4-carboxylate (**20**):

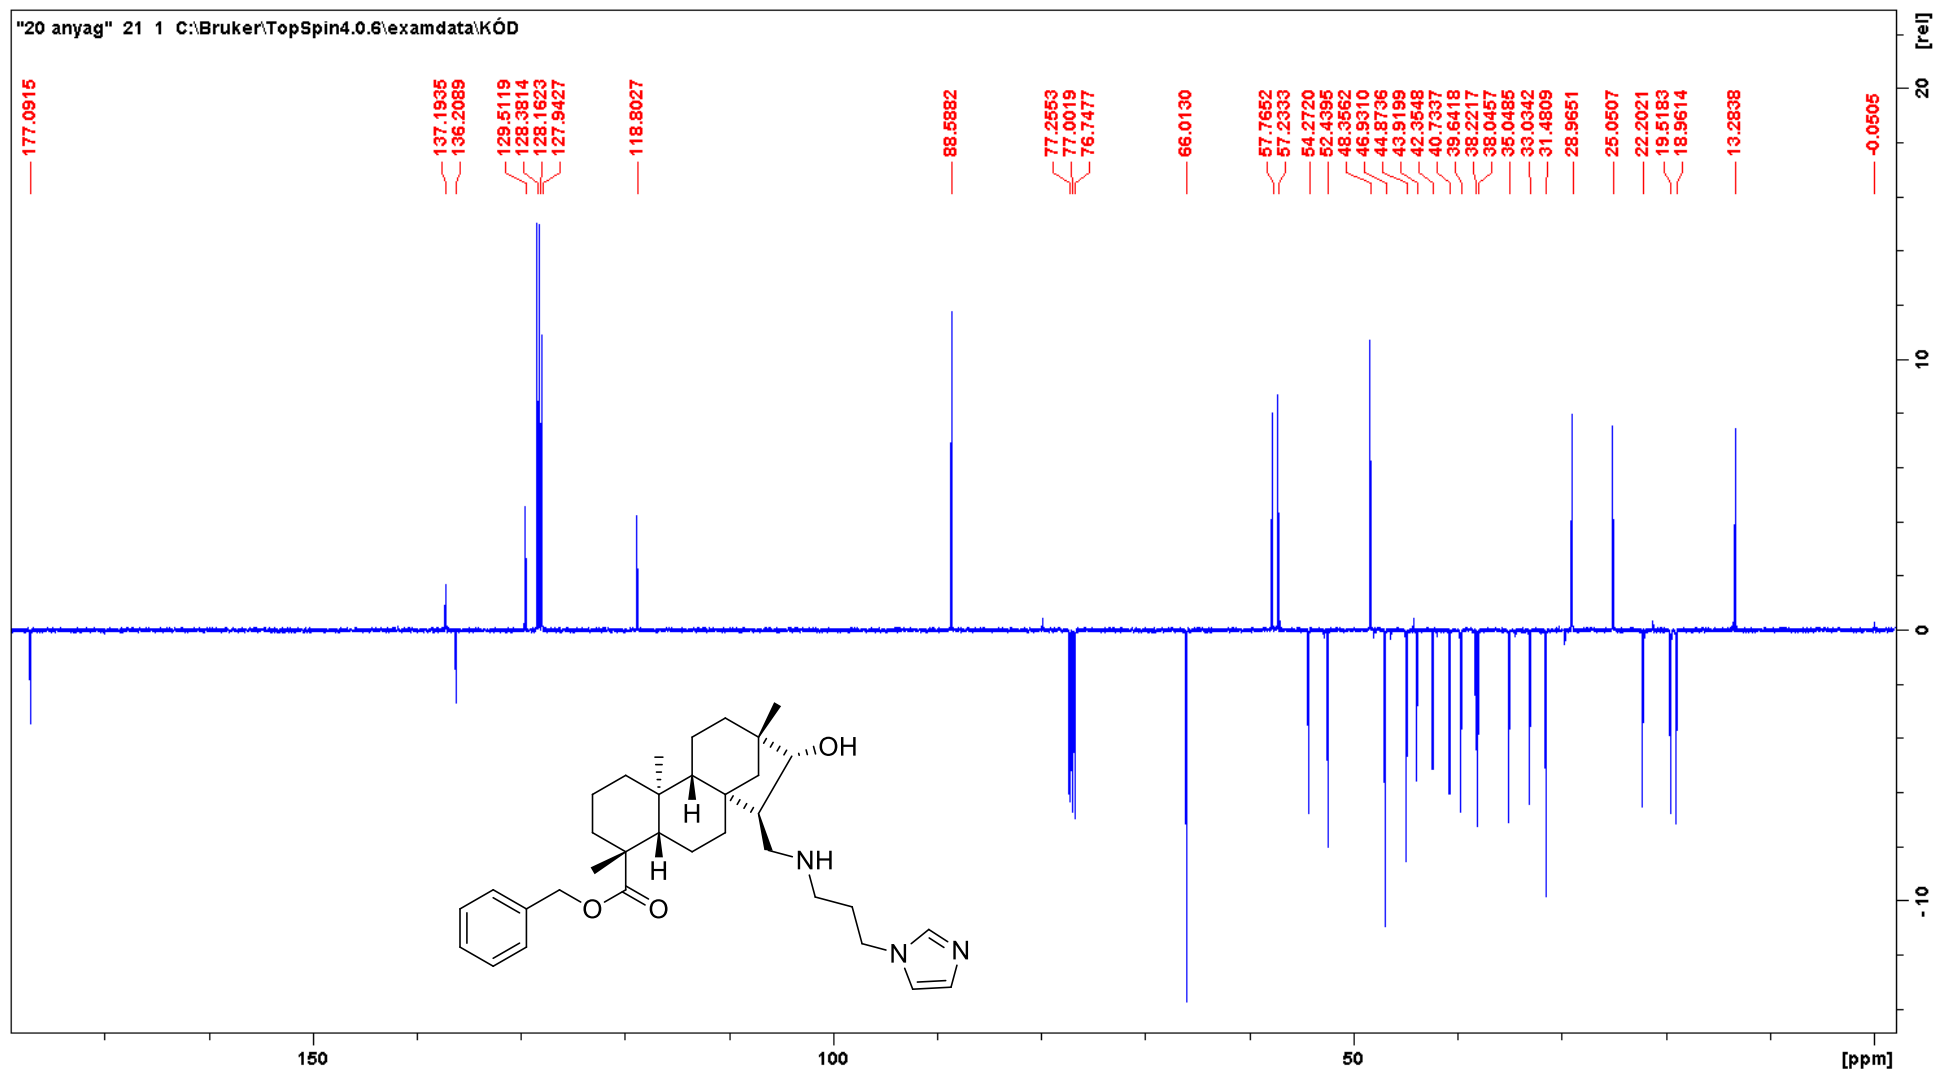

Figure S99

COSY of compound (4*R*,4*aS*,7*R*,8*R*,11*bS*)-Benzyl 7-(((3-(1*H*-imidazol-1-yl)propyl)amino)methyl)-8-hydroxy-4,9,11*b*-trimethyltetradecahydro-6*a*,9-methanocyclohepta[*a*]naphthalene-4-carboxylate (**20**):

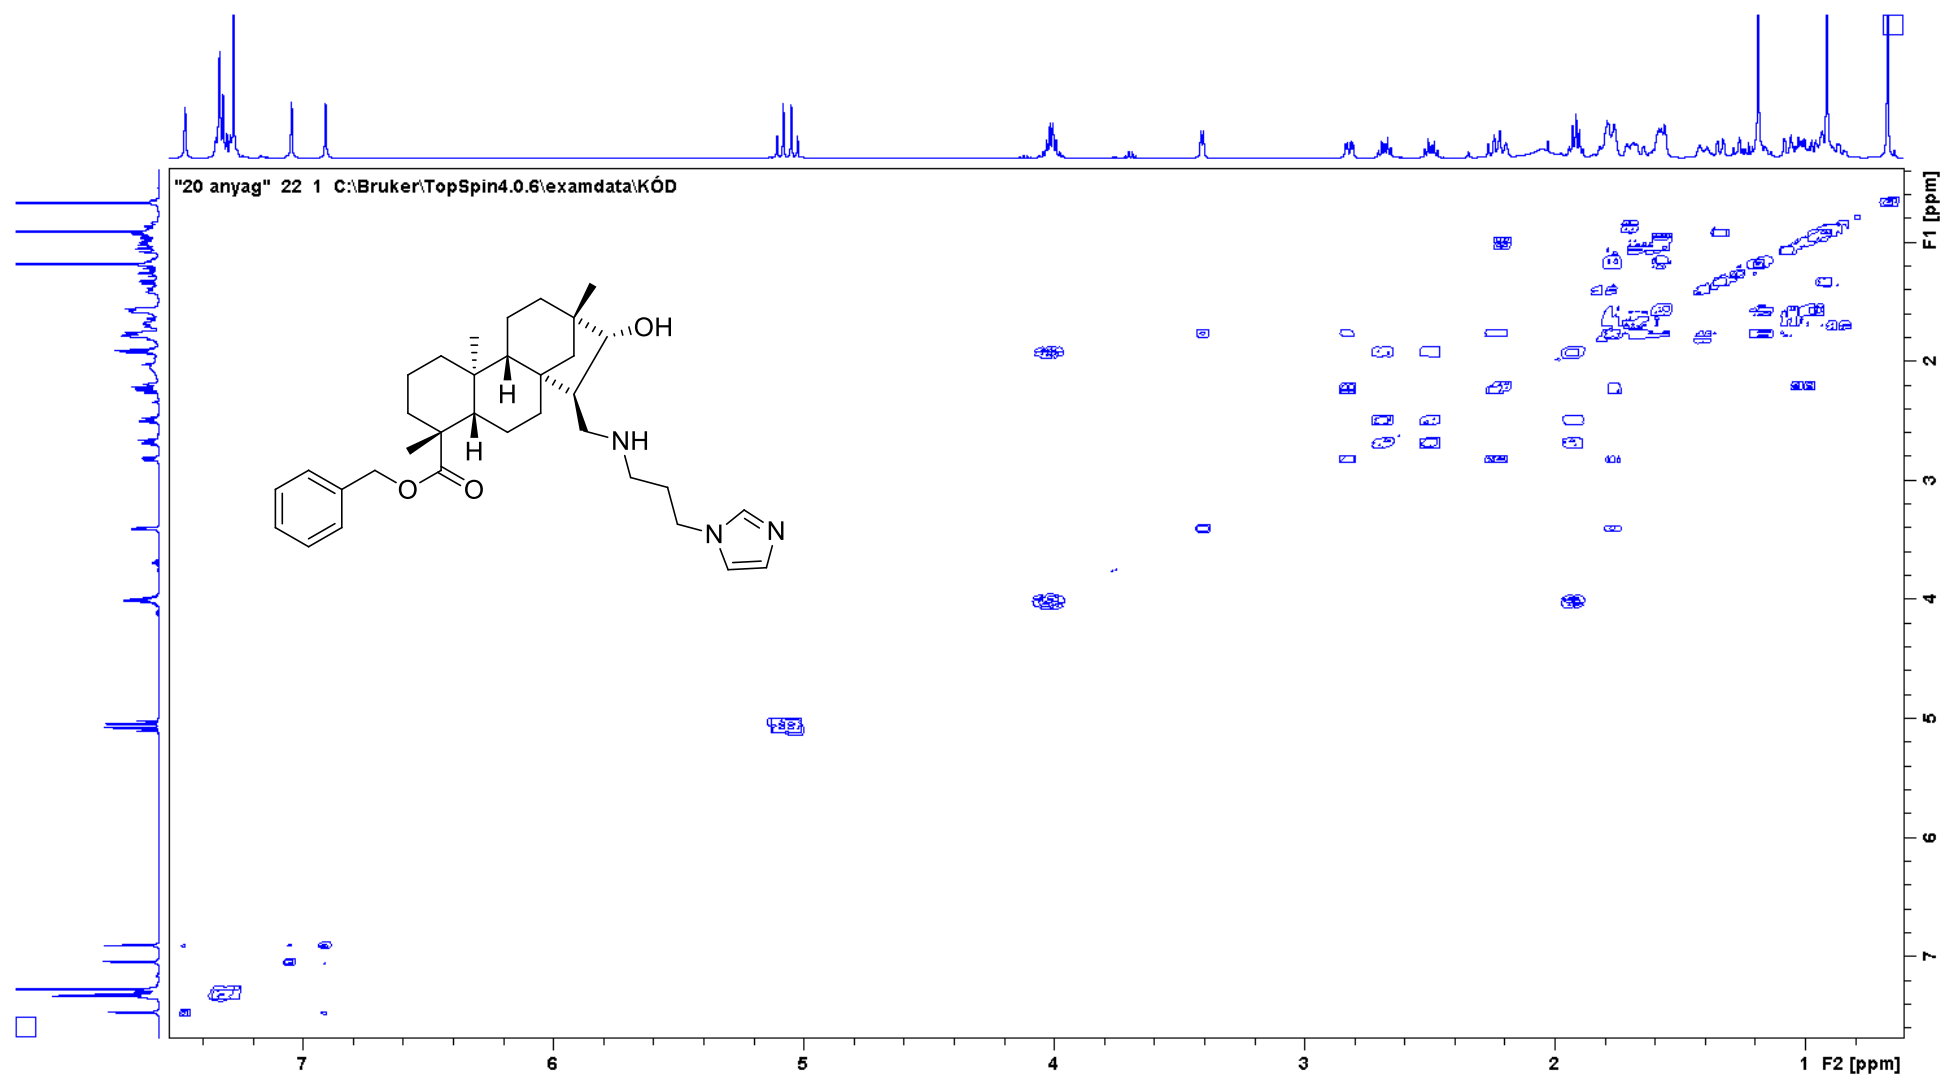

Figure S100

NOESY of compound (4*R*,4*aS*,7*R*,8*R*,11*bS*)-Benzyl 7-(((3-(1*H*-imidazol-1-yl)propyl)amino)methyl)-8-hydroxy-4,9,11*b*-trimethyltetradecahydro-6*a*,9-methanocyclohepta[*a*]naphthalene-4-carboxylate (**20**):

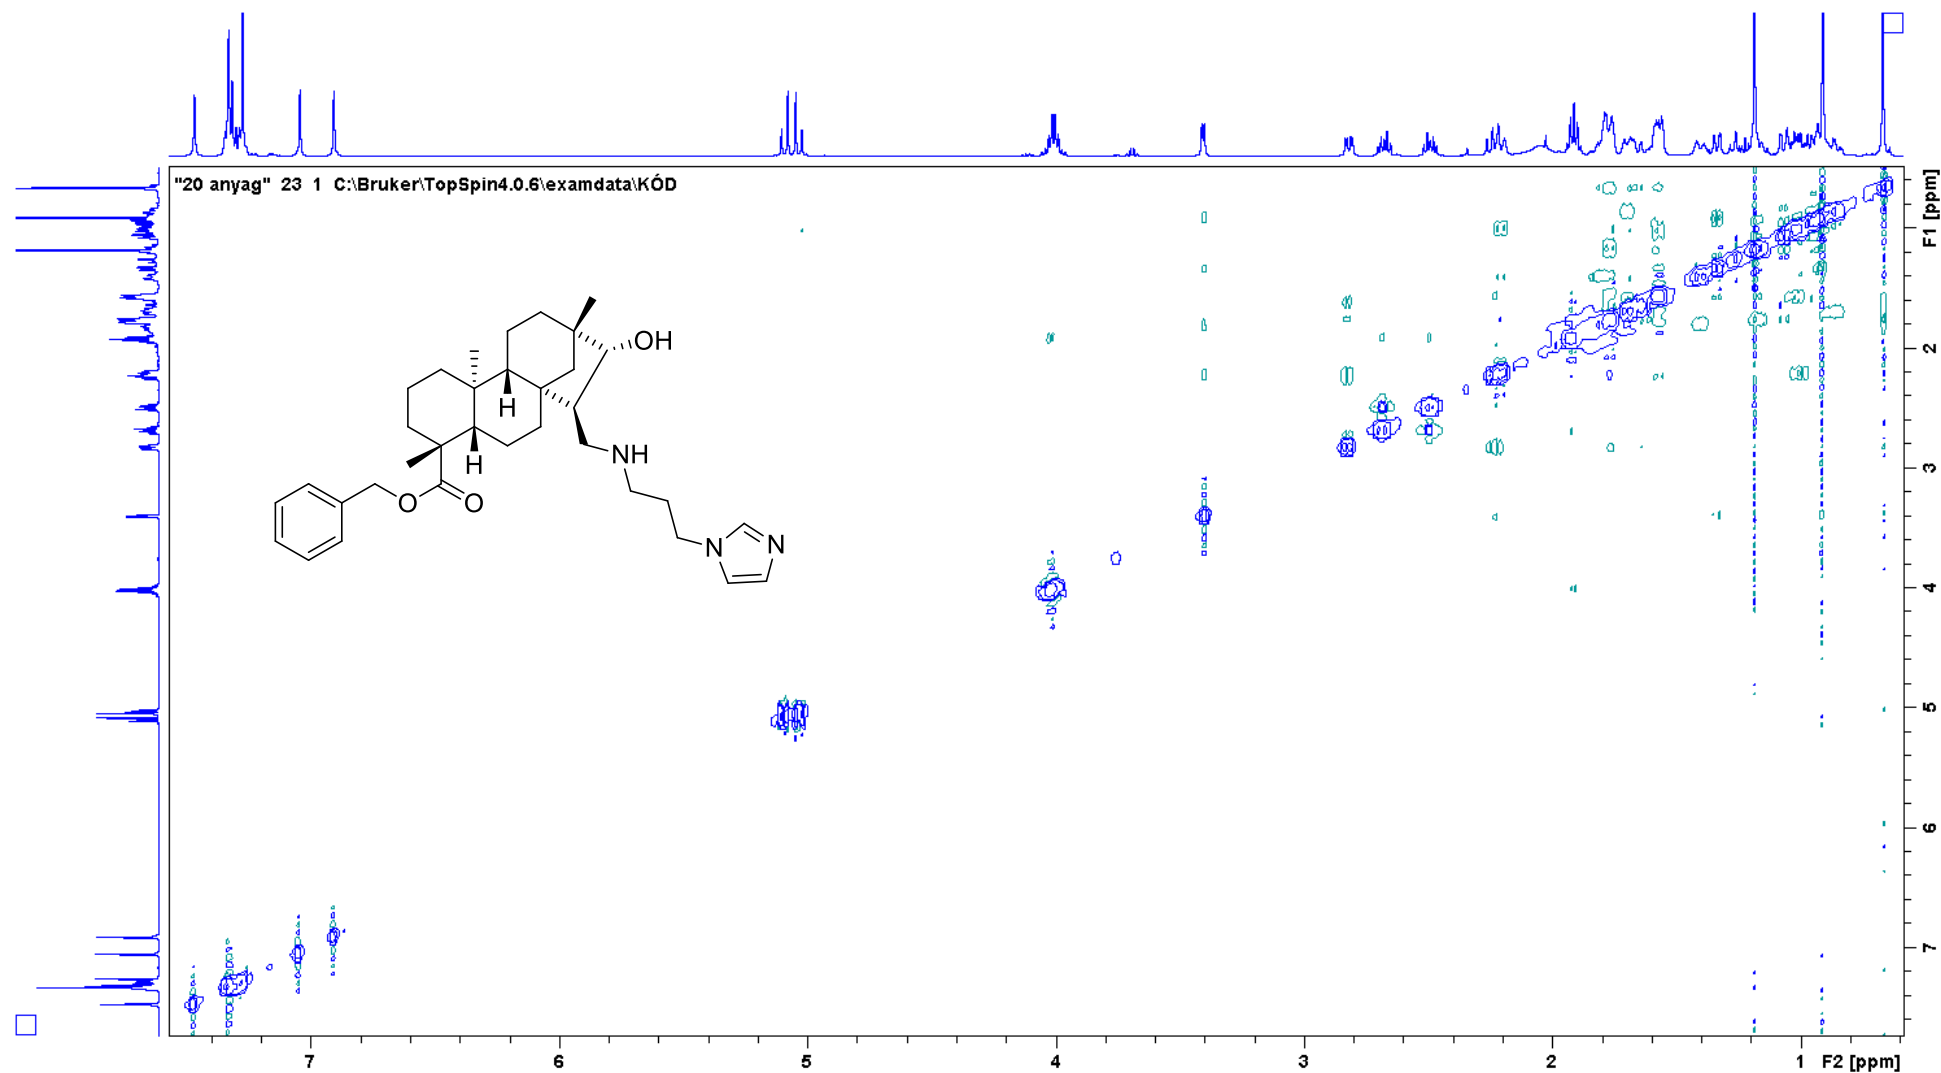

Figure S101

HSQC of compound (4*R*,4*a**S*,7*R*,8*R*,11*b**S*)-Benzyl 7-(((3-(1*H*-imidazol-1-yl)propyl)amino)methyl)-8-hydroxy-4,9,11*b*-trimethyltetradecahydro-6*a*,9-methanocyclohepta[*a*]naphthalene-4-carboxylate (**20**):

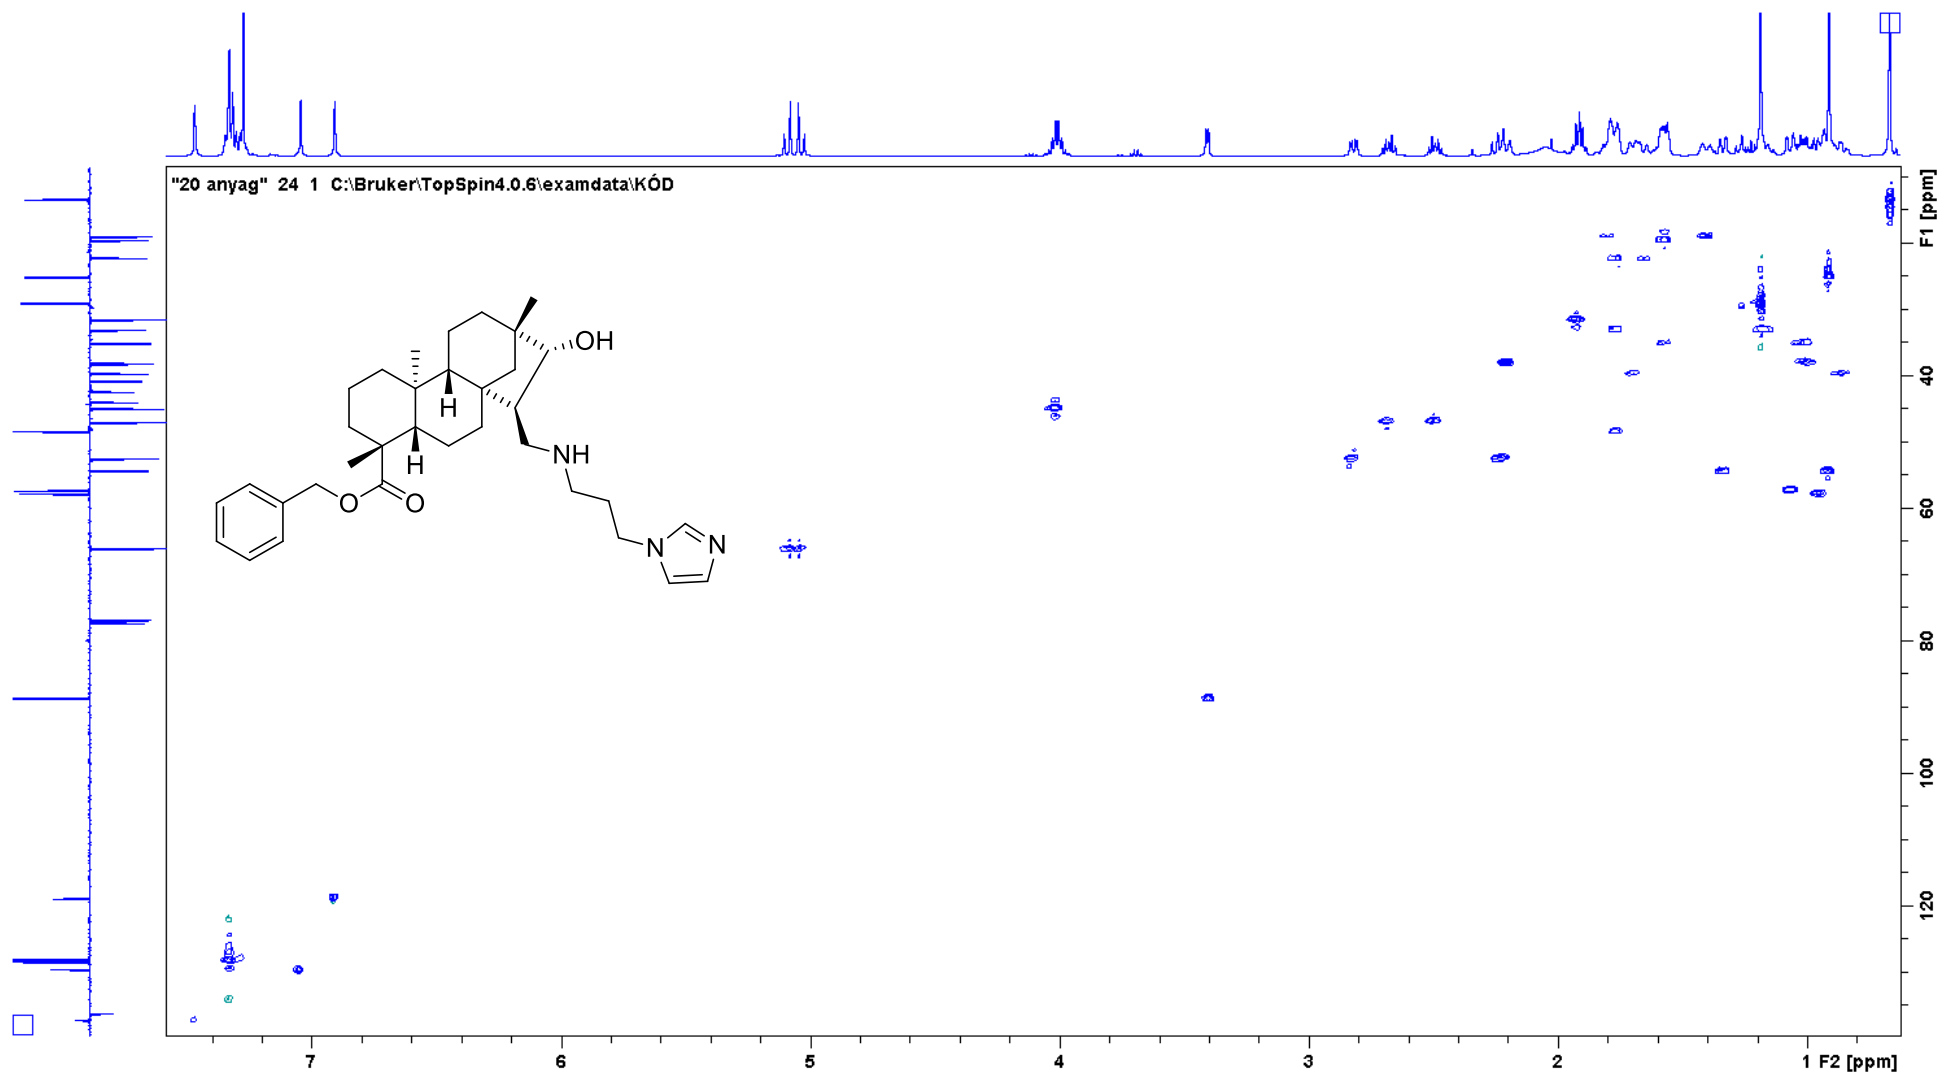



Figure S102

HMBC of compound (4*R*,4*aS*,7*R*,8*R*,11*bS*)-Benzyl 7-(((3-(1*H*-imidazol-1-yl)propyl)amino)methyl)-8-hydroxy-4,9,11*b*-trimethyltetradecahydro-6*a*,9-methanocyclohepta[*a*]naphthalene-4-carboxylate (**20**):

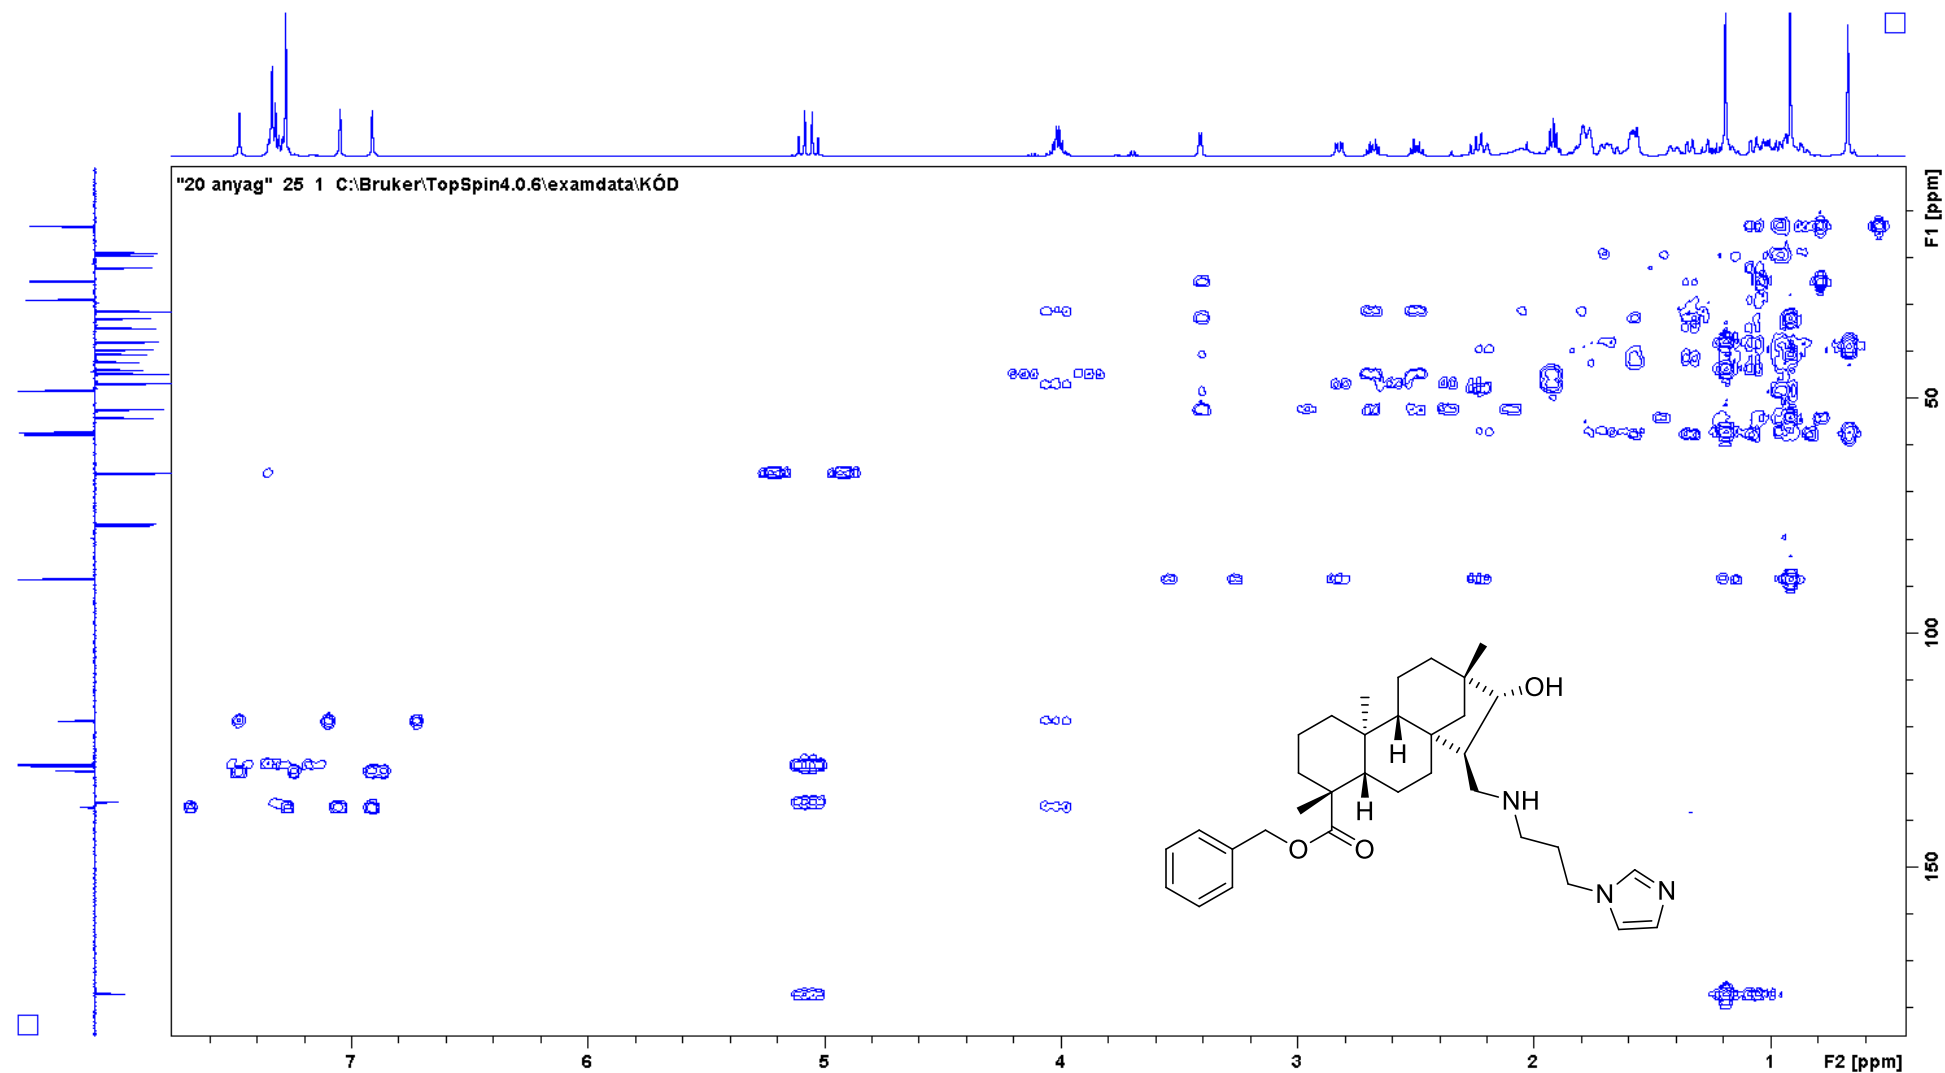

Figure S103

<sup>1</sup>H-NMR of compound (4*R*,4*aS*,6*aS*,7*R*,8*R*,9*S*,11*bS*)-Methyl 7-((((*R*)-1-(4-fluorophenyl)ethyl)amino)methyl)-8-hydroxy-4,9,11*b*-trimethyltetradecahydro-6*a*,9-methanocyclohepta[*a*]naphthalene-4-carboxylate (**23**):

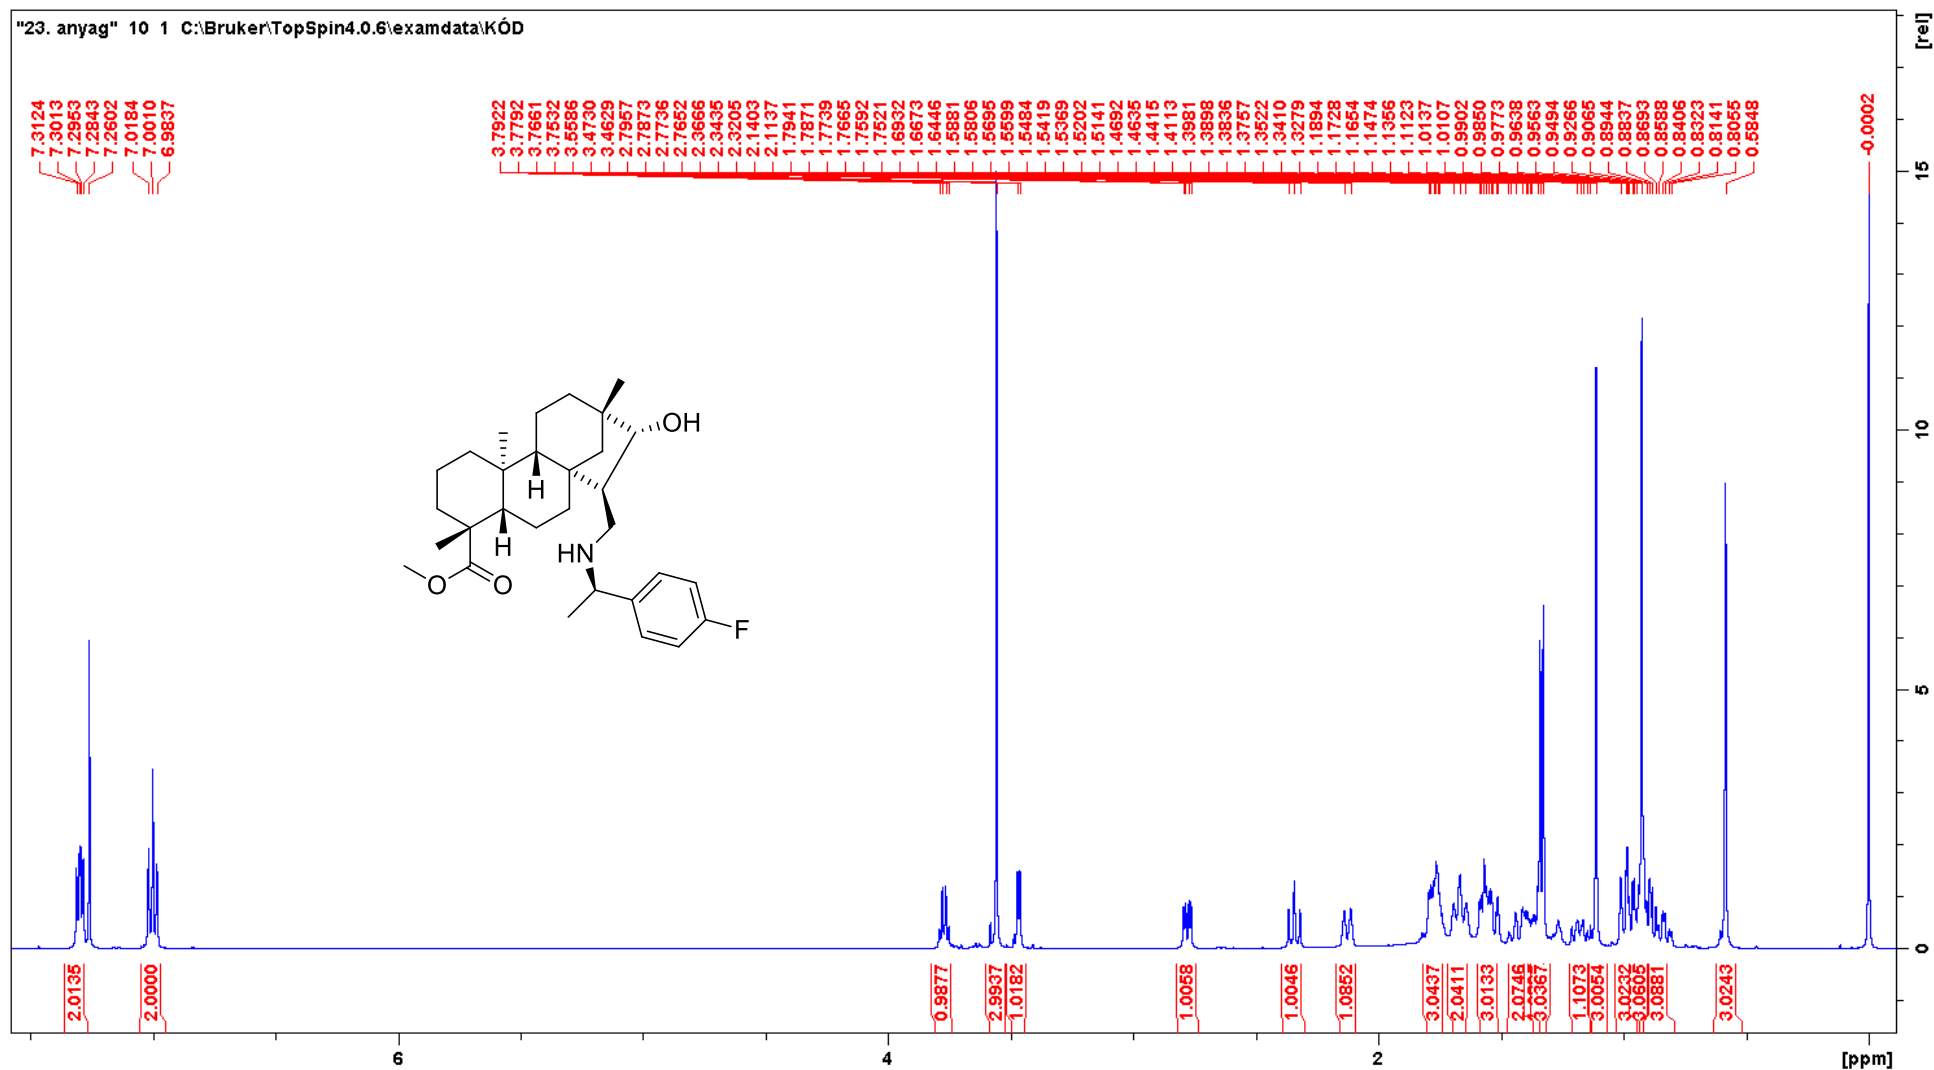

Figure S104

$^{13}\text{C}$ -NMR of compound (4*R*,4*aS*,6*aS*,7*R*,8*R*,9*S*,11*bS*)-Methyl 7-((((*R*)-1-(4-fluorophenyl)ethyl)amino)methyl)-8-hydroxy-4,9,11*b*-trimethyltetradecahydro-6*a*,9-methanocyclohepta[*a*]naphthalene-4-carboxylate (**23**):

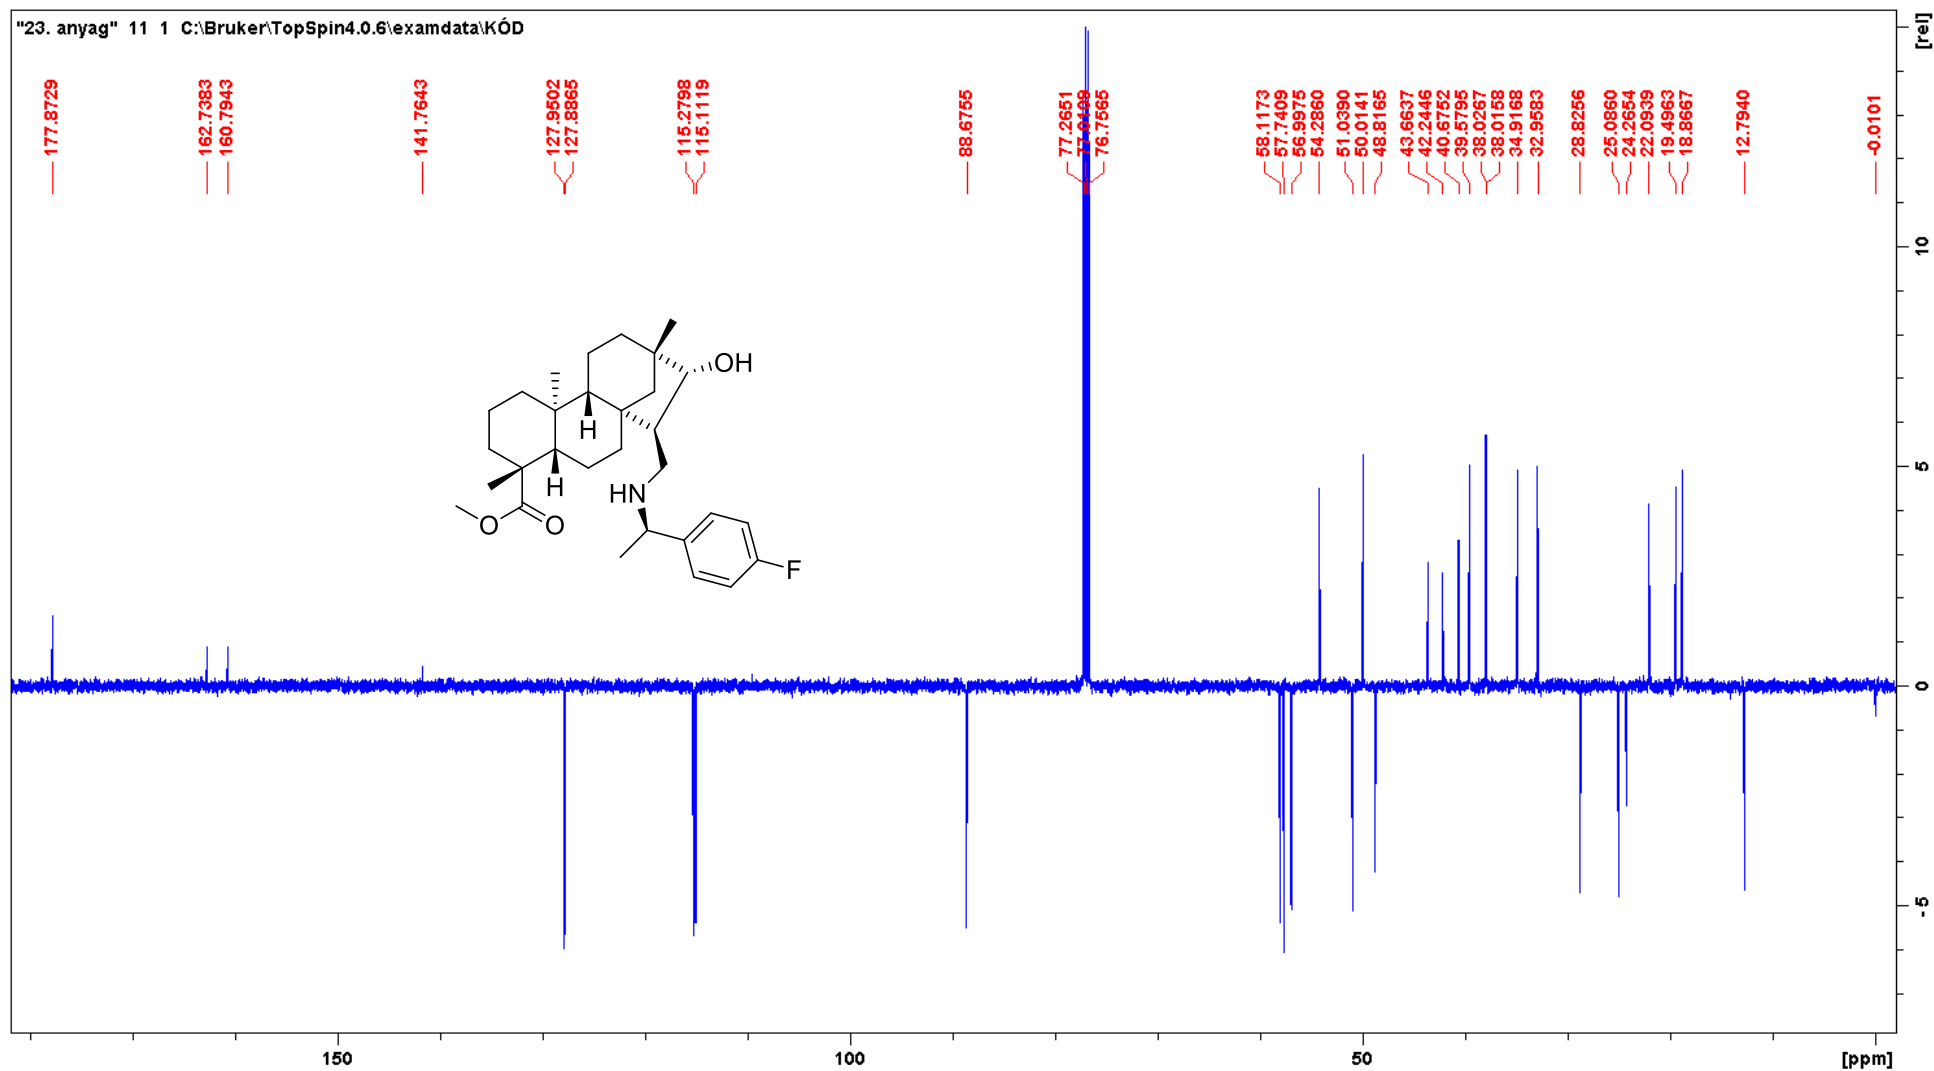

Figure S105

COSY of compound (4*R*,4*aS*,6*aS*,7*R*,8*R*,9*S*,11*bS*)-Methyl 7-((((*R*)-1-(4-fluorophenyl)ethyl)amino)methyl)-8-hydroxy-4,9,11*b*-trimethyltetradecahydro-6*a*,9-methanocyclohepta[*a*]naphthalene-4-carboxylate (**23**):

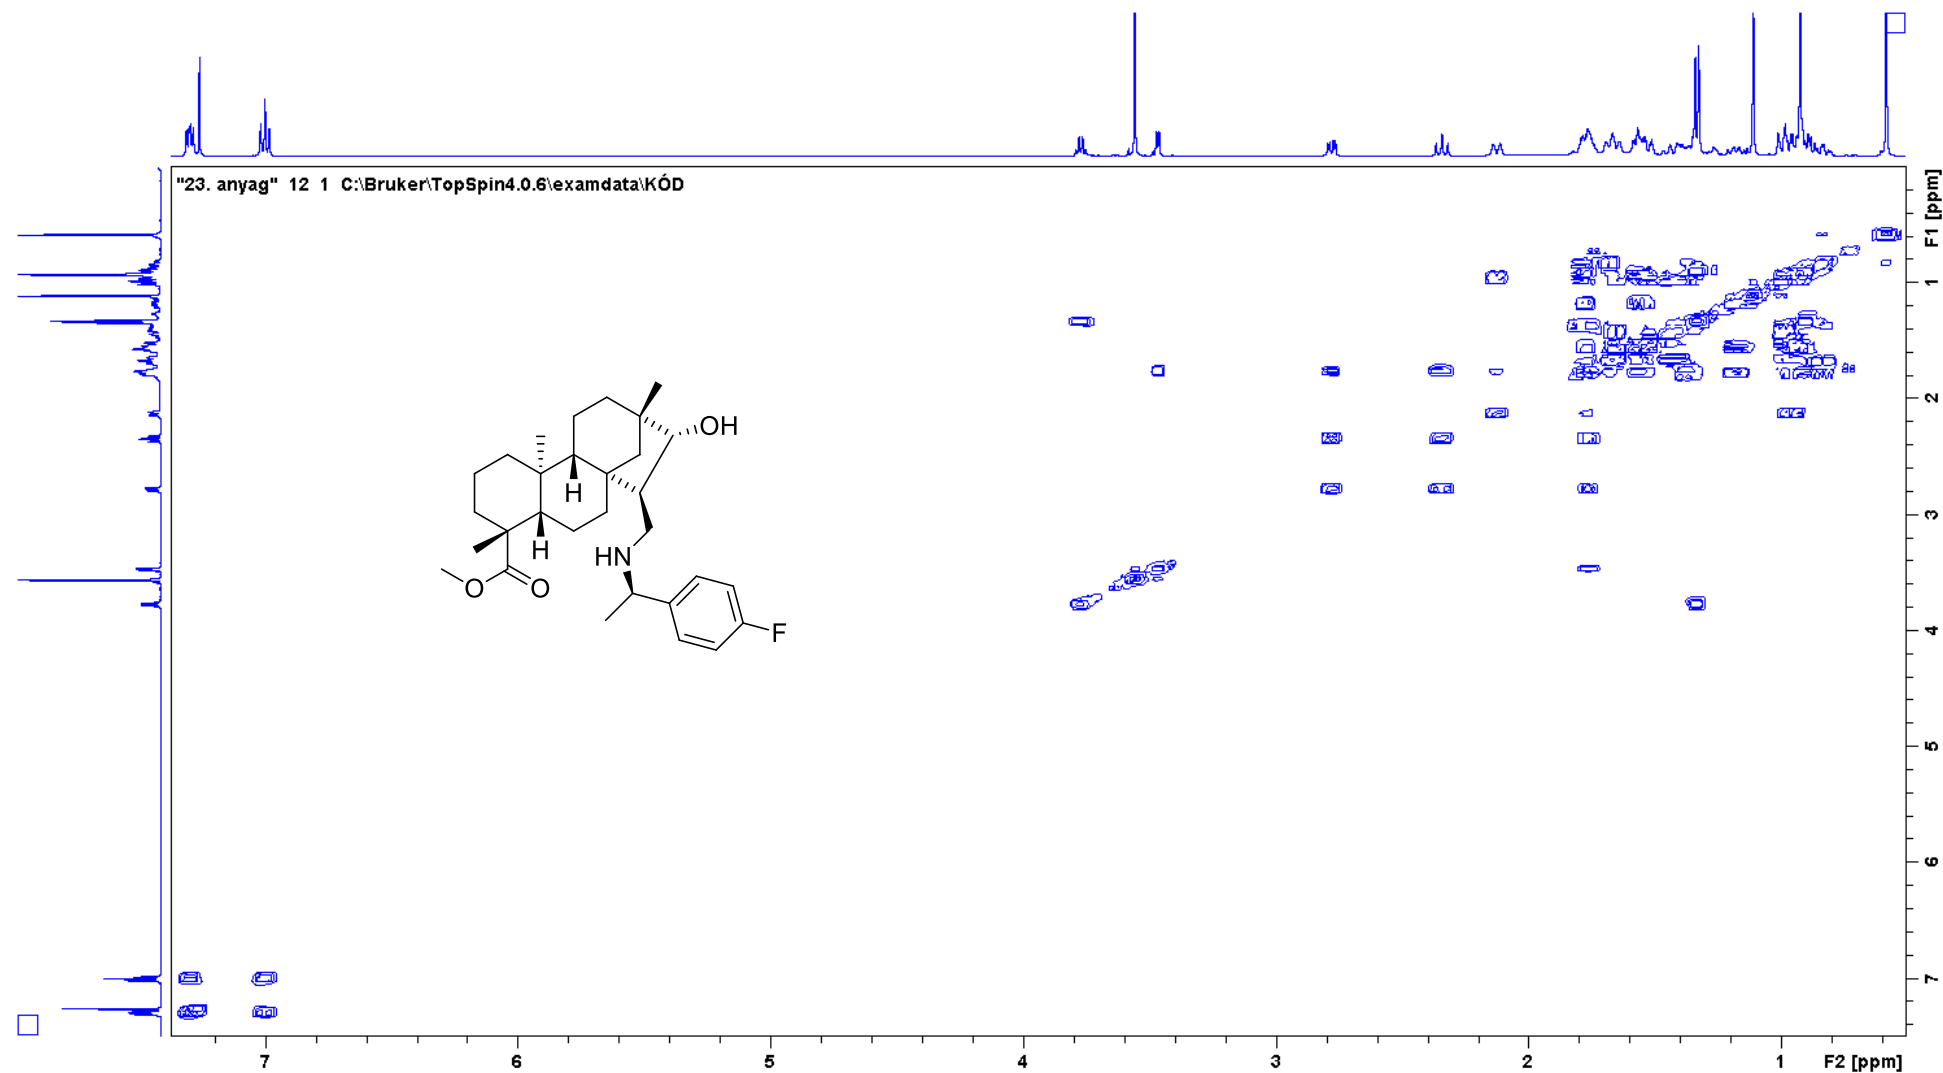

Figure S106

NOESY of compound (4*R*,4*aS*,6*aS*,7*R*,8*R*,9*S*,11*bS*)-Methyl 7-((((*R*)-1-(4-fluorophenyl)ethyl)amino)methyl)-8-hydroxy-4,9,11*b*-trimethyltetradecahydro-6*a*,9-methanocyclohepta[*a*]naphthalene-4-carboxylate (**23**):

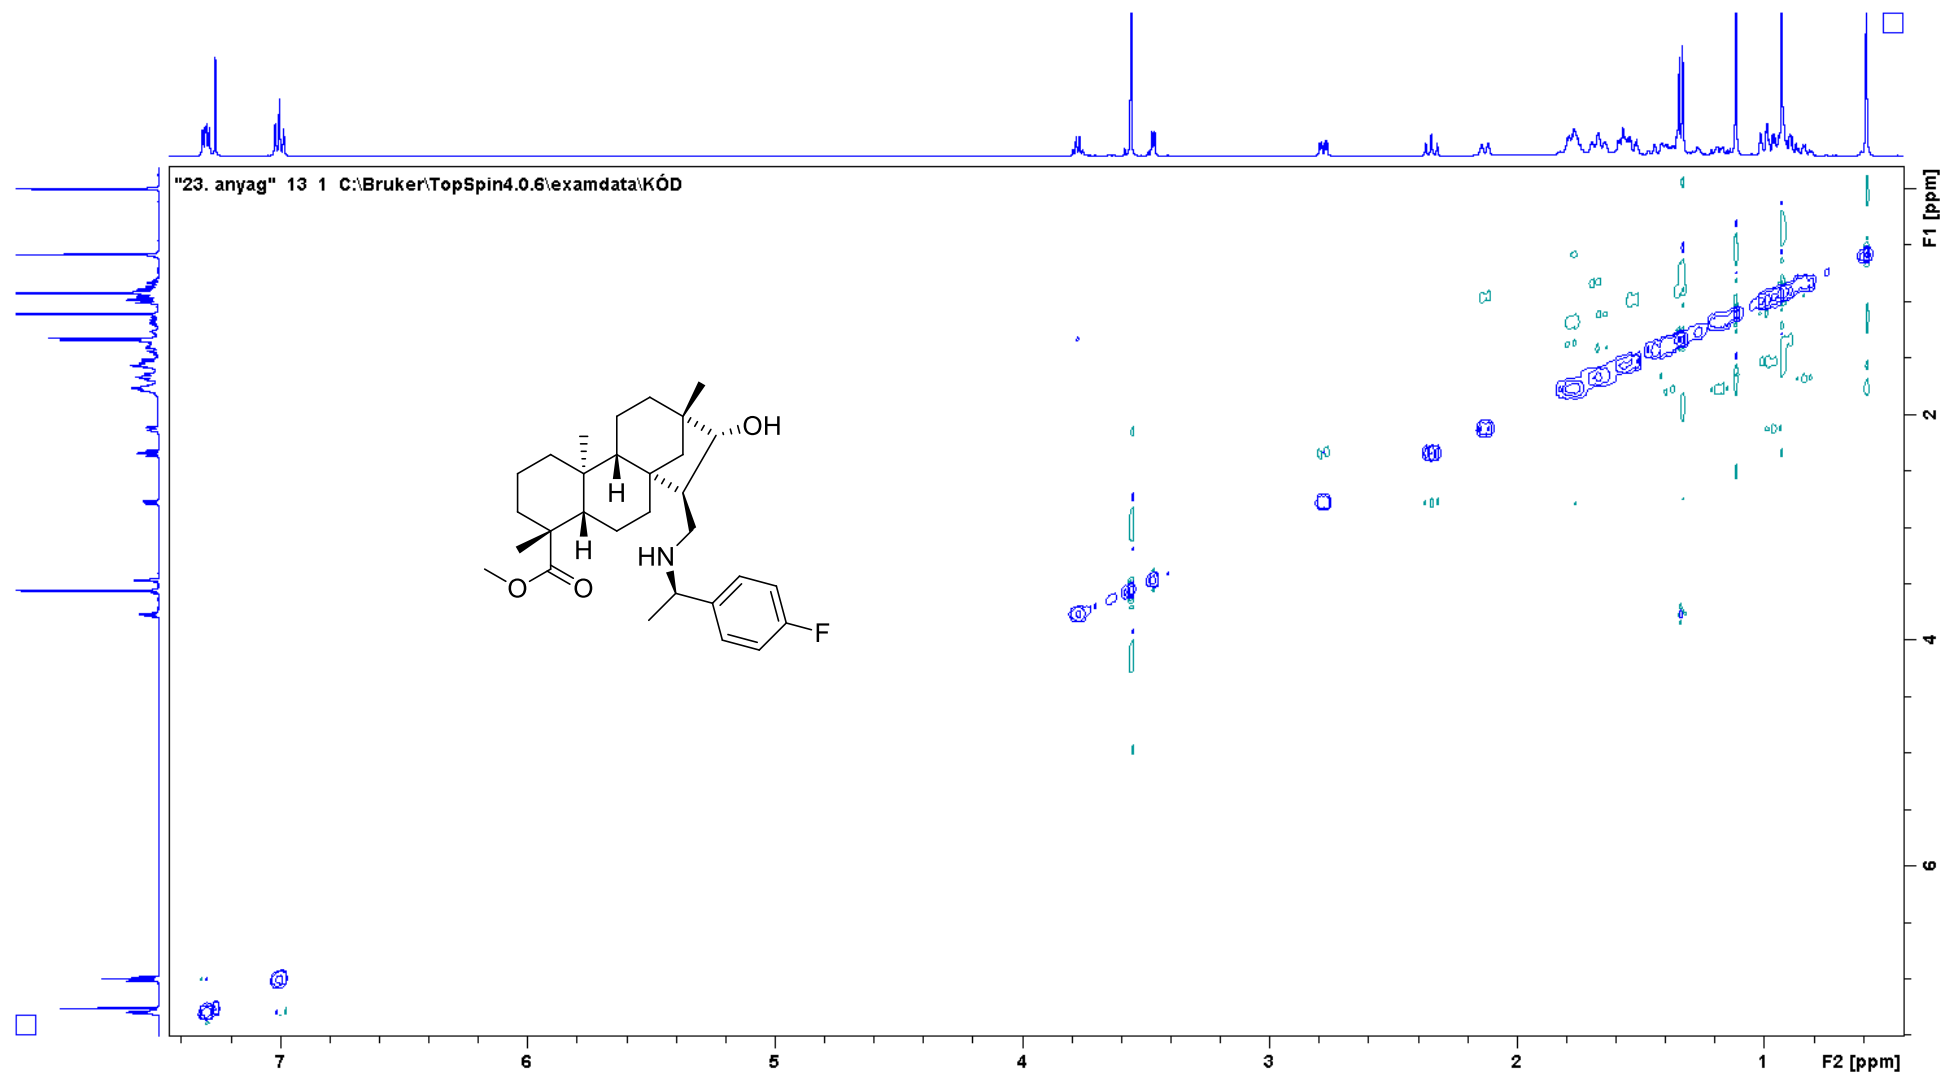

Figure S107

HSQC of compound (4*R*,4*aS*,6*aS*,7*R*,8*R*,9*S*,11*bS*)-Methyl 7-((((*R*)-1-(4-fluorophenyl)ethyl)amino)methyl)-8-hydroxy-4,9,11*b*-trimethyltetradecahydro-6*a*,9-methanocyclohepta[*a*]naphthalene-4-carboxylate (**23**):

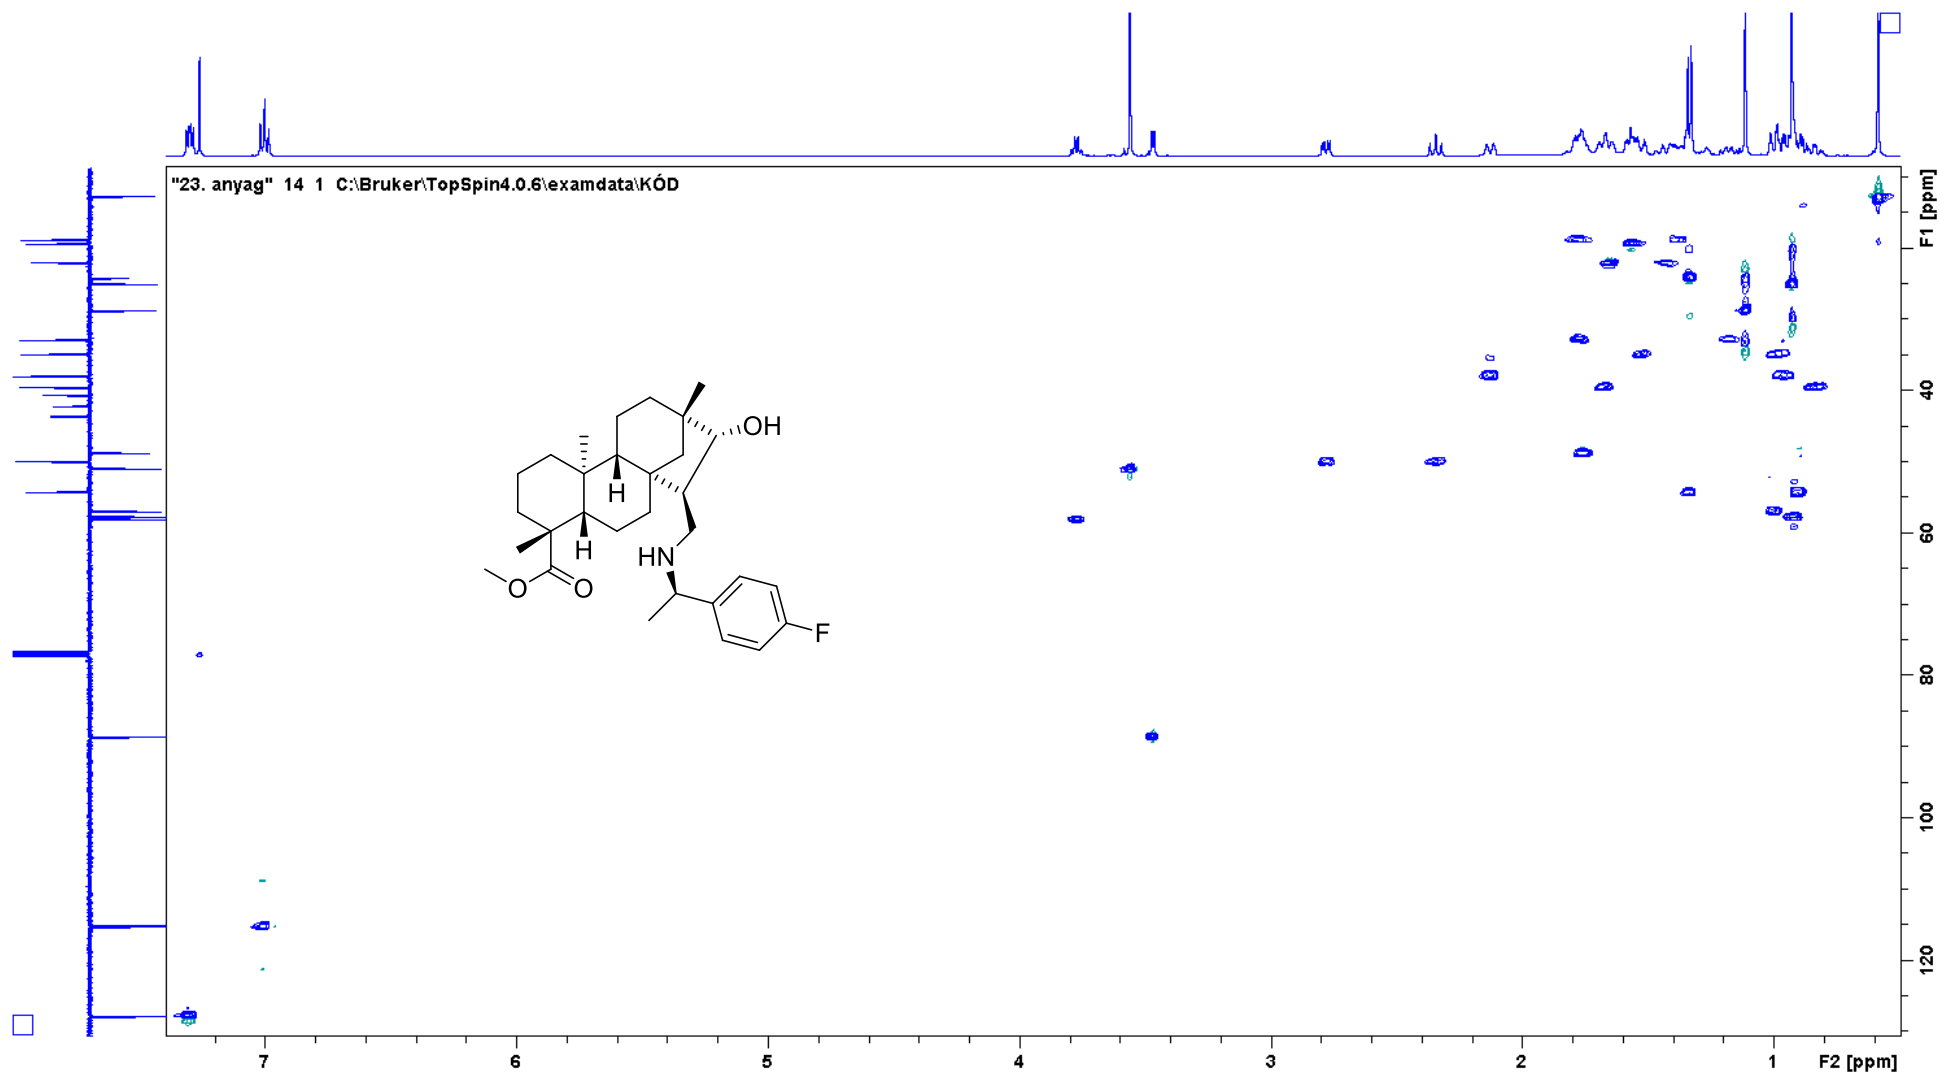

Figure S108

HMBC of compound (4*R*,4*aS*,6*aS*,7*R*,8*R*,9*S*,11*bS*)-Methyl 7-((((*R*)-1-(4-fluorophenyl)ethyl)amino)methyl)-8-hydroxy-4,9,11*b*-trimethyltetradecahydro-6*a*,9-methanocyclohepta[*a*]naphthalene-4-carboxylate (**23**):

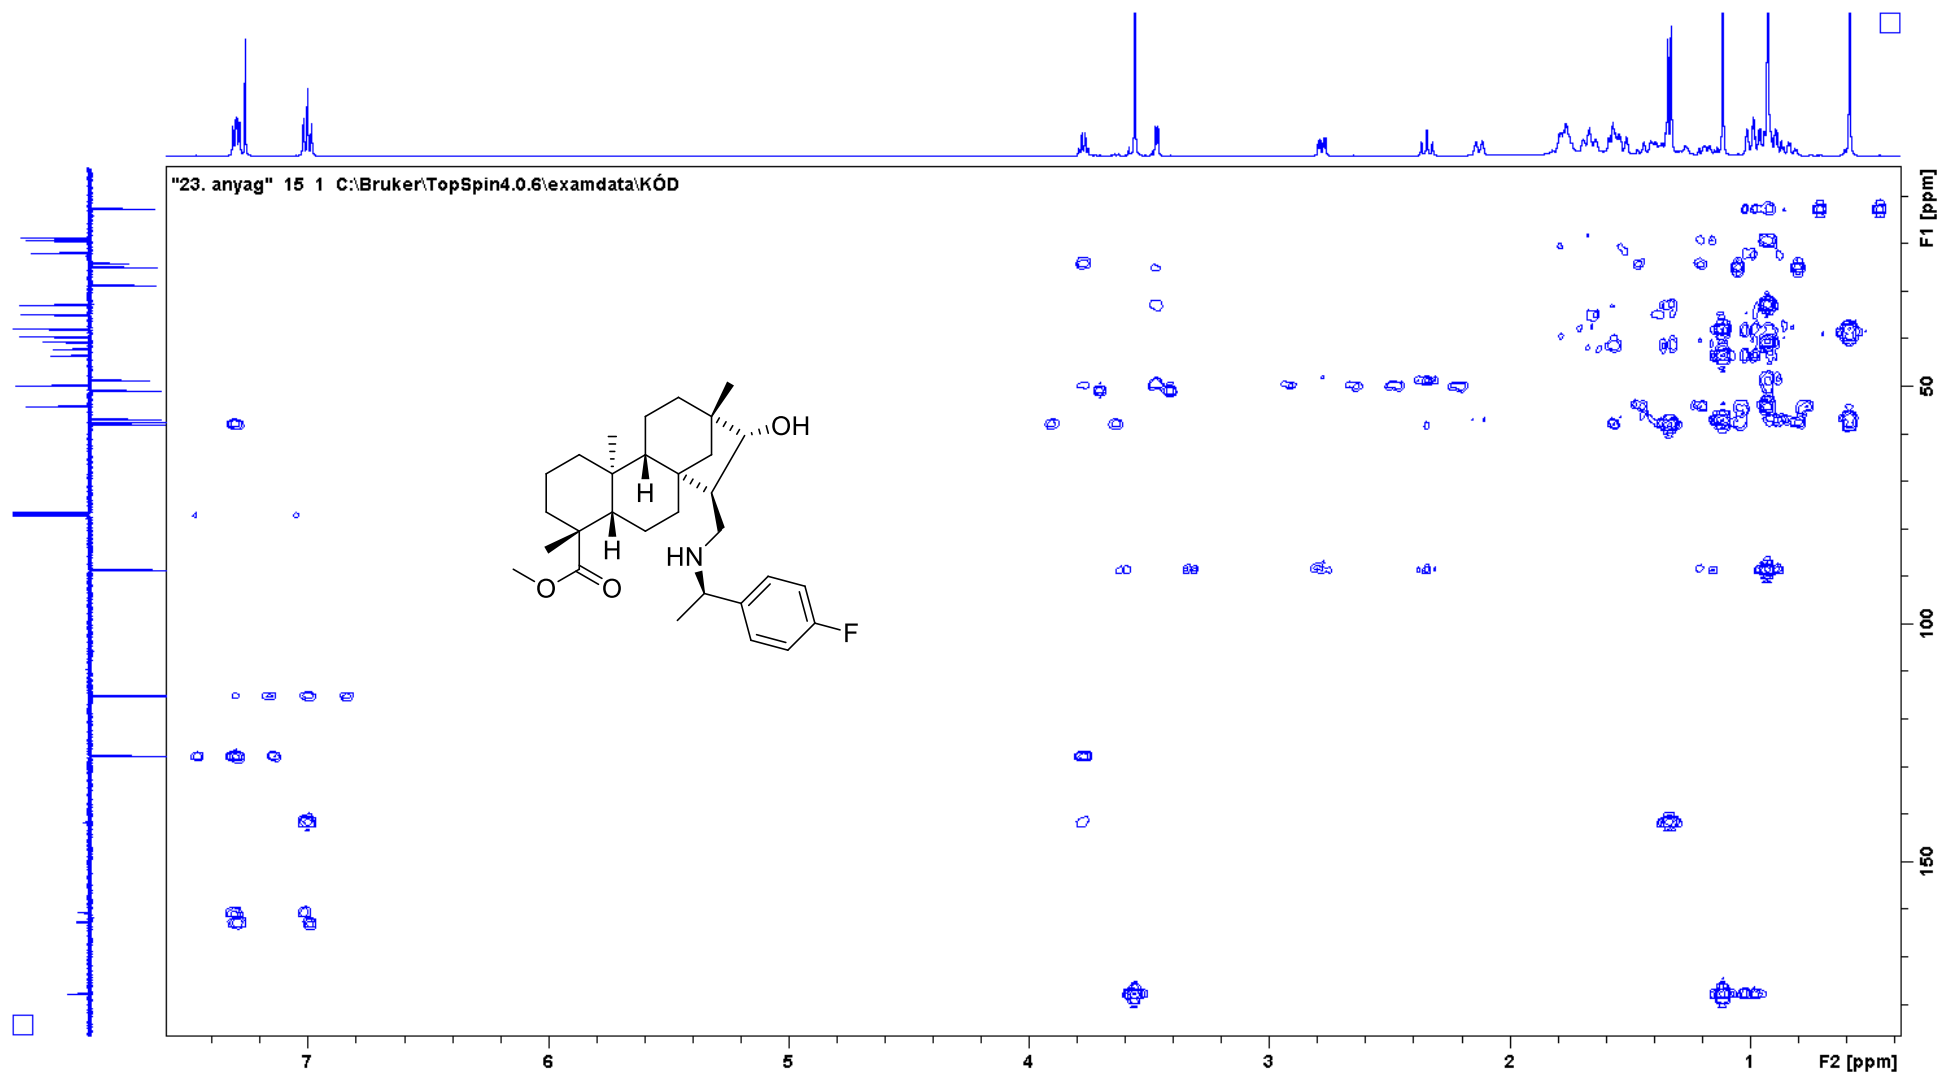

Figure S109

$^{19}\text{F}$ -NMR of compound (4*R*,4*aS*,6*aS*,7*R*,8*R*,9*S*,11*bS*)-Methyl 7-(((*R*)-1-(4-fluorophenyl)ethyl)amino)methyl)-8-hydroxy-4,9,11*b*-trimethyltetradecahydro-6*a*,9-methanocyclohepta[*a*]naphthalene-4-carboxylate (**23**):

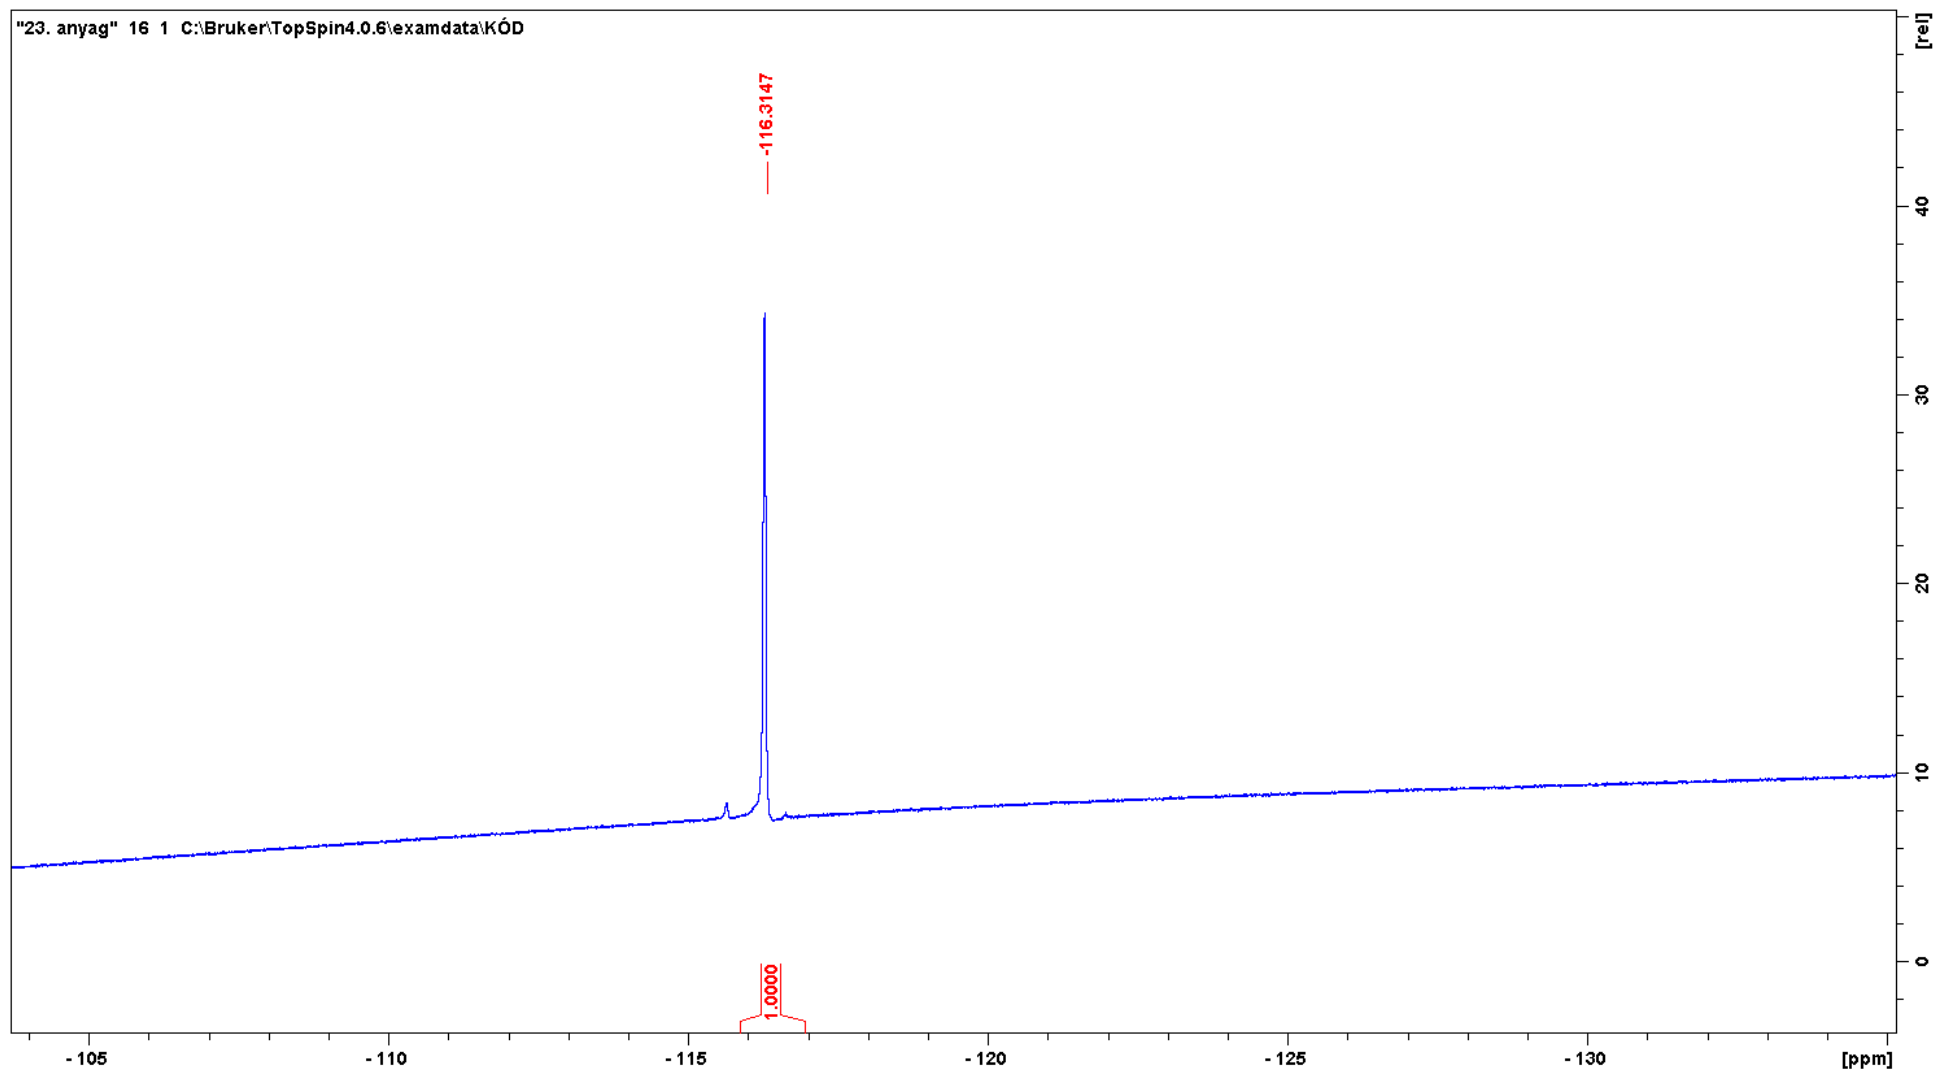



Figure S110

<sup>1</sup>H-NMR of compound (4*R*,4*aS*,6*aS*,7*R*,8*R*,9*S*,11*bS*)-Methyl 8-hydroxy-4,9,11*b*-trimethyl-7-(((*R*)-1-phenylpropyl)amino)methyl)tetradecahydro-6*a*,9-methanocyclohepta[*a*]naphthalene-4-carboxylate (**24**):

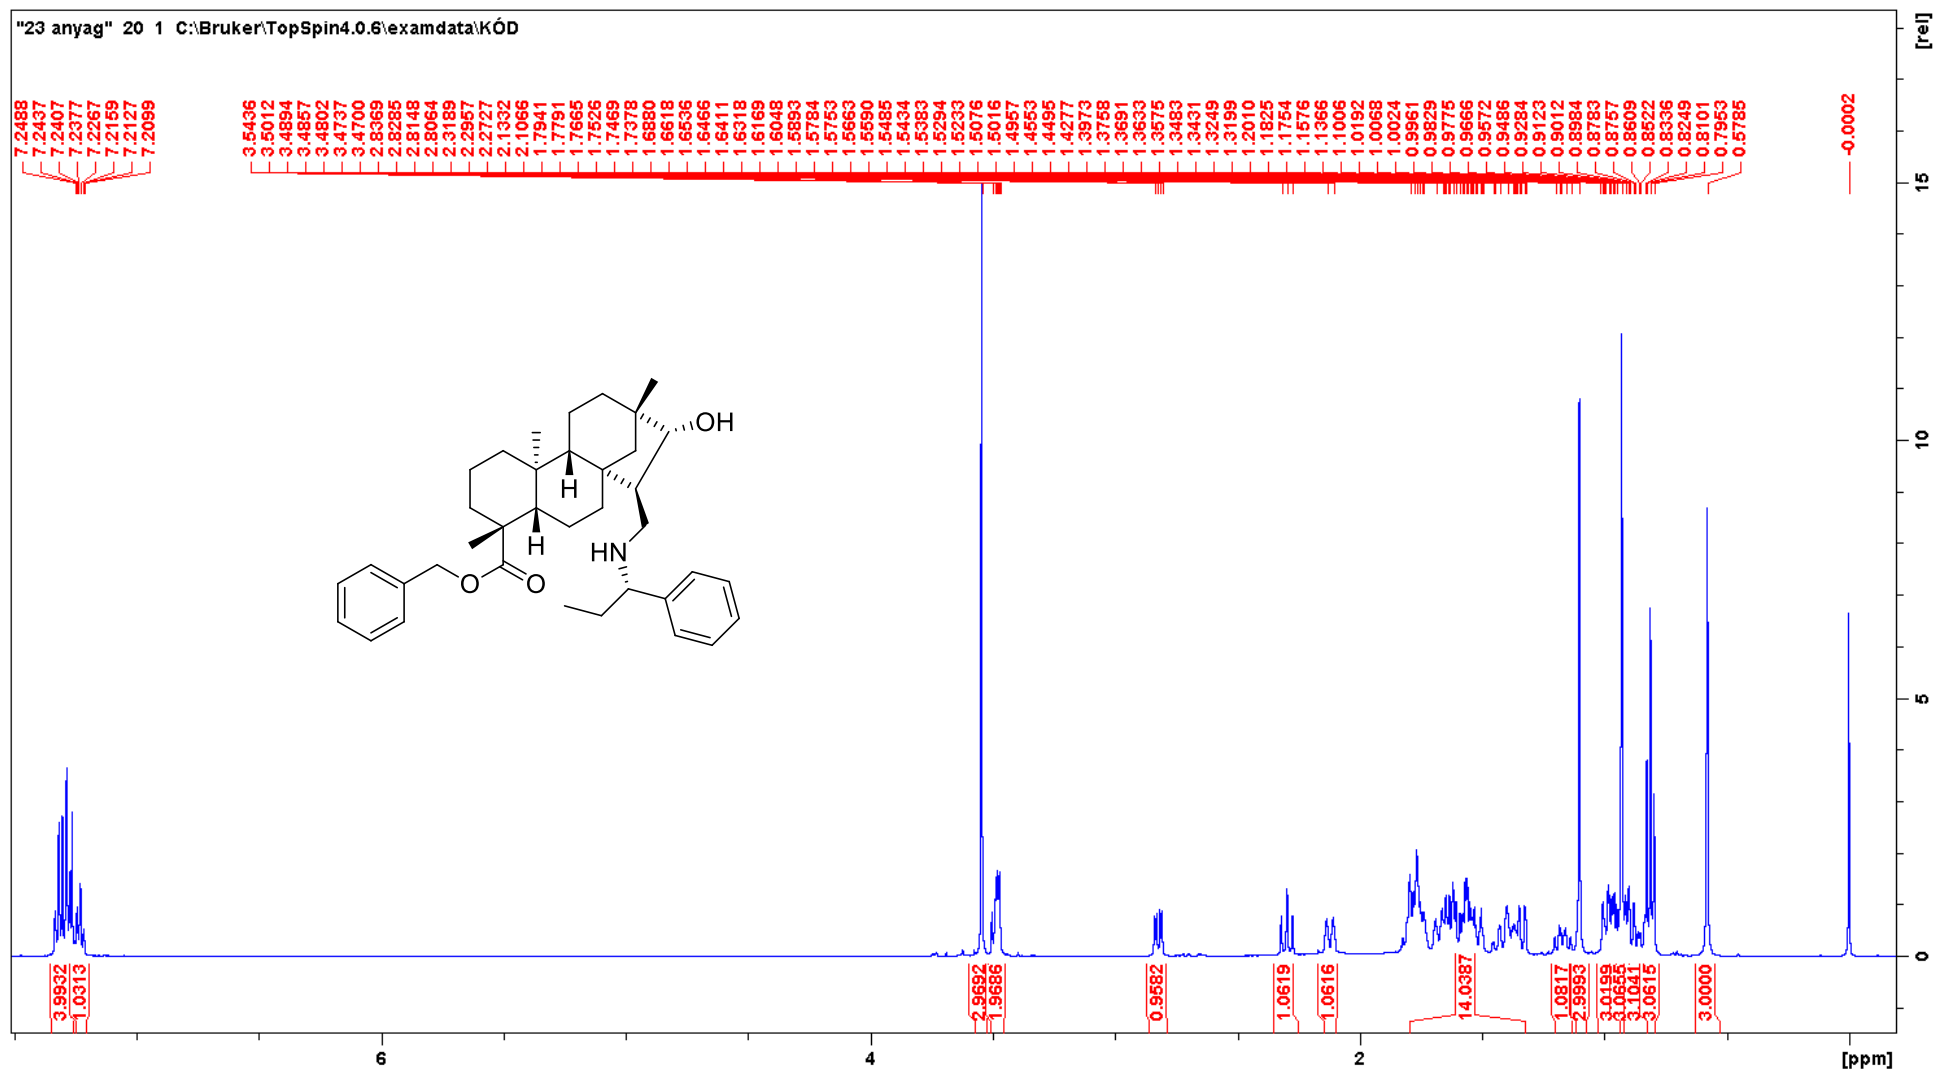

Figure S111

$^{13}\text{C}$ -NMR of compound (4*R*,4*aS*,6*aS*,7*R*,8*R*,9*S*,11*bS*)-Methyl 8-hydroxy-4,9,11*b*-trimethyl-7-(((*R*)-1-phenylpropyl)amino)methyl)tetradecahydro-6*a*,9-methanocyclohepta[*a*]naphthalene-4-carboxylate (**24**):

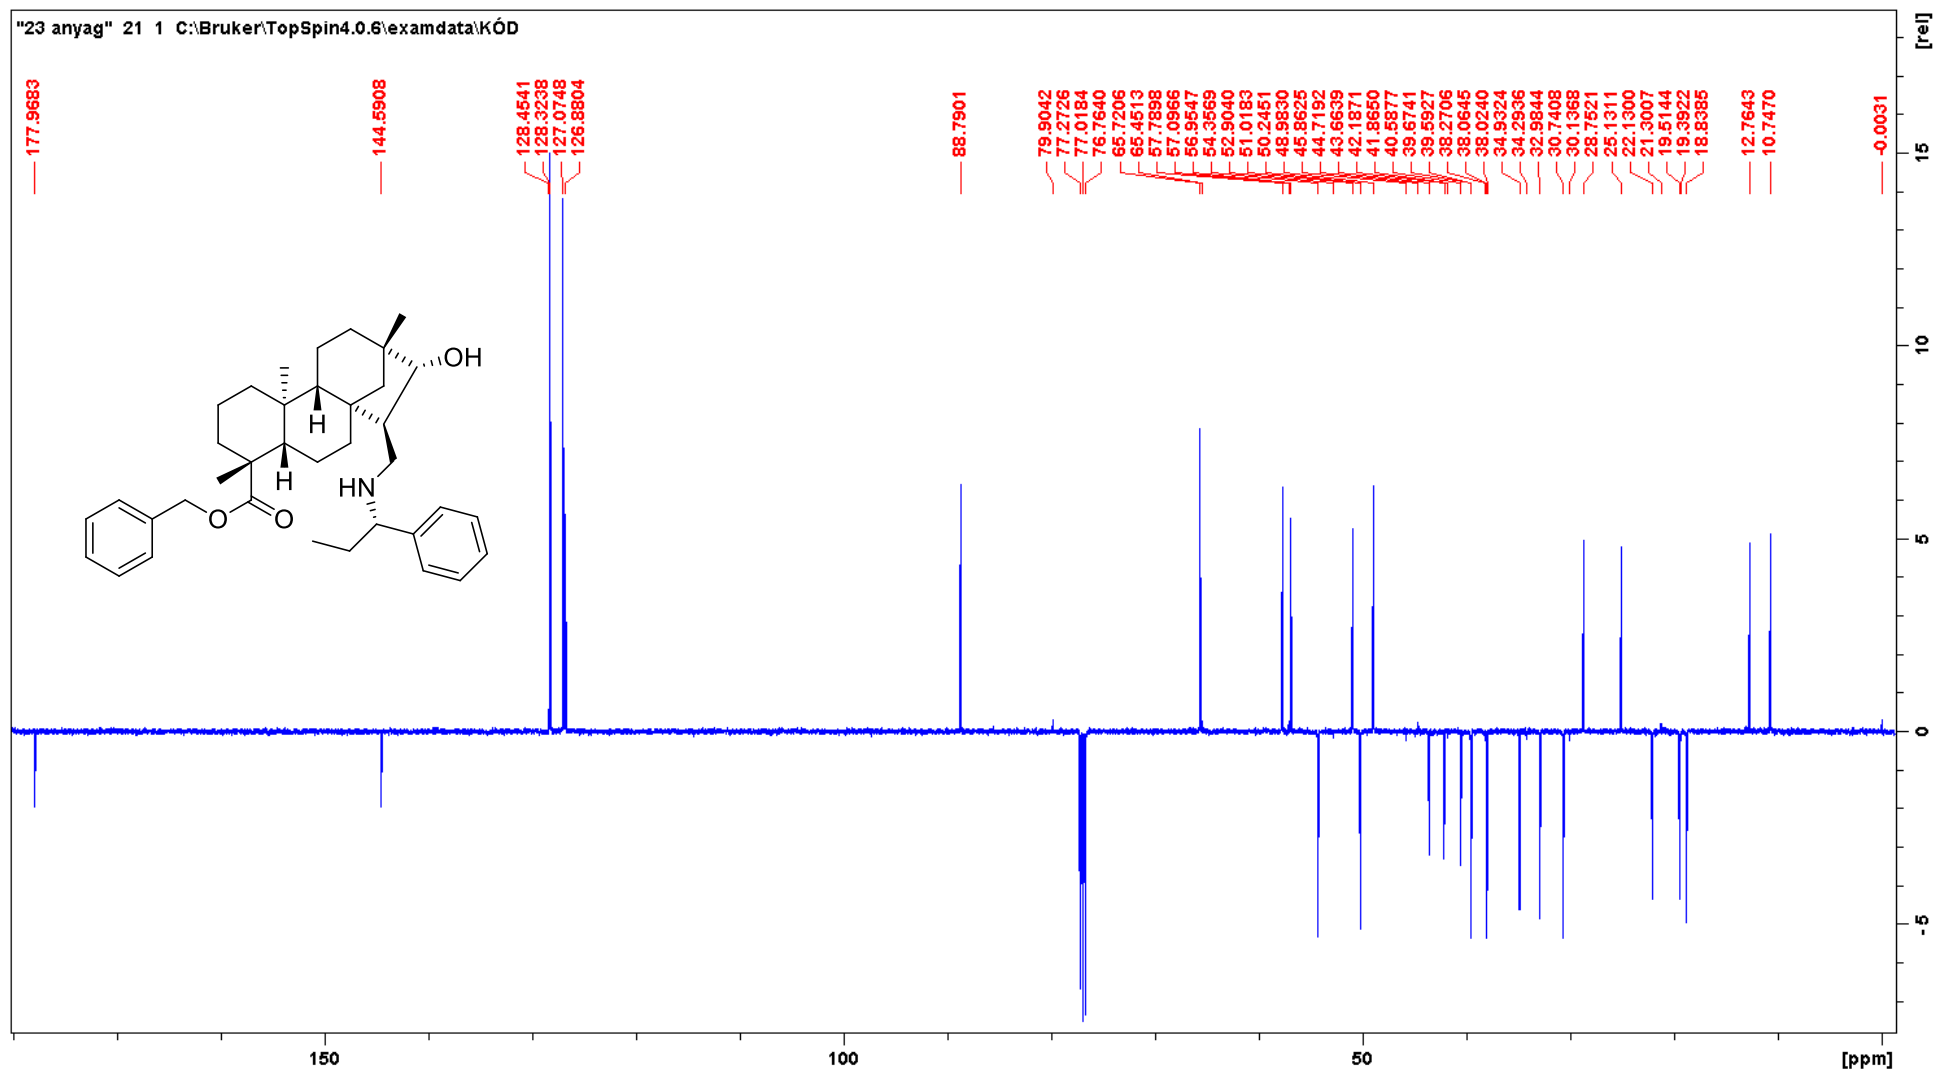

Figure S112

COSY of compound (4*R*,4*aS*,6*aS*,7*R*,8*R*,9*S*,11*bS*)-Methyl 8-hydroxy-4,9,11*b*-trimethyl-7-(((*R*)-1-phenylpropyl)amino)methyl)tetradecahydro-6*a*,9-methanocyclohepta[*a*]naphthalene-4-carboxylate (**24**):

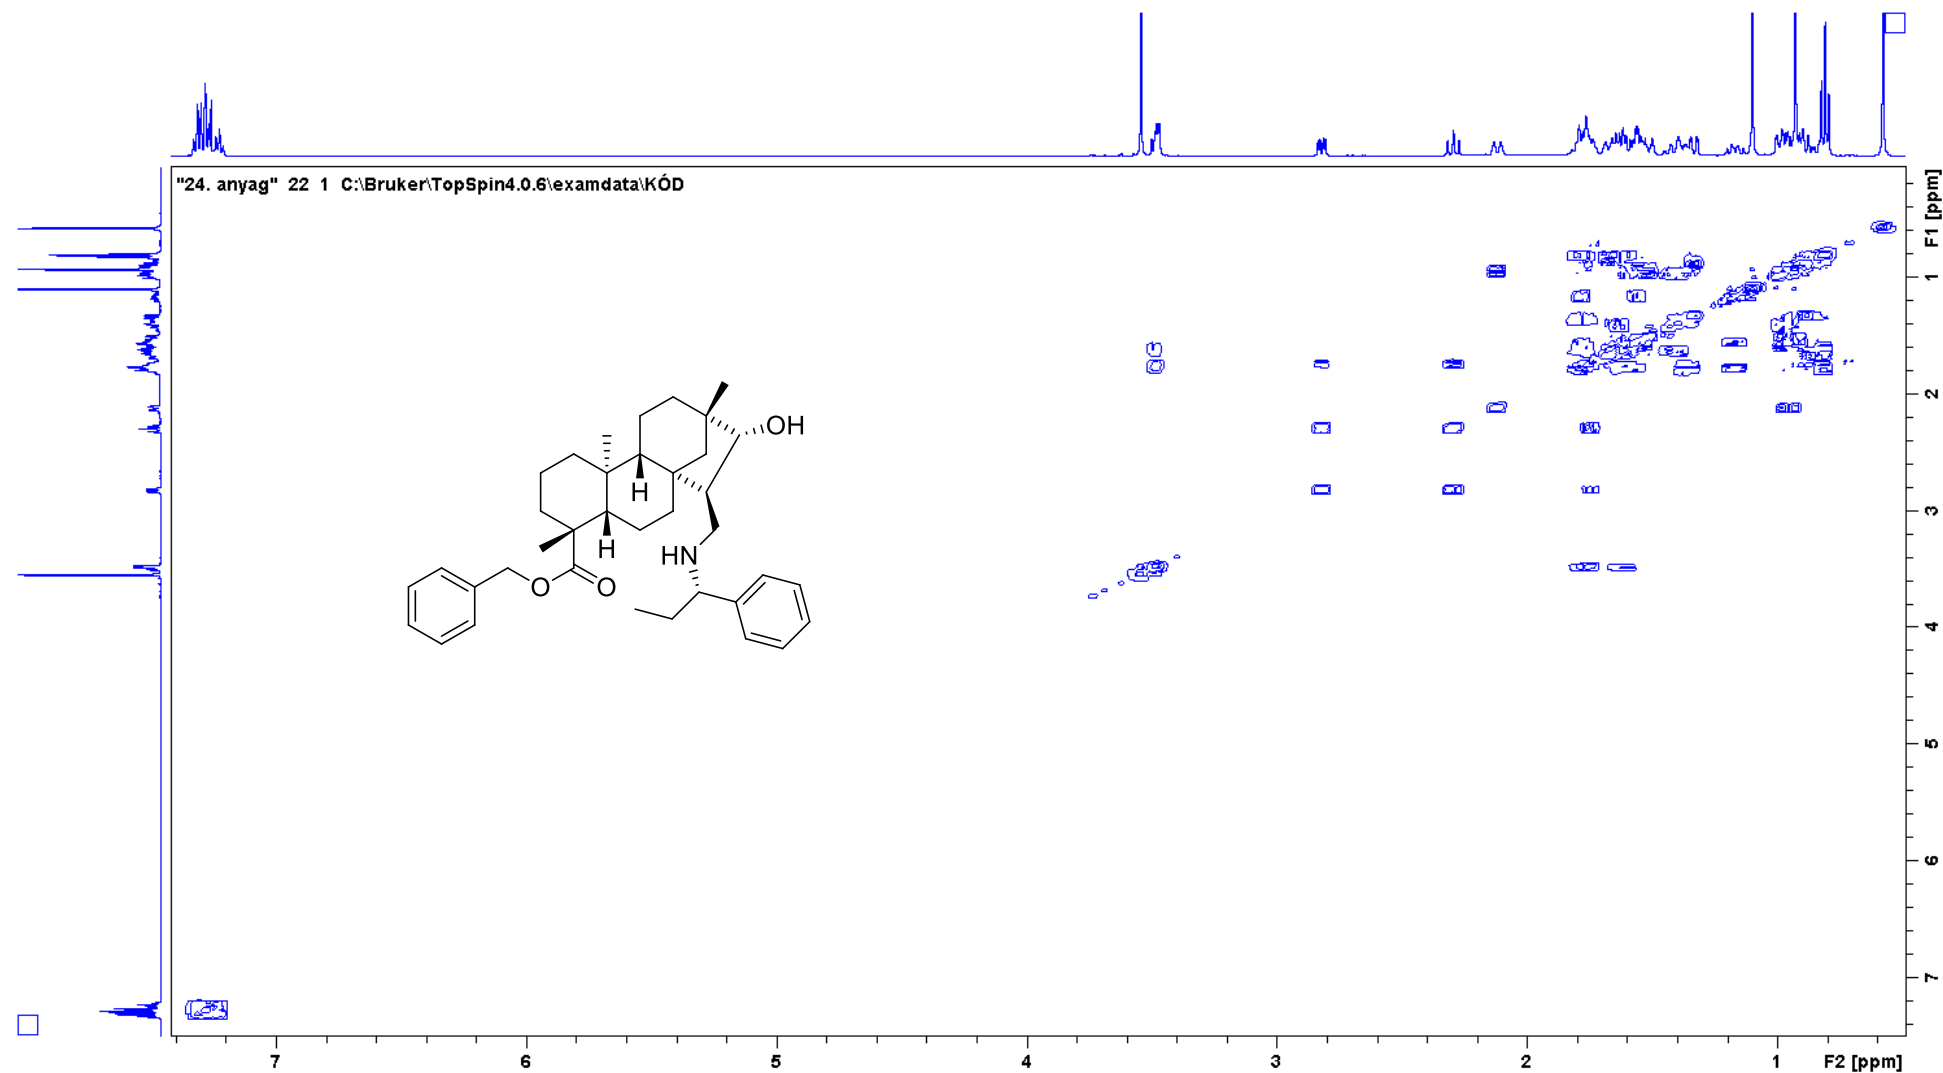

Figure S113

NOESY of compound (4*R*,4*aS*,6*aS*,7*R*,8*R*,9*S*,11*bS*)-Methyl 8-hydroxy-4,9,11*b*-trimethyl-7-(((*R*)-1-phenylpropyl)amino)methyl)tetradecahydro-6*a*,9-methanocyclohepta[*a*]naphthalene-4-carboxylate (**24**):

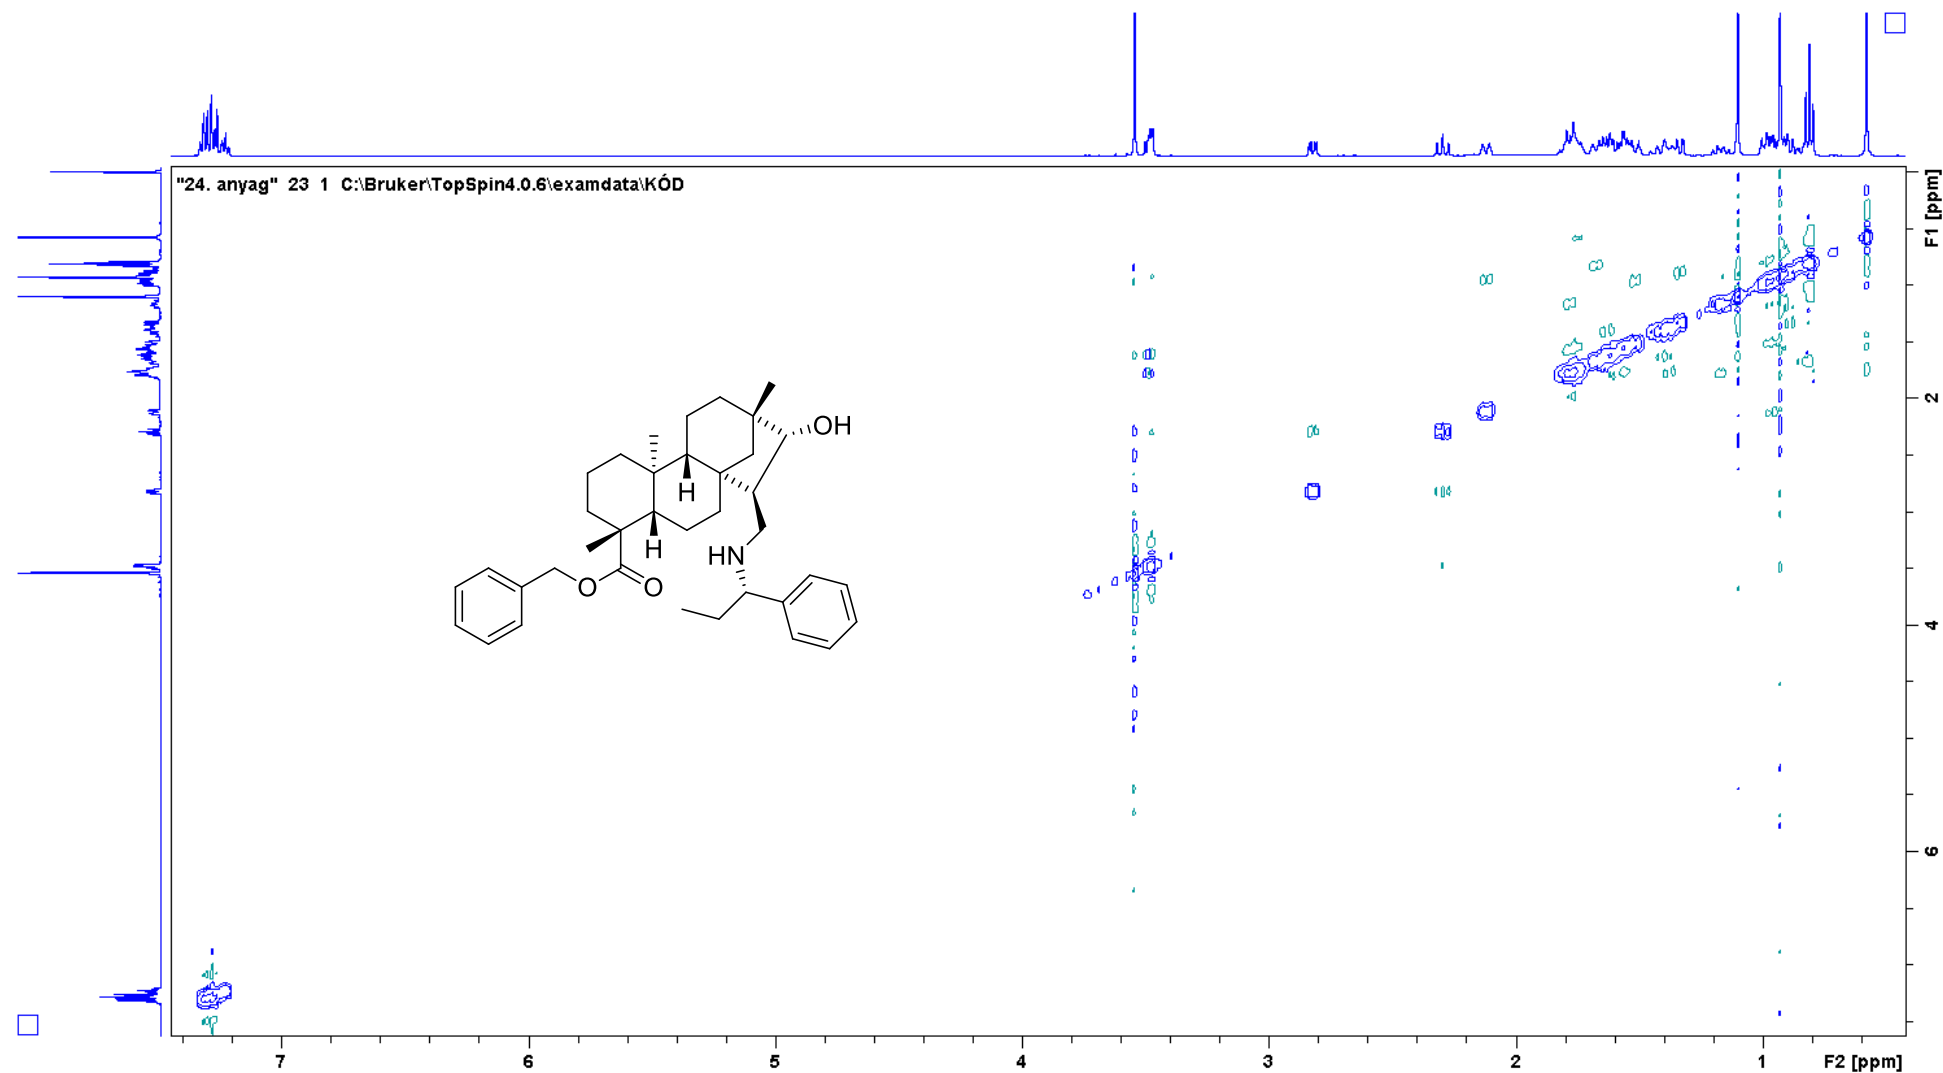

Figure S114

HSQC of compound (4*R*,4*aS*,6*aS*,7*R*,8*R*,9*S*,11*bS*)-Methyl 8-hydroxy-4,9,11*b*-trimethyl-7-(((*R*)-1-phenylpropyl)amino)methyl)tetra decahydro-6*a*,9-methanocyclohepta[*a*]naphthalene-4-carboxylate (**24**):

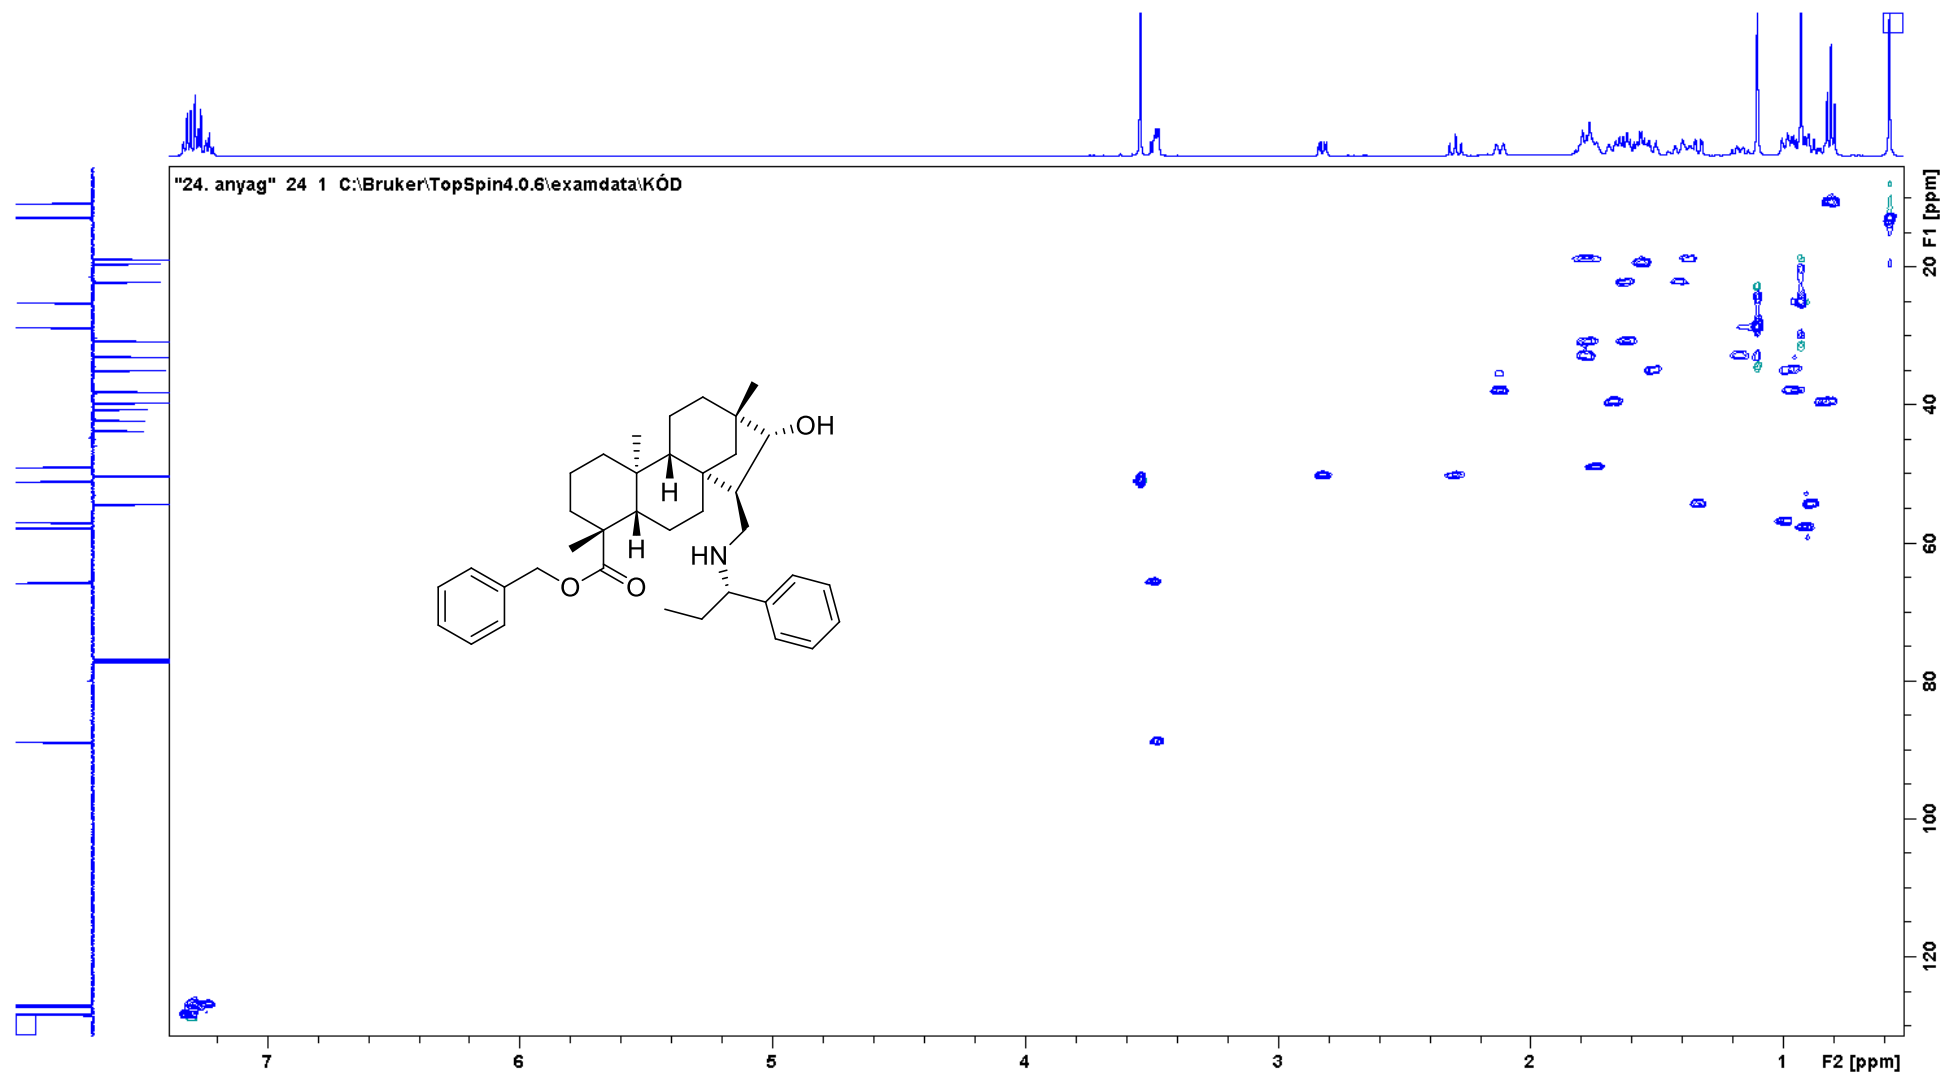

Figure S115

HMBC of compound (4*R*,4*aS*,6*aS*,7*R*,8*R*,9*S*,11*bS*)-Methyl 8-hydroxy-4,9,11*b*-trimethyl-7-((((*R*)-1-phenylpropyl)amino)methyl)tetradecahydro-6*a*,9-methanocyclohepta[*a*]naphthalene-4-carboxylate (**24**):

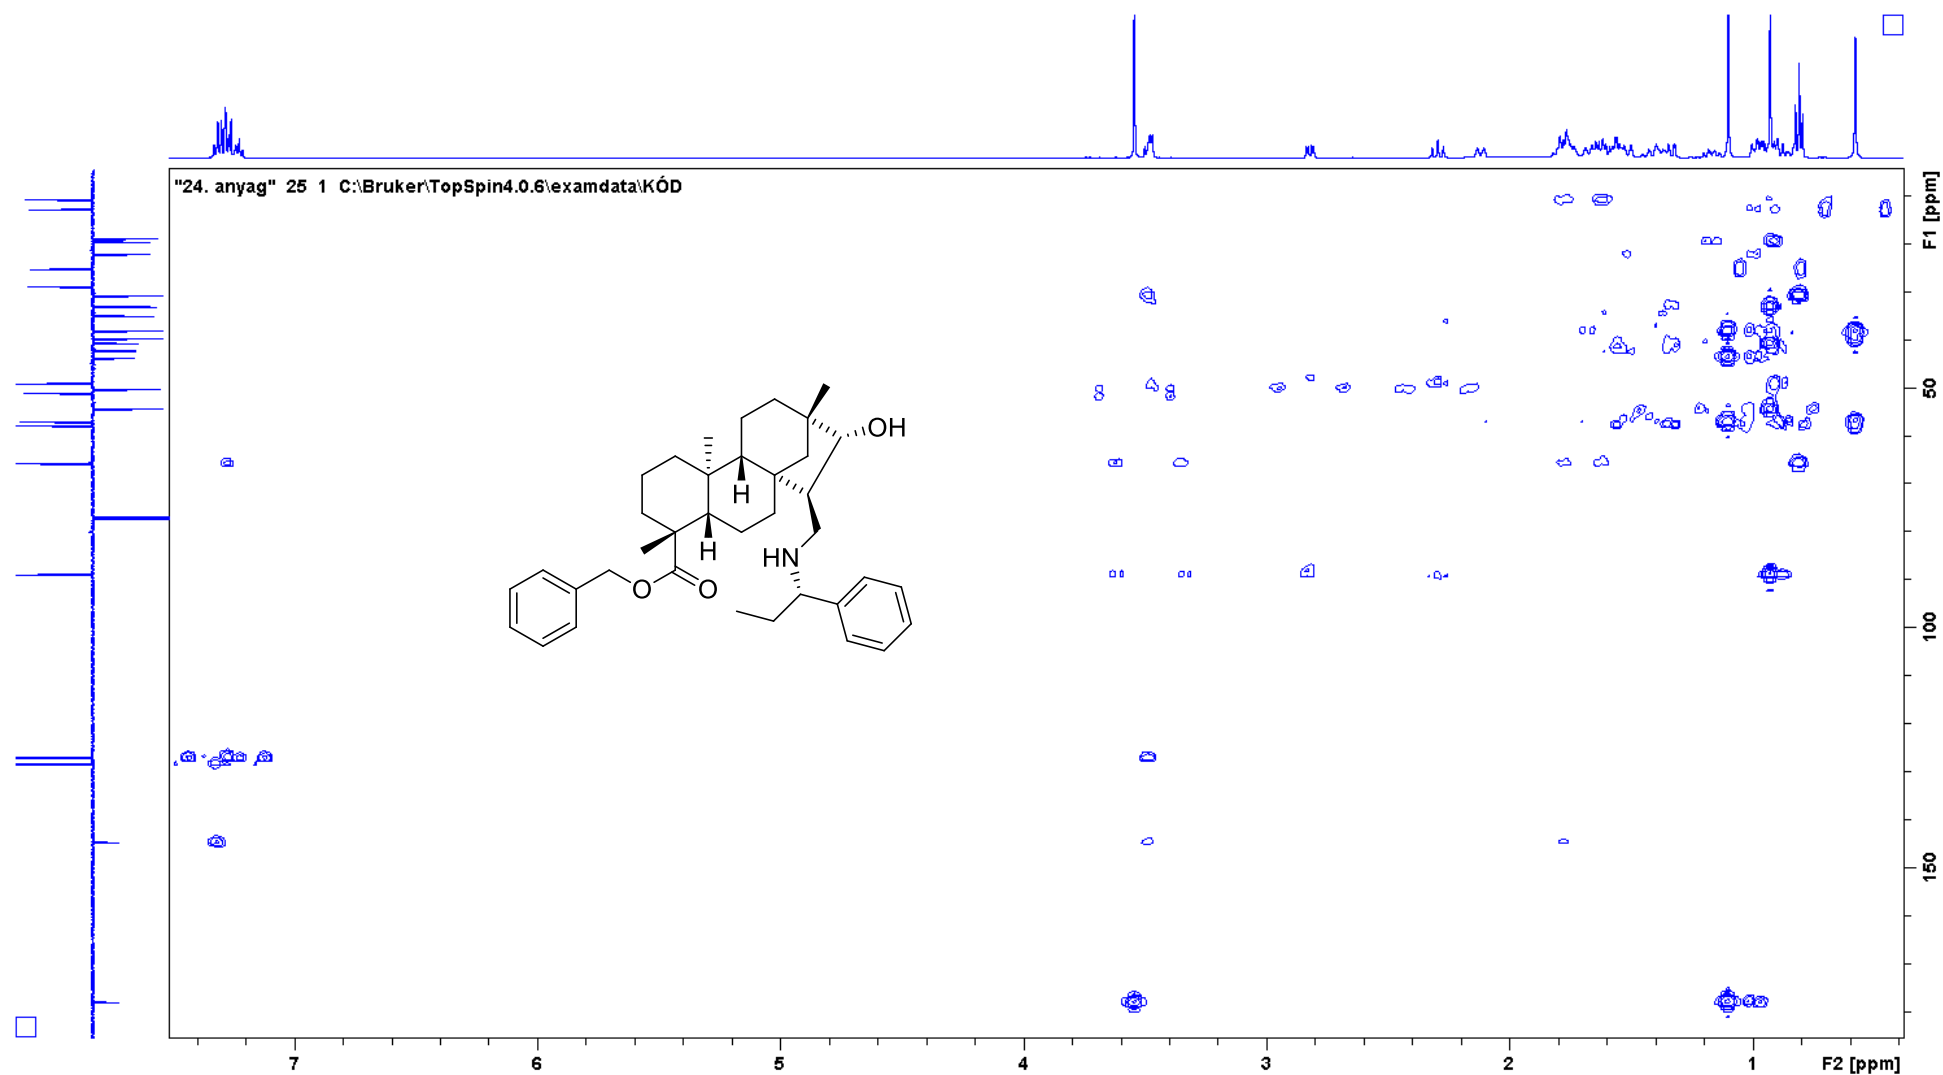

Figure S116

<sup>1</sup>H-NMR of compound (4*R*,4*aS*,6*aS*,7*R*,8*R*,9*S*,11*bS*)-Methyl 8-hydroxy-4,9,11*b*-trimethyl-7-(((*S*)-1-phenylpropyl)amino)methyl)tetradecahydro-6*a*,9-methanocyclohepta[*a*]naphthalene-4-carboxylate (**25**):

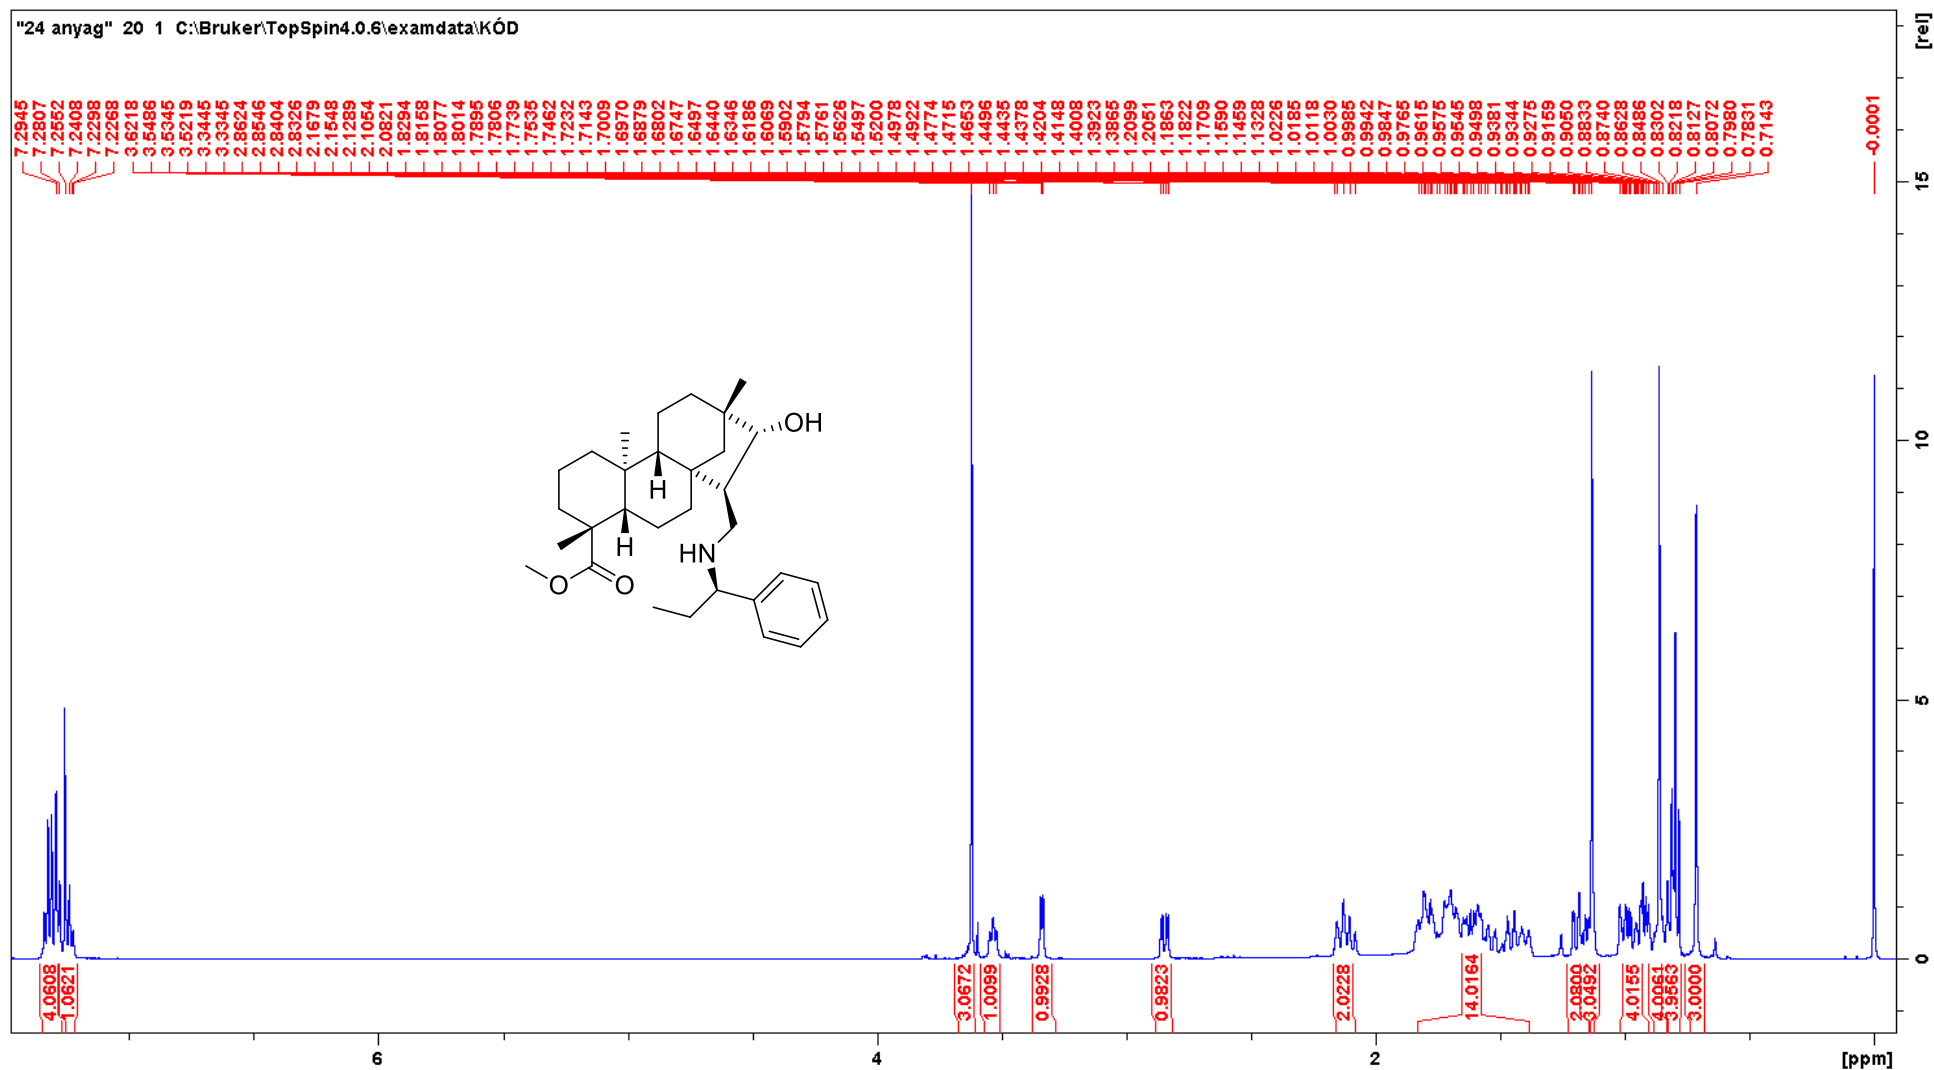

Figure S117

$^{13}\text{C}$ -NMR of compound (4*R*,4*aS*,6*aS*,7*R*,8*R*,9*S*,11*bS*)-Methyl 8-hydroxy-4,9,11*b*-trimethyl-7-(((*S*)-1-phenylpropyl)amino)methyl)tetradecahydro-6*a*,9-methanocyclohepta[*a*]naphthalene-4-carboxylate (**25**):

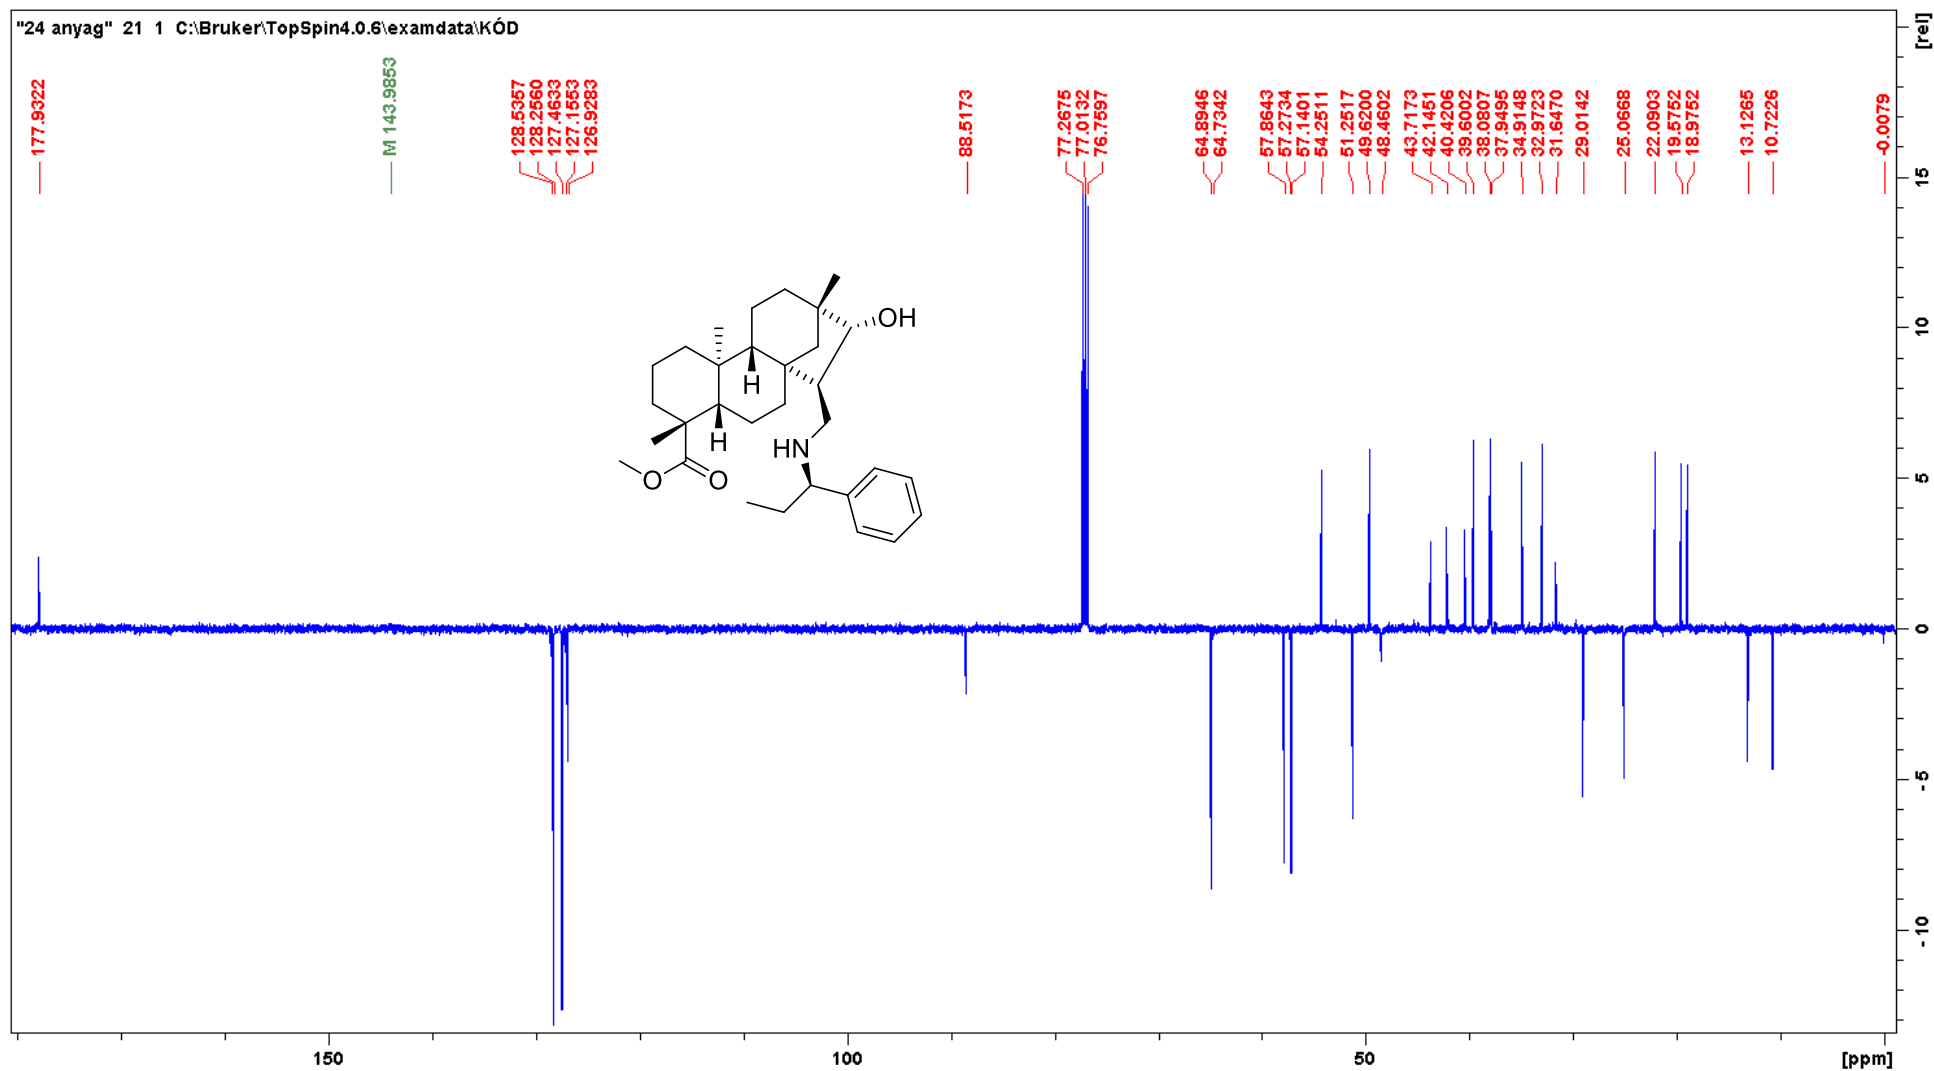



COSY of compound (4*R*,4*aS*,6*aS*,7*R*,8*R*,9*S*,11*bS*)-Methyl 8-hydroxy-4,9,11*b*-trimethyl-7-(((*S*)-1-phenylpropyl)amino)methyl)tetradecahydro-6*a*,9-methanocyclohepta[*a*]naphthalene-4-carboxylate (**25**):

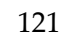

Figure S119

NOESY of compound (4*R*,4*aS*,6*aS*,7*R*,8*R*,9*S*,11*bS*)-Methyl 8-hydroxy-4,9,11*b*-trimethyl-7-(((*S*)-1-phenylpropyl)amino)methyl)tetradecahydro-6*a*,9-methanocyclohepta[*a*]naphthalene-4-carboxylate (**25**):

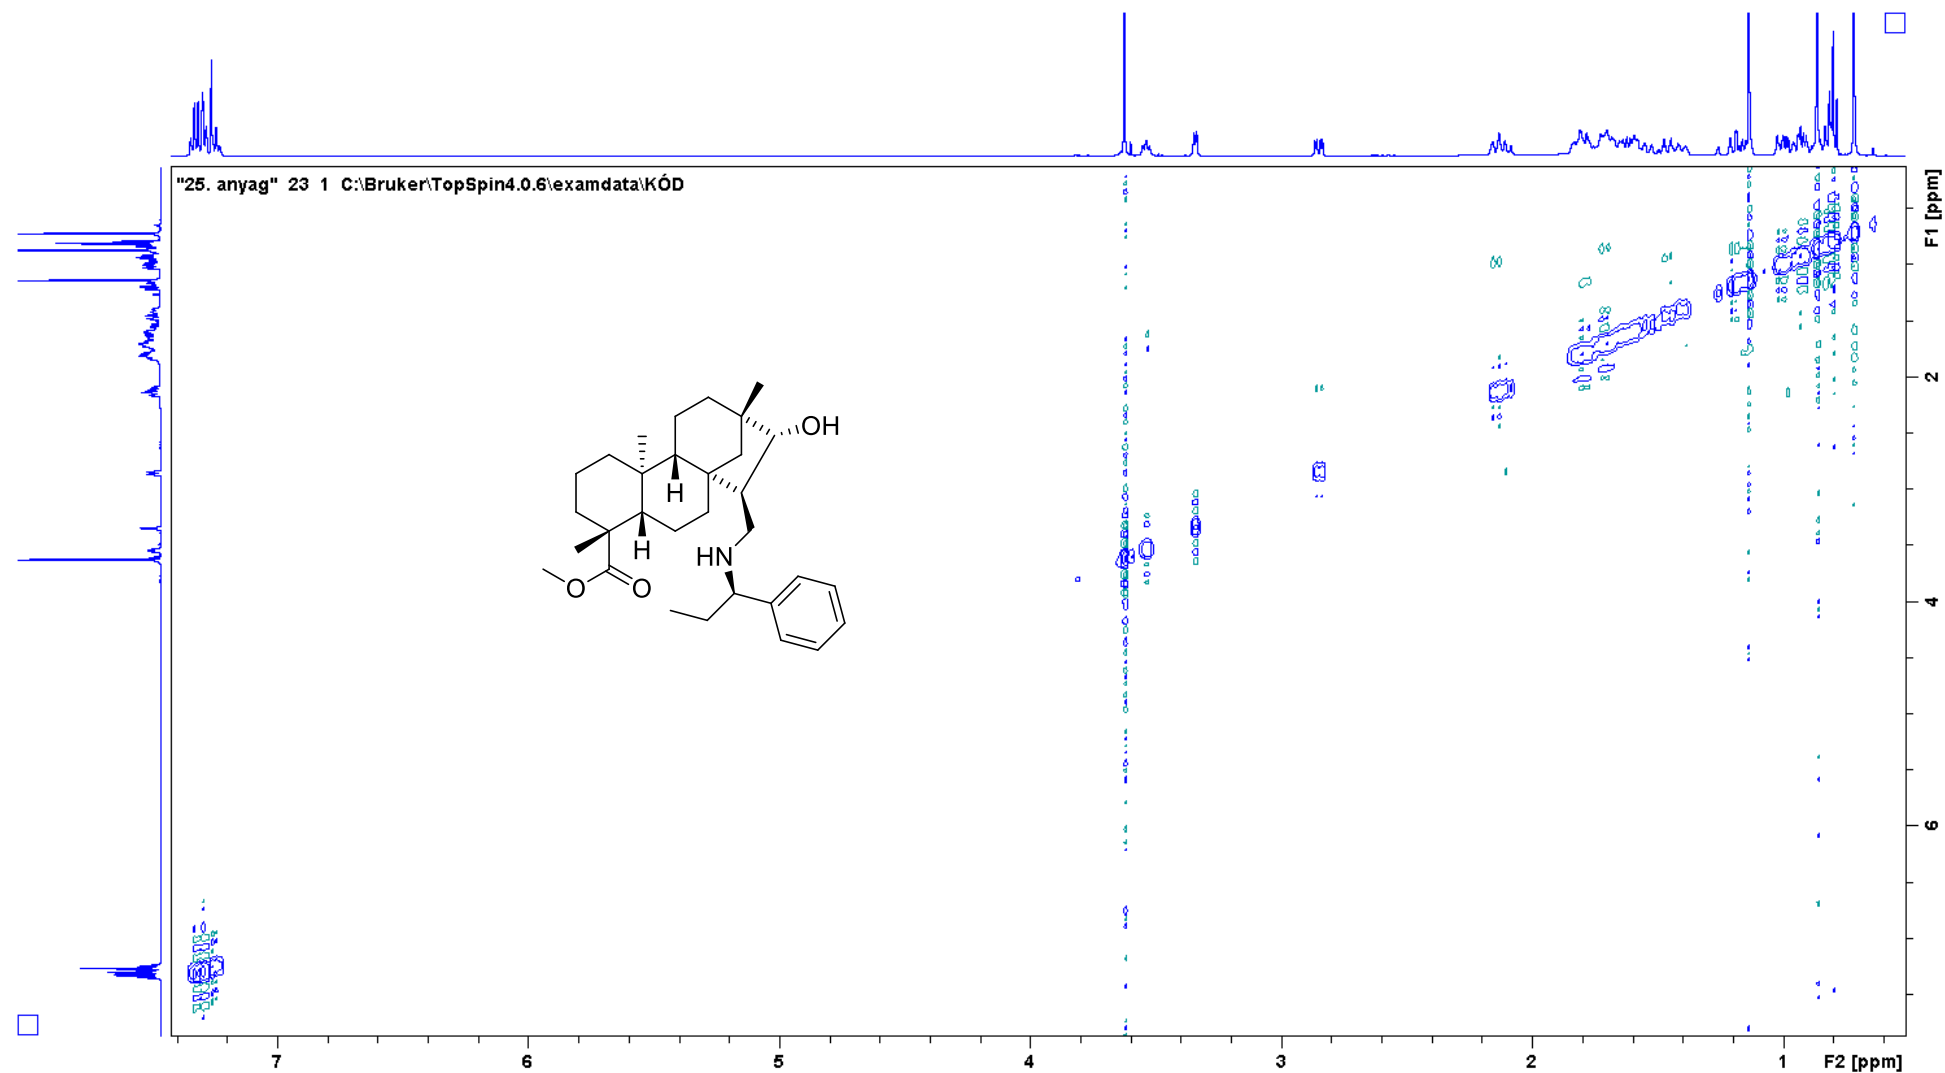

Figure S120

HSQC of compound (4*R*,4*aS*,6*aS*,7*R*,8*R*,9*S*,11*bS*)-Methyl 8-hydroxy-4,9,11*b*-trimethyl-7-(((*S*)-1-phenylpropyl)amino)methyl)tetradecahydro-6*a*,9-methanocyclohepta[*a*]naphthalene-4-carboxylate (**25**):

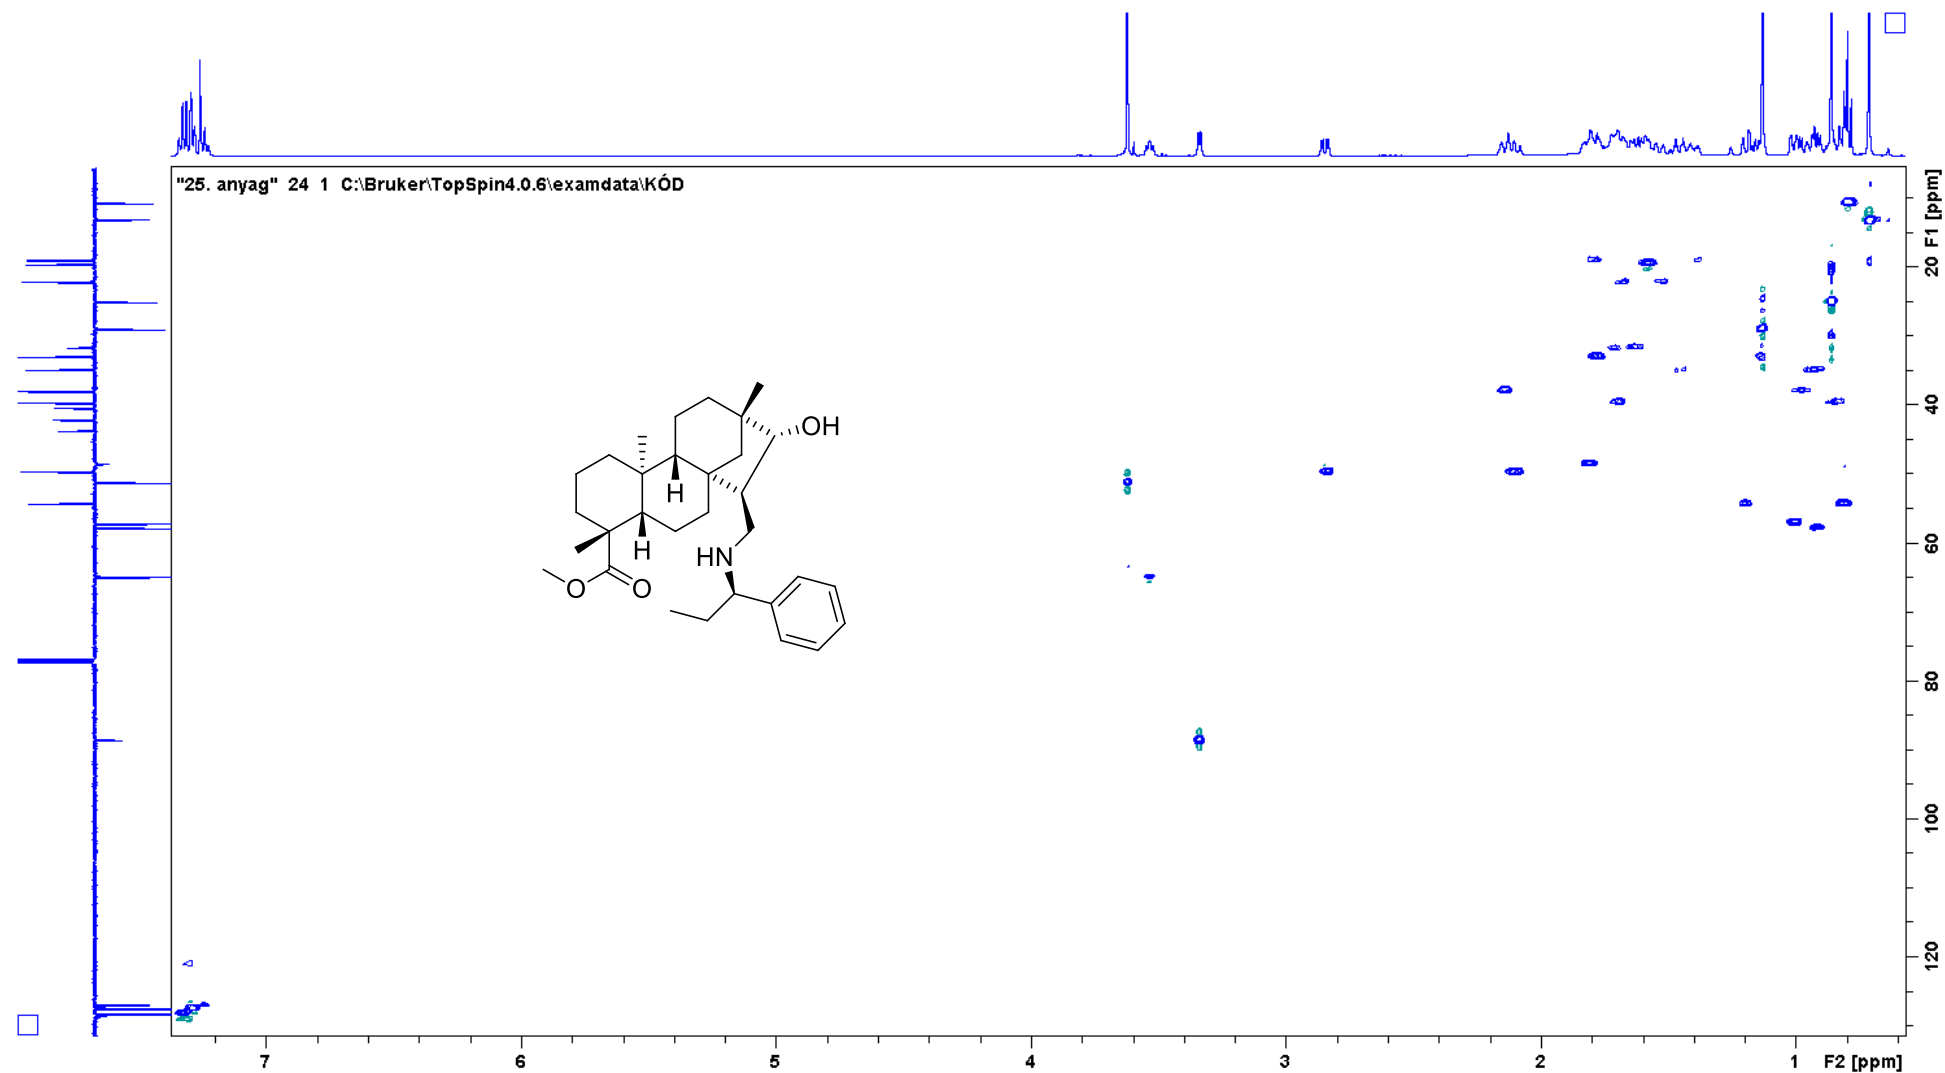

Figure S121

HMBC of compound (4*R*,4*aS*,6*aS*,7*R*,8*R*,9*S*,11*bS*)-Methyl 8-hydroxy-4,9,11*b*-trimethyl-7-(((*S*)-1-phenylpropyl)amino)methyl)tetradecahydro-6*a*,9-methanocyclohepta[*a*]naphthalene-4-carboxylate (**25**):

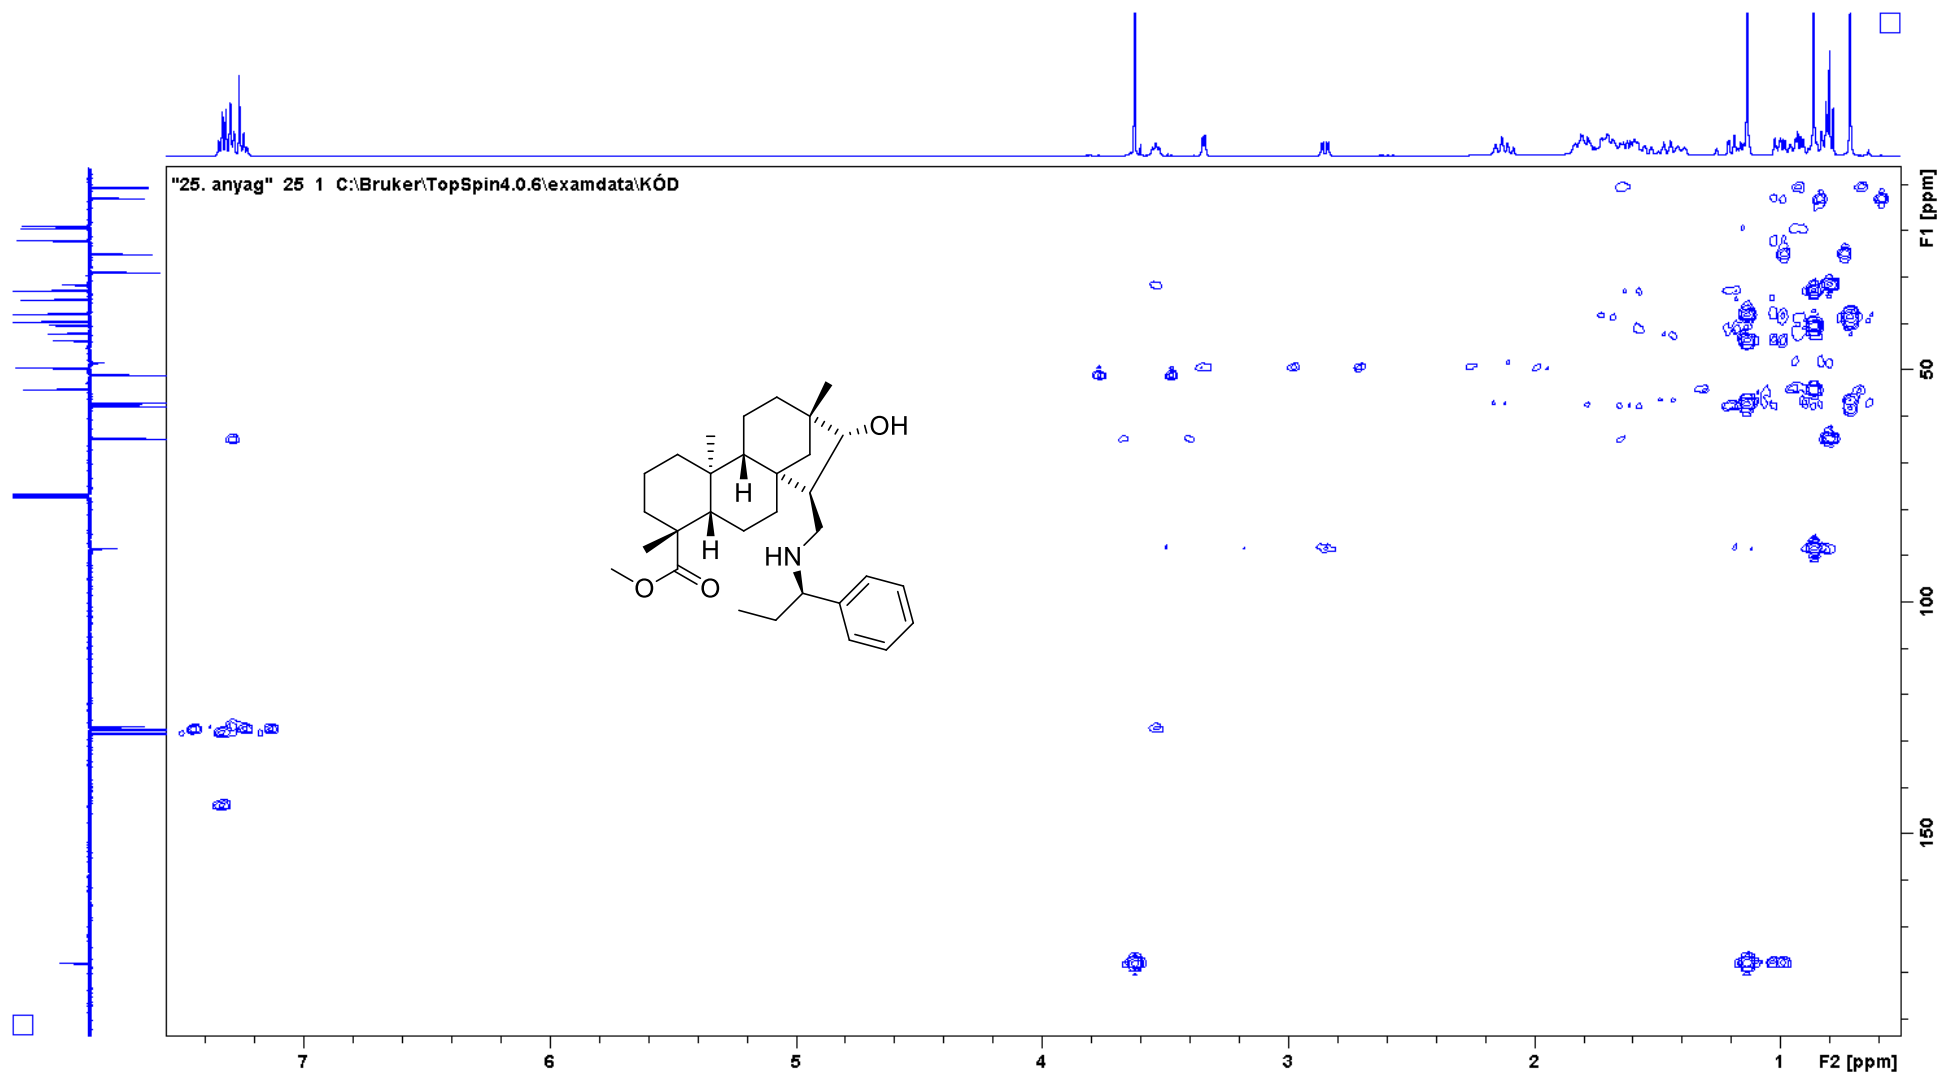

Figure S122

<sup>1</sup>H-NMR of compound (4*R*,4*aS*,6*aS*,7*R*,8*R*,9*S*,11*bS*)-Methyl 8-hydroxy-4,9,11*b*-trimethyl-7-(((*S*)-1-(naphthalen-2-yl)ethyl)amino)methyl)tetradecahydro-6*a*,9-methanocyclohepta[*a*]naphthalene-4-carboxylate (**26**):

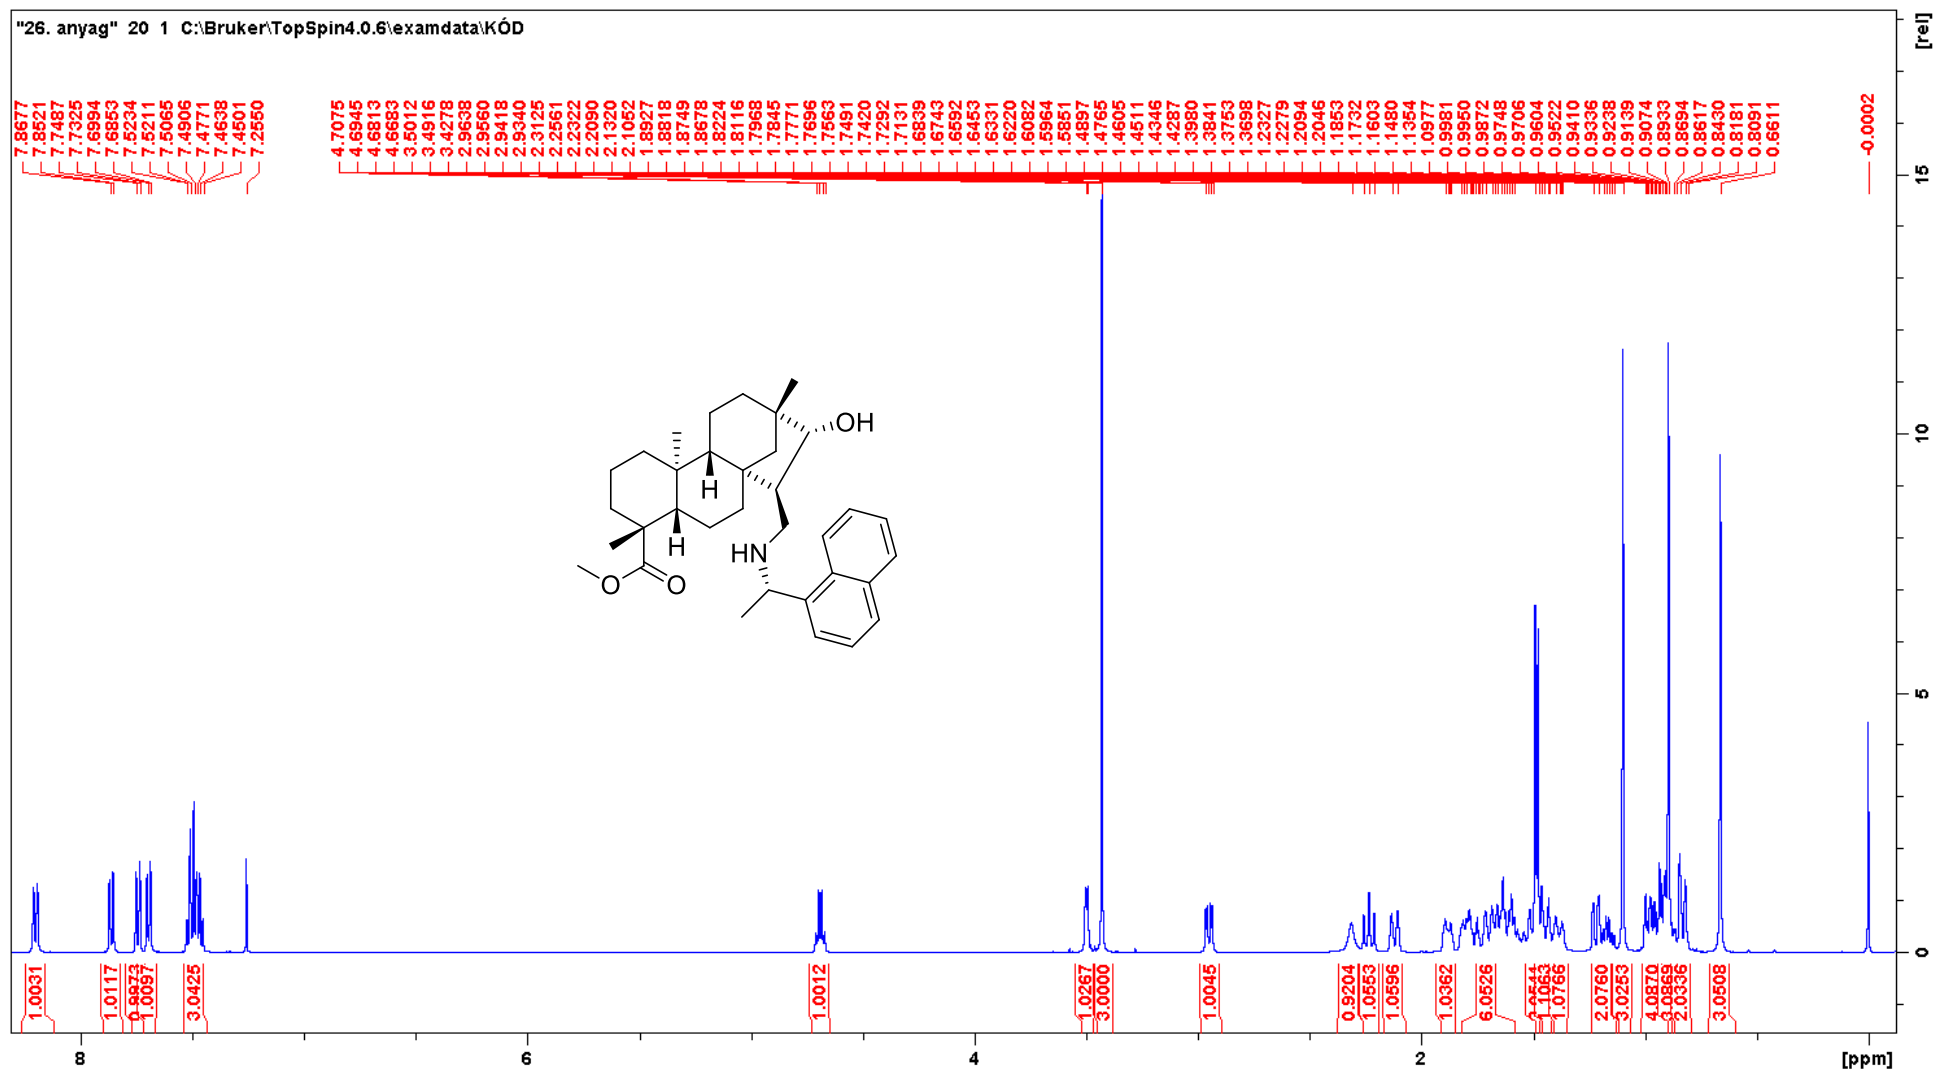

Figure S123

$^{13}\text{C}$ -NMR of compound (4*R*,4*aS*,6*aS*,7*R*,8*R*,9*S*,11*bS*)-Methyl 8-hydroxy-4,9,11*b*-trimethyl-7-(((*S*)-1-(naphthalen-2-yl)ethyl)amino)methyl)tetrahydro-6*a*,9-methanocyclohepta[*a*]naphthalene-4-carboxylate (**26**):

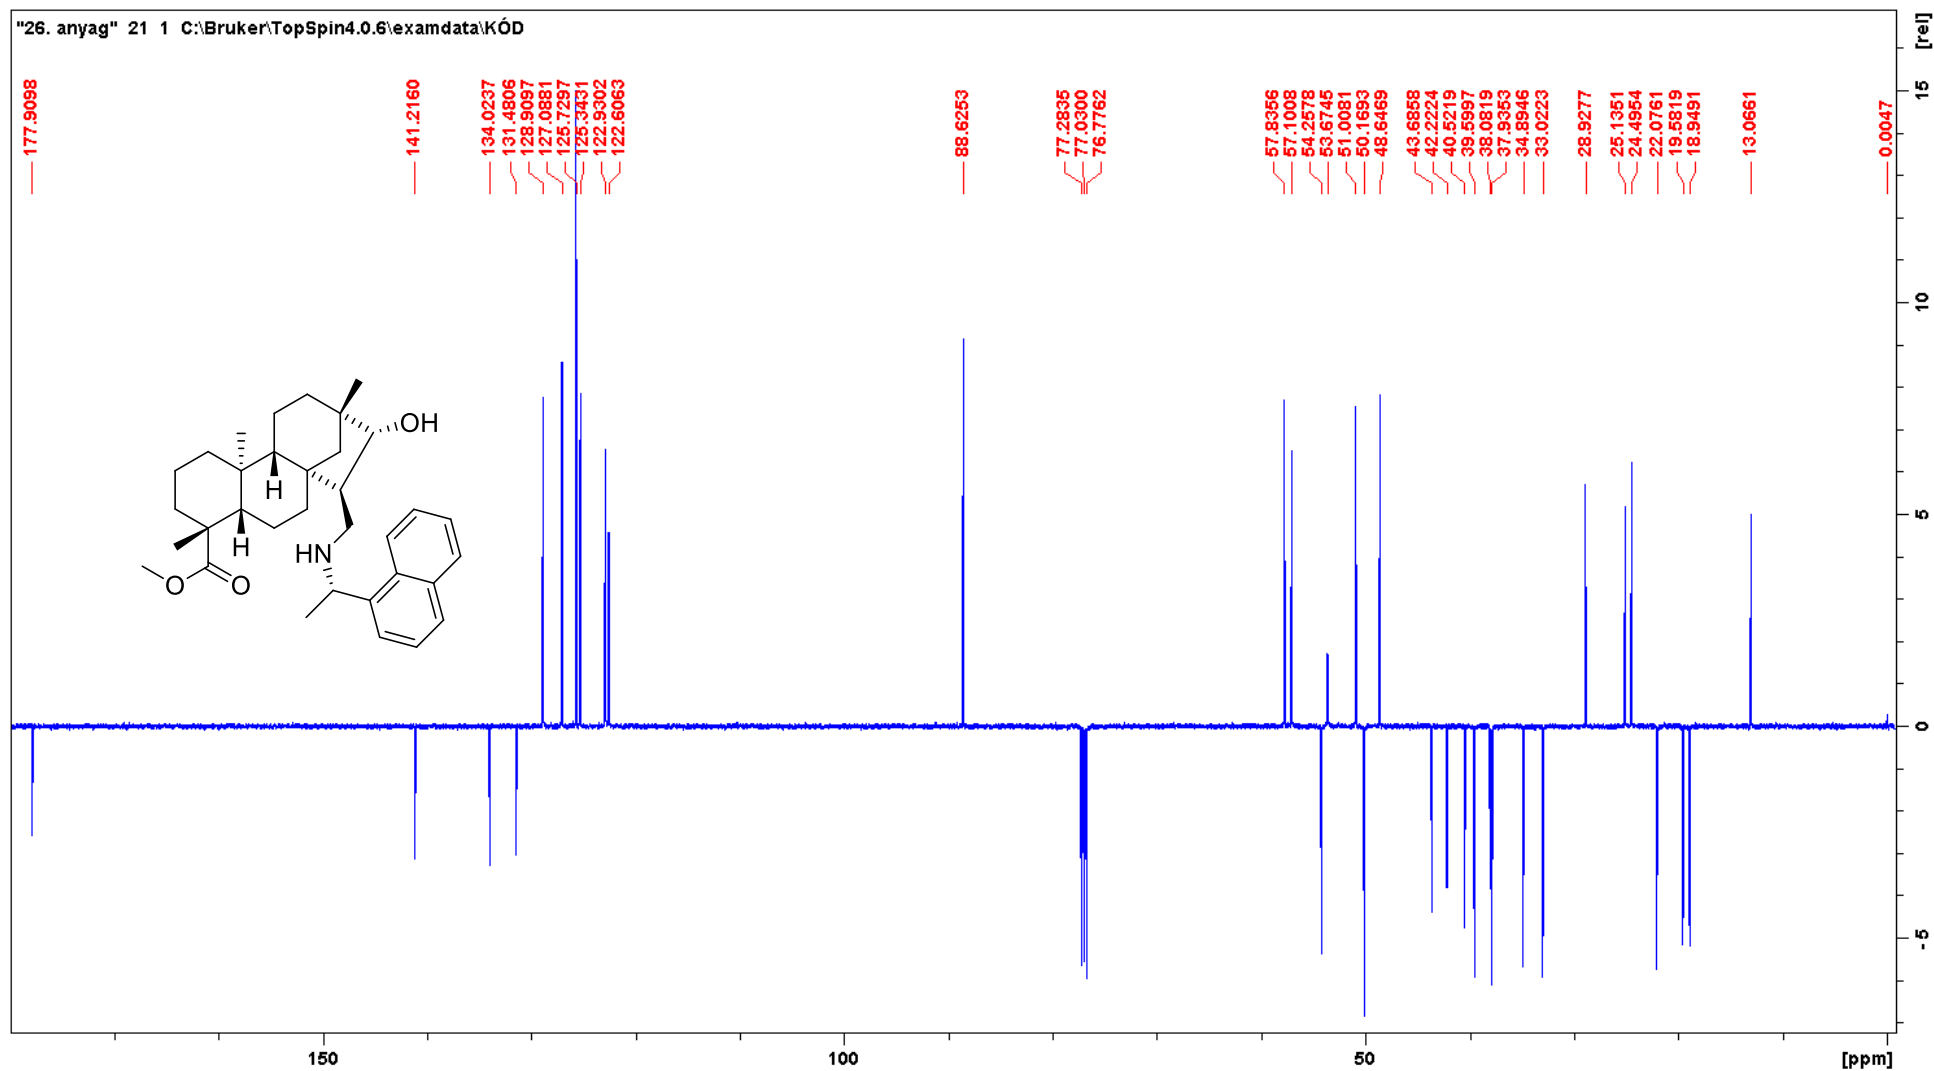

Figure S124

COSY of compound (4*R*,4*aS*,6*aS*,7*R*,8*R*,9*S*,11*bS*)-Methyl 8-hydroxy-4,9,11*b*-trimethyl-7-(((*S*)-1-(naphthalen-2-yl)ethyl)amino)methyl)tetradecahydro-6*a*,9-methanocyclohepta[*a*]naphthalene-4-carboxylate (**26**):

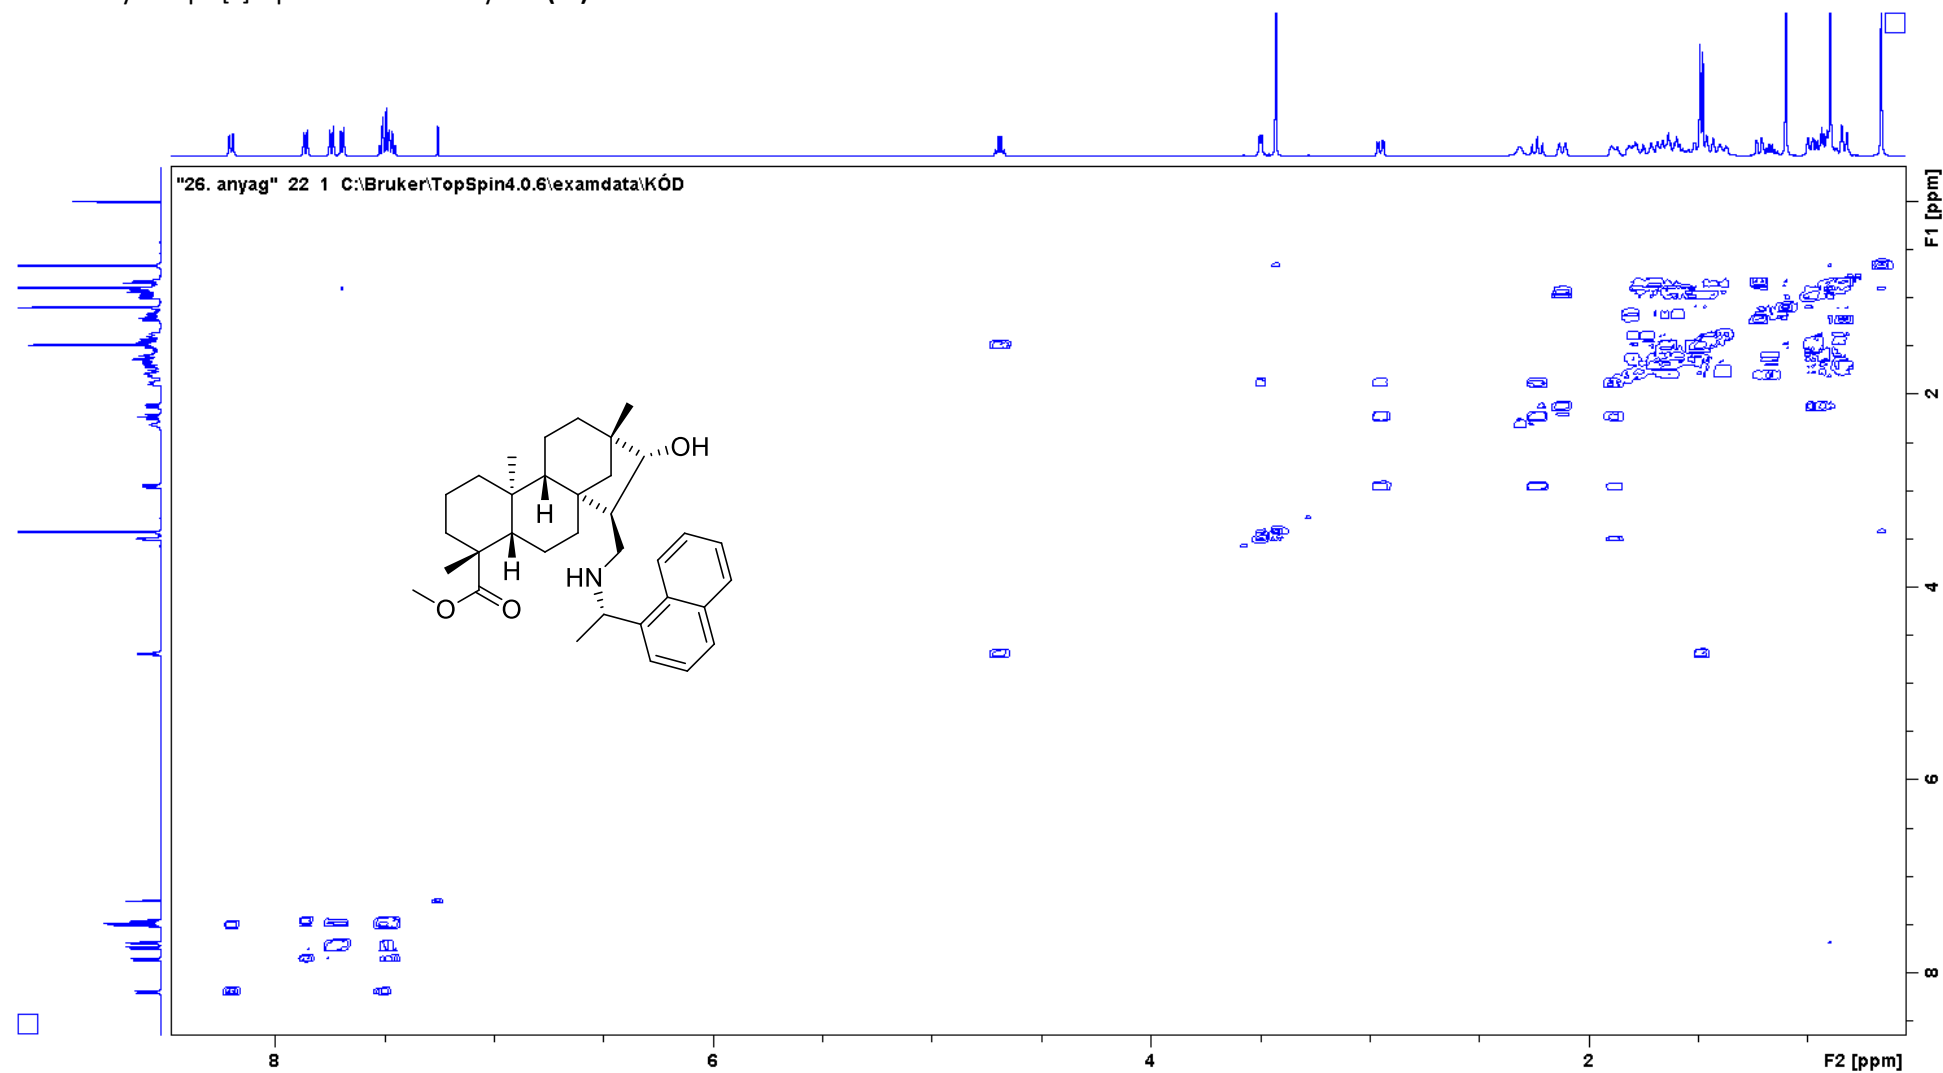

Figure S125

NOESY of compound (4*R*,4*aS*,6*aS*,7*R*,8*R*,9*S*,11*bS*)-Methyl 8-hydroxy-4,9,11*b*-trimethyl-7-(((*S*)-1-(naphthalen-2-yl)ethyl)amino)methyl)tetradecahydro-6*a*,9-methanocyclohepta[*a*]naphthalene-4-carboxylate (**26**):

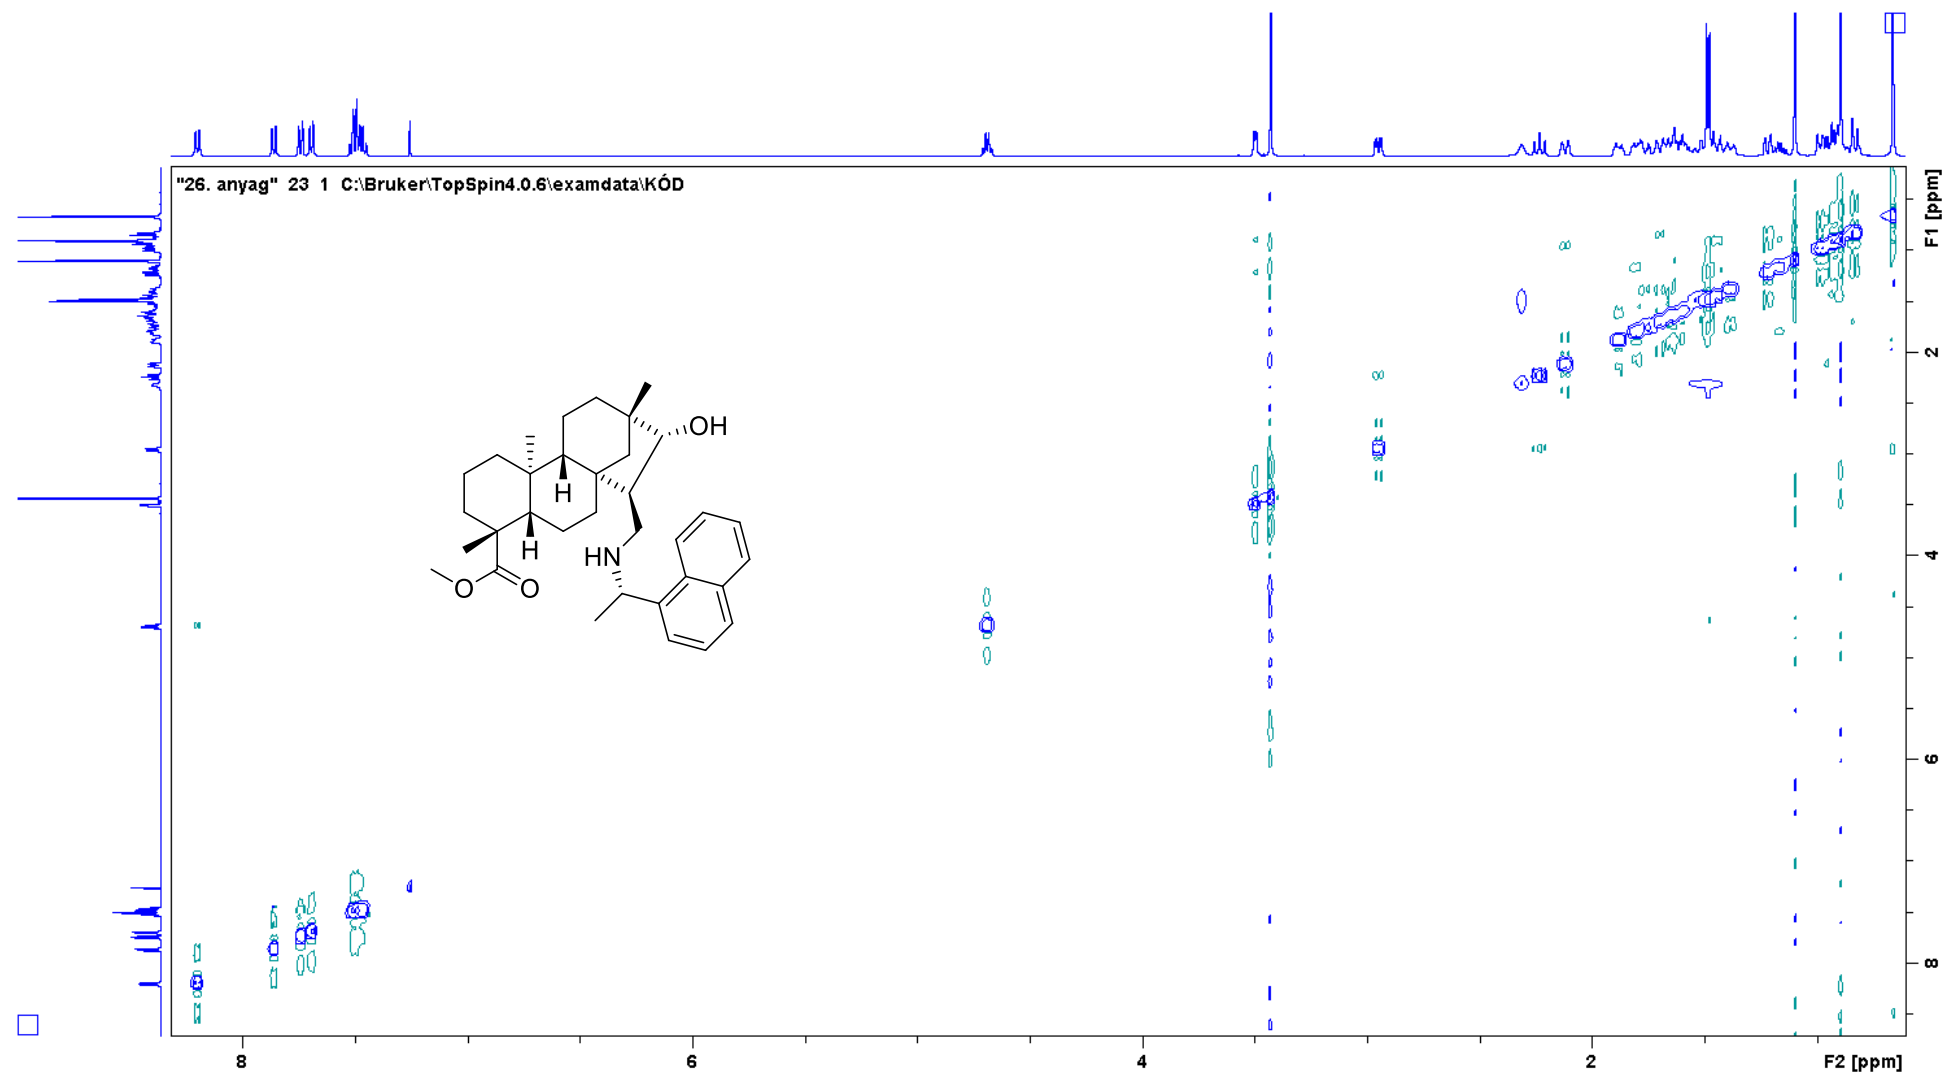



Figure S126

HSQC of compound (4*R*,4*aS*,6*aS*,7*R*,8*R*,9*S*,11*bS*)-Methyl 8-hydroxy-4,9,11*b*-trimethyl-7-(((*S*)-1-(naphthalen-2-yl)ethyl)amino)methyl)tetradecahydro-6*a*,9-methanocyclohepta[*a*]naphthalene-4-carboxylate (**26**):

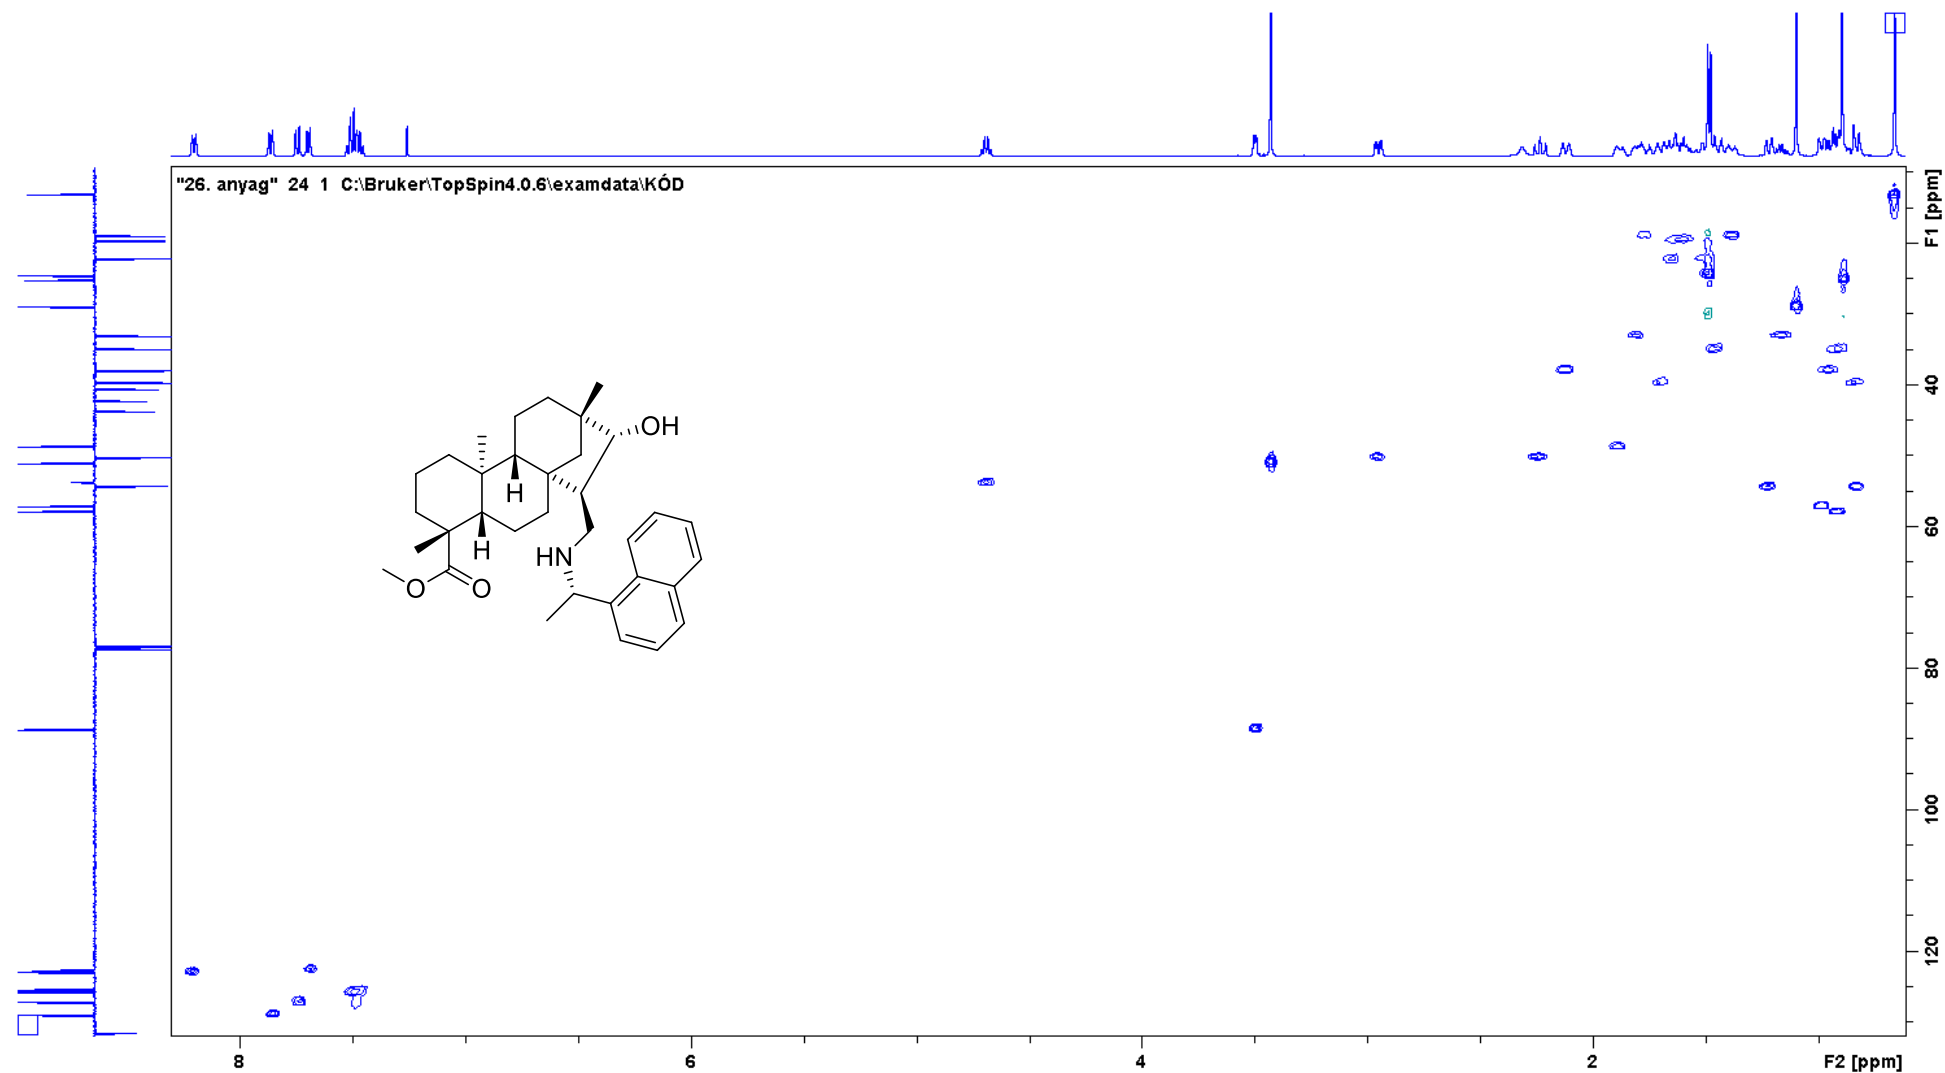

Figure S127

HMBC of compound (4*R*,4*aS*,6*aS*,7*R*,8*R*,9*S*,11*bS*)-Methyl 8-hydroxy-4,9,11*b*-trimethyl-7-(((*S*)-1-(naphthalen-2-yl)ethyl)amino)methyl)tetradecahydro-6*a*,9-methanocyclohepta[*a*]naphthalene-4-carboxylate (**26**):

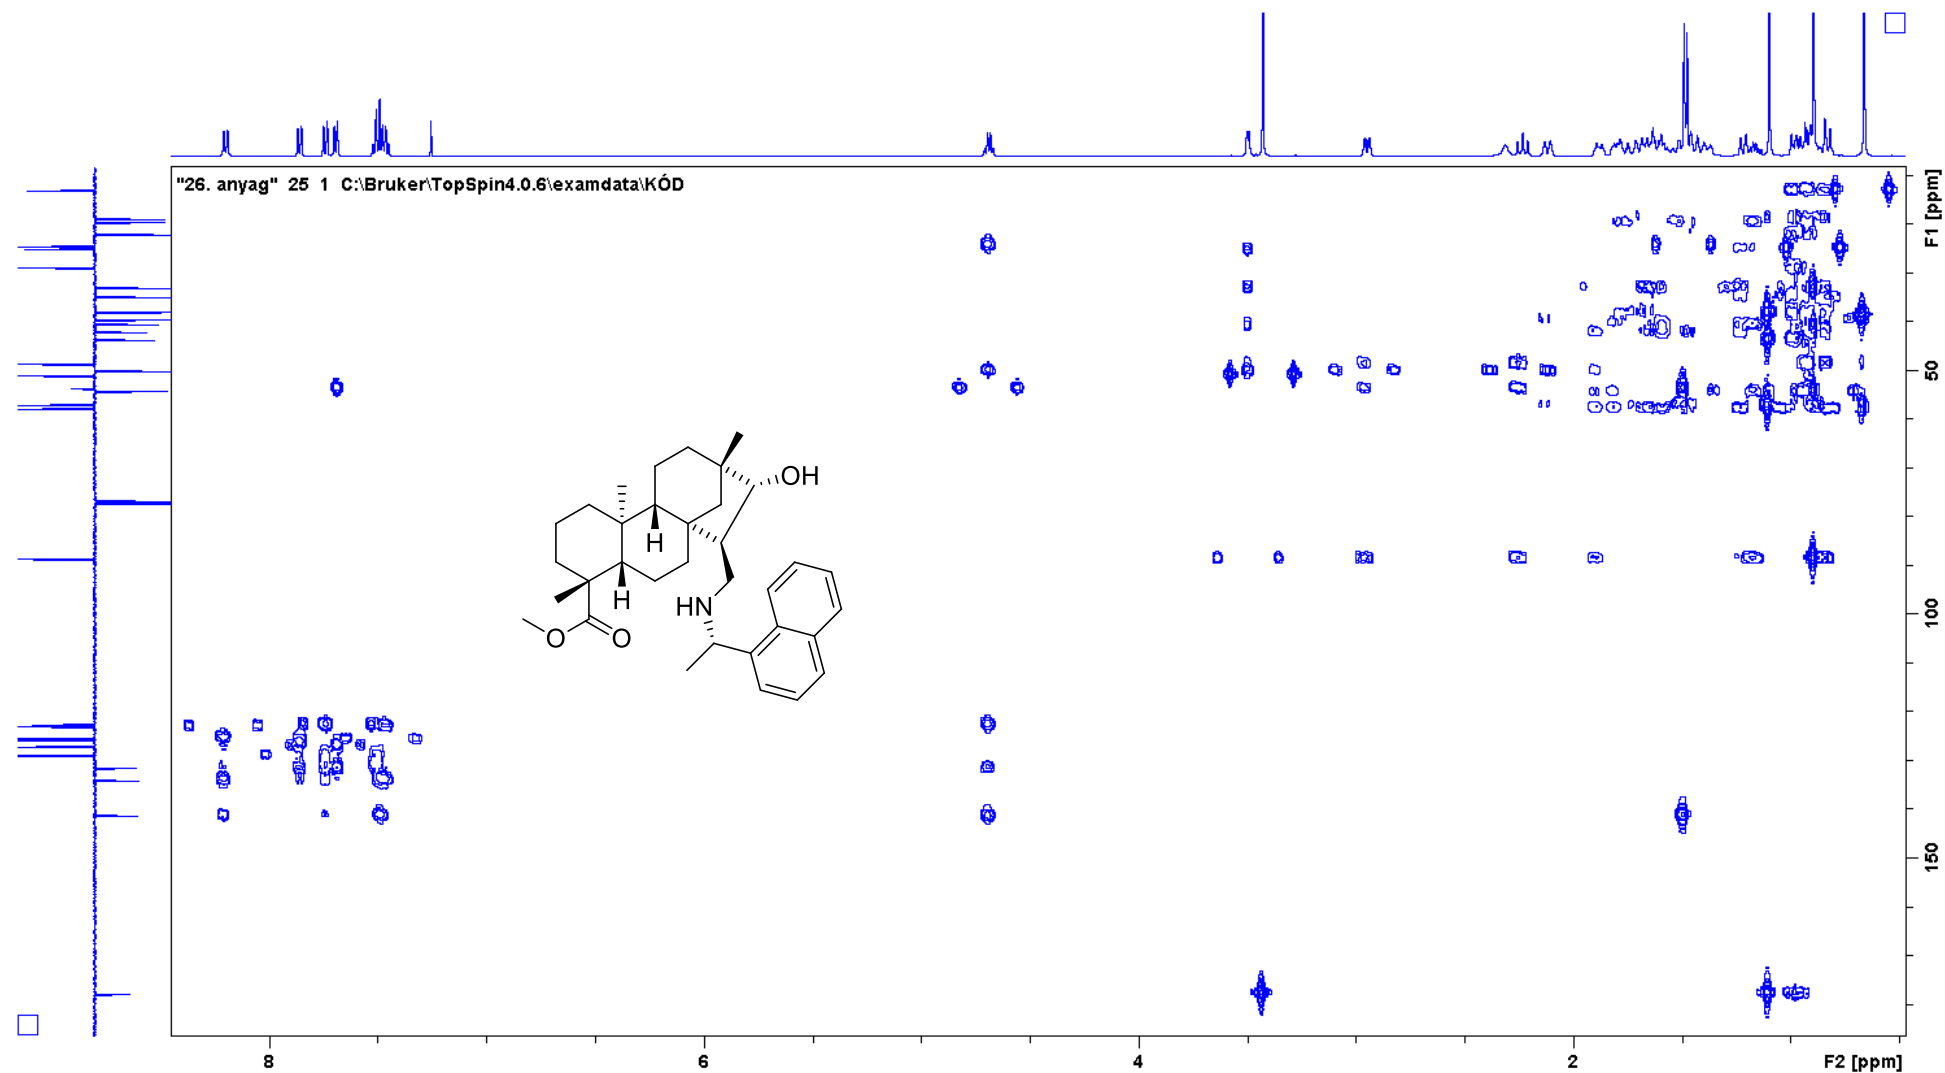

Figure S128

<sup>1</sup>H-NMR of compound (4*R*,4*aS*,6*aS*,7*R*,8*R*,9*S*,11*bS*)-Methyl 8-hydroxy-4,9,11*b*-trimethyl-7-(((*R*)-1-(naphthalen-2-yl)ethyl)amino)methyl)tetradecahydro-6*a*,9-methanocyclohepta[*a*]naphthalene-4-carboxylate (**27**):

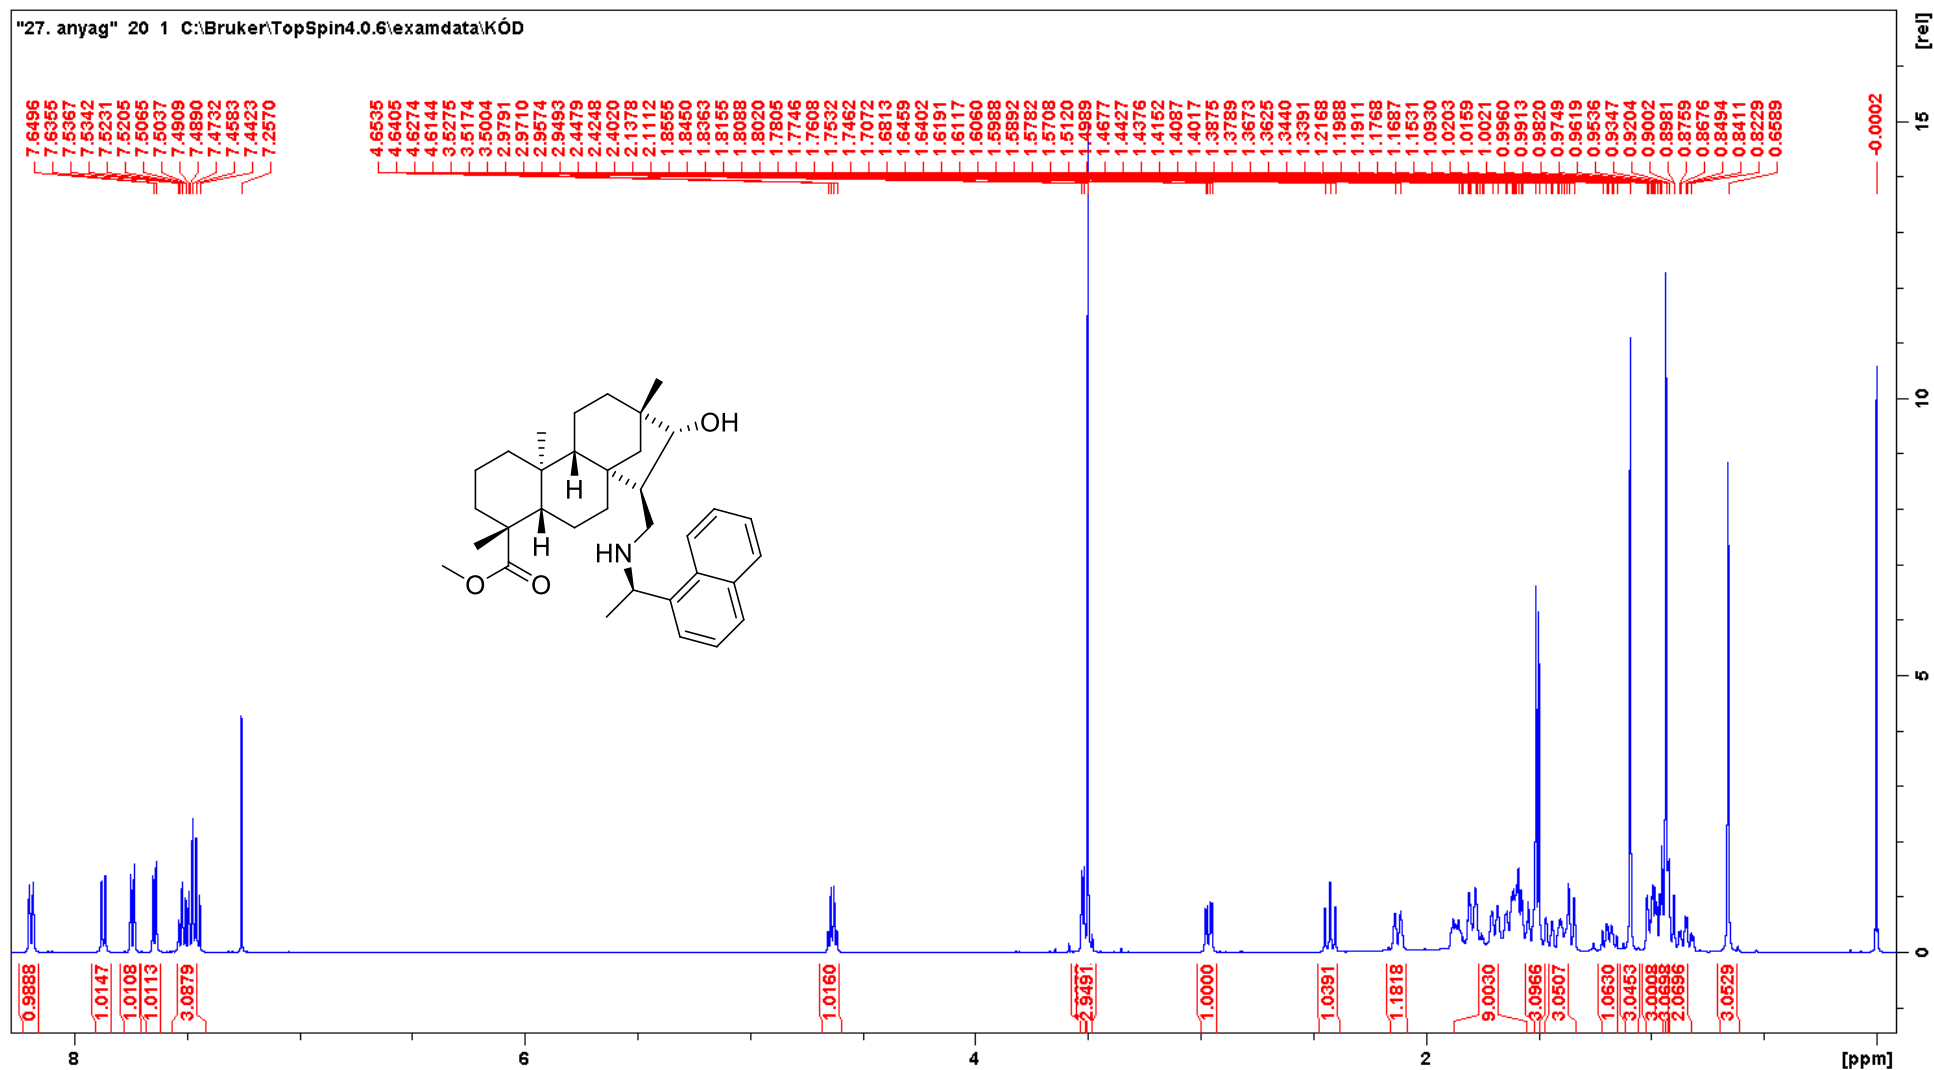

Figure S129

$^{13}\text{C}$ -NMR of compound (4*R*,4*aS*,6*aS*,7*R*,8*R*,9*S*,11*bS*)-Methyl 8-hydroxy-4,9,11*b*-trimethyl-7-(((*R*)-1-(naphthalen-2-yl)ethyl)amino)methyl)tetradecahydro-6*a*,9-methanocyclohepta[*a*]naphthalene-4-carboxylate (**27**):

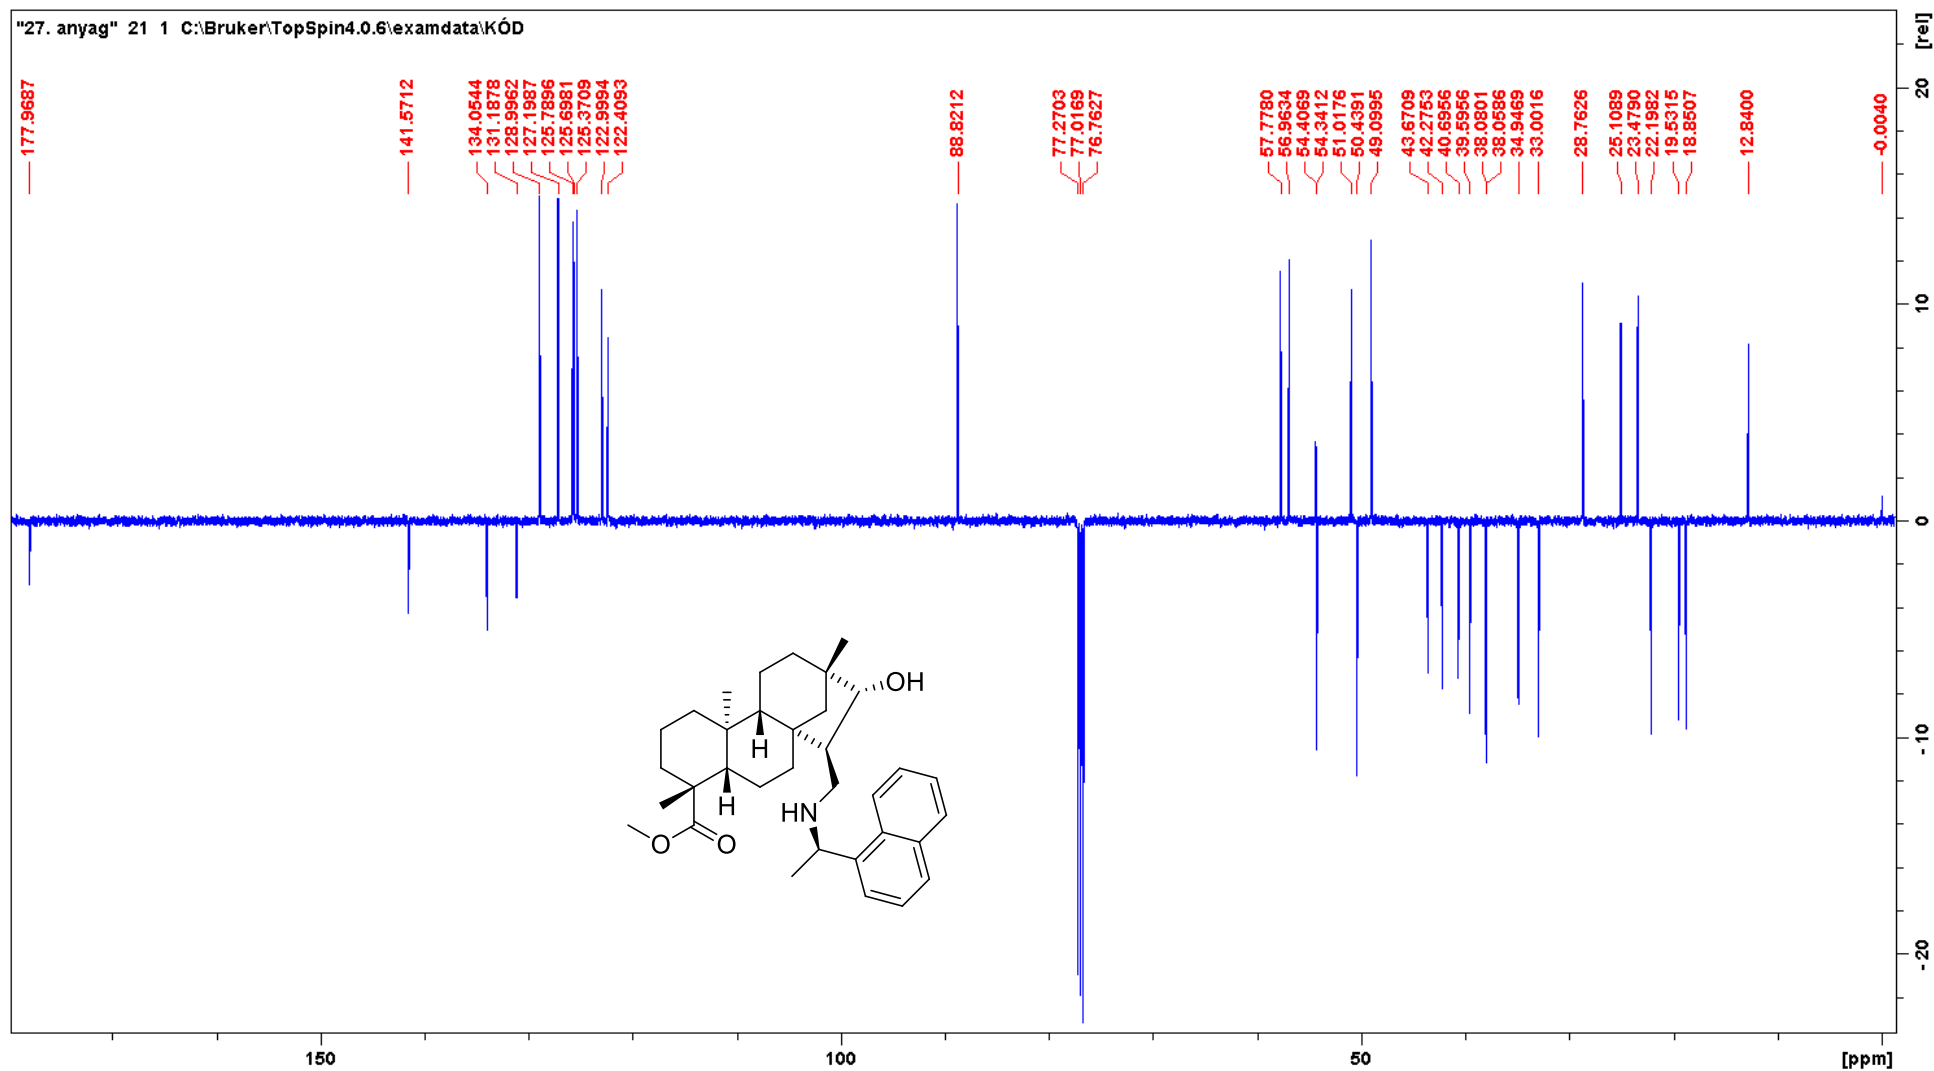

Figure S130

COSY of compound (4*R*,4*aS*,6*aS*,7*R*,8*R*,9*S*,11*bS*)-Methyl 8-hydroxy-4,9,11*b*-trimethyl-7-(((*R*)-1-(naphthalen-2-yl)ethyl)amino)methyl)tetradecahydro-6*a*,9-methanocyclohepta[*a*]naphthalene-4-carboxylate (**27**):

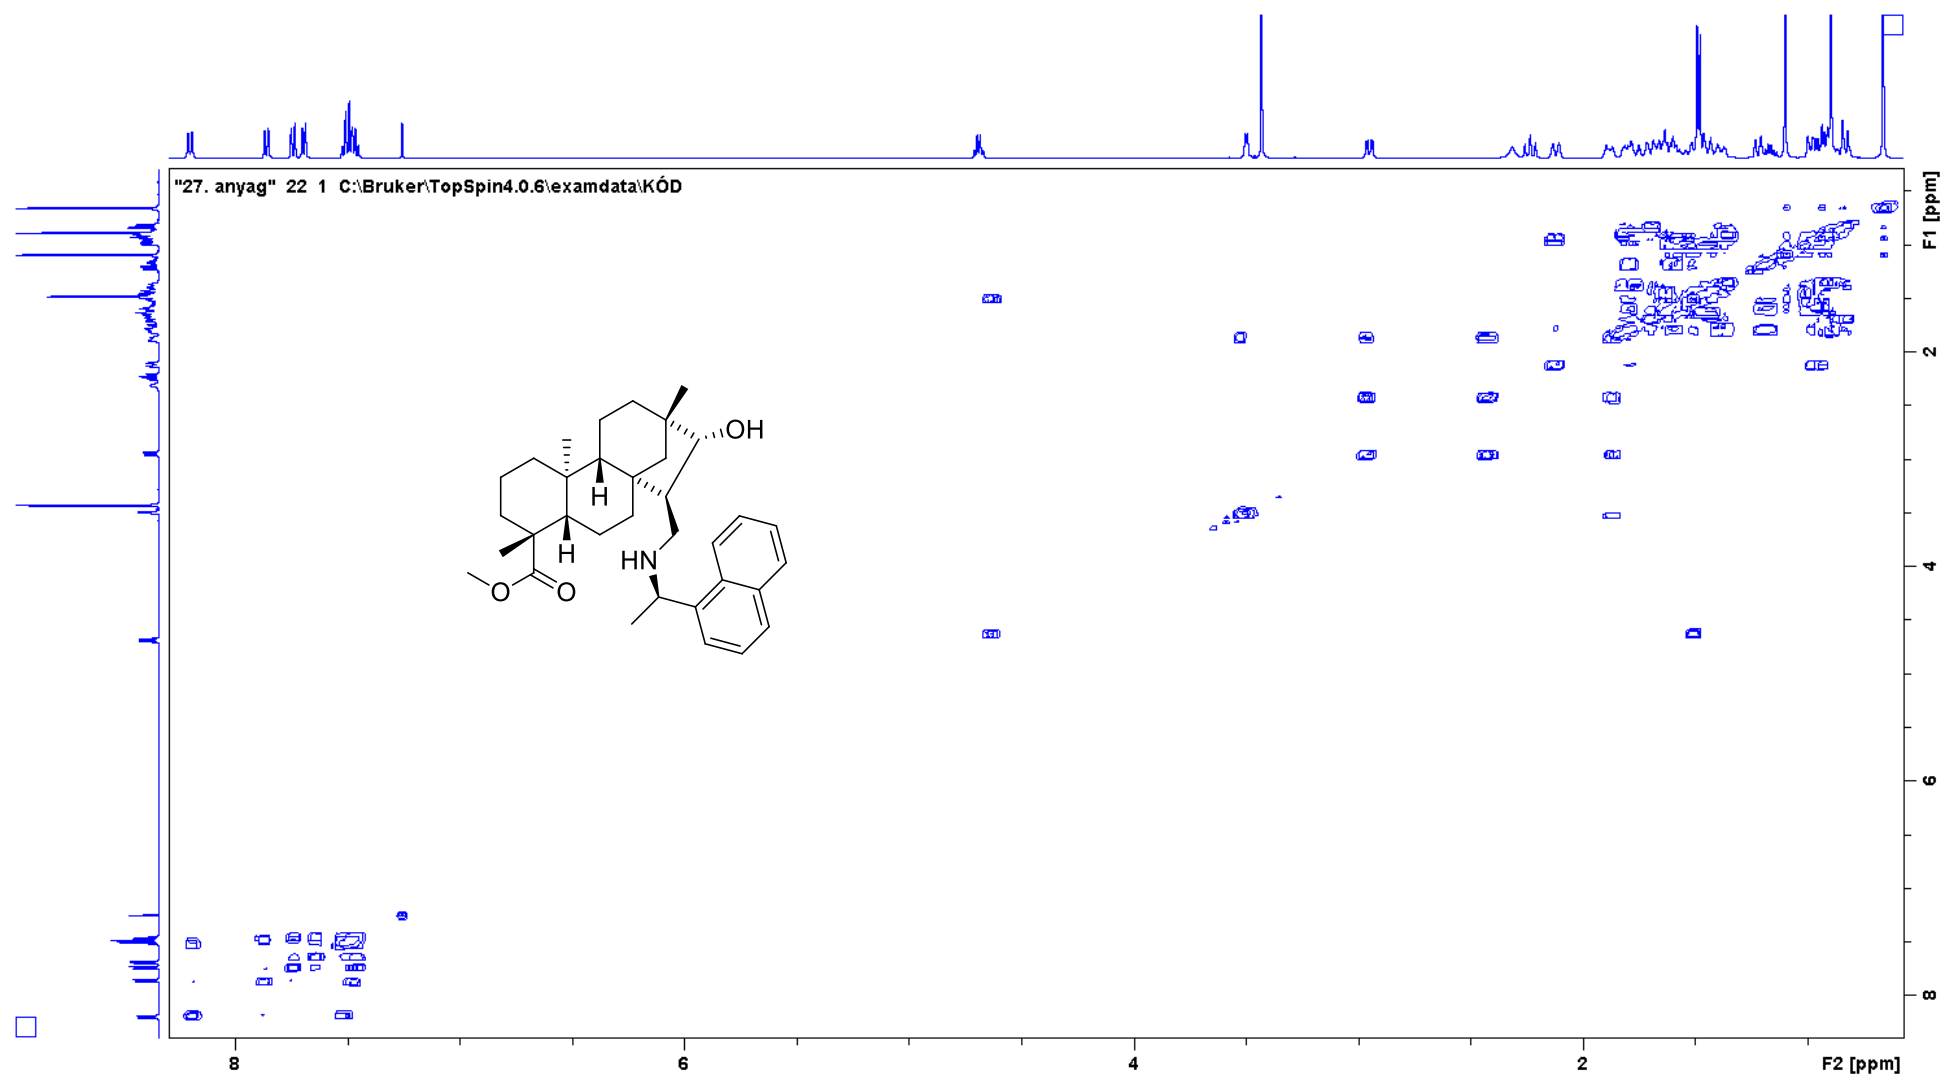

Figure S131

NOESY of compound (4*R*,4*aS*,6*aS*,7*R*,8*R*,9*S*,11*bS*)-Methyl 8-hydroxy-4,9,11*b*-trimethyl-7-(((*R*)-1-(naphthalen-2-yl)ethyl)amino)methyl)tetradecahydro-6*a*,9-methanocyclohepta[*a*]naphthalene-4-carboxylate (**27**):

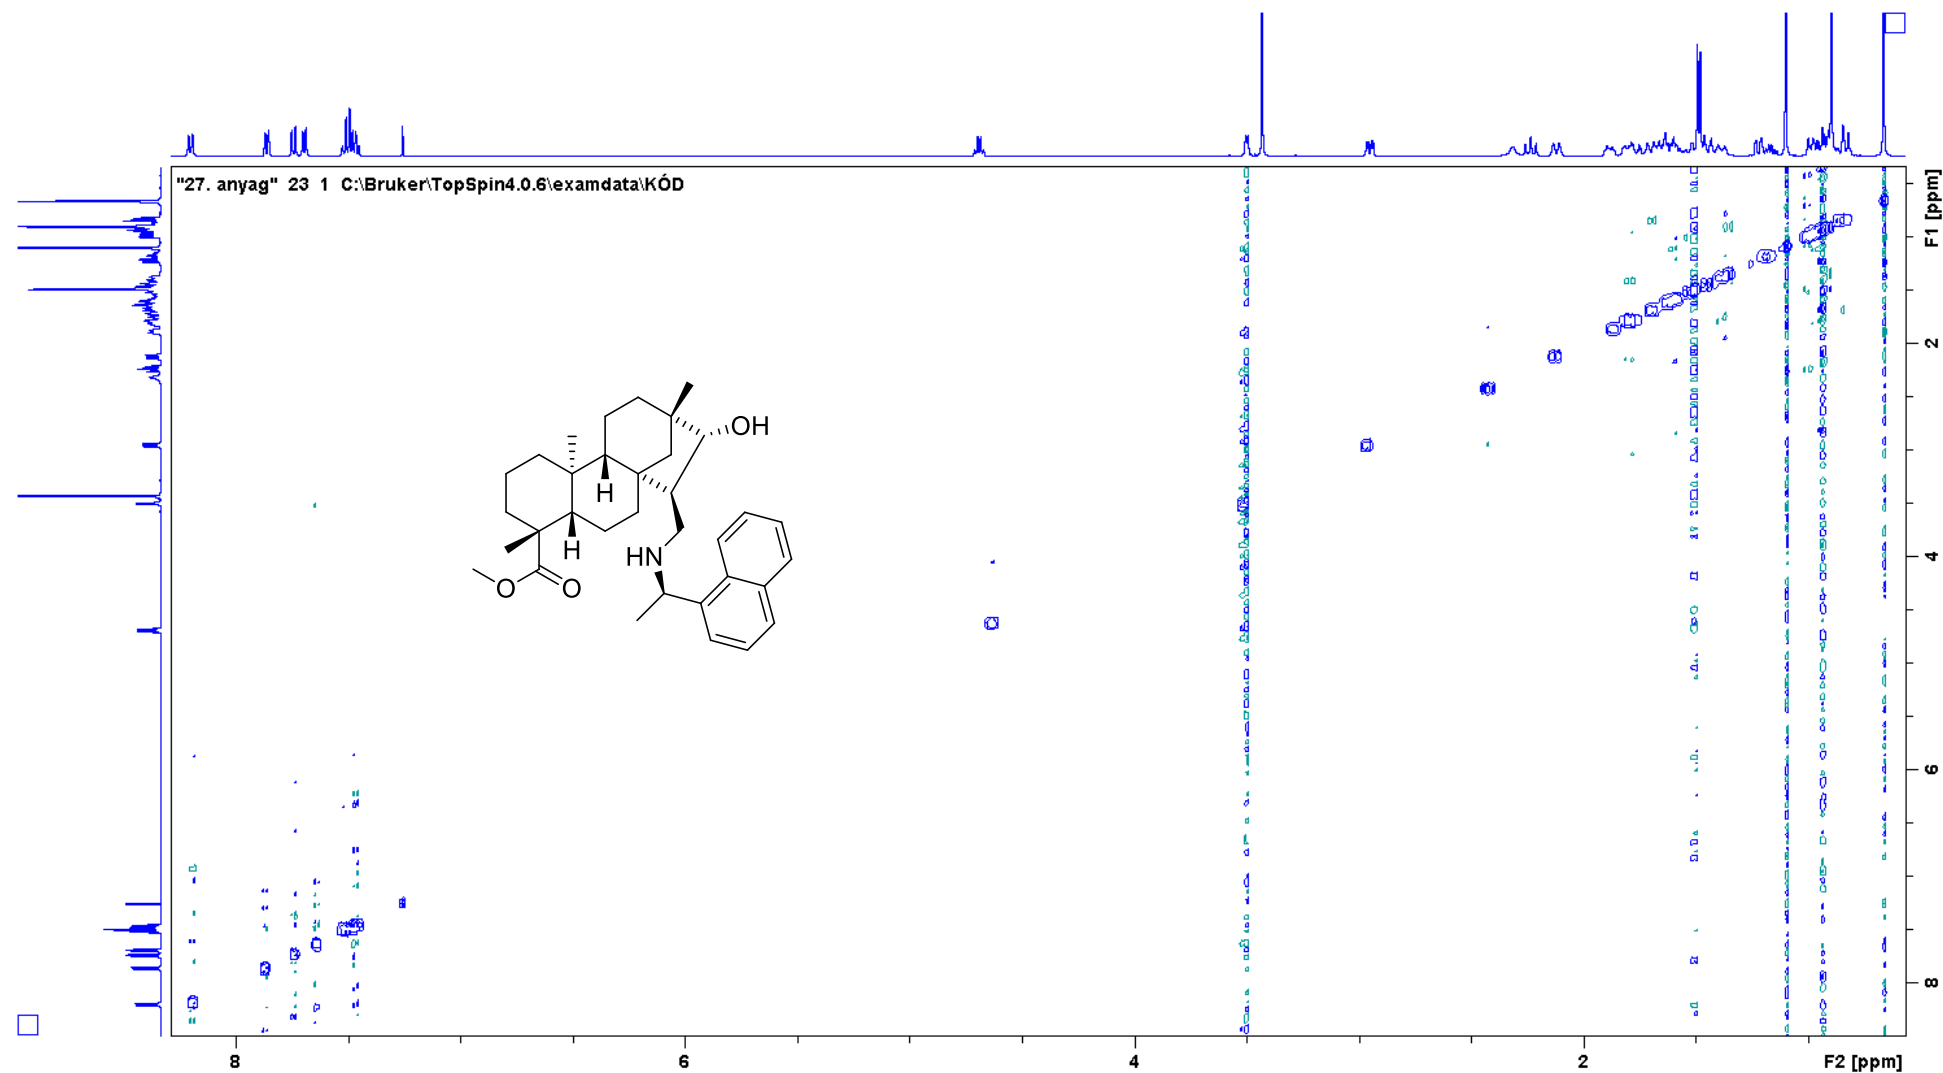

Figure S132

HSQC of compound (4*R*,4*aS*,6*aS*,7*R*,8*R*,9*S*,11*bS*)-Methyl 8-hydroxy-4,9,11*b*-trimethyl-7-(((*R*)-1-(naphthalen-2-yl)ethyl)amino)methyl)tetradecahydro-6*a*,9-methanocyclohepta[*a*]naphthalene-4-carboxylate (**27**):

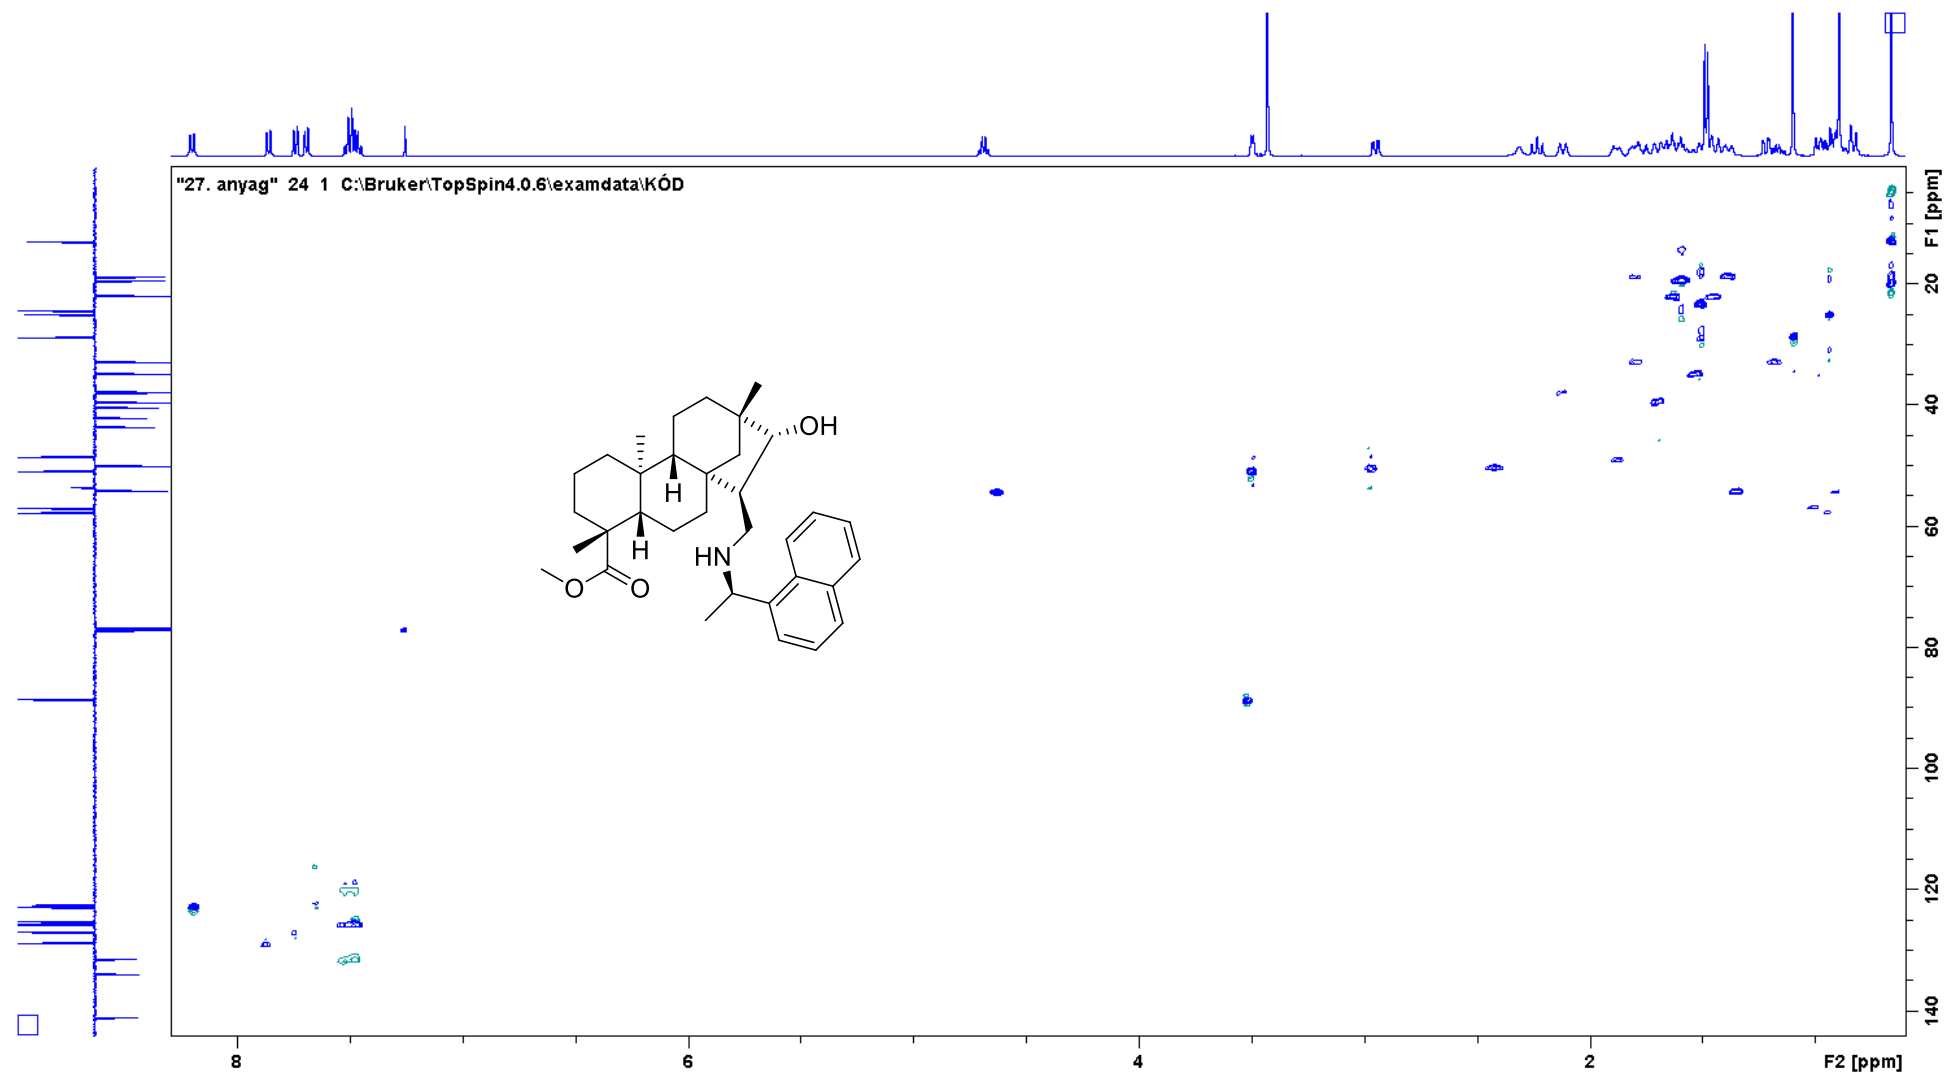

Figure S133

HMBC of compound (4*R*,4*aS*,6*aS*,7*R*,8*R*,9*S*,11*bS*)-Methyl 8-hydroxy-4,9,11*b*-trimethyl-7-(((*R*)-1-(naphthalen-2-yl)ethyl)amino)methyl)tetradecahydro-6*a*,9-methanocyclohepta[*a*]naphthalene-4-carboxylate (**27**):

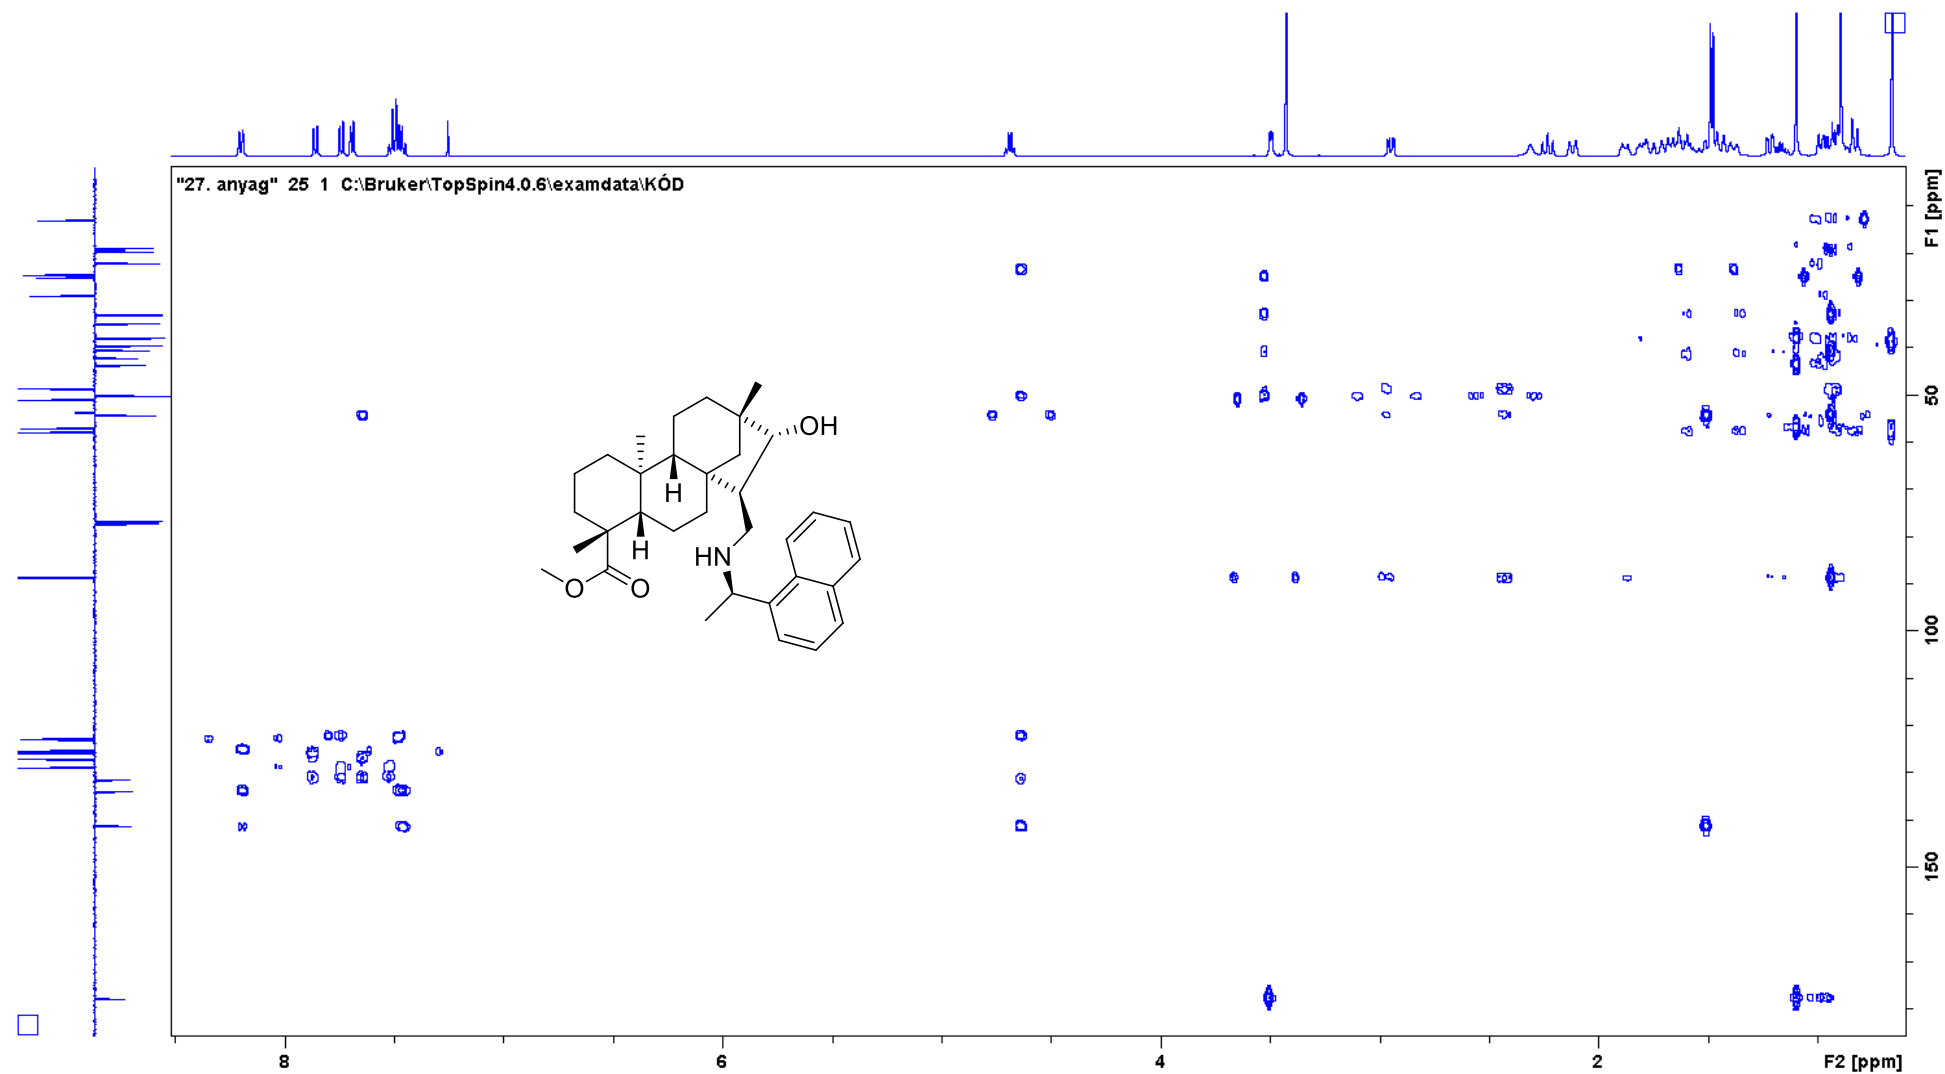



Figure S134

<sup>1</sup>H-NMR of compound (4*R*,4*aS*,6*aS*,7*R*,8*R*,9*S*,11*bS*)-Methyl 7-(((3-(1*H*-imidazol-1-yl)propyl)amino)methyl)-8-hydroxy-4,9,11*b*-trimethyltetradecahydro-6*a*,9-methanocyclohepta[*a*]naphthalene-4-carboxylate (**28**):

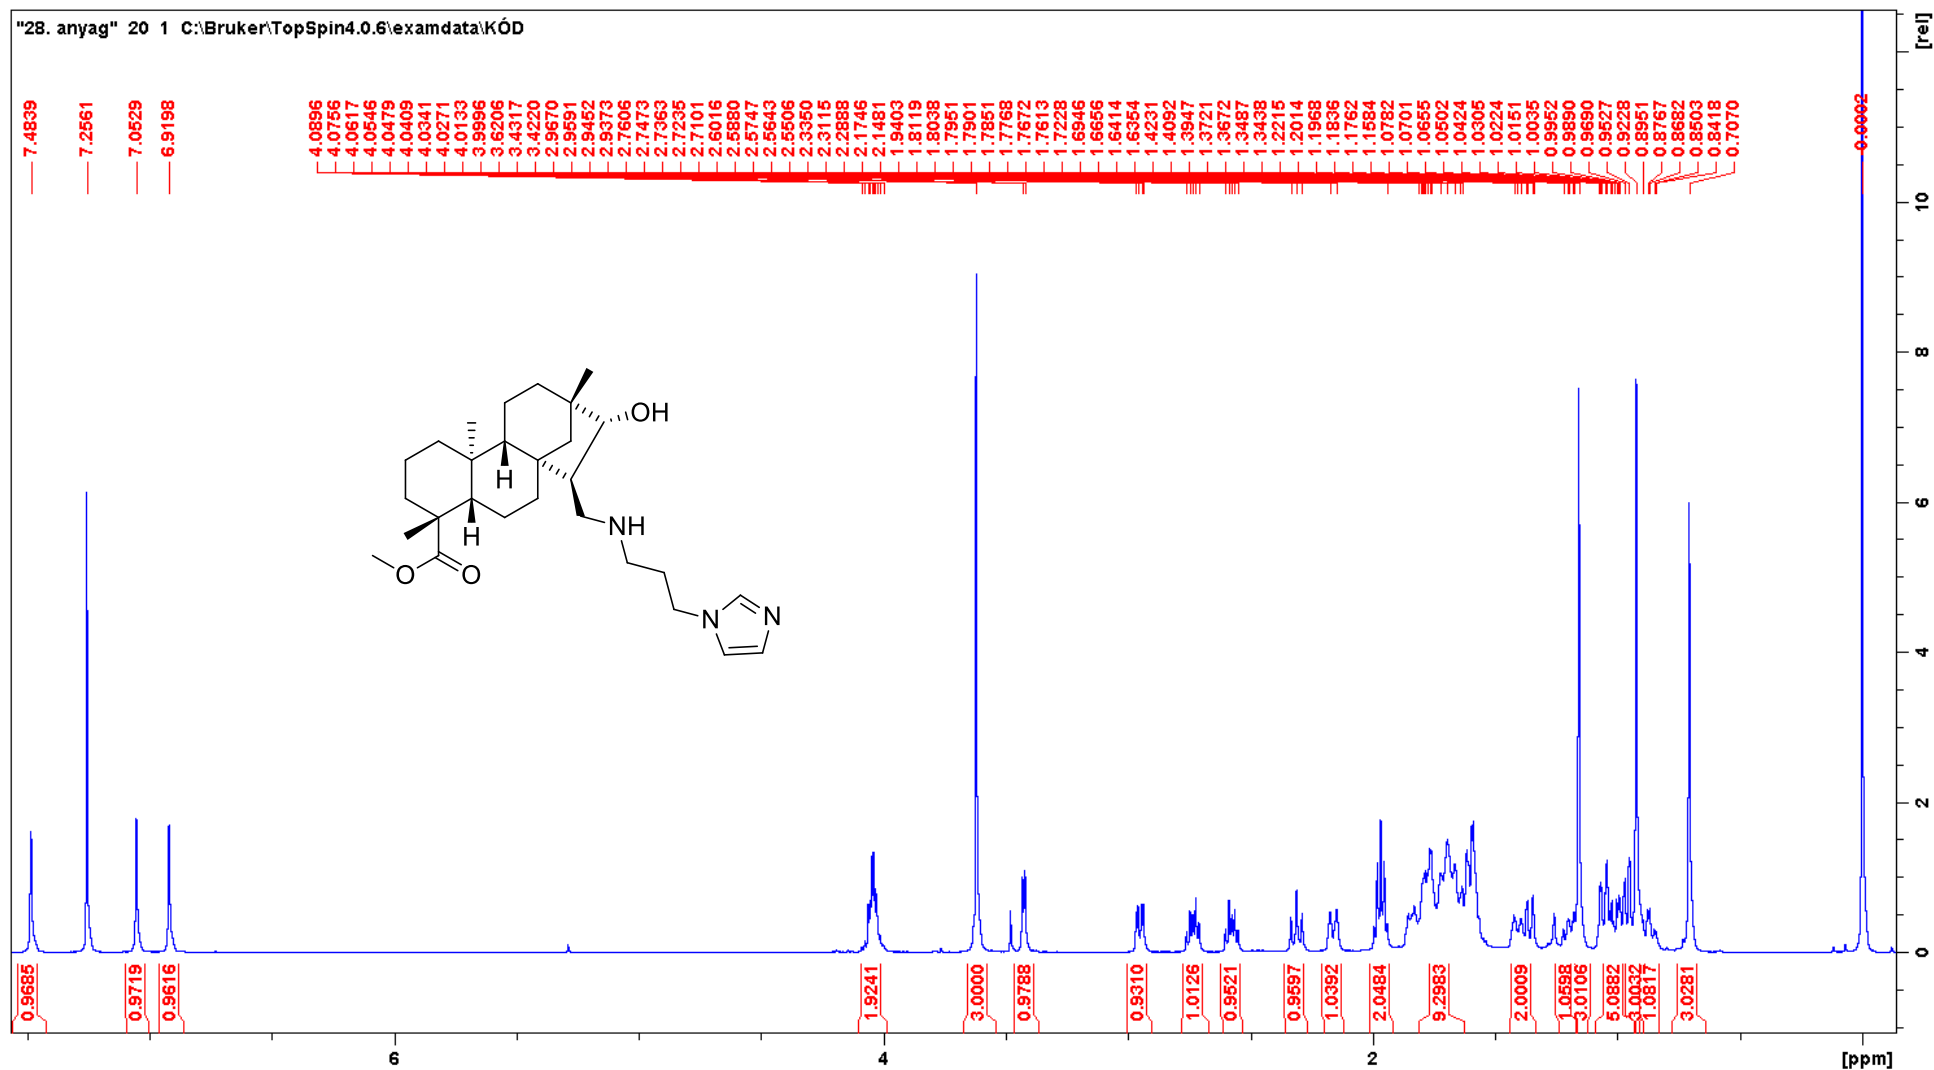

Figure S135

$^{13}\text{C}$ -NMR of compound (4*R*,4*aS*,6*aS*,7*R*,8*R*,9*S*,11*bS*)-Methyl 7-(((3-(1*H*-imidazol-1-yl)propyl)amino)methyl)-8-hydroxy-4,9,11*b*-trimethyltetradecahydro-6*a*,9-methanocyclohepta[*a*]naphthalene-4-carboxylate (**28**):

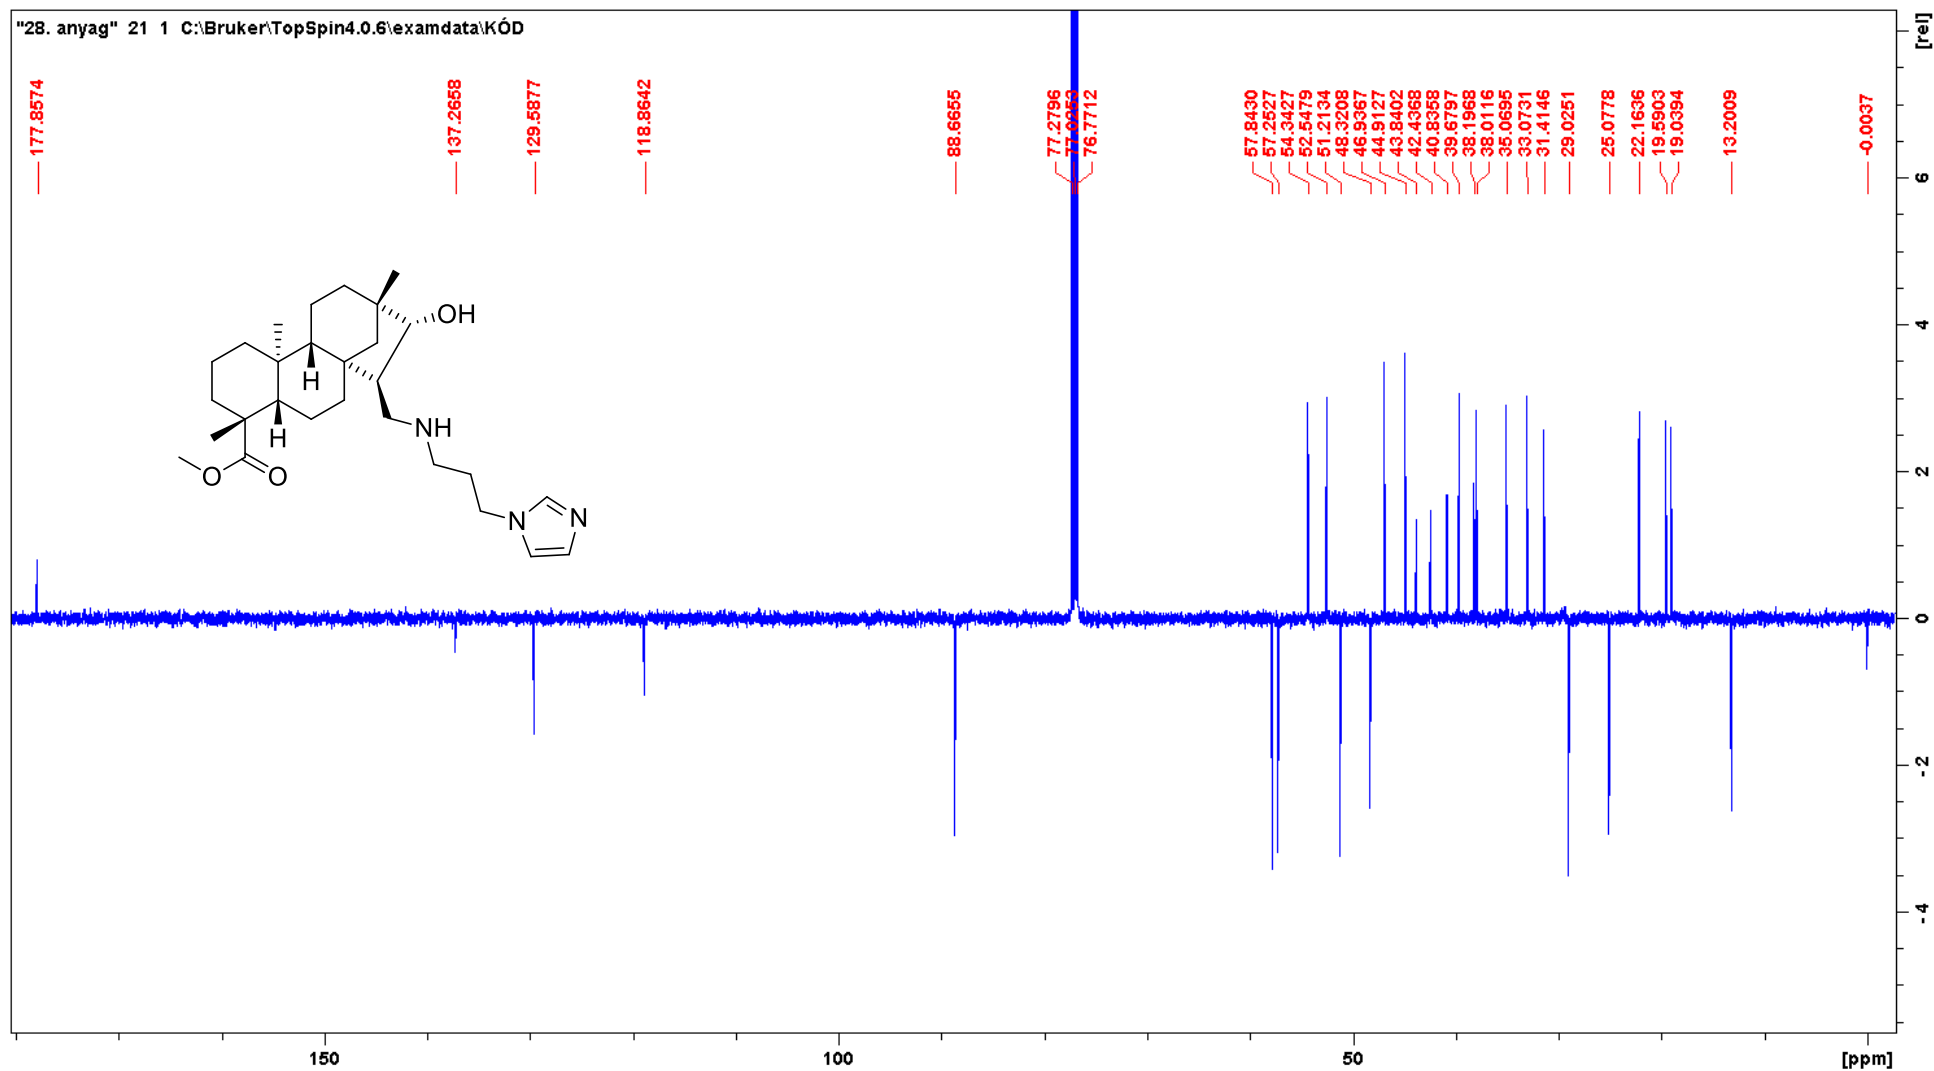

Figure S136

COSY of compound (4*R*,4*aS*,6*aS*,7*R*,8*R*,9*S*,11*bS*)-Methyl 7-(((3-(1*H*-imidazol-1-yl)propyl)amino)methyl)-8-hydroxy-4,9,11*b*-trimethyltetradecahydro-6*a*,9-methanocyclohepta[*a*]naphthalene-4-carboxylate (**28**):

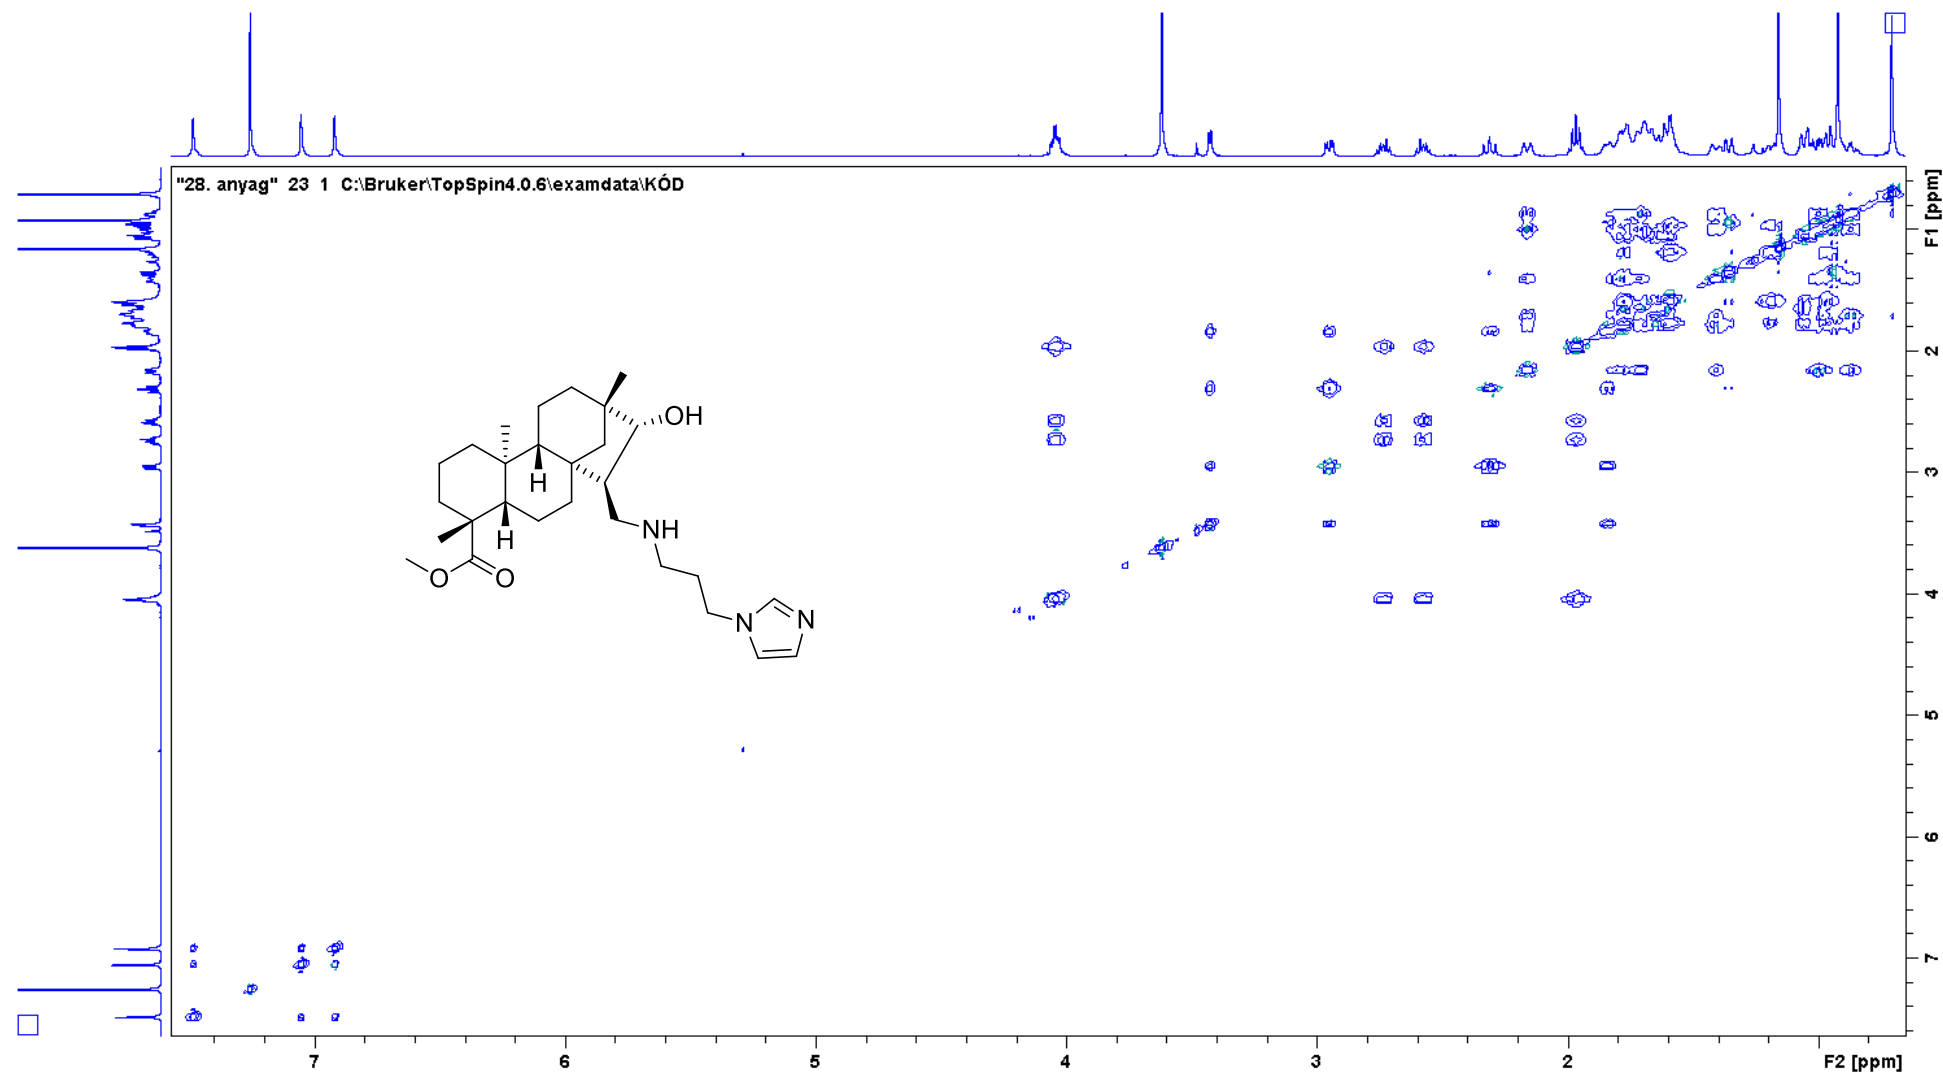

Figure S137

NOESY of compound (4*R*,4*aS*,6*aS*,7*R*,8*R*,9*S*,11*bS*)-Methyl 7-(((3-(1*H*-imidazol-1-yl)propyl)amino)methyl)-8-hydroxy-4,9,11*b*-trimethyltetradecahydro-6*a*,9-methanocyclohepta[*a*]naphthalene-4-carboxylate (**28**):

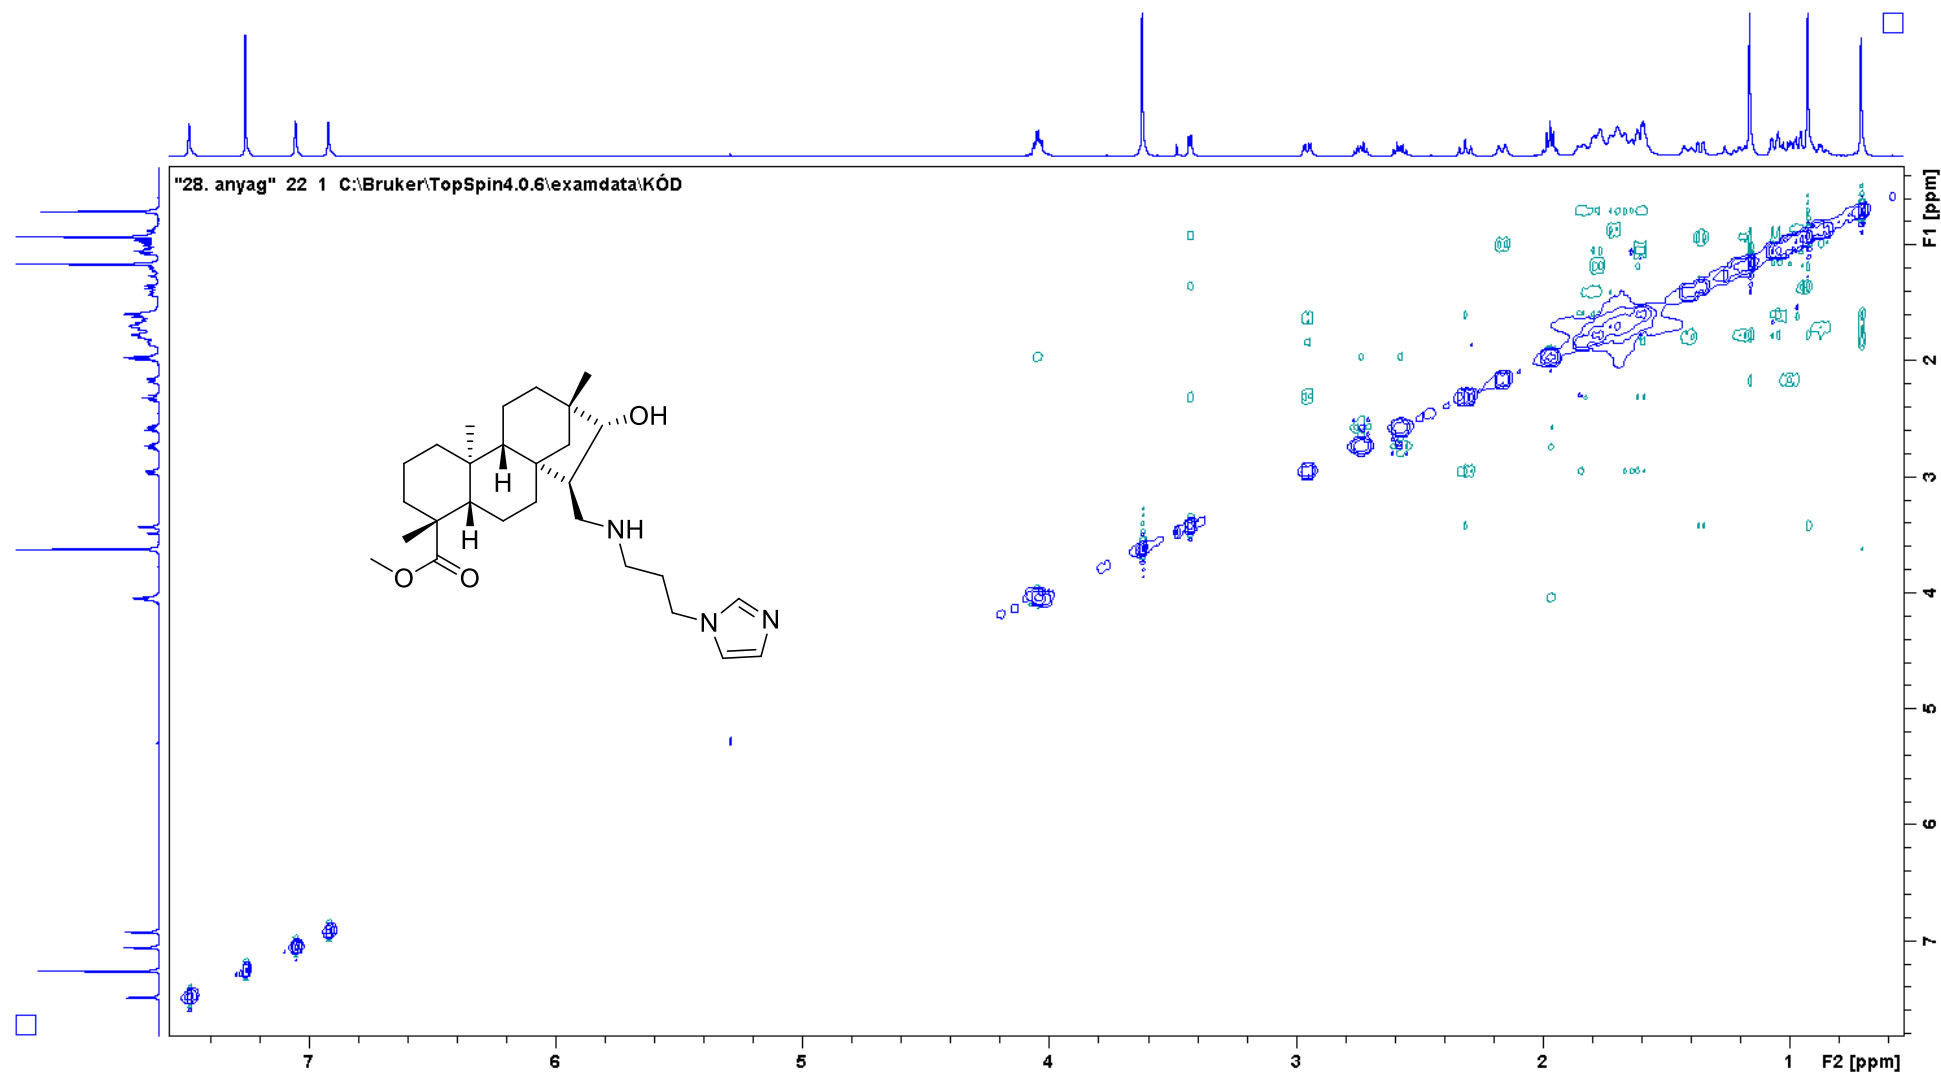

HSQC of compound (4*R*,4*a**S*,6*a**S*,7*R*,8*R*,9*S*,11*b**S*)-Methyl 7-(((3-(1*H*-imidazol-1-yl)propyl)amino)methyl)-8-hydroxy-4,9,11*b*-trimethyltetradecahydro-6*a*,9-methanocyclohepta[*a*]naphthalene-4-carboxylate (**28**):

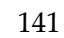

Figure S139

HMBC of compound (4*R*,4*a**S*,6*a**S*,7*R*,8*R*,9*S*,11*b**S*)-Methyl 7-(((3-(1*H*-imidazol-1-yl)propyl)amino)methyl)-8-hydroxy-4,9,11*b*-trimethyltetradecahydro-6*a*,9-methanocyclohepta[*a*]naphthalene-4-carboxylate (**28**):

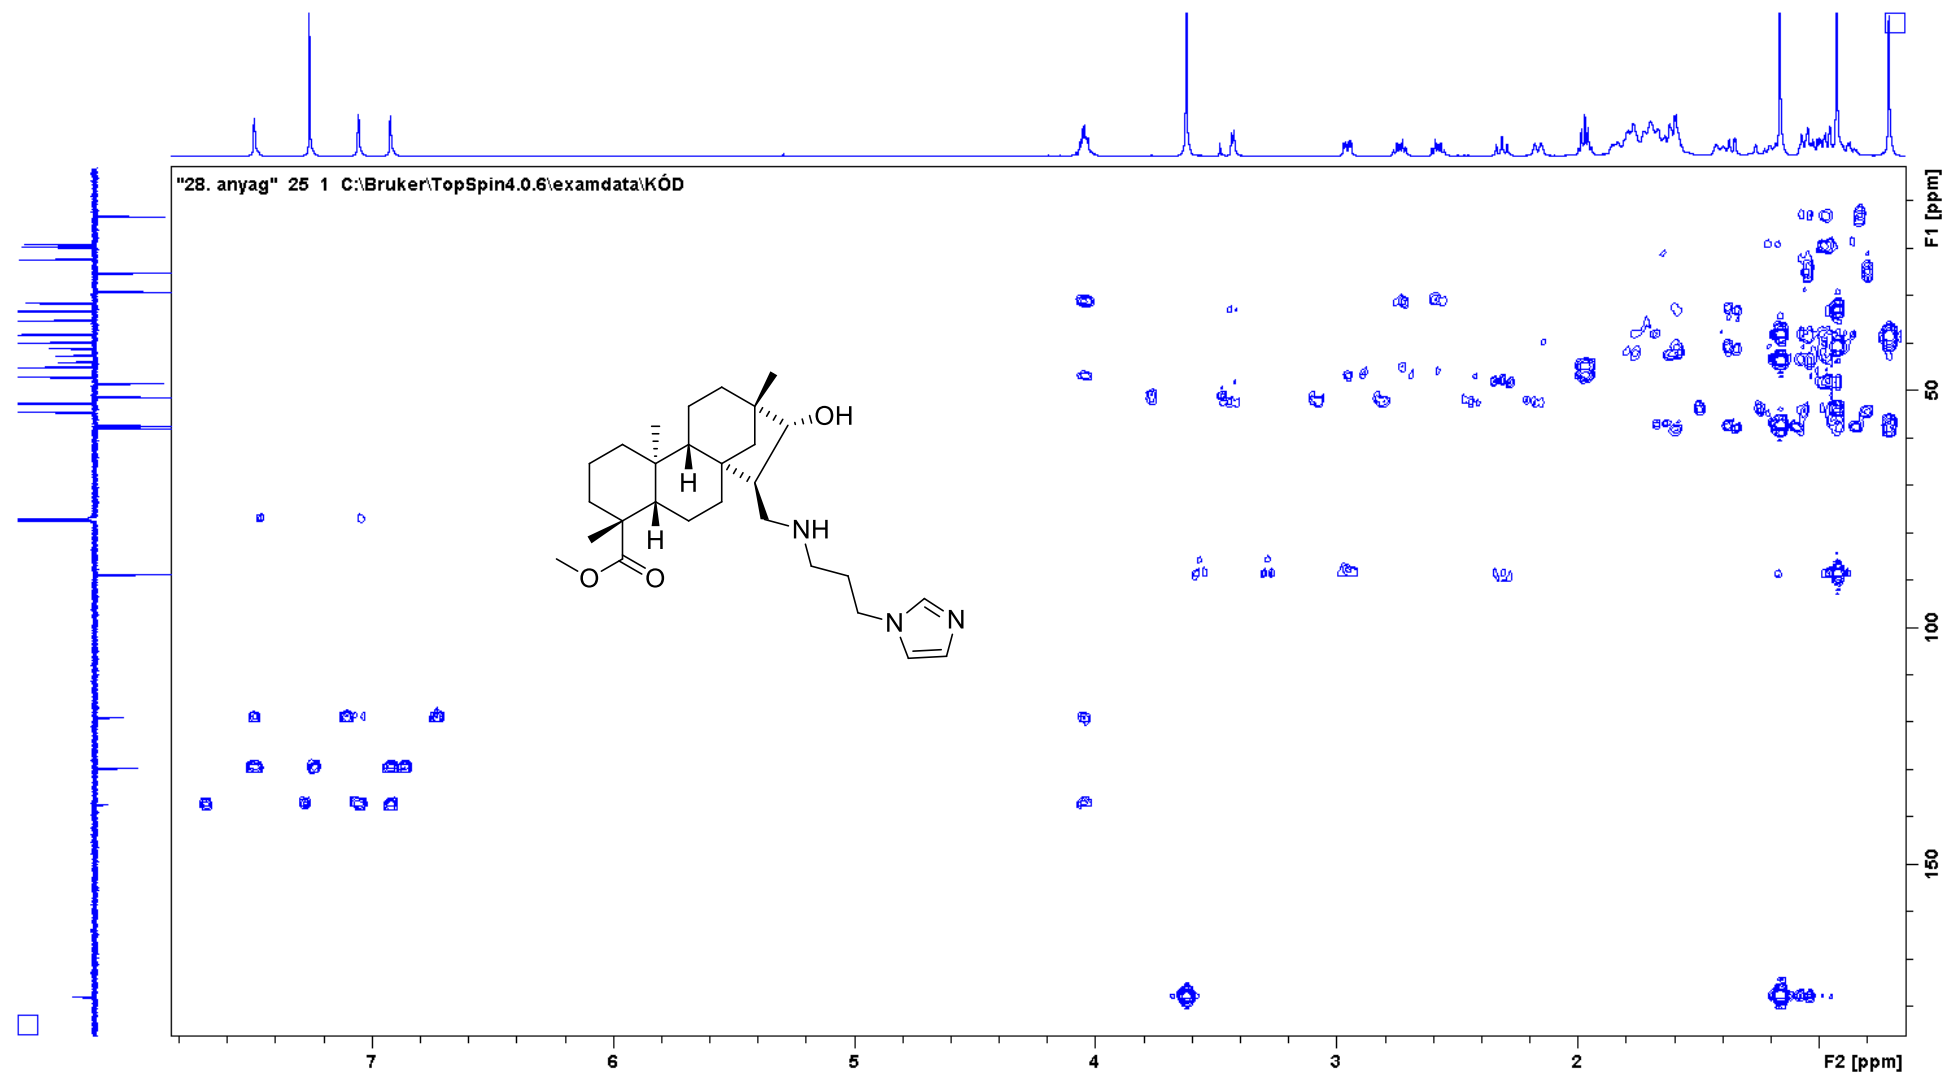

Supplement: s1 [file s1]
